# Supplementary material for: [Fe4S4] cubane in sulfite reductases: new insights into bonding properties and reactivity
Source: Royal Society of Chemistry journal article supplement (doi:10.1039/d2cp02124b), 2022-01-01
Supplement: d2cp02124b1.pdf [file d2cp02124b1.pdf]

## Supporting Information

for

### **[Fe<sub>4</sub>S<sub>4</sub>] cubane in sulfite reductases: new insights into bonding properties and reactivity**

Shahriar N. Khan,<sup>a</sup> Alexa Griffith,<sup>b</sup> Frank De Proft<sup>c</sup>, Evangelos Miliordos,<sup>a</sup> Remco W.A. Havenith,<sup>d</sup> Dmytro Bykov,<sup>b\*</sup> Ana V. Cunha,<sup>b,c,e\*</sup>

<sup>a</sup>Department of Chemistry and Biochemistry, Auburn University, Auburn, AL 36849-5312, USA

<sup>b</sup>Center for Computational Sciences, Oak Ridge National Laboratory, Oak Ridge, TN 37831-6373, USA

<sup>c</sup>Eenheid Algemene Chemie (ALGC), Vrije Universiteit Brussel (VUB), Pleinlaan 2, 1050 Brussels, Belgium

<sup>d</sup>Stratingh Institute for Chemistry and Zernike Institute for Advanced Materials, University of Groningen, Nijenborgh 4, 9747 AG Groningen, The Netherlands and Ghent Quantum Chemistry Group, Department of Chemistry, Ghent University, Krijgslaan 281 (S3), B-9000 Gent, Belgium

<sup>e</sup>Department of Chemistry of the University of Antwerp, Groenenborgerlaan 171, 2020 Antwerp, Belgium

## Table of Contents

|                                                                                                                                                                                                           |     |
|-----------------------------------------------------------------------------------------------------------------------------------------------------------------------------------------------------------|-----|
| <b>Computational Information</b>                                                                                                                                                                          | S3  |
| <b>Figure S1.</b> Residue arrangement in constructed model                                                                                                                                                | S3  |
| <b>Table S1.</b> Geometric parameters of the heme species with ligands                                                                                                                                    | S3  |
| <b>Table S2.</b> Results of the EDA analysis for the low and intermediate-spin siroheme-compounds                                                                                                         | S5  |
| <b>Table S3.</b> Relative energies of the heme and siroheme species with ligands HSO <sub>3</sub> <sup>-</sup> , SO <sub>3</sub> <sup>2-</sup> , and NO <sub>2</sub> <sup>-</sup>                         | S6  |
| <b>Figure S2.</b> Density difference plots upon complexation of the ligand for the Siro-Fe compounds                                                                                                      | S7  |
| <b>Figure S3.</b> Density difference plots upon complexation of the ligand for the Cub-Siro-Fe compounds                                                                                                  | S7  |
| <b>Figure S4.</b> Plots of the dual descriptor for the Siro-Fe compounds                                                                                                                                  | S8  |
| <b>Figure S5.</b> Plots of the dual descriptor for the Cub-Siro-Fe compounds                                                                                                                              | S8  |
| <b>Figure S6.</b> Plots of the electrostatic potential (plotted at the density for isovalue 0.03) for the Siro-Fe compounds                                                                               | S9  |
| <b>Figure S7.</b> Plots of the electrostatic potential (plotted at the density for isovalue 0.03) for the Cub-Siro-Fe compounds                                                                           | S9  |
| <b>Table S4.</b> cDFT descriptors for the Siro-Fe <sup>2+/3+</sup> -(HSO <sub>3</sub> <sup>-</sup> , SO <sub>3</sub> <sup>2-</sup> , NO <sub>2</sub> <sup>-</sup> ) pre-complexes with and without cubane | S10 |
| <b>Table S5.</b> cDFT descriptors for the Siro-Fe <sup>2+/3+</sup> -(HSO <sub>3</sub> <sup>-</sup> , SO <sub>3</sub> <sup>2-</sup> , NO <sub>2</sub> <sup>-</sup> ) complexes with and without cubane     | S10 |
| <b>Table S6.</b> Cartesian coordinates (Å) of the siroheme species with the ligands                                                                                                                       | S10 |
| <b>Table S7.</b> Cartesian coordinates (Å) of the siroheme species without the ligands                                                                                                                    | S25 |
| <b>Table S8.</b> Cartesian coordinates (Å) of the heme species with the ligands                                                                                                                           | S41 |
| <b>Table S9.</b> Cartesian coordinates (Å) of the heme species without the ligands                                                                                                                        | S56 |
| <b>Table S10.</b> Cartesian coordinates (Å) of the ligands                                                                                                                                                | S71 |
| <b>Table S11.</b> Cartesian coordinates (Å) of the Cub-Siro-Fe <sup>2+/3+</sup> complexes                                                                                                                 | S71 |

## Computational Information

Constraints were imposed in the models to best mimic the steric hindrance in the protein environment. The second sphere distal ligands Arg<sub>α</sub>98, Arg<sub>α</sub>170, Lys<sub>α</sub>211, and Lys<sub>α</sub>213 were retained in the model due to their positive charge and torsional flexibility. Water molecules present in the crystallographic data are expected to contribute to the reduction of the substrate via coordination with the residues; therefore, two water molecules are included in the active-site model (Figure S1). The distal ligands were truncated at the α-carbon.

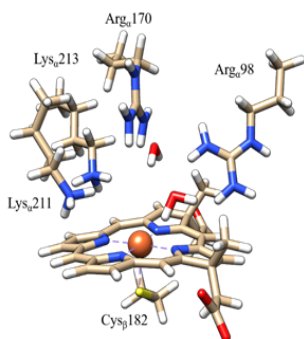

**Figure S1.** Residue arrangement in constructed model (orange = Fe, brown = C, red = O, blue = N, white = H, yellow = S).

The siroheme, along with two attached carboxylate groups, were included in the model. Experimental studies suggest that the negatively charged carboxylate groups on the siroheme form a tight network with the positively charged residues and are therefore essential components of the active site.<sup>1</sup> Cysteine is the proximal ligand of iron and was truncated at its α-carbon.

Mutational studies suggest that Arg<sub>α</sub>98, Arg<sub>α</sub>170, Lys<sub>α</sub>211, and Lys<sub>α</sub>213 are structurally and mechanistically essential to the reactivity of the active site.<sup>3</sup> Previous research indicates that the catalytic residues surrounding the active site move in a range of 0.2 - 0.4 Å towards the substrate and effectively provide a caged proton concentration in the active site that stabilizes the negative charge of the substrate and carboxylate groups.<sup>2</sup> In an attempt to imitate the protein environment accurately, constraints were implemented on the residue ligands proximal to the active site. This approach has been successful in other protein studies.<sup>3,4</sup> The N-terminus δ-carbon of Lys<sub>α</sub>211, Lys<sub>α</sub>213, α-carbon of Cys<sub>β</sub>182 and N-terminus γ- and δ-carbons of Arg<sub>α</sub>98 and Arg<sub>α</sub>170 were spatially constrained. Experimental crystallographic studies of substrate-bound structures show that the active site does not undergo significant conformational changes upon substrate binding.<sup>1</sup>

The predicted acidities of the side chains determined the active-site protonation scheme. The relative acidities of each residue were estimated using the PROPKA program.<sup>5,6</sup> The well-suited proton donors, arginine, and lysine, have a typical p*K*<sub>a</sub> ~12.50 and ~ 10.50, respectively. In the protein environment, Lys<sub>α</sub>213 and Lys<sub>α</sub>211 are predicted to have a p*K*<sub>a</sub> ~ 6.59 and 9.67, respectively. Lysine has a p*K*<sub>a</sub> value close to physiological pH, making the chain a suitable proton donor. Additionally, Arg<sub>α</sub>170 and Arg<sub>α</sub>98 are predicted to have a p*K*<sub>a</sub> of ~11.33 and ~12.97 in the protein. Therefore, all four side-chain residues were protonated in this study. Sirohemes have been experimentally observed to activate various substrates.<sup>1</sup> For this reason, this study includes three substrates (HSO<sub>3</sub><sup>-</sup>, SO<sub>3</sub><sup>2-</sup>, and NO<sub>2</sub><sup>-</sup>). HSO<sub>3</sub><sup>-</sup> was identified from crystallographic data since one sulfur-oxygen bond was 0.2 Å longer than the others.<sup>2</sup>

**Table S1.** Geometric parameters (distances (d) in Å) of the heme species with ligands (without the cubane cluster) optimized at BP86/TZ2P level of theory, together with ligand interaction energies (E<sub>int</sub>) of the species at B3LYP//BP86/TZ2P, and TPSSh//BP86/TZ2P (kcal/mol)

| Species                                              | Spin State, S | d <sub>Fe-S/N</sub> | Average d <sub>S-O/N-O</sub> | d <sub>S-OH</sub> | E <sub>int</sub> (B3LYP//BP86) | E <sub>int</sub> (TPSSh//BP86) |
|------------------------------------------------------|---------------|---------------------|------------------------------|-------------------|--------------------------------|--------------------------------|
| HSO <sub>3</sub> <sup>-</sup>                        | 0             |                     | 1.506                        | 1.774             |                                |                                |
| Heme-Fe <sup>2+</sup> -HSO <sub>3</sub> <sup>-</sup> | 0             | 2.176               | 1.530                        | 1.659             | -44.5                          | -42.3                          |
| Heme-Fe <sup>2+</sup> -HSO <sub>3</sub> <sup>-</sup> | 1             | 2.211               | 1.526                        | 1.659             | -41.1                          | -42.2                          |

|                                                      |     |       |       |       |        |        |
|------------------------------------------------------|-----|-------|-------|-------|--------|--------|
| Heme-Fe <sup>2+</sup> -HSO <sub>3</sub> <sup>-</sup> | 2   | 3.233 | 1.531 | 1.664 | -45.4  | -40.6  |
| Heme-Fe <sup>3+</sup> -HSO <sub>3</sub> <sup>-</sup> | 1/2 | 2.252 | 1.519 | 1.656 | -37.1  | -37.7  |
| Heme-Fe <sup>3+</sup> -HSO <sub>3</sub> <sup>-</sup> | 3/2 | 2.401 | 1.514 | 1.634 | -53.9  | -52.0  |
| Heme-Fe <sup>3+</sup> -HSO <sub>3</sub> <sup>-</sup> | 5/2 | 3.448 | 1.541 | 1.635 | -80.5  | -72.0  |
| SO <sub>3</sub> <sup>2-</sup>                        | 0   |       | 1.558 |       |        |        |
| Heme-Fe <sup>2+</sup> -SO <sub>3</sub> <sup>2-</sup> | 0   | 2.277 | 1.544 |       | -103.8 | -102.2 |
| Heme-Fe <sup>2+</sup> -SO <sub>3</sub> <sup>2-</sup> | 1   | 2.315 | 1.542 |       | -110.2 | -107.6 |
| Heme-Fe <sup>2+</sup> -SO <sub>3</sub> <sup>2-</sup> | 2   | 3.475 | 1.563 |       | -112.0 | -105.2 |
| Heme-Fe <sup>3+</sup> -SO <sub>3</sub> <sup>2-</sup> | 1/2 | 2.317 | 1.538 |       | -148.9 | -146.4 |
| Heme-Fe <sup>3+</sup> -SO <sub>3</sub> <sup>2-</sup> | 3/2 | 2.390 | 1.533 |       | -151.2 | -146.2 |
| Heme-Fe <sup>3+</sup> -SO <sub>3</sub> <sup>2-</sup> | 5/2 | 3.167 | 1.557 |       | -126.9 | -106.0 |
| NO <sub>2</sub> <sup>-</sup>                         | 0   |       | 1.277 |       |        |        |
| Heme-Fe <sup>2+</sup> -NO <sub>2</sub> <sup>-</sup>  | 0   | 1.824 | 1.328 |       | -56.9  | -56.7  |
| Heme-Fe <sup>2+</sup> -NO <sub>2</sub> <sup>-</sup>  | 1   | 1.840 | 1.326 |       | -51.9  | -51.8  |
| Heme-Fe <sup>2+</sup> -NO <sub>2</sub> <sup>-</sup>  | 2   | 2.027 | 1.356 |       | -48.1  | -50.8  |
| Heme-Fe <sup>3+</sup> -NO <sub>2</sub> <sup>-</sup>  | 1/2 | 1.860 | 1.315 |       | -76.5  | -77.4  |
| Heme-Fe <sup>3+</sup> -NO <sub>2</sub> <sup>-</sup>  | 3/2 | 1.918 | 1.301 |       | -67.6  | -69.8  |
| Heme-Fe <sup>3+</sup> -NO <sub>2</sub> <sup>-</sup>  | 5/2 | 2.052 | 1.341 |       | -48.1  | -54.4  |

**Table S2.** Results of the EDA analysis (all in kcal/mol) for the low and intermediate-spin siroheme-compounds.  $E_{\text{Pauli}}$  is the Pauli repulsion,  $E_{\text{el}}$  is the electrostatic interaction,  $E_{\text{orb}}$  is the orbital interaction,  $\Delta E_{\text{solv}}$  is the difference in solvation energy between the molecule and the fragments,  $E_{\text{total}}$  is the total bonding energy at the optimized geometry of the cluster,  $E_{\text{total-rel}}$  is the bonding energy in which the relaxation of the individual components has been taken into consideration.

$${}^{\text{a}}E_{\text{steric}} = E_{\text{Pauli}} + E_{\text{el}}$$

| Species                                                                      | $E_{\text{Pauli}}$ | $E_{\text{el}}$ | $E_{\text{steric}}^{\text{a}}$ | $E_{\text{orb}}$ | $\Delta E_{\text{solv}}$ | $E_{\text{total}}$ | $E_{\text{total-rel}}$ |
|------------------------------------------------------------------------------|--------------------|-----------------|--------------------------------|------------------|--------------------------|--------------------|------------------------|
| <i>Intermediate spin (S = 1 (Fe<sup>2+</sup>)/S = 1.5 (Fe<sup>3+</sup>))</i> |                    |                 |                                |                  |                          |                    |                        |
| Siro-Fe <sup>2+</sup> -HSO <sub>3</sub> <sup>-</sup>                         | 236.3              | -315.7          | -79.4                          | -113.3           | 121.0                    | -71.6              | -45.6                  |
| Siro-Fe <sup>3+</sup> -HSO <sub>3</sub> <sup>-</sup>                         | 187.3              | -677.6          | -490.3                         | -111.9           | 419.0                    | -183.2             | -83.7                  |
| Siro-Fe <sup>2+</sup> -SO <sub>3</sub> <sup>2-</sup>                         | 321.1              | -511.0          | -189.9                         | -189.3           | 249.5                    | -129.7             | -104.2                 |
| Siro-Fe <sup>3+</sup> -SO <sub>3</sub> <sup>2-</sup>                         | 188.0              | -563.9          | -375.8                         | -123.6           | 340.1                    | -159.3             | -144.8                 |
| Siro-Fe <sup>2+</sup> -NO <sub>2</sub> <sup>-</sup>                          | 321.7              | -322.2          | -0.5                           | -205.9           | 109.8                    | -96.6              | -42.5                  |
| Siro-Fe <sup>3+</sup> -NO <sub>2</sub> <sup>-</sup>                          | 77.9               | -273.4          | -195.5                         | -42.4            | 160.4                    | -77.6              | -53.6                  |

*Low spin (S = 0 (Fe<sup>2+</sup>)/S = 0.5 (Fe<sup>3+</sup>))*

|                                                      |       |        |        |        |       |        |        |
|------------------------------------------------------|-------|--------|--------|--------|-------|--------|--------|
| Siro-Fe <sup>2+</sup> -HSO <sub>3</sub> <sup>-</sup> | 261.3 | -337.6 | -76.3  | -128.4 | 126.1 | -78.6  | -54.3  |
| Siro-Fe <sup>3+</sup> -HSO <sub>3</sub> <sup>-</sup> | 248.5 | -718.3 | -469.7 | -134.6 | 412.7 | -191.6 | -91.7  |
| Siro-Fe <sup>2+</sup> -SO <sub>3</sub> <sup>2-</sup> | 297.3 | -528.5 | -231.2 | -172.6 | 257.5 | -146.4 | -120.7 |
| Siro-Fe <sup>3+</sup> -SO <sub>3</sub> <sup>2-</sup> | 245.6 | -604.7 | -359.1 | -140.5 | 333.6 | -165.9 | -133.8 |
| Siro-Fe <sup>2+</sup> -NO <sub>2</sub> <sup>-</sup>  | 141.7 | -250.3 | -108.7 | -101.8 | 130.6 | -79.8  | -36.6  |
| Siro-Fe <sup>3+</sup> -NO <sub>2</sub> <sup>-</sup>  | 75.8  | -270.1 | -194.3 | -42.6  | 159.3 | -77.7  | -56.9  |

**Table S3.** Relative energies of the heme and siroheme species with ligands at BP86/TZ2P, B3LYP//BP86/TZ2P, and TPSSH//BP86/TZ2P (kcal/mol)

| Species                                         | Spin state,<br>S | Relative Energy ( $\Delta E$ )<br>BP86 | Relative Energy ( $\Delta E$ )<br>B3LYP//BP86 | Relative Energy ( $\Delta E$ )<br>TPSSH//BP86 |
|-------------------------------------------------|------------------|----------------------------------------|-----------------------------------------------|-----------------------------------------------|
| <b>Substrate- <math>\text{HSO}_3^-</math></b>   |                  |                                        |                                               |                                               |
| Siroheme-Fe <sup>2+</sup>                       | 0                | 0.0                                    | 0.0                                           | 0.0                                           |
| Siroheme-Fe <sup>2+</sup>                       | 1                | 19.7                                   | 15.9                                          | 16.5                                          |
| Siroheme-Fe <sup>2+</sup>                       | 2                | 26.8                                   | 1.1                                           | 16.0                                          |
| Siroheme-Fe <sup>3+</sup>                       | 1/2              | 0.0                                    | 0.0                                           | 0.0                                           |
| Siroheme-Fe <sup>3+</sup>                       | 3/2              | 16.0                                   | 5.5                                           | 13.5                                          |
| Siroheme-Fe <sup>3+</sup>                       | 5/2              | 44.7                                   | 26.6                                          | 38.2                                          |
| heme-Fe <sup>2+</sup>                           | 0                | 0.9                                    | 2.7                                           | 3.3                                           |
| heme-Fe <sup>2+</sup>                           | 1                | 0.0                                    | 0.0                                           | 0.0                                           |
| heme-Fe <sup>2+</sup>                           | 2                | 6.8                                    | -7.5                                          | 2.2                                           |
| heme-Fe <sup>3+</sup>                           | 1/2              | 0.0                                    | 0.0                                           | 0.0                                           |
| heme-Fe <sup>3+</sup>                           | 3/2              | 5.9                                    | 1.4                                           | 2.8                                           |
| heme-Fe <sup>3+</sup>                           | 5/2              | 8.7                                    | -13.4                                         | 0.5                                           |
| <b>Substrate- <math>\text{SO}_3^{2-}</math></b> |                  |                                        |                                               |                                               |
| Siroheme-Fe <sup>2+</sup>                       | 0                | 0.0                                    | 0.0                                           | 0.0                                           |
| Siroheme-Fe <sup>2+</sup>                       | 1                | 18.2                                   | 14.0                                          | 14.9                                          |
| Siroheme-Fe <sup>2+</sup>                       | 2                | 21.8                                   | 0.0                                           | 11.2                                          |
| Siroheme-Fe <sup>3+</sup>                       | 1/2              | 0.0                                    | 0.0                                           | 0.0                                           |
| Siroheme-Fe <sup>3+</sup>                       | 3/2              | 12.2                                   | 0.8                                           | 8.9                                           |
| Siroheme-Fe <sup>3+</sup>                       | 5/2              | 23.1                                   | 2.2                                           | 14.7                                          |
| heme-Fe <sup>2+</sup>                           | 0                | 0.7                                    | 3.1                                           | 3.2                                           |
| heme-Fe <sup>2+</sup>                           | 1                | 0.0                                    | 0.0                                           | 0.0                                           |
| heme-Fe <sup>2+</sup>                           | 2                | 4.3                                    | -8.9                                          | 0.0                                           |
| heme-Fe <sup>3+</sup>                           | 1/2              | 0.0                                    | 0.0                                           | 0.0                                           |
| heme-Fe <sup>3+</sup>                           | 3/2              | 5.2                                    | 0.3                                           | 1.8                                           |
| heme-Fe <sup>3+</sup>                           | 5/2              | 18.5                                   | -5.2                                          | 19.0                                          |
| <b>Substrate- <math>\text{NO}_2^-</math></b>    |                  |                                        |                                               |                                               |
| Siroheme-Fe <sup>2+</sup>                       | 0                | 1.8                                    | 9.8                                           | 7.2                                           |
| Siroheme-Fe <sup>2+</sup>                       | 1                | 0.0                                    | 0.0                                           | 0.0                                           |
| Siroheme-Fe <sup>2+</sup>                       | 2                | 20.9                                   | 15.2                                          | 16.4                                          |
| Siroheme-Fe <sup>3+</sup>                       | 1/2              | 0.0                                    | 0.0                                           | 0.0                                           |
| Siroheme-Fe <sup>3+</sup>                       | 3/2              | 9.9                                    | 1.4                                           | 6.0                                           |
| Siroheme-Fe <sup>3+</sup>                       | 5/2              | 16.8                                   | -3.2                                          | 6.4                                           |
| heme-Fe <sup>2+</sup>                           | 0                | 1.1                                    | 5.8                                           | 4.5                                           |
| heme-Fe <sup>2+</sup>                           | 1                | 0.0                                    | 0.0                                           | 0.0                                           |
| heme-Fe <sup>2+</sup>                           | 2                | 8.1                                    | 3.3                                           | 4.9                                           |
| heme-Fe <sup>3+</sup>                           | 1/2              | 0.0                                    | 0.0                                           | 0.0                                           |
| heme-Fe <sup>3+</sup>                           | 3/2              | 6.6                                    | 9.3                                           | 7.4                                           |
| heme-Fe <sup>3+</sup>                           | 5/2              | 24.1                                   | 26.5                                          | 25.0                                          |

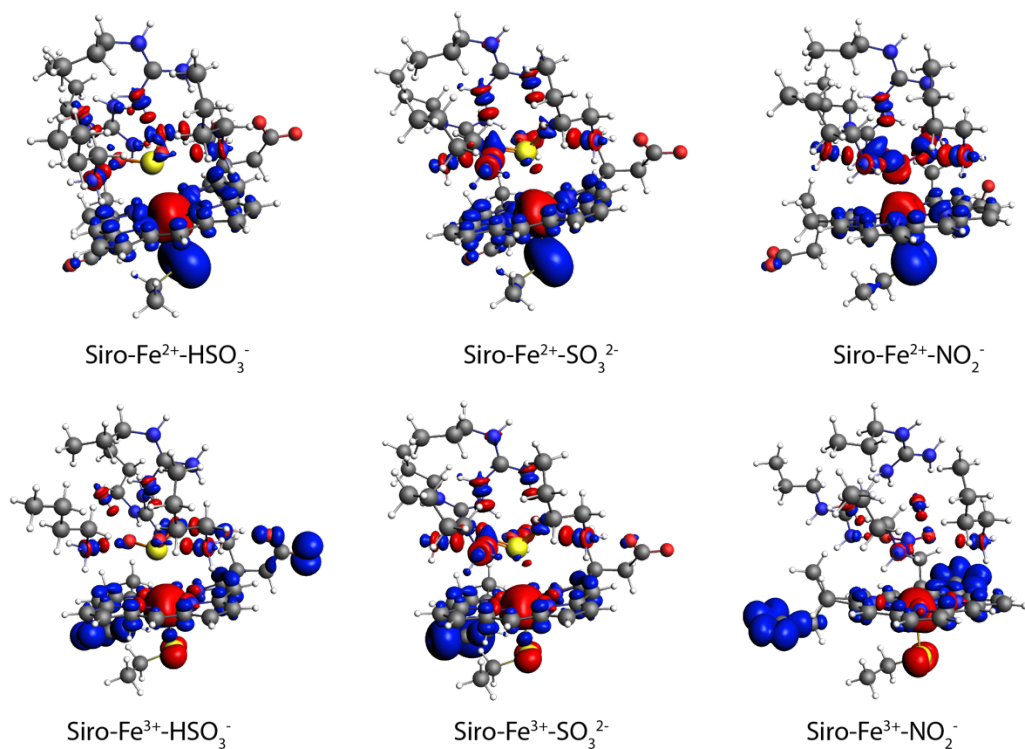

**Figure S2.** Density difference plots upon complexation of the ligand for the Siro-Fe compounds.

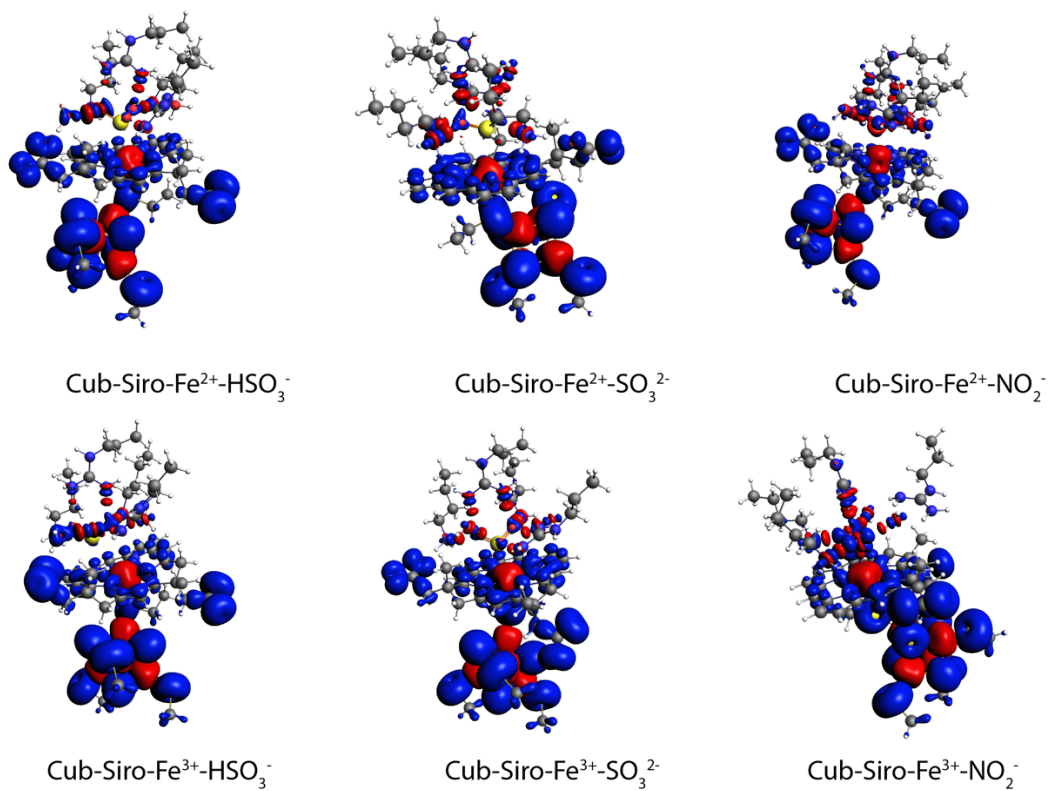

**Figure S3.** Density difference plots upon complexation of the ligand for the Cub-Siro-Fe compounds.

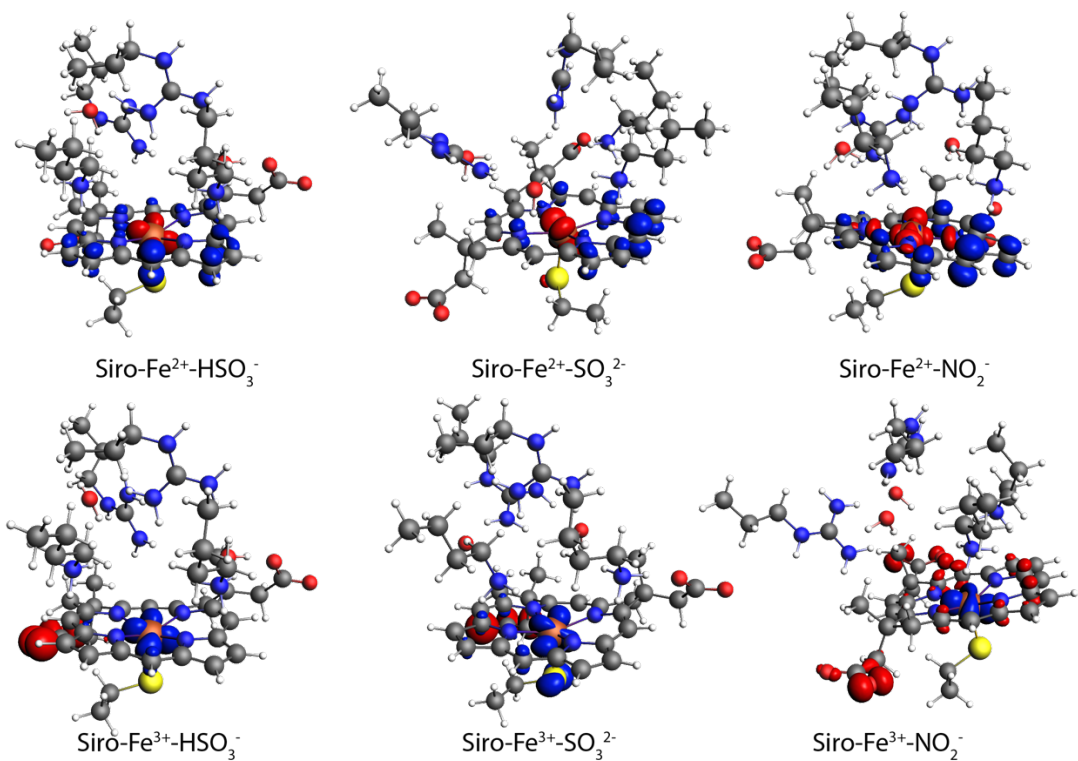

**Figure S4.** Plots of the dual descriptor for the Siro-Fe compounds.

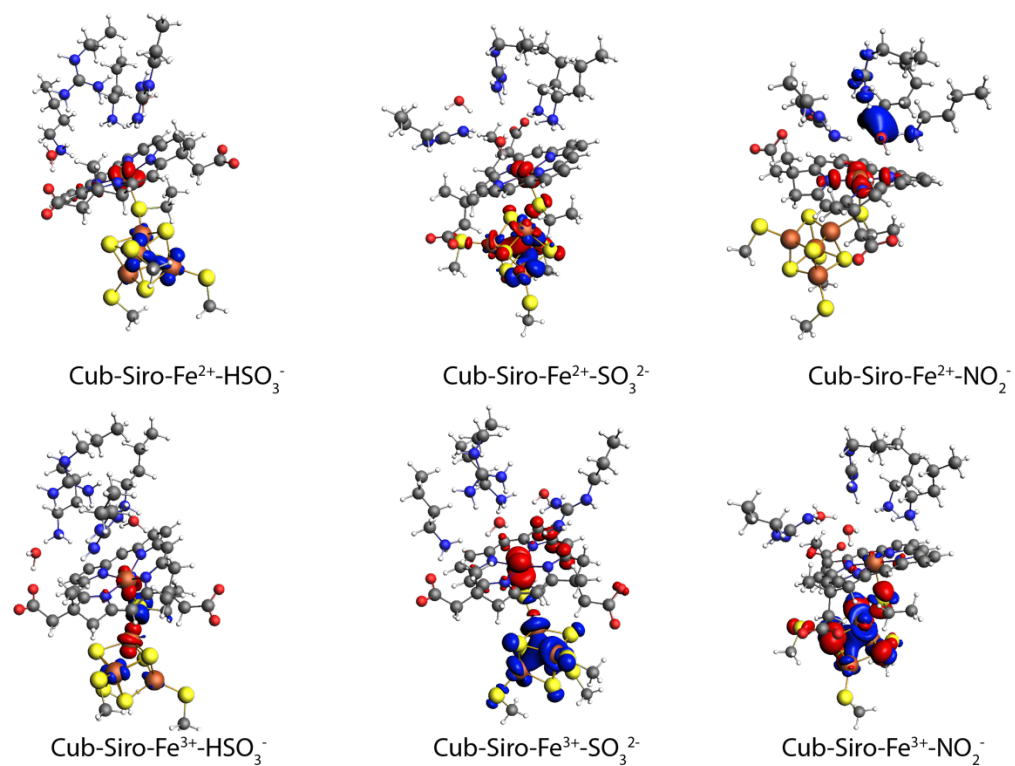

**Figure S5.** Plots of the dual descriptor for the Cub-Siro-Fe compounds.



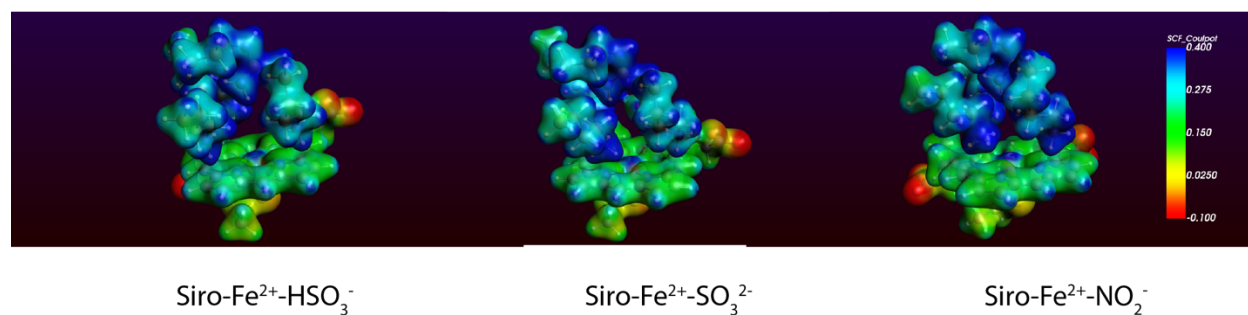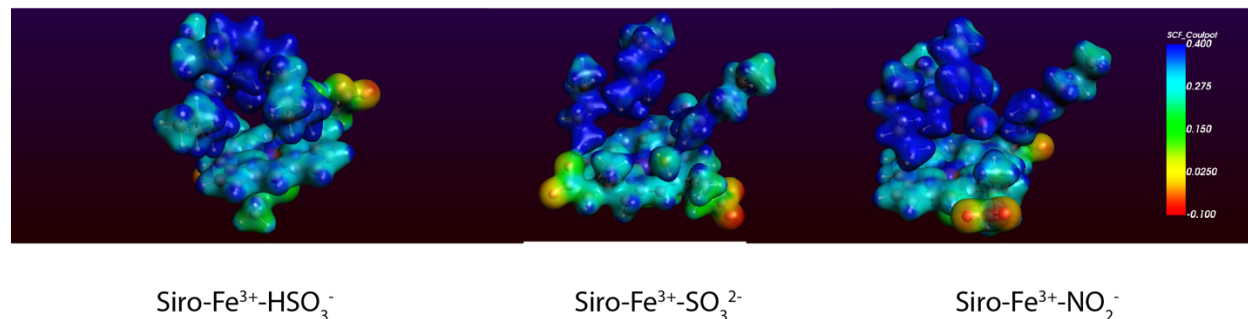

**Figure S6.** Plots of the electrostatic potential (plotted at the density for isovalue 0.03) for the Siro-Fe compounds.

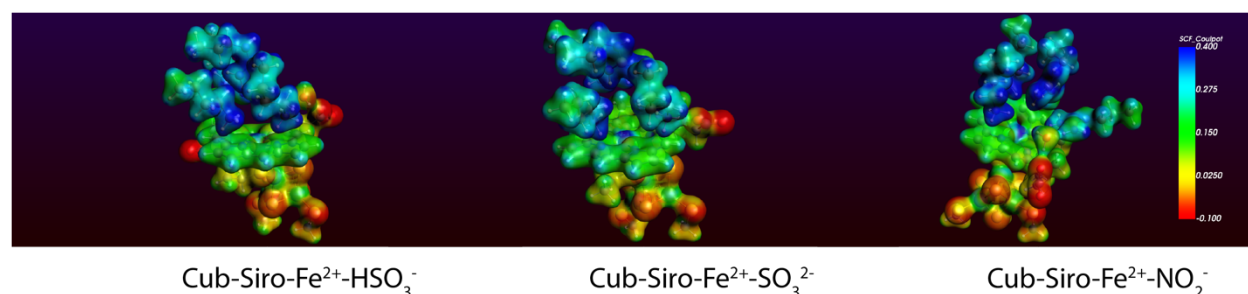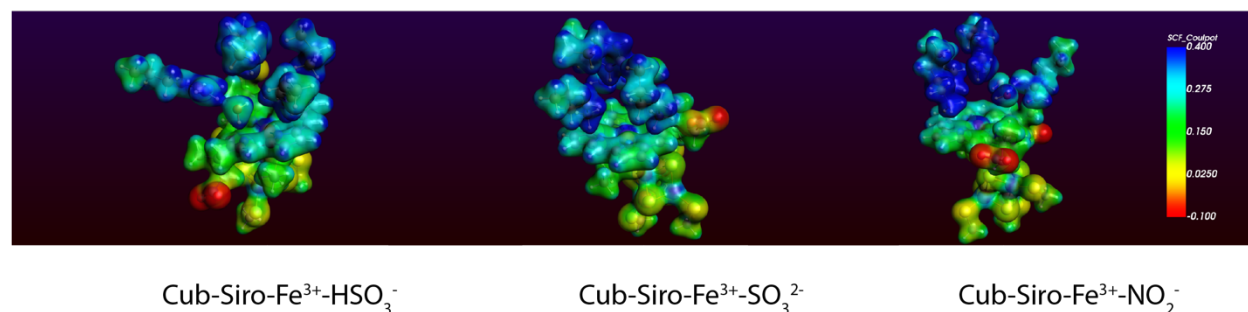

**Figure S7.** Plots of the electrostatic potential (plotted at the density for isovalue 0.03) for the Cub-Siro-Fe compounds.

**Table S4.** The cDFT descriptors for the Siro-Fe<sup>2+/3+</sup>-(HSO<sub>3</sub><sup>-</sup>, SO<sub>3</sub><sup>2-</sup>, NO<sub>2</sub><sup>-</sup>) pre-complexes with and without cubane.

|                        | Siro-Fe <sup>2+</sup> -(HSO <sub>3</sub> <sup>-</sup> ) | Cub-Siro-Fe <sup>2+</sup> -(HSO <sub>3</sub> <sup>-</sup> ) | Siro-Fe <sup>2+</sup> -(SO <sub>3</sub> <sup>2-</sup> ) | Cub-Siro-Fe <sup>2+</sup> -(SO <sub>3</sub> <sup>2-</sup> ) | Siro-Fe <sup>2+</sup> -(NO <sub>2</sub> <sup>-</sup> ) | Cub-Siro-Fe <sup>2+</sup> -(NO <sub>2</sub> <sup>-</sup> ) | Siro-Fe <sup>3+</sup> -(HSO <sub>3</sub> <sup>-</sup> ) | Cub-Siro-Fe <sup>3+</sup> -(HSO <sub>3</sub> <sup>-</sup> ) | Siro-Fe <sup>3+</sup> -(SO <sub>3</sub> <sup>2-</sup> ) | Cub-Siro-Fe <sup>3+</sup> -(SO <sub>3</sub> <sup>2-</sup> ) | Siro-Fe <sup>3+</sup> -(NO <sub>2</sub> <sup>-</sup> ) | Cub-Siro-Fe <sup>3+</sup> -(NO <sub>2</sub> <sup>-</sup> ) |
|------------------------|---------------------------------------------------------|-------------------------------------------------------------|---------------------------------------------------------|-------------------------------------------------------------|--------------------------------------------------------|------------------------------------------------------------|---------------------------------------------------------|-------------------------------------------------------------|---------------------------------------------------------|-------------------------------------------------------------|--------------------------------------------------------|------------------------------------------------------------|
| Hardness               | 0.039                                                   | 0.034                                                       | 0.042                                                   | 0.044                                                       | 0.033                                                  | 0.004                                                      | 0.057                                                   | 0.026                                                       | 0.053                                                   | 0.026                                                       | 0.053                                                  | 0.027                                                      |
| Softness               | 25.920                                                  | 29.352                                                      | 23.792                                                  | 22.681                                                      | 30.240                                                 | 247.732                                                    | 17.588                                                  | 38.826                                                      | 18.769                                                  | 38.799                                                      | 18.988                                                 | 36.585                                                     |
| Electrophilicity index | 0.251                                                   | 0.287                                                       | 0.236                                                   | 0.216                                                       | 0.292                                                  | 2.719                                                      | 0.354                                                   | 0.613                                                       | 0.380                                                   | 0.630                                                       | 0.395                                                  | 0.597                                                      |
| f <sup>+</sup> (Fe)    | 0.138                                                   | 0.002                                                       | 0.116                                                   | 0.003                                                       | 0.063                                                  | 0.510                                                      | 0.682                                                   | 0.309                                                       | 0.556                                                   | 0.057                                                       | 0.764                                                  | 0.029                                                      |
| f <sup>-</sup> (Fe)    | 0.693                                                   | 0.656                                                       | 0.656                                                   | 0.160                                                       | 0.558                                                  | 0.020                                                      | 0.002                                                   | 0.351                                                       | 0.002                                                   | 0.631                                                       | 0.020                                                  | 0.021                                                      |
| f <sup>0</sup> (Fe)    | 0.416                                                   | 0.329                                                       | 0.386                                                   | 0.082                                                       | 0.310                                                  | 0.265                                                      | 0.342                                                   | 0.330                                                       | 0.279                                                   | 0.344                                                       | 0.392                                                  | 0.025                                                      |
| f <sup>(2)</sup> (Fe)  | -0.555                                                  | -0.654                                                      | -0.540                                                  | -0.157                                                      | -0.494                                                 | 0.490                                                      | 0.681                                                   | -0.043                                                      | 0.554                                                   | -0.575                                                      | 0.744                                                  | 0.009                                                      |
| Mul. pop (Fe)          | 0.741                                                   | 0.765                                                       | 0.746                                                   | 0.754                                                       | 0.577                                                  | 0.622                                                      | 0.806                                                   | 0.785                                                       | 0.811                                                   | 0.764                                                       | 0.793                                                  | 0.773                                                      |
| Spin mul (Fe)          | 3.723                                                   | 3.778                                                       | 3.741                                                   | 3.779                                                       | 3.538                                                  | 2.659                                                      | 4.023                                                   | 3.957                                                       | 4.023                                                   | 3.821                                                       | 4.027                                                  | 3.808                                                      |

**Table S5.** The cDFT descriptors for the Siro-Fe<sup>2+/3+</sup>-(HSO<sub>3</sub><sup>-</sup>, SO<sub>3</sub><sup>2-</sup>, NO<sub>2</sub><sup>-</sup>) complexes with and without cubane.

|                        | Siro-Fe <sup>2+</sup> -HSO <sub>3</sub> <sup>-</sup> | Cub-Siro-Fe <sup>2+</sup> -HSO <sub>3</sub> <sup>-</sup> | Siro-Fe <sup>2+</sup> -SO <sub>3</sub> <sup>2-</sup> | Cub-Siro-Fe <sup>2+</sup> -SO <sub>3</sub> <sup>2-</sup> | Siro-Fe <sup>2+</sup> -NO <sub>2</sub> <sup>-</sup> | Cub-Siro-Fe <sup>2+</sup> -NO <sub>2</sub> <sup>-</sup> | Siro-Fe <sup>3+</sup> -HSO <sub>3</sub> <sup>-</sup> | Cub-Siro-Fe <sup>3+</sup> -HSO <sub>3</sub> <sup>-</sup> | Siro-Fe <sup>3+</sup> -SO <sub>3</sub> <sup>2-</sup> | Cub-Siro-Fe <sup>3+</sup> -SO <sub>3</sub> <sup>2-</sup> | Siro-Fe <sup>3+</sup> -NO <sub>2</sub> <sup>-</sup> | Cub-Siro-Fe <sup>3+</sup> -NO <sub>2</sub> <sup>-</sup> |
|------------------------|------------------------------------------------------|----------------------------------------------------------|------------------------------------------------------|----------------------------------------------------------|-----------------------------------------------------|---------------------------------------------------------|------------------------------------------------------|----------------------------------------------------------|------------------------------------------------------|----------------------------------------------------------|-----------------------------------------------------|---------------------------------------------------------|
| Hardness               | 0.039                                                | 0.025                                                    | 0.042                                                | 0.027                                                    | 0.050                                               | 0.033                                                   | 0.059                                                | 0.027                                                    | 0.057                                                | 0.022                                                    | 0.053                                               | 0.028                                                   |
| Softness               | 25.623                                               | 40.376                                                   | 23.746                                               | 36.423                                                   | 20.155                                              | 30.265                                                  | 17.014                                               | 37.555                                                   | 17.691                                               | 45.208                                                   | 18.925                                              | 35.297                                                  |
| Electrophilicity index | 0.174                                                | 0.301                                                    | 0.100                                                | 0.195                                                    | 0.197                                               | 0.283                                                   | 0.276                                                | 0.487                                                    | 0.212                                                | 0.467                                                    | 0.311                                               | 0.527                                                   |
| f <sup>+</sup> (Fe)    | 0.143                                                | 0.004                                                    | 0.121                                                | 0.005                                                    | 0.337                                               | 0.467                                                   | 0.691                                                | 0.444                                                    | 0.623                                                | 0.355                                                    | 0.764                                               | 0.640                                                   |
| f <sup>-</sup> (Fe)    | 0.681                                                | 0.690                                                    | 0.661                                                | 0.668                                                    | 0.105                                               | 0.019                                                   | 0.006                                                | 0.220                                                    | 0.028                                                | 0.338                                                    | 0.002                                               | 0.007                                                   |
| f <sup>0</sup> (Fe)    | 0.412                                                | 0.347                                                    | 0.391                                                | 0.336                                                    | 0.221                                               | 0.243                                                   | 0.348                                                | 0.332                                                    | 0.325                                                | 0.347                                                    | 0.383                                               | 0.324                                                   |
| f <sup>(2)</sup> (Fe)  | -0.538                                               | -0.686                                                   | -0.541                                               | -0.663                                                   | 0.232                                               | 0.448                                                   | 0.685                                                | 0.224                                                    | 0.595                                                | 0.017                                                    | 0.762                                               | 0.633                                                   |
| Mul. pop. (Fe)         | 0.643                                                | 0.701                                                    | 0.710                                                | 0.703                                                    | 0.689                                               | 0.766                                                   | 0.697                                                | 0.803                                                    | 0.712                                                | 0.672                                                    | 0.789                                               | 0.891                                                   |
| Spin pop (Fe)          | 3.721                                                | 3.780                                                    | 3.759                                                | 3.793                                                    | 3.143                                               | 2.685                                                   | 4.032                                                | 4.023                                                    | 4.054                                                | 3.993                                                    | 4.040                                               | 4.142                                                   |

**Table S6.** Cartesian coordinates (Å) of the siroheme species (Fe<sup>2+</sup> & Fe<sup>3+</sup>) with ligands (and without the cubane cluster) optimized at DFT (BP86 functional) using TZ2P basis sets. S is the spin state of the species.

| Siroheme (Fe <sup>2+</sup> ) with HSO <sub>3</sub> <sup>-</sup> |           |          |           |   |           |          |           |   |           |          |           |  |
|-----------------------------------------------------------------|-----------|----------|-----------|---|-----------|----------|-----------|---|-----------|----------|-----------|--|
| S=0                                                             |           |          | S=1       |   |           | S=2      |           |   |           |          |           |  |
| C                                                               | 50.428910 | 4.480310 | 71.588390 | C | 50.428910 | 4.480310 | 71.588390 | C | 50.428910 | 4.480310 | 71.588390 |  |
| C                                                               | 51.175271 | 5.729258 | 71.116538 | C | 51.096387 | 5.768813 | 71.106263 | C | 51.281519 | 5.659546 | 71.116010 |  |
| C                                                               | 50.587933 | 6.288025 | 69.817141 | C | 50.454221 | 6.292275 | 69.818135 | C | 50.771782 | 6.234574 | 69.790749 |  |
| N                                                               | 51.254217 | 7.509463 | 69.361399 | N | 51.062705 | 7.529239 | 69.326368 | N | 51.516079 | 7.413905 | 69.346079 |  |
| C                                                               | 52.419768 | 7.552660 | 68.702340 | C | 52.224009 | 7.601229 | 68.662750 | C | 52.699753 | 7.396257 | 68.721819 |  |
| N                                                               | 52.947428 | 6.441802 | 68.147537 | N | 52.814265 | 6.493056 | 68.173088 | N | 53.201990 | 6.249865 | 68.217007 |  |
| N                                                               | 53.105165 | 8.690604 | 68.603277 | N | 52.837641 | 8.770428 | 68.494331 | N | 53.432217 | 8.505448 | 68.613359 |  |
| C                                                               | 52.322910 | 2.353310 | 63.305390 | C | 52.322910 | 2.353310 | 63.305390 | C | 52.322910 | 2.353310 | 63.305390 |  |
| C                                                               | 53.829885 | 2.456438 | 63.548808 | C | 53.840914 | 2.430532 | 63.476079 | C | 53.834217 | 2.259685 | 63.523883 |  |
| C                                                               | 54.143630 | 2.519316 | 65.053903 | C | 54.225183 | 2.464097 | 64.964903 | C | 54.182088 | 2.285077 | 65.025168 |  |
| N                                                               | 55.454449 | 3.092325 | 65.367816 | N | 55.551213 | 3.025281 | 65.227236 | N | 55.500344 | 2.853391 | 65.321526 |  |
| C                                                               | 55.716309 | 4.401092 | 65.227732 | C | 55.810976 | 4.337586 | 65.117154 | C | 55.758700 | 4.157184 | 65.160937 |  |
| N                                                               | 54.751357 | 5.221915 | 64.831113 | N | 54.829190 | 5.169171 | 64.778427 | N | 54.790540 | 4.972179 | 64.759913 |  |
| N                                                               | 56.959315 | 4.881410 | 65.426910 | N | 57.056161 | 4.816514 | 65.287170 | N | 57.006232 | 4.643393 | 65.333103 |  |
| C                                                               | 57.721910 | 3.753310 | 61.692390 | C | 57.721910 | 3.753310 | 61.692390 | C | 57.721910 | 3.753310 | 61.692390 |  |
| C                                                               | 57.681910 | 4.934310 | 60.688390 | C | 57.681910 | 4.934310 | 60.688390 | C | 57.681910 | 4.934310 | 60.688390 |  |
| C                                                               | 57.222491 | 6.247312 | 61.342927 | C | 56.959725 | 6.176945 | 61.211294 | C | 57.255049 | 6.255030 | 61.345635 |  |
| C                                                               | 58.114124 | 6.614529 | 62.518793 | C | 57.784917 | 6.953865 | 62.227195 | C | 58.175004 | 6.633589 | 62.497924 |  |
| N                                                               | 57.680793 | 7.864801 | 63.206088 | N | 57.126982 | 8.250530 | 62.539890 | N | 57.717332 | 7.864253 | 63.203102 |  |
| C                                                               | 51.935910 | 3.947310 | 59.008390 | C | 51.935910 | 3.947310 | 59.008390 | C | 51.935910 | 3.947310 | 59.008390 |  |

|    |           |           |           |    |           |           |           |    |           |           |           |
|----|-----------|-----------|-----------|----|-----------|-----------|-----------|----|-----------|-----------|-----------|
| C  | 52.628910 | 4.440310  | 60.285390 | C  | 52.628910 | 4.440310  | 60.285390 | C  | 52.628910 | 4.440310  | 60.285390 |
| C  | 52.074480 | 5.784331  | 60.766786 | C  | 52.116942 | 5.820953  | 60.709784 | C  | 52.025031 | 5.739649  | 60.829486 |
| C  | 52.727841 | 6.242648  | 62.061156 | C  | 52.735591 | 6.299503  | 62.013088 | C  | 52.718937 | 6.186699  | 62.107445 |
| N  | 52.113569 | 7.505330  | 62.571100 | N  | 52.140574 | 7.597282  | 62.455252 | N  | 52.077645 | 7.401354  | 62.700288 |
| Fe | 54.427678 | 10.745899 | 64.984905 | Fe | 54.327866 | 10.914184 | 65.019259 | Fe | 54.454916 | 11.248431 | 65.012367 |
| C  | 57.733478 | 10.610171 | 65.738228 | C  | 57.593482 | 10.451721 | 65.898875 | C  | 57.830191 | 10.813527 | 65.671603 |
| C  | 53.783818 | 11.837319 | 68.110722 | C  | 53.646013 | 11.929605 | 68.141061 | C  | 53.918789 | 11.752752 | 68.303279 |
| C  | 51.084962 | 10.554200 | 64.336571 | C  | 51.007570 | 10.599316 | 64.325877 | C  | 51.109122 | 10.585333 | 64.545680 |
| C  | 55.133452 | 10.561906 | 61.636719 | C  | 55.140101 | 10.832044 | 61.705005 | C  | 55.064808 | 10.466048 | 61.658031 |
| N  | 55.506656 | 10.965503 | 66.635694 | N  | 55.360747 | 10.972840 | 66.712673 | N  | 55.655773 | 11.110083 | 66.708668 |
| C  | 56.849410 | 10.646135 | 66.781415 | C  | 56.676992 | 10.516594 | 66.898302 | C  | 57.007499 | 10.835040 | 66.772782 |
| C  | 57.206239 | 10.563690 | 68.265584 | C  | 56.952986 | 10.380688 | 68.393004 | C  | 57.427180 | 10.701022 | 68.240592 |
| C  | 56.702529 | 9.277015  | 68.961722 | C  | 56.326537 | 9.132032  | 69.057796 | C  | 56.998619 | 9.358607  | 68.883546 |
| C  | 58.684557 | 10.779749 | 68.577234 | C  | 58.429860 | 10.472002 | 68.766921 | C  | 58.906732 | 10.958900 | 68.508880 |
| C  | 59.712387 | 9.661015  | 68.256696 | C  | 59.362870 | 9.267038  | 68.493335 | C  | 59.960763 | 9.889363  | 68.105626 |
| O  | 59.353109 | 8.548578  | 67.717227 | O  | 58.953978 | 8.222626  | 67.852590 | O  | 59.623269 | 8.789144  | 67.528062 |
| O  | 60.894649 | 9.923955  | 68.574964 | O  | 60.524319 | 9.375619  | 68.941259 | O  | 61.142910 | 10.180530 | 68.398941 |
| C  | 56.261778 | 11.698059 | 68.744334 | C  | 56.091620 | 11.588252 | 68.859337 | C  | 56.444223 | 11.758815 | 68.823955 |
| C  | 55.093048 | 11.512973 | 67.804723 | C  | 54.946970 | 11.526654 | 67.872433 | C  | 55.243057 | 11.550571 | 67.924372 |
| N  | 52.757094 | 11.004997 | 66.061204 | N  | 52.647885 | 11.094231 | 66.076611 | N  | 52.774593 | 11.030938 | 66.271970 |
| C  | 52.693471 | 11.538217 | 67.309418 | C  | 52.566636 | 11.641245 | 67.311701 | C  | 52.775253 | 11.472189 | 67.545804 |
| C  | 51.256560 | 11.825071 | 67.737309 | C  | 51.118027 | 11.917884 | 67.710707 | C  | 51.352307 | 11.716137 | 68.047221 |
| C  | 50.949993 | 11.550760 | 69.208813 | C  | 50.791970 | 11.678871 | 69.184109 | C  | 51.102970 | 11.309172 | 69.497879 |
| C  | 50.976577 | 13.319968 | 67.402765 | C  | 50.824229 | 13.399260 | 67.333169 | C  | 51.080524 | 13.238138 | 67.856629 |
| C  | 49.515667 | 13.722040 | 67.710091 | C  | 49.362662 | 13.801960 | 67.636220 | C  | 49.643841 | 13.622981 | 68.282269 |
| O  | 49.309939 | 14.361085 | 68.783185 | O  | 49.162023 | 14.487890 | 68.680777 | O  | 49.509793 | 14.148629 | 69.425499 |
| O  | 48.636608 | 13.353764 | 66.871508 | O  | 48.479529 | 13.389179 | 66.823436 | O  | 48.714727 | 13.351986 | 67.462111 |
| C  | 50.496094 | 10.897594 | 66.772574 | C  | 50.382667 | 10.954058 | 66.758344 | C  | 50.542335 | 10.886744 | 67.024275 |
| C  | 51.460145 | 10.773806 | 65.629133 | C  | 51.348605 | 10.835047 | 65.616543 | C  | 51.481658 | 10.806619 | 65.847958 |
| N  | 53.325477 | 10.555033 | 63.312373 | N  | 53.280564 | 10.636897 | 63.332108 | N  | 53.312829 | 10.575628 | 63.391839 |
| C  | 51.958612 | 10.512387 | 63.232699 | C  | 51.900280 | 10.560846 | 63.223102 | C  | 51.941108 | 10.503746 | 63.396745 |
| C  | 51.545824 | 10.397419 | 61.861249 | C  | 51.531810 | 10.451654 | 61.862447 | C  | 51.469639 | 10.301962 | 62.055494 |
| C  | 52.695350 | 10.356011 | 61.096716 | C  | 52.718282 | 10.445632 | 61.114479 | C  | 52.584889 | 10.217160 | 61.234158 |
| C  | 53.800084 | 10.469747 | 62.006762 | C  | 53.795260 | 10.606331 | 62.040270 | C  | 53.735307 | 10.400985 | 62.077389 |
| N  | 56.103866 | 10.666073 | 63.895381 | N  | 56.049414 | 10.741246 | 63.991323 | N  | 56.149042 | 10.721296 | 63.857477 |
| C  | 56.202243 | 10.700127 | 62.510009 | C  | 56.185944 | 10.981895 | 62.628064 | C  | 56.186195 | 10.665701 | 62.474709 |
| C  | 57.579502 | 10.836754 | 62.123589 | C  | 57.566776 | 11.178739 | 62.323865 | C  | 57.546518 | 10.807857 | 62.036243 |
| C  | 58.317391 | 10.873192 | 63.291091 | C  | 58.280804 | 10.962904 | 63.508887 | C  | 58.326643 | 10.943131 | 63.177724 |
| C  | 57.383981 | 10.749304 | 64.374092 | C  | 57.321403 | 10.712581 | 64.526792 | C  | 57.436335 | 10.875630 | 64.299242 |
| S  | 54.319962 | 8.617640  | 65.102340 | S  | 54.189106 | 8.573009  | 65.119953 | S  | 54.452217 | 8.342708  | 65.136656 |
| O  | 55.103118 | 7.813192  | 64.064044 | O  | 54.969696 | 7.822746  | 64.053222 | O  | 55.114717 | 7.593265  | 63.986453 |
| O  | 52.923503 | 8.018019  | 65.130658 | O  | 52.781866 | 8.025854  | 65.120824 | O  | 53.047192 | 7.790698  | 65.279007 |
| O  | 54.888233 | 7.889942  | 66.551317 | O  | 54.757670 | 7.913392  | 66.517152 | O  | 55.164838 | 7.589191  | 66.505287 |
| C  | 52.934910 | 13.851310 | 62.600390 | C  | 52.934910 | 13.851310 | 62.600390 | C  | 52.934910 | 13.851310 | 62.600390 |
| C  | 52.981630 | 13.681093 | 64.114347 | C  | 52.924673 | 13.714589 | 64.120828 | C  | 52.840023 | 13.935156 | 64.117895 |
| S  | 54.576735 | 13.043577 | 64.745815 | S  | 54.492497 | 13.055879 | 64.785251 | S  | 54.429142 | 13.556287 | 64.964786 |
| H  | 54.952579 | 6.213257  | 64.590072 | H  | 55.014020 | 6.164737  | 64.573644 | H  | 54.994845 | 5.955825  | 64.504525 |
| H  | 50.859949 | 4.098561  | 72.521787 | H  | 50.894426 | 4.123396  | 72.515136 | H  | 50.805035 | 4.084113  | 72.539366 |
| H  | 50.483889 | 3.677547  | 70.839955 | H  | 50.518292 | 3.681644  | 70.838649 | H  | 50.440189 | 3.661159  | 70.855580 |
| H  | 49.367815 | 4.697171  | 71.771864 | H  | 49.359740 | 4.636387  | 71.787745 | H  | 49.383547 | 4.782682  | 71.739612 |
| H  | 51.127511 | 6.511794  | 71.887259 | H  | 51.020106 | 6.548382  | 71.877732 | H  | 51.270967 | 6.459331  | 71.870508 |
| H  | 52.239281 | 5.501338  | 70.959377 | H  | 52.168330 | 5.598993  | 70.929980 | H  | 52.329582 | 5.349486  | 70.994531 |
| H  | 50.625218 | 5.535635  | 69.017926 | H  | 50.492799 | 5.531095  | 69.026213 | H  | 50.793945 | 5.472260  | 68.999933 |
| H  | 49.529216 | 6.540835  | 69.950098 | H  | 49.391628 | 6.509846  | 69.977607 | H  | 49.724754 | 6.546230  | 69.885141 |
| H  | 53.730810 | 6.623947  | 67.511569 | H  | 53.589749 | 6.667224  | 67.527814 | H  | 53.998033 | 6.379643  | 67.586677 |
| H  | 52.309738 | 5.717158  | 67.830554 | H  | 52.230682 | 5.696542  | 67.940771 | H  | 52.546163 | 5.531726  | 67.922162 |
| H  | 53.849574 | 8.739610  | 67.901240 | H  | 53.607579 | 8.826347  | 67.826588 | H  | 54.188019 | 8.502523  | 67.923959 |
| H  | 52.779941 | 9.558520  | 69.014460 | H  | 52.491662 | 9.636522  | 68.892399 | H  | 53.113222 | 9.407327  | 68.954736 |

|   |           |           |           |   |           |           |           |   |           |           |           |
|---|-----------|-----------|-----------|---|-----------|-----------|-----------|---|-----------|-----------|-----------|
| H | 52.098515 | 2.145828  | 62.253601 | H | 52.043391 | 2.161861  | 62.263641 | H | 52.056904 | 2.182954  | 62.256917 |
| H | 51.811411 | 3.281528  | 63.594058 | H | 51.843152 | 3.286552  | 63.628543 | H | 51.939300 | 3.336357  | 63.608796 |
| H | 54.224918 | 3.355434  | 63.055177 | H | 54.225092 | 3.332419  | 62.979624 | H | 54.332259 | 3.098531  | 63.019340 |
| H | 54.357109 | 1.600713  | 63.106088 | H | 54.333207 | 1.574693  | 62.995090 | H | 54.236033 | 1.342647  | 63.074023 |
| H | 54.125205 | 1.516032  | 65.490802 | H | 54.219643 | 1.453466  | 65.385503 | H | 54.173940 | 1.274131  | 65.443115 |
| H | 53.365633 | 3.095872  | 65.578181 | H | 53.476225 | 3.036157  | 65.534682 | H | 53.419251 | 2.852818  | 65.580187 |
| H | 53.768053 | 4.958284  | 64.910122 | H | 53.846511 | 4.907509  | 64.879822 | H | 53.806763 | 4.728425  | 64.894875 |
| H | 57.686187 | 4.248044  | 65.738156 | H | 57.790465 | 4.172664  | 65.557845 | H | 57.740536 | 4.022036  | 65.651506 |
| H | 57.093695 | 5.873804  | 65.658460 | H | 57.178545 | 5.804090  | 65.578521 | H | 57.116073 | 5.624624  | 65.582945 |
| H | 57.909314 | 2.806955  | 61.170059 | H | 58.233921 | 2.887594  | 61.255061 | H | 57.894053 | 2.805004  | 61.168328 |
| H | 56.762329 | 3.660422  | 62.221591 | H | 56.702439 | 3.445153  | 61.964050 | H | 56.767202 | 3.670699  | 62.231976 |
| H | 58.512752 | 3.877002  | 62.441854 | H | 58.247153 | 4.025292  | 62.617265 | H | 58.521489 | 3.869584  | 62.433626 |
| H | 58.677304 | 5.073553  | 60.241790 | H | 58.706012 | 5.206399  | 60.392121 | H | 58.670970 | 5.055416  | 60.222522 |
| H | 56.996514 | 4.694570  | 59.864689 | H | 57.175738 | 4.597598  | 59.772931 | H | 56.978100 | 4.703218  | 59.877685 |
| H | 56.186430 | 6.134077  | 61.701544 | H | 55.992728 | 5.891486  | 61.656696 | H | 56.227935 | 6.152881  | 61.732462 |
| H | 57.219300 | 7.061152  | 60.603766 | H | 56.736007 | 6.846982  | 60.367091 | H | 57.236838 | 7.063187  | 60.600455 |
| H | 59.154583 | 6.755252  | 62.204014 | H | 58.780675 | 7.175052  | 61.826375 | H | 59.202785 | 6.802463  | 62.157662 |
| H | 58.091926 | 5.828716  | 63.280503 | H | 57.908128 | 6.409369  | 63.170223 | H | 58.193992 | 5.838969  | 63.250951 |
| H | 57.885217 | 8.733221  | 62.671221 | H | 56.807253 | 8.734651  | 61.690452 | H | 57.931300 | 8.746338  | 62.696955 |
| H | 58.159860 | 7.942022  | 64.116403 | H | 57.760000 | 8.935036  | 63.009093 | H | 58.135107 | 7.922057  | 64.154512 |
| H | 52.349548 | 2.985263  | 58.680626 | H | 52.311611 | 2.960834  | 58.708258 | H | 52.392803 | 3.017105  | 58.647939 |
| H | 52.062422 | 4.666717  | 58.187957 | H | 52.106479 | 4.641679  | 58.174490 | H | 52.009313 | 4.693679  | 58.205822 |
| H | 50.858020 | 3.812875  | 59.174317 | H | 50.850872 | 3.863792  | 59.159957 | H | 50.869763 | 3.752227  | 59.189621 |
| H | 53.711318 | 4.536468  | 60.107870 | H | 53.717634 | 4.484812  | 60.127933 | H | 53.700170 | 4.598486  | 60.085412 |
| H | 52.509308 | 3.695838  | 61.081223 | H | 52.458946 | 3.726233  | 61.099678 | H | 52.571269 | 3.665913  | 61.059294 |
| H | 50.988080 | 5.691287  | 60.926933 | H | 51.022658 | 5.774303  | 60.832158 | H | 50.952890 | 5.587139  | 61.033268 |
| H | 52.217226 | 6.550097  | 59.989164 | H | 52.316170 | 6.555148  | 59.914314 | H | 52.096870 | 6.534305  | 60.071635 |
| H | 53.798412 | 6.441479  | 61.940644 | H | 53.815319 | 6.462217  | 61.928622 | H | 53.771295 | 6.440479  | 61.942544 |
| H | 52.605069 | 5.493790  | 62.852158 | H | 52.561896 | 5.580775  | 62.822863 | H | 52.672555 | 5.403505  | 62.872594 |
| H | 52.286032 | 8.324194  | 61.949072 | H | 52.414074 | 8.412525  | 61.857019 | H | 52.202831 | 8.259154  | 62.113906 |
| H | 52.465951 | 7.764682  | 63.539945 | H | 52.404856 | 7.836932  | 63.447688 | H | 52.460812 | 7.620403  | 63.659226 |
| H | 58.791321 | 10.491266 | 65.961857 | H | 58.625597 | 10.219986 | 66.154280 | H | 58.900175 | 10.720589 | 65.848757 |
| H | 53.595369 | 12.313119 | 69.071140 | H | 53.446383 | 12.401963 | 69.100125 | H | 53.757540 | 12.150926 | 69.304240 |
| H | 50.019473 | 10.462550 | 64.130318 | H | 49.947848 | 10.477594 | 64.102296 | H | 50.039757 | 10.481374 | 64.359615 |
| H | 55.357336 | 10.545339 | 60.570263 | H | 55.379094 | 10.939423 | 60.647254 | H | 55.246380 | 10.385162 | 60.586008 |
| H | 57.211823 | 8.381516  | 68.604235 | H | 56.741181 | 8.197815  | 68.676738 | H | 57.537760 | 8.504725  | 68.474308 |
| H | 55.623206 | 9.156303  | 68.835222 | H | 55.241064 | 9.121806  | 68.937163 | H | 55.922269 | 9.197571  | 68.771621 |
| H | 56.901351 | 9.372395  | 70.038039 | H | 56.535736 | 9.177992  | 70.135609 | H | 57.213883 | 9.410923  | 69.959586 |
| H | 59.047985 | 11.691643 | 68.081621 | H | 58.891796 | 11.343200 | 68.279287 | H | 59.219983 | 11.900533 | 68.034846 |
| H | 58.790348 | 10.966316 | 69.656347 | H | 58.509679 | 10.658070 | 69.847904 | H | 59.049263 | 11.108140 | 69.589599 |
| H | 51.141590 | 10.501184 | 69.476915 | H | 51.012375 | 10.646932 | 69.496851 | H | 51.350519 | 10.250592 | 69.667260 |
| H | 49.891469 | 11.749189 | 69.415350 | H | 49.723375 | 11.848446 | 69.363584 | H | 50.046706 | 11.446292 | 69.758032 |
| H | 51.537819 | 12.188738 | 69.879547 | H | 51.345717 | 12.357587 | 69.843626 | H | 51.694279 | 11.909136 | 70.199888 |
| H | 51.184423 | 13.480603 | 66.336951 | H | 51.020636 | 13.527129 | 66.260664 | H | 51.237031 | 13.486944 | 66.797975 |
| H | 51.665142 | 13.941012 | 67.989407 | H | 51.511682 | 14.044368 | 67.894448 | H | 51.806610 | 13.799427 | 68.457664 |
| H | 50.344783 | 9.908388  | 67.239392 | H | 50.254956 | 9.971452  | 67.246827 | H | 50.354520 | 9.872957  | 67.419904 |
| H | 50.513059 | 10.369216 | 61.524890 | H | 50.510515 | 10.387124 | 61.496535 | H | 50.424666 | 10.232937 | 61.763605 |
| H | 52.784680 | 10.302439 | 60.015570 | H | 52.825867 | 10.435721 | 60.033339 | H | 52.610193 | 10.080533 | 60.156454 |
| H | 57.933000 | 10.918243 | 61.099673 | H | 57.965426 | 11.381080 | 61.333385 | H | 57.875223 | 10.827317 | 61.000485 |
| H | 59.393097 | 10.970344 | 63.406313 | H | 59.353742 | 11.026955 | 63.667418 | H | 59.404844 | 11.063516 | 63.236931 |
| H | 55.899075 | 7.851979  | 66.530047 | H | 55.815029 | 7.800098  | 66.460060 | H | 56.174592 | 7.728140  | 66.451747 |
| H | 53.096872 | 12.893636 | 62.094201 | H | 53.042700 | 12.877609 | 62.115818 | H | 53.254906 | 12.851964 | 62.287488 |
| H | 52.184516 | 13.007721 | 64.448820 | H | 52.108779 | 13.061985 | 64.449347 | H | 52.081880 | 13.235637 | 64.494218 |
| H | 52.812045 | 14.646285 | 64.612725 | H | 52.785255 | 14.693459 | 64.600457 | H | 52.539468 | 14.942833 | 64.435300 |
| H | 50.947329 | 8.379558  | 69.786037 | H | 50.704293 | 8.400271  | 69.705537 | H | 51.228691 | 8.306966  | 69.736259 |
| H | 56.161382 | 2.502231  | 65.790200 | H | 56.276827 | 2.422645  | 65.596955 | H | 56.207777 | 2.267906  | 65.750050 |
| H | 56.650409 | 7.880888  | 63.444873 | H | 56.269936 | 8.147174  | 63.151184 | H | 56.680138 | 7.847956  | 63.384953 |
| H | 51.094666 | 7.412949  | 62.636736 | H | 51.116597 | 7.560288  | 62.421946 | H | 51.065814 | 7.269524  | 62.798827 |

|   |           |           |           |   |           |           |           |   |           |           |           |
|---|-----------|-----------|-----------|---|-----------|-----------|-----------|---|-----------|-----------|-----------|
| H | 51.959207 | 14.251818 | 62.281748 | H | 51.992717 | 14.306988 | 62.261376 | H | 51.958276 | 14.062610 | 62.138142 |
| H | 53.716295 | 14.546233 | 62.263289 | H | 53.762479 | 14.493056 | 62.269701 | H | 53.662482 | 14.578330 | 62.214378 |
| O | 51.969607 | 5.504782  | 65.447264 | O | 52.033482 | 5.425716  | 65.378798 | O | 52.067338 | 5.278243  | 65.568422 |
| H | 52.247174 | 6.462006  | 65.422147 | H | 52.234047 | 6.400979  | 65.359527 | H | 52.346521 | 6.233833  | 65.545410 |
| H | 51.020991 | 5.495099  | 65.236546 | H | 51.092143 | 5.345378  | 65.152098 | H | 51.115075 | 5.270743  | 65.375094 |
| O | 57.546089 | 7.748018  | 66.127978 | O | 57.242655 | 7.538295  | 66.187195 | O | 57.756034 | 7.954927  | 66.018454 |
| H | 57.399262 | 8.671899  | 65.798225 | H | 57.375974 | 8.270342  | 65.548068 | H | 57.534054 | 8.896037  | 65.783698 |
| H | 58.253485 | 8.010569  | 66.857803 | H | 57.911661 | 7.870659  | 66.970870 | H | 58.501869 | 8.210748  | 66.710314 |
| H | 51.883750 | 1.537267  | 63.896950 | H | 51.900005 | 1.537067  | 63.908443 | H | 51.791732 | 1.596540  | 63.900019 |
| H | 55.986740 | 11.622704 | 69.802804 | H | 55.771099 | 11.520429 | 69.905480 | H | 56.228405 | 11.616257 | 69.888963 |
| H | 56.719690 | 12.684843 | 68.564760 | H | 56.643742 | 12.532095 | 68.717063 | H | 56.838054 | 12.777527 | 68.674877 |
| H | 49.524004 | 11.310940 | 66.482882 | H | 49.400436 | 11.338736 | 66.463727 | H | 49.580005 | 11.356439 | 66.791942 |

**Siroheme (Fe<sup>3+</sup>) with HSO<sub>3</sub><sup>-</sup>**

| <b>S=1/2</b> |           |           | <b>S=3/2</b> |    |           | <b>S=5/2</b> |           |    |           |           |           |
|--------------|-----------|-----------|--------------|----|-----------|--------------|-----------|----|-----------|-----------|-----------|
| C            | 50.428910 | 4.480310  | 71.588390    | C  | 50.428910 | 4.480310     | 71.588390 | C  | 50.428910 | 4.480310  | 71.588390 |
| C            | 51.154086 | 5.796995  | 71.311293    | C  | 51.544341 | 5.474620     | 71.258868 | C  | 51.456976 | 5.573305  | 71.295666 |
| C            | 52.099817 | 5.694385  | 70.118169    | C  | 51.195917 | 6.326174     | 70.034664 | C  | 50.975694 | 6.499261  | 70.175184 |
| N            | 52.798253 | 6.967238  | 69.924186    | N  | 52.155944 | 7.398325     | 69.781233 | N  | 51.896512 | 7.592614  | 69.865579 |
| C            | 53.680759 | 7.211890  | 68.953912    | C  | 53.191524 | 7.369718     | 68.936959 | C  | 52.889815 | 7.530964  | 68.975552 |
| N            | 53.930005 | 6.302026  | 67.995902    | N  | 53.479051 | 6.297866     | 68.182217 | N  | 53.185880 | 6.369506  | 68.357845 |
| N            | 54.387965 | 8.354167  | 68.937029    | N  | 54.022004 | 8.426731     | 68.852661 | N  | 53.589700 | 8.619060  | 68.652023 |
| C            | 52.322910 | 2.353310  | 63.305390    | C  | 52.322910 | 2.353310     | 63.305390 | C  | 52.322910 | 2.353310  | 63.305390 |
| C            | 53.831949 | 2.435747  | 63.531255    | C  | 53.836802 | 2.267017     | 63.492018 | C  | 53.841624 | 2.320692  | 63.481325 |
| C            | 54.155114 | 2.500671  | 65.030717    | C  | 54.201315 | 2.202792     | 64.985322 | C  | 54.219124 | 2.225884  | 64.969236 |
| N            | 55.518106 | 2.946650  | 65.324546    | N  | 55.563042 | 2.649350     | 65.279748 | N  | 55.578838 | 2.683443  | 65.268184 |
| C            | 55.921021 | 4.216851  | 65.172996    | C  | 55.931582 | 3.937228     | 65.187912 | C  | 55.928341 | 3.972374  | 65.201742 |
| N            | 55.036079 | 5.148727  | 64.823940    | N  | 55.017779 | 4.860644     | 64.909493 | N  | 55.006817 | 4.897868  | 64.967946 |
| N            | 57.214902 | 4.547493  | 65.329318    | N  | 57.221637 | 4.292460     | 65.329513 | N  | 57.222588 | 4.345519  | 65.316045 |
| C            | 57.721910 | 3.753310  | 61.692390    | C  | 57.721910 | 3.753310     | 61.692390 | C  | 57.721910 | 3.753310  | 61.692390 |
| C            | 57.681910 | 4.934310  | 60.688390    | C  | 57.681910 | 4.934310     | 60.688390 | C  | 57.681910 | 4.934310  | 60.688390 |
| C            | 57.316383 | 6.270006  | 61.354828    | C  | 57.300028 | 6.258937     | 61.374044 | C  | 57.354770 | 6.269785  | 61.375268 |
| C            | 58.252404 | 6.605638  | 62.509298    | C  | 58.207304 | 6.568971     | 62.560116 | C  | 58.312320 | 6.564166  | 62.522980 |
| N            | 57.871132 | 7.875874  | 63.193288    | N  | 57.769943 | 7.786294     | 63.305556 | N  | 57.924210 | 7.800100  | 63.267131 |
| C            | 51.935910 | 3.947310  | 59.008390    | C  | 51.935910 | 3.947310     | 59.008390 | C  | 51.935910 | 3.947310  | 59.008390 |
| C            | 52.628910 | 4.440310  | 60.285390    | C  | 52.628910 | 4.440310     | 60.285390 | C  | 52.628910 | 4.440310  | 60.285390 |
| C            | 52.071857 | 5.766725  | 60.807944    | C  | 52.016258 | 5.717946     | 60.863414 | C  | 51.956556 | 5.656011  | 60.932074 |
| C            | 52.775956 | 6.201426  | 62.085107    | C  | 52.729088 | 6.142249     | 62.138994 | C  | 52.733386 | 6.120083  | 62.156540 |
| N            | 52.201325 | 7.464815  | 62.637267    | N  | 52.129575 | 7.372961     | 62.738195 | N  | 52.054009 | 7.258491  | 62.855603 |
| Fe           | 54.622748 | 10.846929 | 64.731832    | Fe | 54.679599 | 11.040090    | 64.782688 | Fe | 54.693000 | 11.332214 | 64.932293 |
| C            | 58.004637 | 10.970641 | 65.368979    | C  | 58.000403 | 10.894129    | 65.704045 | C  | 58.031304 | 10.842016 | 65.754628 |
| C            | 53.977890 | 11.337884 | 67.992928    | C  | 53.823218 | 11.513752    | 68.023928 | C  | 54.041912 | 11.897732 | 68.211591 |
| C            | 51.256938 | 10.503047 | 64.110417    | C  | 51.374604 | 10.520027    | 63.993495 | C  | 51.352751 | 10.574068 | 64.412070 |
| C            | 55.276250 | 10.504607 | 61.368564    | C  | 55.557849 | 10.567822    | 61.498870 | C  | 55.401072 | 10.533056 | 61.669757 |
| N            | 55.797580 | 11.055139 | 66.389229    | N  | 55.738495 | 11.095127    | 66.564249 | N  | 55.815905 | 11.171553 | 66.705198 |
| C            | 57.176348 | 11.065222 | 66.445368    | C  | 57.108232 | 11.008543    | 66.725225 | C  | 57.163918 | 10.887658 | 66.818202 |
| C            | 57.686570 | 11.203463 | 67.883409    | C  | 57.501422 | 11.068563    | 68.203355 | C  | 57.533337 | 10.792067 | 68.300600 |
| C            | 58.204681 | 9.847546  | 68.396325    | C  | 57.781344 | 9.646626     | 68.725298 | C  | 57.074184 | 9.466696  | 68.956430 |
| C            | 58.696894 | 12.349264 | 68.082148    | C  | 58.632331 | 12.059348    | 68.534376 | C  | 59.006280 | 11.042749 | 68.605832 |
| C            | 60.125414 | 12.196143 | 67.609030    | C  | 60.070965 | 11.704760    | 68.224581 | C  | 60.056525 | 9.957314  | 68.233470 |
| O            | 60.877641 | 13.319561 | 67.750324    | O  | 60.965375 | 12.661265    | 68.591611 | O  | 59.712098 | 8.855330  | 67.663235 |
| O            | 60.649536 | 11.196035 | 67.160848    | O  | 60.485590 | 10.685166    | 67.710136 | O  | 61.234428 | 10.241454 | 68.540627 |
| C            | 56.390798 | 11.586392 | 68.624096    | C  | 56.200017 | 11.613558    | 68.823944 | C  | 56.542712 | 11.871985 | 68.823120 |
| C            | 55.306053 | 11.307444 | 67.624552    | C  | 55.171942 | 11.392321    | 67.754882 | C  | 55.373002 | 11.658725 | 67.890351 |
| N            | 52.932727 | 10.827790 | 65.854733    | N  | 52.919822 | 10.953046    | 65.829737 | N  | 52.974438 | 11.124801 | 66.153795 |
| C            | 52.889751 | 11.074153 | 67.184776    | C  | 52.787990 | 11.267516    | 67.141651 | C  | 52.930247 | 11.600964 | 67.422210 |
| C            | 51.472198 | 11.118884 | 67.734332    | C  | 51.334721 | 11.391336    | 67.566872 | C  | 51.498013 | 11.839657 | 67.881270 |
| C            | 51.297702 | 10.322996 | 69.030719    | C  | 51.017564 | 10.739808    | 68.913223 | C  | 51.208043 | 11.400614 | 69.316392 |
| C            | 51.112293 | 12.617000 | 67.934137    | C  | 51.025190 | 12.915928    | 67.587855 | C  | 51.247709 | 13.367558 | 67.706628 |

|   |           |           |           |   |           |           |           |   |           |           |           |
|---|-----------|-----------|-----------|---|-----------|-----------|-----------|---|-----------|-----------|-----------|
| C | 49.666267 | 12.792331 | 68.457166 | C | 49.537459 | 13.188309 | 67.932842 | C | 49.770128 | 13.734645 | 68.005766 |
| O | 49.534538 | 13.010453 | 69.695844 | O | 49.288001 | 13.524897 | 69.124649 | O | 49.523584 | 14.186483 | 69.158249 |
| O | 48.736686 | 12.669909 | 67.604213 | O | 48.703577 | 13.020687 | 66.994237 | O | 48.940507 | 13.518498 | 67.073022 |
| C | 50.685490 | 10.509442 | 66.563207 | C | 50.626677 | 10.692180 | 66.394797 | C | 50.710329 | 11.026712 | 66.831707 |
| C | 51.640450 | 10.609735 | 65.413005 | C | 51.661621 | 10.707543 | 65.312340 | C | 51.693505 | 10.873912 | 65.706418 |
| N | 53.498158 | 10.556705 | 63.082485 | N | 53.680028 | 10.598086 | 63.099658 | N | 53.586049 | 10.590018 | 63.349022 |
| C | 52.128647 | 10.504245 | 63.011620 | C | 52.316721 | 10.488822 | 62.954982 | C | 52.222579 | 10.463684 | 63.303581 |
| C | 51.701784 | 10.362137 | 61.648582 | C | 51.978959 | 10.287675 | 61.575824 | C | 51.811526 | 10.208786 | 61.948343 |
| C | 52.842444 | 10.312162 | 60.876618 | C | 53.164257 | 10.278609 | 60.869722 | C | 52.957937 | 10.187542 | 61.174040 |
| C | 53.953561 | 10.446438 | 61.769997 | C | 54.214418 | 10.477572 | 61.815828 | C | 54.064090 | 10.429434 | 62.049810 |
| N | 56.296834 | 10.744632 | 63.599914 | N | 56.411705 | 10.795765 | 63.801213 | N | 56.414233 | 10.811890 | 63.894118 |
| C | 56.360049 | 10.675477 | 62.211064 | C | 56.579202 | 10.736552 | 62.417882 | C | 56.494694 | 10.745329 | 62.508734 |
| C | 57.721417 | 10.782771 | 61.776848 | C | 57.970932 | 10.789899 | 62.095136 | C | 57.872988 | 10.825197 | 62.118343 |
| C | 58.491217 | 10.913405 | 62.912286 | C | 58.656528 | 10.860100 | 63.290688 | C | 58.619189 | 10.915847 | 63.280245 |
| C | 57.590063 | 10.882119 | 64.029939 | C | 57.677128 | 10.858599 | 64.335537 | C | 57.691651 | 10.895847 | 64.375328 |
| S | 54.628148 | 8.534883  | 65.008137 | S | 54.578390 | 8.255238  | 65.136794 | S | 54.658721 | 8.326023  | 65.167876 |
| O | 55.289440 | 7.765092  | 63.856593 | O | 55.225557 | 7.449587  | 63.981807 | O | 55.335323 | 7.526664  | 64.064405 |
| O | 53.202345 | 7.973600  | 65.088187 | O | 53.114925 | 7.744790  | 65.193297 | O | 53.237760 | 7.822775  | 65.307140 |
| O | 55.338116 | 8.076728  | 66.295941 | O | 55.243235 | 7.717065  | 66.437260 | O | 55.314728 | 7.635710  | 66.578527 |
| C | 52.934910 | 13.851310 | 62.600390 | C | 52.934910 | 13.851310 | 62.600390 | C | 52.934910 | 13.851310 | 62.600390 |
| C | 53.008645 | 13.647042 | 64.110876 | C | 53.015977 | 13.834829 | 64.121595 | C | 53.005253 | 13.938858 | 64.118167 |
| S | 54.631172 | 13.013528 | 64.653270 | S | 54.681091 | 13.376014 | 64.728818 | S | 54.691692 | 13.583950 | 64.752152 |
| H | 55.308035 | 6.102273  | 64.525195 | H | 55.262095 | 5.830300  | 64.627424 | H | 55.270070 | 5.859787  | 64.706416 |
| H | 49.772413 | 4.577886  | 72.461021 | H | 50.687981 | 3.883878  | 72.471589 | H | 50.773627 | 3.826322  | 72.398212 |
| H | 51.142632 | 3.671323  | 71.794475 | H | 50.253360 | 3.785990  | 70.754590 | H | 50.248709 | 3.854171  | 70.703442 |
| H | 49.808744 | 4.178241  | 70.733688 | H | 49.484843 | 5.001269  | 71.798148 | H | 49.467686 | 4.915297  | 71.893712 |
| H | 50.424904 | 6.597886  | 71.120950 | H | 51.712359 | 6.145376  | 72.114306 | H | 51.641441 | 6.174762  | 72.196875 |
| H | 51.735411 | 6.094789  | 72.196951 | H | 52.492268 | 4.947524  | 71.077192 | H | 52.422810 | 5.121414  | 71.021514 |
| H | 52.838931 | 4.895035  | 70.281165 | H | 51.107152 | 5.704119  | 69.134501 | H | 50.790693 | 5.934300  | 69.250466 |
| H | 51.530925 | 5.449245  | 69.208759 | H | 50.217443 | 6.804280  | 70.173795 | H | 50.021333 | 6.961723  | 70.454378 |
| H | 54.459904 | 6.681373  | 67.196436 | H | 54.124422 | 6.495727  | 67.403375 | H | 53.987633 | 6.375853  | 67.728602 |
| H | 53.200634 | 5.635415  | 67.753690 | H | 52.762305 | 5.604184  | 67.995776 | H | 52.968750 | 5.495747  | 68.822674 |
| H | 54.791473 | 8.608901  | 68.024455 | H | 54.595213 | 8.446836  | 67.991871 | H | 54.326338 | 8.520813  | 67.947318 |
| H | 54.098694 | 9.118345  | 69.536428 | H | 53.697539 | 9.328693  | 69.189472 | H | 53.284085 | 9.552900  | 68.906711 |
| H | 52.082394 | 2.153993  | 62.255543 | H | 52.035258 | 2.238807  | 62.255036 | H | 52.035534 | 2.262357  | 62.252677 |
| H | 51.825040 | 3.286226  | 63.603584 | H | 51.935254 | 3.313346  | 63.671262 | H | 51.899384 | 3.284433  | 63.704473 |
| H | 54.237980 | 3.325920  | 63.029783 | H | 54.317924 | 3.144033  | 63.037169 | H | 54.286281 | 3.228496  | 63.049695 |
| H | 54.340908 | 1.568311  | 63.089691 | H | 54.244772 | 1.385236  | 62.980430 | H | 54.280914 | 1.470868  | 62.942335 |
| H | 54.040518 | 1.513195  | 65.489706 | H | 54.114625 | 1.177962  | 65.360100 | H | 54.149062 | 1.191853  | 65.320825 |
| H | 53.441210 | 3.162453  | 65.544076 | H | 53.491305 | 2.805240  | 65.572815 | H | 53.508168 | 2.805613  | 65.577258 |
| H | 54.032720 | 4.976238  | 64.921139 | H | 54.019777 | 4.664761  | 65.016416 | H | 54.004684 | 4.724187  | 65.113204 |
| H | 57.873445 | 3.819784  | 65.581211 | H | 57.906758 | 3.572236  | 65.524176 | H | 57.927049 | 3.643307  | 65.509263 |
| H | 57.463084 | 5.515743  | 65.598796 | H | 57.451089 | 5.255653  | 65.628781 | H | 57.419153 | 5.278406  | 65.666746 |
| H | 57.848270 | 2.800520  | 61.163656 | H | 57.830659 | 2.798204  | 61.163332 | H | 57.804001 | 2.797269  | 61.160577 |
| H | 56.784624 | 3.698097  | 62.264821 | H | 56.791617 | 3.709355  | 62.276883 | H | 56.802049 | 3.724164  | 62.294077 |
| H | 58.549290 | 3.847555  | 62.405586 | H | 58.559646 | 3.837592  | 62.394185 | H | 58.575337 | 3.821939  | 62.376830 |
| H | 58.658217 | 5.024804  | 60.189891 | H | 58.660738 | 5.035410  | 60.197415 | H | 58.647983 | 5.009058  | 60.168681 |
| H | 56.945448 | 4.723491  | 59.901527 | H | 56.949698 | 4.725677  | 59.897351 | H | 56.922893 | 4.741290  | 59.919163 |
| H | 56.286809 | 6.215435  | 61.743137 | H | 56.262975 | 6.190037  | 61.739227 | H | 56.329335 | 6.227866  | 61.776747 |
| H | 57.333897 | 7.080102  | 60.611507 | H | 57.330291 | 7.086453  | 60.650535 | H | 57.380146 | 7.091288  | 60.645040 |
| H | 59.291699 | 6.699311  | 62.173234 | H | 59.248135 | 6.714318  | 62.248187 | H | 59.343980 | 6.689066  | 62.176520 |
| H | 58.213213 | 5.822536  | 63.273410 | H | 58.182010 | 5.748347  | 63.284208 | H | 58.295357 | 5.752322  | 63.256960 |
| H | 58.169580 | 8.726495  | 62.685577 | H | 58.033379 | 8.668509  | 62.836686 | H | 58.162157 | 8.674903  | 62.767306 |
| H | 58.256758 | 7.901768  | 64.155807 | H | 58.160214 | 7.780939  | 64.266381 | H | 58.367165 | 7.830640  | 64.205974 |
| H | 52.365507 | 2.995252  | 58.672432 | H | 52.412506 | 3.033358  | 58.632624 | H | 52.460875 | 3.078808  | 58.591891 |
| H | 52.044977 | 4.674706  | 58.192412 | H | 51.982951 | 4.705012  | 58.214357 | H | 51.917115 | 4.732665  | 58.240475 |
| H | 50.861432 | 3.791801  | 59.178631 | H | 50.876615 | 3.723154  | 59.196113 | H | 50.897499 | 3.649968  | 59.210462 |
| H | 53.708069 | 4.554605  | 60.096843 | H | 53.695154 | 4.620638  | 60.075824 | H | 53.673578 | 4.699269  | 60.050514 |

|   |           |           |           |   |           |           |           |   |           |           |           |
|---|-----------|-----------|-----------|---|-----------|-----------|-----------|---|-----------|-----------|-----------|
| H | 52.533243 | 3.679888  | 61.069713 | H | 52.597680 | 3.651864  | 61.046657 | H | 52.676313 | 3.625028  | 61.017099 |
| H | 50.993078 | 5.660988  | 61.005402 | H | 50.948709 | 5.552002  | 61.080366 | H | 50.927482 | 5.398220  | 61.228230 |
| H | 52.181868 | 6.549684  | 60.041903 | H | 52.069997 | 6.529679  | 60.121571 | H | 51.885922 | 6.478657  | 60.204137 |
| H | 53.843793 | 6.389172  | 61.927166 | H | 53.788401 | 6.364772  | 61.971261 | H | 53.739782 | 6.468540  | 61.899682 |
| H | 52.676730 | 5.443128  | 62.871159 | H | 52.669728 | 5.361537  | 62.906728 | H | 52.824799 | 5.316446  | 62.895244 |
| H | 52.323551 | 8.268805  | 61.991912 | H | 52.261707 | 8.207221  | 62.135573 | H | 52.036186 | 8.124801  | 62.277636 |
| H | 52.637976 | 7.729858  | 63.581120 | H | 52.555141 | 7.591532  | 63.707029 | H | 52.533513 | 7.508649  | 63.762300 |
| H | 59.075944 | 10.993168 | 65.547050 | H | 59.056434 | 10.843934 | 65.953864 | H | 59.090426 | 10.733937 | 65.976652 |
| H | 53.769219 | 11.582300 | 69.033409 | H | 53.552957 | 11.810304 | 69.035975 | H | 53.847792 | 12.325566 | 69.193378 |
| H | 50.193099 | 10.401062 | 63.902888 | H | 50.329252 | 10.392341 | 63.718104 | H | 50.291253 | 10.449133 | 64.202954 |
| H | 55.477767 | 10.432958 | 60.300479 | H | 55.833177 | 10.494270 | 60.447829 | H | 55.613247 | 10.429808 | 60.605882 |
| H | 59.060838 | 9.506746  | 67.805257 | H | 58.654415 | 9.217001  | 68.224135 | H | 57.625778 | 8.604554  | 68.582798 |
| H | 57.398845 | 9.103721  | 68.341601 | H | 56.910113 | 9.004477  | 68.544437 | H | 56.001960 | 9.305899  | 68.814733 |
| H | 58.519825 | 9.930238  | 69.445848 | H | 57.974993 | 9.668078  | 69.806509 | H | 57.255536 | 9.544193  | 70.036702 |
| H | 58.289672 | 13.263655 | 67.626225 | H | 58.419573 | 13.022763 | 68.046582 | H | 59.340302 | 11.979267 | 68.136671 |
| H | 58.767328 | 12.557838 | 69.162755 | H | 58.598573 | 12.257513 | 69.618156 | H | 59.118786 | 11.194954 | 69.689153 |
| H | 51.580064 | 9.273436  | 68.873890 | H | 51.236465 | 9.665126  | 68.871780 | H | 51.343004 | 10.314820 | 69.424299 |
| H | 50.248887 | 10.352858 | 69.350188 | H | 49.952182 | 10.860310 | 69.142907 | H | 50.167614 | 11.628774 | 69.575335 |
| H | 51.895620 | 10.740142 | 69.851605 | H | 51.578048 | 11.197122 | 69.738363 | H | 51.845915 | 11.915660 | 70.044583 |
| H | 51.222685 | 13.133015 | 66.969833 | H | 51.255720 | 13.336578 | 66.599394 | H | 51.491951 | 13.649315 | 66.673820 |
| H | 51.818152 | 13.057440 | 68.649420 | H | 51.671450 | 13.396112 | 68.332959 | H | 51.913659 | 13.912318 | 68.387059 |
| H | 50.467612 | 9.446133  | 66.755883 | H | 50.389565 | 9.648070  | 66.655066 | H | 50.449473 | 10.032298 | 67.229505 |
| H | 50.665339 | 10.315010 | 61.327622 | H | 50.965528 | 10.201515 | 61.194706 | H | 50.781183 | 10.112284 | 61.617068 |
| H | 52.925081 | 10.222761 | 59.797596 | H | 53.309517 | 10.165959 | 59.799605 | H | 53.032914 | 10.045901 | 60.099963 |
| H | 58.042012 | 10.771512 | 60.739339 | H | 58.372569 | 10.777605 | 61.086282 | H | 58.234569 | 10.821088 | 61.094178 |
| H | 59.567825 | 11.032422 | 62.990625 | H | 59.728982 | 10.914078 | 63.450794 | H | 59.698423 | 10.983786 | 63.377681 |
| H | 56.916613 | 7.671709  | 66.120714 | H | 56.825105 | 7.364831  | 66.245084 | H | 56.334228 | 7.737800  | 66.529674 |
| H | 53.093623 | 12.908865 | 62.066043 | H | 53.209875 | 12.879834 | 62.178376 | H | 53.210564 | 12.852556 | 62.247463 |
| H | 52.232579 | 12.955337 | 64.456996 | H | 52.291568 | 13.124869 | 64.538549 | H | 52.303304 | 13.236761 | 64.583987 |
| H | 52.869050 | 14.599531 | 64.639861 | H | 52.785329 | 14.824493 | 64.536029 | H | 52.753167 | 14.946228 | 64.471555 |
| H | 52.689090 | 7.672117  | 70.646454 | H | 52.089271 | 8.214218  | 70.381405 | H | 51.782900 | 8.464668  | 70.372125 |
| H | 56.180015 | 2.278970  | 65.702610 | H | 56.240129 | 1.977976  | 65.622439 | H | 56.275655 | 2.006554  | 65.557365 |
| H | 56.820173 | 7.935679  | 63.354216 | H | 56.713371 | 7.772263  | 63.475927 | H | 56.889469 | 7.806453  | 63.470384 |
| H | 51.191068 | 7.371142  | 62.784144 | H | 51.118048 | 7.262690  | 62.862633 | H | 51.082530 | 7.019140  | 63.080538 |
| H | 51.947003 | 14.245083 | 62.321693 | H | 51.911111 | 14.091132 | 62.278184 | H | 51.911475 | 14.067362 | 62.262001 |
| H | 53.695519 | 14.567651 | 62.264106 | H | 53.612251 | 14.607119 | 62.181754 | H | 53.611938 | 14.577854 | 62.133487 |
| O | 52.310999 | 5.512128  | 65.628762 | O | 52.271152 | 5.246503  | 65.637589 | O | 52.239328 | 5.308972  | 65.414665 |
| H | 52.571665 | 6.471963  | 65.512547 | H | 52.535742 | 6.210065  | 65.531999 | H | 52.547819 | 6.235952  | 65.591161 |
| H | 51.350542 | 5.470302  | 65.487109 | H | 51.322079 | 5.201794  | 65.435478 | H | 51.694367 | 5.063553  | 66.181367 |
| O | 57.828017 | 7.275864  | 65.941512 | O | 57.757480 | 7.029896  | 66.035712 | O | 57.902780 | 7.968774  | 66.113861 |
| H | 58.391517 | 7.563437  | 66.679750 | H | 58.309905 | 7.287133  | 66.792993 | H | 57.700038 | 8.889806  | 65.817536 |
| H | 60.334870 | 14.051288 | 68.102508 | H | 60.503494 | 13.427685 | 68.984034 | H | 58.620531 | 8.250904  | 66.824377 |
| H | 51.880034 | 1.539998  | 63.898122 | H | 51.811800 | 1.557973  | 63.866645 | H | 51.847780 | 1.518340  | 63.839991 |
| H | 56.256453 | 11.025118 | 69.557471 | H | 55.936957 | 11.124828 | 69.770138 | H | 56.286850 | 11.759542 | 69.882036 |
| H | 56.370870 | 12.654475 | 68.887128 | H | 56.268936 | 12.693936 | 69.024912 | H | 56.945982 | 12.885144 | 68.661384 |
| H | 49.736093 | 11.030505 | 66.391692 | H | 49.697582 | 11.202285 | 66.114282 | H | 49.786379 | 11.536363 | 66.532814 |

**Siroheme (Fe<sup>2+</sup>) with SO<sub>3</sub><sup>2-</sup>**

| <b>S=0</b> |           |          | <b>S=1</b> |   |           | <b>S=2</b> |           |   |           |          |           |
|------------|-----------|----------|------------|---|-----------|------------|-----------|---|-----------|----------|-----------|
| C          | 51.422358 | 3.380522 | 70.997438  | C | 51.422358 | 3.380522   | 70.997438 | C | 51.422358 | 3.380522 | 70.997438 |
| C          | 51.652695 | 4.214206 | 69.734214  | C | 51.675545 | 4.200447   | 69.729184 | C | 51.737950 | 4.239196 | 69.773310 |
| C          | 52.747055 | 5.264881 | 69.920259  | C | 52.734065 | 5.285060   | 69.931909 | C | 52.770746 | 5.324263 | 70.073202 |
| N          | 52.971919 | 5.991034 | 68.672322  | N | 52.976876 | 5.993345   | 68.676440 | N | 53.072590 | 6.070434 | 68.855613 |
| C          | 54.007741 | 6.821671 | 68.438630  | C | 53.987519 | 6.856710   | 68.455157 | C | 54.176177 | 6.811912 | 68.644595 |
| N          | 54.891866 | 7.080540 | 69.413674  | N | 54.834256 | 7.169507   | 69.445175 | N | 55.059980 | 7.010621 | 69.634250 |
| N          | 54.156949 | 7.378819 | 67.238930  | N | 54.147326 | 7.400489   | 67.250069 | N | 54.390063 | 7.350995 | 67.446460 |
| C          | 55.076348 | 1.425184 | 63.280932  | C | 55.076348 | 1.425184   | 63.280932 | C | 55.076348 | 1.425184 | 63.280932 |
| C          | 56.450302 | 1.990685 | 63.631337  | C | 56.463274 | 1.963779   | 63.622201 | C | 56.536442 | 1.743374 | 63.594057 |
| C          | 56.675846 | 2.069232 | 65.151447  | C | 56.702600 | 2.016326   | 65.141154 | C | 56.829069 | 1.672407 | 65.106542 |

|    |           |           |           |    |           |           |           |    |           |           |           |
|----|-----------|-----------|-----------|----|-----------|-----------|-----------|----|-----------|-----------|-----------|
| N  | 57.701753 | 3.035503  | 65.536548 | N  | 57.743433 | 2.962561  | 65.533880 | N  | 57.905132 | 2.558955  | 65.539015 |
| C  | 57.527384 | 4.367344  | 65.384644 | C  | 57.584175 | 4.298142  | 65.415363 | C  | 57.780046 | 3.903786  | 65.501905 |
| N  | 56.310360 | 4.850351  | 65.136348 | N  | 56.373035 | 4.800996  | 65.172071 | N  | 56.578289 | 4.448245  | 65.308987 |
| N  | 58.557883 | 5.207147  | 65.502924 | N  | 58.621861 | 5.124156  | 65.567995 | N  | 58.841717 | 4.692801  | 65.687488 |
| C  | 60.333112 | 3.765595  | 62.506421 | C  | 60.333112 | 3.765595  | 62.506421 | C  | 60.333112 | 3.765595  | 62.506421 |
| C  | 60.256756 | 4.891209  | 61.442682 | C  | 60.256756 | 4.891209  | 61.442682 | C  | 60.256756 | 4.891209  | 61.442682 |
| C  | 59.943389 | 6.266893  | 62.037255 | C  | 59.981039 | 6.269466  | 62.054243 | C  | 59.997912 | 6.275061  | 62.043770 |
| C  | 61.012349 | 6.775353  | 63.003133 | C  | 61.069816 | 6.736712  | 63.019977 | C  | 61.138710 | 6.789146  | 62.922454 |
| N  | 60.659405 | 8.133666  | 63.483233 | N  | 60.735102 | 8.078794  | 63.554606 | N  | 60.754386 | 8.093374  | 63.518726 |
| C  | 55.161658 | 2.803979  | 58.893853 | C  | 55.161658 | 2.803979  | 58.893853 | C  | 55.161658 | 2.803979  | 58.893853 |
| C  | 55.522484 | 3.451533  | 60.237172 | C  | 55.522484 | 3.451533  | 60.237172 | C  | 55.522484 | 3.451533  | 60.237172 |
| C  | 55.797815 | 4.950909  | 60.176744 | C  | 55.725887 | 4.963174  | 60.173370 | C  | 55.732628 | 4.965166  | 60.244796 |
| C  | 56.079177 | 5.461527  | 61.579917 | C  | 56.039435 | 5.492031  | 61.562532 | C  | 56.079722 | 5.389186  | 61.666404 |
| N  | 56.158892 | 6.935969  | 61.678710 | N  | 56.051521 | 6.968480  | 61.649268 | N  | 56.104315 | 6.855570  | 61.883530 |
| Fe | 56.621153 | 10.468377 | 64.048043 | Fe | 56.724968 | 10.554139 | 63.908765 | Fe | 56.632123 | 10.793307 | 63.946394 |
| C  | 60.004459 | 10.871343 | 63.958120 | C  | 60.144811 | 10.824506 | 63.994460 | C  | 60.066648 | 10.901871 | 63.793589 |
| C  | 56.603704 | 11.659616 | 67.192767 | C  | 56.610154 | 11.750435 | 67.063090 | C  | 56.779710 | 11.502290 | 67.261389 |
| C  | 53.255208 | 9.973709  | 64.155207 | C  | 53.350454 | 9.970144  | 63.974004 | C  | 53.320415 | 9.881507  | 64.284213 |
| C  | 56.623800 | 9.787665  | 60.654181 | C  | 56.853737 | 9.725932  | 60.558493 | C  | 56.559919 | 9.682254  | 60.618982 |
| N  | 58.027208 | 10.933018 | 65.365650 | N  | 58.103280 | 10.968399 | 65.306864 | N  | 58.177640 | 11.033997 | 65.313673 |
| C  | 59.400944 | 10.814126 | 65.172162 | C  | 59.490980 | 10.802770 | 65.175929 | C  | 59.528911 | 10.922814 | 65.051510 |
| C  | 60.111383 | 10.726916 | 66.511769 | C  | 60.125039 | 10.734570 | 66.552546 | C  | 60.304788 | 10.864883 | 66.365842 |
| C  | 59.997798 | 9.291077  | 67.075888 | C  | 59.945764 | 9.323982  | 67.158453 | C  | 60.271522 | 9.432741  | 66.950454 |
| C  | 61.569165 | 11.190575 | 66.510229 | C  | 61.595387 | 11.154605 | 66.615110 | C  | 61.741454 | 11.386272 | 66.295177 |
| C  | 62.677092 | 10.327874 | 65.842372 | C  | 62.706249 | 10.203310 | 66.088167 | C  | 62.849592 | 10.552707 | 65.587951 |
| O  | 62.393802 | 9.253606  | 65.201915 | O  | 62.421475 | 9.178539  | 65.373857 | O  | 62.577979 | 9.453720  | 64.987494 |
| O  | 63.845338 | 10.766594 | 65.994091 | O  | 63.876955 | 10.530359 | 66.413285 | O  | 64.003907 | 11.045401 | 65.666514 |
| C  | 59.157809 | 11.634060 | 67.324360 | C  | 59.159282 | 11.697386 | 67.285580 | C  | 59.346327 | 11.721732 | 67.236958 |
| C  | 57.839248 | 11.399600 | 66.620203 | C  | 57.864677 | 11.469330 | 66.531754 | C  | 58.005056 | 11.407606 | 66.603098 |
| N  | 55.198498 | 10.738344 | 65.424916 | N  | 55.253019 | 10.777986 | 65.281152 | N  | 55.270306 | 10.582755 | 65.576229 |
| C  | 55.381020 | 11.329440 | 66.636671 | C  | 55.405052 | 11.389686 | 66.479904 | C  | 55.519682 | 11.123625 | 66.785905 |
| C  | 54.061291 | 11.650623 | 67.328795 | C  | 54.061040 | 11.685343 | 67.142629 | C  | 54.227487 | 11.388601 | 67.560102 |
| C  | 54.056327 | 11.380792 | 68.834308 | C  | 54.035126 | 11.457849 | 68.654253 | C  | 54.280593 | 10.982589 | 69.034080 |
| C  | 53.752680 | 13.145572 | 67.023796 | C  | 53.710017 | 13.160895 | 66.792343 | C  | 53.940623 | 12.912021 | 67.404814 |
| C  | 52.407295 | 13.612094 | 67.620088 | C  | 52.339143 | 13.597206 | 67.354172 | C  | 52.612416 | 13.334596 | 68.072869 |
| O  | 52.455490 | 14.296533 | 68.685617 | O  | 52.346990 | 14.304908 | 68.405092 | O  | 52.691645 | 13.867998 | 69.219635 |
| O  | 51.352715 | 13.256414 | 67.007907 | O  | 51.308830 | 13.195782 | 66.729852 | O  | 51.543800 | 13.093956 | 67.430926 |
| C  | 53.106105 | 10.722205 | 66.562084 | C  | 53.149176 | 10.703888 | 66.386176 | C  | 53.212999 | 10.554329 | 66.746717 |
| C  | 53.855827 | 10.445076 | 65.289582 | C  | 53.911323 | 10.444837 | 65.118042 | C  | 53.929638 | 10.313092 | 65.442162 |
| N  | 55.234933 | 9.932519  | 62.689375 | N  | 55.381047 | 9.924296  | 62.542599 | N  | 55.218292 | 9.895958  | 62.683007 |
| C  | 53.896830 | 9.746298  | 62.921666 | C  | 54.020666 | 9.740765  | 62.746526 | C  | 53.906999 | 9.663455  | 63.006925 |
| C  | 53.224399 | 9.337620  | 61.723302 | C  | 53.389551 | 9.349293  | 61.544611 | C  | 53.197925 | 9.186921  | 61.852784 |
| C  | 54.172988 | 9.302760  | 60.722679 | C  | 54.379677 | 9.313088  | 60.557192 | C  | 54.100958 | 9.142503  | 60.805565 |
| C  | 55.416940 | 9.690446  | 61.328267 | C  | 55.604580 | 9.692403  | 61.188113 | C  | 55.361755 | 9.600404  | 61.329601 |
| N  | 58.025899 | 10.351463 | 62.599006 | N  | 58.206810 | 10.313660 | 62.544719 | N  | 58.053306 | 10.356304 | 62.462449 |
| C  | 57.837727 | 10.107955 | 61.241470 | C  | 58.061036 | 10.050619 | 61.188084 | C  | 57.813118 | 10.039316 | 61.136206 |
| C  | 59.070324 | 10.280786 | 60.526225 | C  | 59.319924 | 10.186232 | 60.529568 | C  | 59.036272 | 10.142934 | 60.394197 |
| C  | 60.011131 | 10.667413 | 61.455488 | C  | 60.242951 | 10.576030 | 61.500476 | C  | 60.015786 | 10.543279 | 61.287366 |
| C  | 59.341601 | 10.707800 | 62.727321 | C  | 59.536591 | 10.658519 | 62.728084 | C  | 59.381266 | 10.672894 | 62.570711 |
| S  | 56.859650 | 8.377520  | 64.809984 | S  | 56.933166 | 8.326857  | 64.859445 | S  | 57.243820 | 7.969910  | 65.148064 |
| O  | 58.202012 | 7.699300  | 64.491433 | O  | 58.285752 | 7.654379  | 64.624914 | O  | 58.584958 | 7.261033  | 64.853027 |
| O  | 55.821873 | 7.336930  | 64.200665 | O  | 55.912917 | 7.304439  | 64.232678 | O  | 56.184119 | 6.981068  | 64.471697 |
| O  | 56.648668 | 8.200411  | 66.305617 | O  | 56.648772 | 8.249282  | 66.345747 | O  | 56.990917 | 7.748011  | 66.642808 |
| C  | 54.634215 | 12.941636 | 61.407585 | C  | 54.634215 | 12.941636 | 61.407585 | C  | 54.634215 | 12.941636 | 61.407585 |
| C  | 54.791156 | 13.084650 | 62.920885 | C  | 54.893679 | 13.078489 | 62.906907 | C  | 54.590646 | 13.188162 | 62.910891 |
| S  | 56.478971 | 12.725799 | 63.536406 | S  | 56.609651 | 12.658051 | 63.375440 | S  | 56.242260 | 13.074650 | 63.709306 |
| H  | 56.154785 | 5.856575  | 64.872566 | H  | 56.235570 | 5.805059  | 64.900814 | H  | 56.461238 | 5.468302  | 65.074777 |
| H  | 50.632069 | 2.637871  | 70.833154 | H  | 50.651762 | 2.620997  | 70.818863 | H  | 50.674549 | 2.615908  | 70.753999 |



|   |           |           |           |   |           |           |           |   |           |           |           |
|---|-----------|-----------|-----------|---|-----------|-----------|-----------|---|-----------|-----------|-----------|
| H | 51.119092 | 4.013706  | 71.842339 | H | 51.080386 | 4.019690  | 71.822699 | H | 51.023520 | 3.990640  | 71.819233 |
| H | 52.335388 | 2.843472  | 71.288452 | H | 52.335714 | 2.864867  | 71.325057 | H | 52.322183 | 2.868028  | 71.364072 |
| H | 51.935876 | 3.555568  | 68.898771 | H | 52.004372 | 3.535900  | 68.915591 | H | 52.121901 | 3.605531  | 68.959823 |
| H | 50.718932 | 4.719056  | 69.443084 | H | 50.739470 | 4.675631  | 69.397562 | H | 50.818065 | 4.715779  | 69.402048 |
| H | 52.461868 | 5.964331  | 70.723856 | H | 52.403273 | 5.991540  | 70.710926 | H | 52.394329 | 5.999850  | 70.858369 |
| H | 53.684124 | 4.769673  | 70.222648 | H | 53.674314 | 4.822529  | 70.273479 | H | 53.695816 | 4.857185  | 70.445393 |
| H | 55.601537 | 7.831620  | 69.262949 | H | 55.525761 | 7.934662  | 69.296324 | H | 55.819042 | 7.708768  | 69.490965 |
| H | 54.671457 | 6.814744  | 70.364903 | H | 54.624613 | 6.884761  | 70.392913 | H | 54.798354 | 6.784307  | 70.585096 |
| H | 55.058900 | 7.818407  | 66.973832 | H | 55.045331 | 7.850861  | 66.997444 | H | 55.350073 | 7.662895  | 67.197364 |
| H | 53.589367 | 7.082591  | 66.429947 | H | 53.599566 | 7.090490  | 66.433053 | H | 53.833313 | 7.060821  | 66.627628 |
| H | 54.958079 | 1.314840  | 62.197171 | H | 54.945538 | 1.325047  | 62.197733 | H | 54.899845 | 1.386760  | 62.200474 |
| H | 54.275211 | 2.084513  | 63.643193 | H | 54.289848 | 2.094916  | 63.656286 | H | 54.406446 | 2.186071  | 63.706354 |
| H | 56.546710 | 2.999766  | 63.207995 | H | 56.573562 | 2.976309  | 63.209712 | H | 56.774882 | 2.753563  | 63.234014 |
| H | 57.249518 | 1.387253  | 63.179440 | H | 57.247585 | 1.352659  | 63.154700 | H | 57.209789 | 1.058632  | 63.061073 |
| H | 56.979891 | 1.097205  | 65.554119 | H | 56.997082 | 1.034129  | 65.525619 | H | 57.107606 | 0.656707  | 65.405509 |
| H | 55.737201 | 2.324115  | 65.667722 | H | 55.771401 | 2.275158  | 65.668980 | H | 55.922019 | 1.913029  | 65.683202 |
| H | 55.524262 | 4.217583  | 65.085467 | H | 55.584842 | 4.175738  | 65.077126 | H | 55.773583 | 3.846005  | 65.202347 |
| H | 59.490887 | 4.833252  | 65.618883 | H | 59.551958 | 4.739020  | 65.670205 | H | 59.763095 | 4.273579  | 65.703098 |
| H | 58.435842 | 6.216950  | 65.226509 | H | 58.512608 | 6.138685  | 65.317497 | H | 58.762158 | 5.720206  | 65.463366 |
| H | 60.504171 | 2.790900  | 62.032703 | H | 60.472244 | 2.786091  | 62.031820 | H | 60.478661 | 2.787674  | 62.030774 |
| H | 59.392551 | 3.705297  | 63.072475 | H | 59.404026 | 3.726969  | 63.092679 | H | 59.402810 | 3.724447  | 63.089247 |
| H | 61.148569 | 3.936314  | 63.220658 | H | 61.167668 | 3.918995  | 63.201850 | H | 61.163730 | 3.922984  | 63.205997 |
| H | 61.206266 | 4.936199  | 60.888477 | H | 61.195851 | 4.919947  | 60.870075 | H | 61.188690 | 4.908034  | 60.857540 |
| H | 59.480561 | 4.638740  | 60.705870 | H | 59.460220 | 4.656439  | 60.722172 | H | 59.451242 | 4.657988  | 60.731321 |
| H | 58.985283 | 6.236940  | 62.579851 | H | 59.026002 | 6.252849  | 62.603229 | H | 59.086013 | 6.249808  | 62.660918 |
| H | 59.827488 | 7.003762  | 61.226583 | H | 59.872405 | 7.021889  | 61.257240 | H | 59.822552 | 7.006168  | 61.238554 |
| H | 61.995933 | 6.822594  | 62.520415 | H | 62.045365 | 6.795252  | 62.522274 | H | 62.060933 | 6.923442  | 62.344979 |
| H | 61.103027 | 6.129857  | 63.883742 | H | 61.170999 | 6.059174  | 63.874918 | H | 61.352735 | 6.104349  | 63.750390 |
| H | 60.597969 | 8.794675  | 62.693528 | H | 60.671573 | 8.776930  | 62.790672 | H | 60.501854 | 8.768402  | 62.780087 |
| H | 61.337277 | 8.562132  | 64.194664 | H | 61.409076 | 8.476458  | 64.280515 | H | 61.489868 | 8.577186  | 64.122183 |
| H | 54.969507 | 1.730504  | 59.016584 | H | 55.016534 | 1.721832  | 59.005958 | H | 55.022403 | 1.722288  | 59.014585 |
| H | 55.975898 | 2.920589  | 58.165217 | H | 55.955586 | 2.963283  | 58.151049 | H | 55.952613 | 2.962464  | 58.147593 |
| H | 54.259931 | 3.262969  | 58.465486 | H | 54.233171 | 3.229951  | 58.489329 | H | 54.229915 | 3.222829  | 58.489210 |
| H | 56.403636 | 2.941816  | 60.658481 | H | 56.435725 | 2.980419  | 60.634370 | H | 56.433300 | 2.969569  | 60.628562 |
| H | 54.700848 | 3.280287  | 60.949218 | H | 54.725163 | 3.240094  | 60.965503 | H | 54.726644 | 3.222100  | 60.961860 |
| H | 54.921077 | 5.477515  | 59.768923 | H | 54.810860 | 5.447783  | 59.799217 | H | 54.814541 | 5.478957  | 59.921136 |
| H | 56.645980 | 5.168548  | 59.510298 | H | 56.536362 | 5.219506  | 59.474565 | H | 56.533839 | 5.259199  | 59.550328 |
| H | 57.018471 | 5.053894  | 61.976262 | H | 57.013994 | 5.131942  | 61.918792 | H | 57.060811 | 4.999977  | 61.968923 |
| H | 55.275271 | 5.153157  | 62.259997 | H | 55.280906 | 5.148064  | 62.277003 | H | 55.337985 | 4.991089  | 62.369989 |
| H | 57.015958 | 7.338000  | 61.282248 | H | 56.846491 | 7.428832  | 61.177917 | H | 56.865911 | 7.336232  | 61.387312 |
| H | 56.078628 | 7.221172  | 62.740517 | H | 56.053523 | 7.253013  | 62.691951 | H | 56.196041 | 7.045043  | 62.961275 |
| H | 61.089067 | 10.932444 | 63.926036 | H | 61.231885 | 10.838136 | 64.014077 | H | 61.150733 | 10.942625 | 63.719999 |
| H | 56.599883 | 12.152791 | 68.164729 | H | 56.577560 | 12.263171 | 68.023487 | H | 56.806895 | 11.943394 | 68.258698 |
| H | 52.170593 | 9.853949  | 64.178502 | H | 52.267181 | 9.832838  | 63.971540 | H | 52.237632 | 9.748641  | 64.332193 |
| H | 56.614342 | 9.611537  | 59.577858 | H | 56.877705 | 9.550494  | 59.482844 | H | 56.516080 | 9.451632  | 59.553617 |
| H | 60.597020 | 8.596642  | 66.481845 | H | 60.552726 | 8.595328  | 66.614976 | H | 60.839335 | 8.738909  | 66.327916 |
| H | 58.956820 | 8.953941  | 67.077277 | H | 58.898380 | 9.011468  | 67.119589 | H | 59.242003 | 9.071356  | 67.043391 |
| H | 60.372101 | 9.280099  | 68.109688 | H | 60.268832 | 9.338291  | 68.209439 | H | 60.723438 | 9.447261  | 67.952419 |
| H | 61.640963 | 12.190977 | 66.057014 | H | 61.730477 | 12.111850 | 66.087097 | H | 61.754065 | 12.380202 | 65.822426 |
| H | 61.894632 | 11.316579 | 67.554024 | H | 61.857143 | 11.355658 | 67.664334 | H | 62.109078 | 11.541590 | 67.320858 |
| H | 59.119017 | 11.385390 | 68.392390 | H | 59.065942 | 11.496072 | 68.359981 | H | 59.389632 | 11.476344 | 68.304860 |
| H | 54.323258 | 10.335049 | 69.039946 | H | 54.313166 | 10.422716 | 68.894757 | H | 54.518387 | 9.915618  | 69.132492 |
| H | 53.056321 | 11.567507 | 69.246286 | H | 53.025075 | 11.639878 | 69.042711 | H | 53.310603 | 11.167682 | 69.512020 |
| H | 54.753515 | 12.037617 | 69.370599 | H | 54.711427 | 12.141245 | 69.183812 | H | 55.027514 | 11.565728 | 69.588954 |
| H | 53.740298 | 13.274503 | 65.932434 | H | 53.705984 | 13.261681 | 65.698006 | H | 53.912258 | 13.147502 | 66.331204 |
| H | 54.567129 | 13.756183 | 67.433933 | H | 54.496194 | 13.809810 | 67.198625 | H | 54.770583 | 13.468799 | 67.858339 |
| H | 52.159586 | 9.133889  | 61.649368 | H | 52.326362 | 9.151539  | 61.437784 | H | 52.142941 | 8.926312  | 61.832243 |
| H | 54.037056 | 9.085059  | 59.666491 | H | 54.266813 | 9.101855  | 59.496835 | H | 53.917347 | 8.852325  | 59.774232 |

|   |           |           |           |   |           |           |           |   |           |           |           |
|---|-----------|-----------|-----------|---|-----------|-----------|-----------|---|-----------|-----------|-----------|
| H | 59.189496 | 10.150735 | 59.454068 | H | 59.483357 | 10.036793 | 59.465680 | H | 59.143199 | 9.949433  | 59.330071 |
| H | 61.057555 | 10.916293 | 61.297381 | H | 61.301023 | 10.794540 | 61.377708 | H | 61.066832 | 10.734906 | 61.086494 |
| H | 54.862812 | 11.922984 | 61.085044 | H | 54.779032 | 11.909113 | 61.076915 | H | 55.060274 | 11.958280 | 61.190089 |
| H | 54.087178 | 12.427607 | 63.446740 | H | 54.214053 | 12.439929 | 63.483052 | H | 53.933438 | 12.457584 | 63.400262 |
| H | 54.559016 | 14.114274 | 63.231142 | H | 54.736115 | 14.115234 | 63.237644 | H | 54.188512 | 14.187200 | 63.129013 |
| H | 52.331153 | 5.824706  | 67.903085 | H | 52.370505 | 5.785079  | 67.890599 | H | 52.454989 | 5.939381  | 68.061734 |
| H | 58.649530 | 2.702857  | 65.670749 | H | 58.683755 | 2.614791  | 65.681082 | H | 58.837744 | 2.177277  | 65.642291 |
| H | 59.693572 | 8.127603  | 63.914213 | H | 59.776101 | 8.066751  | 63.991686 | H | 59.880004 | 7.948910  | 64.100599 |
| H | 55.374140 | 7.414136  | 61.201937 | H | 55.212296 | 7.417365  | 61.227054 | H | 55.235858 | 7.318372  | 61.559045 |
| H | 53.604471 | 13.183117 | 61.095621 | H | 53.600942 | 13.241209 | 61.174566 | H | 53.621938 | 12.984924 | 60.974484 |
| H | 55.319249 | 13.623894 | 60.884175 | H | 55.314272 | 13.585530 | 60.833375 | H | 55.253872 | 13.699895 | 60.908015 |
| O | 53.207742 | 6.945388  | 64.613183 | O | 53.274869 | 6.975672  | 64.600483 | O | 53.526540 | 6.860405  | 64.802293 |
| H | 54.173652 | 7.138924  | 64.432382 | H | 54.249308 | 7.133846  | 64.444435 | H | 54.516703 | 6.938485  | 64.677484 |
| H | 52.821810 | 7.835586  | 64.469881 | H | 52.923240 | 7.873832  | 64.417179 | H | 53.238446 | 7.780848  | 64.606807 |
| O | 56.821767 | 8.988056  | 68.810603 | O | 56.747668 | 9.122181  | 68.838647 | O | 57.133704 | 8.828789  | 69.029020 |
| H | 56.918087 | 8.782066  | 67.838602 | H | 56.885959 | 8.875614  | 67.883376 | H | 57.234822 | 8.524765  | 68.080762 |
| H | 56.582553 | 9.935403  | 68.782566 | H | 56.507753 | 10.066336 | 68.757274 | H | 56.894096 | 9.769406  | 68.917627 |
| H | 54.924045 | 0.435795  | 63.734572 | H | 54.911630 | 0.434850  | 63.728511 | H | 54.781880 | 0.452789  | 63.699924 |
| H | 52.967246 | 9.780520  | 67.117776 | H | 53.055946 | 9.766646  | 66.959137 | H | 53.023017 | 9.592331  | 67.247594 |
| H | 52.126721 | 11.185688 | 66.397246 | H | 52.149652 | 11.119011 | 66.214479 | H | 52.260003 | 11.083331 | 66.628475 |
| H | 59.449815 | 12.693201 | 67.224683 | H | 59.481514 | 12.744392 | 67.153702 | H | 59.565283 | 12.795965 | 67.116365 |

**Siroheme (Fe<sup>3+</sup>) with SO<sub>3</sub><sup>2-</sup>**

| S=1/2 |           |           | S=3/2     |    |           | S=5/2     |           |    |           |           |           |
|-------|-----------|-----------|-----------|----|-----------|-----------|-----------|----|-----------|-----------|-----------|
| C     | 51.422358 | 3.380522  | 70.997438 | C  | 51.422358 | 3.380522  | 70.997438 | C  | 51.422358 | 3.380522  | 70.997438 |
| C     | 51.717113 | 4.139652  | 69.701333 | C  | 51.846597 | 4.075236  | 69.701489 | C  | 51.788495 | 4.084790  | 69.689535 |
| C     | 52.774086 | 5.226159  | 69.891335 | C  | 53.083391 | 4.952050  | 69.889599 | C  | 52.865348 | 5.150323  | 69.885800 |
| N     | 53.057215 | 5.884799  | 68.616735 | N  | 53.455861 | 5.575008  | 68.620849 | N  | 53.199439 | 5.770997  | 68.605441 |
| C     | 54.061164 | 6.753637  | 68.401208 | C  | 54.567212 | 6.307236  | 68.414358 | C  | 54.240669 | 6.595771  | 68.391229 |
| N     | 54.887528 | 7.088698  | 69.398790 | N  | 55.447285 | 6.485242  | 69.408538 | N  | 55.077765 | 6.896168  | 69.392355 |
| N     | 54.234932 | 7.282362  | 67.187916 | N  | 54.796480 | 6.838367  | 67.214681 | N  | 54.444789 | 7.110411  | 67.177656 |
| C     | 55.076348 | 1.425184  | 63.280932 | C  | 55.076348 | 1.425184  | 63.280932 | C  | 55.076348 | 1.425184  | 63.280932 |
| C     | 56.461935 | 1.961461  | 63.634151 | C  | 56.505939 | 1.721810  | 63.727855 | C  | 56.506910 | 1.773045  | 63.687453 |
| C     | 56.673268 | 2.062349  | 65.155104 | C  | 56.620426 | 1.777989  | 65.261971 | C  | 56.663946 | 1.867820  | 65.217721 |
| N     | 57.725244 | 3.004383  | 65.532959 | N  | 57.754154 | 2.565811  | 65.737168 | N  | 57.756095 | 2.740386  | 65.641109 |
| C     | 57.590935 | 4.335803  | 65.381108 | C  | 57.814601 | 3.903671  | 65.588655 | C  | 57.716799 | 4.076790  | 65.475136 |
| N     | 56.397328 | 4.848169  | 65.077065 | N  | 56.733499 | 4.574921  | 65.186345 | N  | 56.583039 | 4.656688  | 65.078227 |
| N     | 58.635525 | 5.152667  | 65.545799 | N  | 58.938221 | 4.573200  | 65.853791 | N  | 58.792901 | 4.830694  | 65.716719 |
| C     | 60.333112 | 3.765595  | 62.506421 | C  | 60.333112 | 3.765595  | 62.506421 | C  | 60.333112 | 3.765595  | 62.506421 |
| C     | 60.256756 | 4.891209  | 61.442682 | C  | 60.256756 | 4.891209  | 61.442682 | C  | 60.256756 | 4.891209  | 61.442682 |
| C     | 60.012123 | 6.275551  | 62.049274 | C  | 60.127506 | 6.281831  | 62.074326 | C  | 60.120463 | 6.284287  | 62.065289 |
| C     | 61.113597 | 6.730773  | 63.006514 | C  | 61.357763 | 6.712761  | 62.875138 | C  | 61.287163 | 6.678015  | 62.974167 |
| N     | 60.822055 | 8.103763  | 63.491679 | N  | 61.057361 | 7.969775  | 63.607228 | N  | 61.013909 | 8.011506  | 63.573600 |
| C     | 55.161658 | 2.803979  | 58.893853 | C  | 55.161658 | 2.803979  | 58.893853 | C  | 55.161658 | 2.803979  | 58.893853 |
| C     | 55.522484 | 3.451533  | 60.237172 | C  | 55.522484 | 3.451533  | 60.237172 | C  | 55.522484 | 3.451533  | 60.237172 |
| C     | 55.865418 | 4.935700  | 60.149458 | C  | 55.960420 | 4.915409  | 60.154682 | C  | 55.945969 | 4.915424  | 60.142666 |
| C     | 56.141005 | 5.469506  | 61.543084 | C  | 56.244135 | 5.435882  | 61.554702 | C  | 56.206772 | 5.448937  | 61.539142 |
| N     | 56.320723 | 6.942775  | 61.590061 | N  | 56.631282 | 6.874523  | 61.602192 | N  | 56.534625 | 6.897249  | 61.583138 |
| Fe    | 56.767126 | 10.590853 | 63.885234 | Fe | 57.339661 | 10.814731 | 63.448241 | Fe | 57.033026 | 10.919742 | 63.724756 |
| C     | 60.168498 | 10.872079 | 63.912035 | C  | 60.763687 | 10.899053 | 63.500409 | C  | 60.489831 | 10.873083 | 63.942334 |
| C     | 56.667413 | 11.757834 | 67.027961 | C  | 57.295112 | 11.845884 | 66.652084 | C  | 56.899677 | 11.620152 | 67.054833 |
| C     | 53.430094 | 9.898938  | 63.968424 | C  | 54.124553 | 9.675091  | 63.737499 | C  | 53.750064 | 9.829249  | 63.845404 |
| C     | 56.853800 | 9.878681  | 60.511022 | C  | 57.381118 | 10.007380 | 60.129284 | C  | 57.250376 | 9.945827  | 60.431005 |
| N     | 58.153628 | 11.019915 | 65.252372 | N  | 58.758763 | 11.167198 | 64.830420 | N  | 58.461744 | 11.071911 | 65.263927 |
| C     | 59.525272 | 10.861515 | 65.108015 | C  | 60.123231 | 10.971316 | 64.699473 | C  | 59.823526 | 10.884467 | 65.137216 |
| C     | 60.186796 | 10.803609 | 66.473314 | C  | 60.782819 | 10.997450 | 66.070639 | C  | 60.451298 | 10.772270 | 66.521167 |
| C     | 60.028257 | 9.389328  | 67.079494 | C  | 60.570572 | 9.662515  | 66.822667 | C  | 60.269066 | 9.338464  | 67.073987 |
| C     | 61.652373 | 11.240351 | 66.495866 | C  | 62.259538 | 11.387067 | 66.071615 | C  | 61.919927 | 11.190839 | 66.611632 |
| C     | 62.748545 | 10.355318 | 65.833552 | C  | 63.322233 | 10.374014 | 65.558124 | C  | 63.023172 | 10.249107 | 66.045059 |

|   |           |           |           |   |           |           |           |   |           |           |           |
|---|-----------|-----------|-----------|---|-----------|-----------|-----------|---|-----------|-----------|-----------|
| O | 62.452906 | 9.236254  | 65.278660 | O | 62.967624 | 9.291521  | 64.970723 | O | 62.719077 | 9.260982  | 65.287709 |
| O | 63.910888 | 10.819892 | 65.908776 | O | 64.512932 | 10.713527 | 65.759420 | O | 64.194361 | 10.552745 | 66.378842 |
| C | 59.219752 | 11.751405 | 67.225414 | C | 59.838063 | 12.035027 | 66.731221 | C | 59.462152 | 11.685623 | 67.296234 |
| C | 57.920847 | 11.507065 | 66.491453 | C | 58.531892 | 11.698364 | 66.057842 | C | 58.178986 | 11.461363 | 66.526459 |
| N | 55.308206 | 10.775146 | 65.254878 | N | 55.964187 | 10.733145 | 64.936004 | N | 55.556875 | 10.704203 | 65.231467 |
| C | 55.462320 | 11.382379 | 66.462533 | C | 56.124087 | 11.296137 | 66.162369 | C | 55.694496 | 11.238253 | 66.469403 |
| C | 54.122201 | 11.640199 | 67.138168 | C | 54.845646 | 11.265054 | 66.981929 | C | 54.341237 | 11.407143 | 67.149073 |
| C | 54.110475 | 11.389176 | 68.645716 | C | 55.064446 | 10.843617 | 68.436909 | C | 54.320952 | 11.046538 | 68.634235 |
| C | 53.747435 | 13.115643 | 66.810356 | C | 54.216576 | 12.684751 | 66.887331 | C | 53.940595 | 12.895908 | 66.922392 |
| C | 52.340642 | 13.492273 | 67.334000 | C | 52.855532 | 12.758818 | 67.626095 | C | 52.533215 | 13.210408 | 67.489456 |
| O | 52.289105 | 14.147166 | 68.414541 | O | 52.852822 | 13.322238 | 68.757100 | O | 52.489384 | 13.819785 | 68.595679 |
| O | 51.353649 | 13.090439 | 66.644376 | O | 51.864204 | 12.228284 | 67.038908 | O | 51.545067 | 12.809429 | 66.802993 |
| C | 53.220017 | 10.657865 | 66.370682 | C | 54.014239 | 10.238031 | 66.194686 | C | 53.460922 | 10.469133 | 66.295512 |
| C | 53.988446 | 10.408380 | 65.107717 | C | 54.699478 | 10.183876 | 64.866609 | C | 54.257544 | 10.305588 | 65.031991 |
| N | 55.430296 | 9.953991  | 62.527587 | N | 56.036731 | 9.960219  | 62.199208 | N | 55.754735 | 9.974236  | 62.400030 |
| C | 54.099226 | 9.704003  | 62.747322 | C | 54.739729 | 9.591104  | 62.477169 | C | 54.433160 | 9.678435  | 62.614557 |
| C | 53.460334 | 9.286500  | 61.534436 | C | 54.085413 | 9.144492  | 61.287356 | C | 53.831539 | 9.251774  | 61.384107 |
| C | 54.417731 | 9.322035  | 60.543991 | C | 54.989482 | 9.288374  | 60.251820 | C | 54.805965 | 9.327077  | 60.406663 |
| C | 55.639503 | 9.745605  | 61.165180 | C | 56.199213 | 9.792123  | 60.821233 | C | 56.008354 | 9.782074  | 61.044985 |
| N | 58.220085 | 10.397970 | 62.492052 | N | 58.767946 | 10.546635 | 62.090082 | N | 58.588145 | 10.511933 | 62.417780 |
| C | 58.053719 | 10.195625 | 61.124680 | C | 58.583483 | 10.349582 | 60.720066 | C | 58.449753 | 10.282598 | 61.055544 |
| C | 59.305299 | 10.365688 | 60.447946 | C | 59.835802 | 10.466328 | 60.040102 | C | 59.735623 | 10.385535 | 60.428095 |
| C | 60.234233 | 10.697563 | 61.407691 | C | 60.792415 | 10.716013 | 60.996853 | C | 60.648719 | 10.672457 | 61.422039 |
| C | 59.539763 | 10.719059 | 62.664329 | C | 60.116691 | 10.769885 | 62.258306 | C | 59.914291 | 10.748322 | 62.656734 |
| S | 56.995443 | 8.386361  | 64.786012 | S | 57.716257 | 8.077421  | 64.992980 | S | 57.354701 | 8.166655  | 64.891797 |
| O | 58.349439 | 7.727306  | 64.549029 | O | 58.992386 | 7.221625  | 65.167476 | O | 58.694888 | 7.414482  | 64.784144 |
| O | 55.982273 | 7.380968  | 64.129070 | O | 56.740430 | 7.109041  | 64.188809 | O | 56.346059 | 7.196105  | 64.135938 |
| O | 56.694322 | 8.307076  | 66.263301 | O | 57.064665 | 8.175960  | 66.370974 | O | 56.915016 | 8.046926  | 66.348260 |
| C | 54.634215 | 12.941636 | 61.407585 | C | 54.634215 | 12.941636 | 61.407585 | C | 54.634215 | 12.941636 | 61.407585 |
| C | 54.882510 | 13.083917 | 62.909163 | C | 55.130251 | 13.190421 | 62.827868 | C | 54.898733 | 13.202302 | 62.886624 |
| S | 56.600366 | 12.695863 | 63.390436 | S | 56.952549 | 13.055219 | 62.972716 | S | 56.687866 | 13.132634 | 63.298346 |
| H | 56.278339 | 5.851414  | 64.819810 | H | 56.788933 | 5.576936  | 64.890660 | H | 56.540825 | 5.666004  | 64.804877 |
| H | 50.653307 | 2.616501  | 70.831769 | H | 50.528595 | 2.767098  | 70.833050 | H | 50.647557 | 2.623491  | 70.826512 |
| H | 51.060256 | 4.058531  | 71.782047 | H | 51.188878 | 4.112385  | 71.783065 | H | 51.037647 | 4.093967  | 71.738802 |
| H | 52.322868 | 2.876834  | 71.374891 | H | 52.218421 | 2.723077  | 71.373866 | H | 52.295685 | 2.877428  | 71.434478 |
| H | 52.067136 | 3.438412  | 68.928860 | H | 52.058831 | 3.325254  | 68.924267 | H | 52.149635 | 3.349769  | 68.954694 |
| H | 50.794448 | 4.603046  | 69.320718 | H | 51.022111 | 4.701340  | 69.327026 | H | 50.893849 | 4.558426  | 69.257655 |
| H | 52.426550 | 5.963994  | 70.632671 | H | 52.881384 | 5.724333  | 70.650649 | H | 52.515523 | 5.912165  | 70.601561 |
| H | 53.701865 | 4.773076  | 70.274846 | H | 53.924283 | 4.337534  | 70.247018 | H | 53.771038 | 4.684425  | 70.303896 |
| H | 55.592429 | 7.839067  | 69.251412 | H | 56.263666 | 7.114577  | 69.275172 | H | 55.805198 | 7.626499  | 69.253197 |
| H | 54.673808 | 6.804915  | 70.345946 | H | 55.177484 | 6.254766  | 70.356261 | H | 54.830295 | 6.645184  | 70.340702 |
| H | 55.120174 | 7.756297  | 66.946906 | H | 55.685018 | 7.326890  | 66.991681 | H | 55.358238 | 7.540374  | 66.936156 |
| H | 53.704285 | 6.948816  | 66.371505 | H | 54.243256 | 6.587103  | 66.387561 | H | 53.916354 | 6.787652  | 66.357792 |
| H | 54.964730 | 1.301607  | 62.197937 | H | 55.014933 | 1.316007  | 62.192475 | H | 54.992864 | 1.294627  | 62.196239 |
| H | 54.288601 | 2.109130  | 63.626780 | H | 54.394116 | 2.234172  | 63.578758 | H | 54.377295 | 2.218561  | 63.580466 |
| H | 56.589878 | 2.959183  | 63.191727 | H | 56.828686 | 2.686015  | 63.309606 | H | 56.789773 | 2.736255  | 63.240682 |
| H | 57.249277 | 1.328652  | 63.202541 | H | 57.203501 | 0.966850  | 63.340343 | H | 57.216167 | 1.031742  | 63.296242 |
| H | 56.944605 | 1.089968  | 65.578809 | H | 56.727383 | 0.772776  | 65.682921 | H | 56.852813 | 0.881506  | 65.653601 |
| H | 55.737428 | 2.355065  | 65.656581 | H | 55.695737 | 2.186732  | 65.699834 | H | 55.727559 | 2.222289  | 65.677647 |
| H | 55.593411 | 4.240010  | 65.005528 | H | 55.856122 | 4.089375  | 65.060329 | H | 55.746919 | 4.099501  | 64.970407 |
| H | 59.554949 | 4.763351  | 65.708575 | H | 59.793629 | 4.066234  | 66.041147 | H | 59.680948 | 4.383817  | 65.905086 |
| H | 58.548269 | 6.161614  | 65.296891 | H | 58.978935 | 5.603626  | 65.668352 | H | 58.778524 | 5.846607  | 65.460646 |
| H | 60.452391 | 2.785532  | 62.028605 | H | 60.348232 | 2.777811  | 62.030150 | H | 60.339988 | 2.777932  | 62.029330 |
| H | 59.413396 | 3.737489  | 63.107764 | H | 59.463073 | 3.808556  | 63.175587 | H | 59.466513 | 3.810630  | 63.180399 |
| H | 61.180422 | 3.908134  | 63.188501 | H | 61.234698 | 3.850214  | 63.124787 | H | 61.239824 | 3.845415  | 63.118207 |
| H | 61.187471 | 4.905076  | 60.856618 | H | 61.144465 | 4.853899  | 60.794376 | H | 61.149694 | 4.853245  | 60.801495 |
| H | 59.448148 | 4.665988  | 60.732440 | H | 59.390707 | 4.713251  | 60.788706 | H | 59.395682 | 4.711229  | 60.782761 |
| H | 59.061505 | 6.281013  | 62.606296 | H | 59.263905 | 6.290316  | 62.758539 | H | 59.203793 | 6.328450  | 62.674105 |

|   |           |           |           |   |           |           |           |   |           |           |           |
|---|-----------|-----------|-----------|---|-----------|-----------|-----------|---|-----------|-----------|-----------|
| H | 59.919106 | 7.021438  | 61.243500 | H | 59.940355 | 7.038057  | 61.294127 | H | 60.024948 | 7.042432  | 61.270830 |
| H | 62.094007 | 6.737539  | 62.516502 | H | 62.223192 | 6.878947  | 62.224298 | H | 62.233481 | 6.725705  | 62.423350 |
| H | 61.180634 | 6.081393  | 63.885642 | H | 61.632419 | 5.963303  | 63.624346 | H | 61.408202 | 5.971757  | 63.801982 |
| H | 60.798018 | 8.763641  | 62.701842 | H | 60.734979 | 8.700069  | 62.958212 | H | 60.904809 | 8.719296  | 62.834046 |
| H | 61.502947 | 8.511831  | 64.216143 | H | 61.857953 | 8.419702  | 64.153438 | H | 61.735670 | 8.402181  | 64.250522 |
| H | 54.919548 | 1.741931  | 59.024359 | H | 54.852264 | 1.761111  | 59.036642 | H | 54.864408 | 1.756916  | 59.032342 |
| H | 55.995907 | 2.875481  | 58.182695 | H | 56.018202 | 2.811607  | 58.206007 | H | 56.014561 | 2.824607  | 58.201733 |
| H | 54.290526 | 3.296905  | 58.441101 | H | 54.334607 | 3.338826  | 58.407411 | H | 54.326297 | 3.332342  | 58.414408 |
| H | 56.373346 | 2.912143  | 60.682240 | H | 56.327125 | 2.869562  | 60.713974 | H | 56.333247 | 2.876262  | 60.711511 |
| H | 54.680665 | 3.328688  | 60.935298 | H | 54.656339 | 3.385723  | 60.913071 | H | 54.658777 | 3.381132  | 60.915610 |
| H | 55.022775 | 5.490264  | 59.708550 | H | 55.169120 | 5.522804  | 59.689310 | H | 55.151063 | 5.509207  | 59.665936 |
| H | 56.736869 | 5.096794  | 59.497104 | H | 56.857673 | 5.013203  | 59.524081 | H | 56.846803 | 5.018279  | 59.518588 |
| H | 57.041294 | 5.017906  | 61.979640 | H | 57.057906 | 4.873788  | 62.032377 | H | 57.035905 | 4.917734  | 62.024764 |
| H | 55.300908 | 5.245093  | 62.211098 | H | 55.357372 | 5.341775  | 62.193624 | H | 55.319796 | 5.321244  | 62.171414 |
| H | 57.205881 | 7.259548  | 61.180615 | H | 57.501063 | 7.060016  | 61.093321 | H | 57.436331 | 7.113679  | 61.148127 |
| H | 56.259812 | 7.258539  | 62.629386 | H | 56.758307 | 7.144673  | 62.651569 | H | 56.542054 | 7.188137  | 62.641555 |
| H | 61.253701 | 10.913311 | 63.911379 | H | 61.849187 | 10.863266 | 63.494959 | H | 61.575579 | 10.852406 | 63.983602 |
| H | 56.634047 | 12.251246 | 67.998128 | H | 57.263207 | 12.307101 | 67.636015 | H | 56.842119 | 12.041253 | 68.057759 |
| H | 52.355471 | 9.715025  | 63.979244 | H | 53.078268 | 9.374136  | 63.798970 | H | 52.680420 | 9.616239  | 63.826260 |
| H | 56.863421 | 9.722443  | 59.432544 | H | 57.370037 | 9.858551  | 59.050391 | H | 57.289510 | 9.768063  | 59.356237 |
| H | 60.632910 | 8.666493  | 66.527329 | H | 61.126629 | 8.849583  | 66.352885 | H | 60.861798 | 8.622942  | 66.501117 |
| H | 58.982211 | 9.068959  | 67.065748 | H | 59.509430 | 9.394066  | 66.864770 | H | 59.218703 | 9.032735  | 67.048818 |
| H | 60.373206 | 9.411776  | 68.122494 | H | 60.935250 | 9.781253  | 67.852089 | H | 60.610443 | 9.319746  | 68.118004 |
| H | 61.751462 | 12.241804 | 66.051651 | H | 62.404166 | 12.313371 | 65.494836 | H | 62.065920 | 12.169523 | 66.128738 |
| H | 61.964914 | 11.350085 | 67.545362 | H | 62.554430 | 11.629455 | 67.102809 | H | 62.174812 | 11.341151 | 67.670377 |
| H | 59.146900 | 11.543186 | 68.299288 | H | 59.791365 | 11.960056 | 67.823186 | H | 59.376826 | 11.436160 | 68.359751 |
| H | 54.394265 | 10.351792 | 68.868603 | H | 55.574503 | 9.872558  | 68.477311 | H | 54.626126 | 10.002654 | 68.784632 |
| H | 53.102764 | 11.560529 | 69.043856 | H | 54.096298 | 10.751092 | 68.944297 | H | 53.306329 | 11.167118 | 69.032991 |
| H | 54.785912 | 12.069274 | 69.180451 | H | 55.655864 | 11.581217 | 68.993115 | H | 54.976103 | 11.701709 | 69.222481 |
| H | 53.777032 | 13.247606 | 65.720007 | H | 54.069232 | 12.934120 | 65.826844 | H | 53.952206 | 13.098737 | 65.842308 |
| H | 54.500741 | 13.773215 | 67.262749 | H | 54.913305 | 13.410445 | 67.324836 | H | 54.686674 | 13.537738 | 67.407455 |
| H | 52.408162 | 9.033683  | 61.445221 | H | 53.057220 | 8.798805  | 61.239012 | H | 52.792661 | 8.958428  | 61.267230 |
| H | 54.303473 | 9.108786  | 59.484859 | H | 54.844930 | 9.073734  | 59.197143 | H | 54.704659 | 9.116004  | 59.345802 |
| H | 59.449193 | 10.256649 | 59.377043 | H | 59.967948 | 10.354212 | 58.968091 | H | 59.924020 | 10.255444 | 59.366381 |
| H | 61.289976 | 10.919846 | 61.280349 | H | 61.861599 | 10.851720 | 60.865934 | H | 61.720019 | 10.823428 | 61.324413 |
| H | 54.772548 | 11.911571 | 61.073368 | H | 54.912426 | 11.942074 | 61.060817 | H | 55.009060 | 11.961544 | 61.103285 |
| H | 54.206366 | 12.440518 | 63.484095 | H | 54.675804 | 12.477308 | 63.526458 | H | 54.370882 | 12.472797 | 63.512364 |
| H | 54.711741 | 14.119544 | 63.233974 | H | 54.860049 | 14.199744 | 63.164425 | H | 54.553304 | 14.201684 | 63.179709 |
| H | 52.445112 | 5.682196  | 67.833902 | H | 52.770976 | 5.559538  | 67.872607 | H | 52.570652 | 5.610401  | 67.825941 |
| H | 58.648086 | 2.643860  | 65.745538 | H | 58.595058 | 2.085343  | 66.035342 | H | 58.629386 | 2.324955  | 65.942265 |
| H | 59.860456 | 8.131577  | 63.918184 | H | 60.253399 | 7.781567  | 64.278339 | H | 60.086063 | 7.960224  | 64.085851 |
| H | 55.569829 | 7.447908  | 61.088510 | H | 55.903288 | 7.482843  | 61.185456 | H | 55.823137 | 7.475065  | 61.103350 |
| H | 53.604630 | 13.248236 | 61.172032 | H | 53.538029 | 13.029165 | 61.368619 | H | 53.552560 | 12.976683 | 61.211402 |
| H | 55.318977 | 13.582452 | 60.836741 | H | 55.062159 | 13.674068 | 60.710085 | H | 55.121166 | 13.703070 | 60.784044 |
| O | 53.385298 | 6.802888  | 64.512174 | O | 54.125905 | 6.603366  | 64.452906 | O | 53.727566 | 6.727871  | 64.440959 |
| H | 54.315744 | 7.120891  | 64.345302 | H | 55.078891 | 6.901257  | 64.379538 | H | 54.685617 | 6.993807  | 64.333411 |
| H | 52.860173 | 7.604564  | 64.328568 | H | 53.637613 | 7.416136  | 64.224480 | H | 53.261785 | 7.563025  | 64.246096 |
| O | 56.816141 | 9.043222  | 68.813534 | O | 57.691126 | 8.140546  | 68.915774 | O | 57.074745 | 8.811606  | 68.857901 |
| H | 56.919098 | 8.906913  | 67.834369 | H | 57.608333 | 8.245222  | 67.921915 | H | 57.162041 | 8.650592  | 67.876154 |
| H | 56.569073 | 9.983054  | 68.882315 | H | 57.669694 | 9.044176  | 69.272795 | H | 56.825946 | 9.750771  | 68.915587 |
| H | 54.896669 | 0.446754  | 63.747714 | H | 54.704046 | 0.493550  | 63.729998 | H | 54.743112 | 0.491992  | 63.755322 |
| H | 53.124168 | 9.712599  | 66.928909 | H | 54.075977 | 9.248445  | 66.674493 | H | 53.358344 | 9.489549  | 66.788884 |
| H | 52.220244 | 11.071227 | 66.192697 | H | 52.959201 | 10.531270 | 66.129012 | H | 52.462083 | 10.890410 | 66.130781 |
| H | 59.522182 | 12.803673 | 67.093712 | H | 60.133952 | 13.061302 | 66.457217 | H | 59.754451 | 12.745229 | 67.208127 |

**Siroheme (Fe<sup>2+</sup>) with NO<sub>2</sub><sup>-</sup>**

| <b>S=0</b> |           |            |           | <b>S=1</b> |           |            |           | <b>S=2</b> |           |            |           |
|------------|-----------|------------|-----------|------------|-----------|------------|-----------|------------|-----------|------------|-----------|
| C          | 50.353397 | -52.121132 | 49.522288 | C          | 50.353397 | -52.121132 | 49.522288 | C          | 50.353397 | -52.121132 | 49.522288 |
| C          | 50.567796 | -50.635888 | 49.830888 | C          | 50.413763 | -50.597610 | 49.633585 | C          | 50.474388 | -50.600324 | 49.634689 |





|   |           |            |           |   |           |            |           |   |           |            |           |
|---|-----------|------------|-----------|---|-----------|------------|-----------|---|-----------|------------|-----------|
| H | 49.226857 | -44.276644 | 49.226599 | H | 49.002805 | -43.882888 | 48.765256 | H | 48.931504 | -43.962574 | 49.437490 |
| H | 50.325924 | -44.825798 | 50.492204 | H | 49.927755 | -44.608943 | 50.083128 | H | 50.016902 | -44.744777 | 50.589475 |
| H | 50.677606 | -41.067823 | 50.641592 | H | 50.483211 | -40.895740 | 50.596753 | H | 50.716997 | -41.086903 | 51.170046 |
| H | 50.473131 | -42.524160 | 51.648967 | H | 49.992961 | -42.398882 | 51.423138 | H | 50.321657 | -42.623548 | 51.984517 |
| H | 53.286283 | -38.409452 | 45.498177 | H | 54.020657 | -38.233119 | 45.957385 | H | 53.552590 | -38.451551 | 45.771044 |
| H | 55.993239 | -38.112249 | 45.423067 | H | 56.725180 | -38.172831 | 46.301526 | H | 56.257237 | -38.241004 | 45.905909 |
| H | 60.035091 | -40.307028 | 48.034058 | H | 60.177846 | -41.186052 | 48.938422 | H | 60.040180 | -40.742975 | 48.716386 |
| H | 60.247216 | -42.354322 | 49.824515 | H | 59.954223 | -43.519613 | 50.332176 | H | 60.088167 | -42.946094 | 50.308258 |
| H | 52.534026 | -39.533497 | 49.932618 | H | 52.624464 | -39.548837 | 49.916740 | H | 52.627333 | -39.573135 | 49.923476 |
| H | 53.347834 | -41.229234 | 51.642245 | H | 53.024935 | -41.235350 | 51.777712 | H | 53.025357 | -41.212365 | 51.826863 |
| H | 54.138580 | -39.930105 | 52.537403 | H | 53.835195 | -39.979622 | 52.723626 | H | 53.829267 | -39.933359 | 52.742895 |
| H | 51.177226 | -48.193971 | 49.885324 | H | 50.928901 | -48.148859 | 49.736975 | H | 51.120284 | -48.196905 | 49.976592 |
| H | 56.066622 | -48.921835 | 43.896662 | H | 55.331652 | -49.530593 | 44.620882 | H | 56.050508 | -48.908208 | 44.031131 |
| H | 57.679139 | -43.726946 | 46.992213 | H | 57.202099 | -43.753798 | 46.990110 | H | 57.490381 | -43.657148 | 47.014680 |
| H | 53.418162 | -41.875241 | 45.843429 | H | 53.433490 | -41.658246 | 45.802499 | H | 53.304850 | -41.939654 | 45.893129 |
| H | 51.937906 | -39.141106 | 51.565285 | H | 51.886666 | -39.008597 | 51.442836 | H | 51.884378 | -38.996525 | 51.433354 |
| H | 53.305871 | -38.238028 | 50.867099 | H | 53.423329 | -38.300496 | 50.890320 | H | 53.422527 | -38.301313 | 50.868809 |
| O | 52.157992 | -45.267909 | 46.307346 | O | 52.179759 | -45.601738 | 45.985373 | O | 51.839894 | -44.505214 | 46.547156 |
| H | 52.809798 | -44.923671 | 46.976373 | H | 52.699331 | -45.123252 | 46.701050 | H | 52.658652 | -44.497478 | 47.125035 |
| H | 51.291238 | -44.919859 | 46.575203 | H | 51.411727 | -45.991909 | 46.435264 | H | 51.243223 | -43.847139 | 46.942153 |
| O | 56.628479 | -46.888493 | 48.518151 | O | 56.371995 | -46.761167 | 48.623307 | O | 56.496672 | -46.759318 | 48.662371 |
| H | 56.519986 | -45.914236 | 48.257507 | H | 56.197650 | -45.820482 | 48.281130 | H | 56.385579 | -45.800364 | 48.340525 |
| H | 57.099095 | -46.880502 | 49.372057 | H | 56.764658 | -46.641861 | 49.507833 | H | 56.970586 | -46.701503 | 49.512154 |
| H | 51.917207 | -47.996038 | 41.952943 | H | 51.659981 | -47.964326 | 42.162158 | H | 51.906832 | -47.998621 | 41.964857 |
| H | 54.694123 | -43.795599 | 53.271108 | H | 54.045783 | -44.161613 | 53.387673 | H | 54.319356 | -44.345800 | 53.482142 |
| H | 54.167939 | -45.383109 | 52.679952 | H | 53.296988 | -45.604034 | 52.678494 | H | 53.757263 | -45.860596 | 52.756973 |
| H | 50.665067 | -42.922114 | 47.381842 | H | 50.733822 | -42.529573 | 47.211351 | H | 50.283530 | -42.473329 | 47.724052 |
| H | 50.022069 | -41.474027 | 48.175010 | H | 50.154786 | -41.055653 | 48.015870 | H | 50.070443 | -41.054198 | 48.728202 |

**Siroheme (Fe<sup>3+</sup>) with NO<sub>2</sub><sup>-</sup>**

| <b>S=1/2</b> |           |            | <b>S=3/2</b> |    |           | <b>S=5/2</b> |           |    |           |            |           |
|--------------|-----------|------------|--------------|----|-----------|--------------|-----------|----|-----------|------------|-----------|
| C            | 50.353397 | -52.121132 | 49.522288    | C  | 50.353397 | -52.121132   | 49.522288 | C  | 50.353397 | -52.121132 | 49.522288 |
| C            | 50.630668 | -50.630103 | 49.730113    | C  | 50.654511 | -50.642685   | 49.780482 | C  | 50.625095 | -50.631844 | 49.751008 |
| C            | 52.117653 | -50.289865 | 49.630498    | C  | 52.140240 | -50.315299   | 49.634507 | C  | 52.088376 | -50.262238 | 49.512500 |
| N            | 52.313091 | -48.847993 | 49.813523    | N  | 52.358761 | -48.880415   | 49.842559 | N  | 52.277864 | -48.818777 | 49.697249 |
| C            | 53.431051 | -48.174802 | 49.530842    | C  | 53.475424 | -48.215724   | 49.535040 | C  | 53.403579 | -48.150654 | 49.438982 |
| N            | 54.508878 | -48.804340 | 49.052943    | N  | 54.532199 | -48.852931   | 49.020070 | N  | 54.482492 | -48.788414 | 48.969530 |
| N            | 53.483690 | -46.845711 | 49.730241    | N  | 53.548156 | -46.889538   | 49.743947 | N  | 53.470265 | -46.824132 | 49.652732 |
| C            | 52.225000 | -47.068010 | 42.455410    | C  | 52.225000 | -47.068010   | 42.455410 | C  | 52.225000 | -47.068010 | 42.455410 |
| C            | 53.541465 | -47.653323 | 42.953001    | C  | 53.531709 | -47.686644   | 42.938290 | C  | 53.713236 | -46.913071 | 42.751939 |
| C            | 53.291641 | -48.726166 | 44.015848    | C  | 53.265664 | -48.770732   | 43.986319 | C  | 54.338356 | -48.265004 | 43.101018 |
| N            | 54.514164 | -49.227453 | 44.641561    | N  | 54.481605 | -49.295998   | 44.605856 | N  | 55.716317 | -48.173907 | 43.580348 |
| C            | 55.223967 | -48.528651 | 45.535543    | C  | 55.203289 | -48.612074   | 45.501702 | C  | 56.050011 | -48.008607 | 44.863509 |
| N            | 54.751565 | -47.372493 | 46.010642    | N  | 54.747438 | -47.453049   | 45.986234 | N  | 55.111167 | -47.781490 | 45.790355 |
| N            | 56.420670 | -48.963885 | 45.951204    | N  | 56.394608 | -49.065877   | 45.911692 | N  | 57.335247 | -48.078802 | 45.244831 |
| C            | 57.646397 | -45.007662 | 42.604348    | C  | 57.646397 | -45.007662   | 42.604348 | C  | 57.646397 | -45.007662 | 42.604348 |
| C            | 57.606397 | -43.479422 | 42.863688    | C  | 57.606397 | -43.479422   | 42.863688 | C  | 57.606397 | -43.479422 | 42.863688 |
| C            | 57.675007 | -43.134195 | 44.359226    | C  | 57.683894 | -43.134697   | 44.357634 | C  | 57.700394 | -43.139308 | 44.357196 |
| C            | 58.968215 | -43.606181 | 45.011394    | C  | 58.982978 | -43.599914   | 45.001830 | C  | 59.000588 | -43.619538 | 44.988560 |
| N            | 58.947018 | -43.345216 | 46.485260    | N  | 58.948673 | -43.367132   | 46.479887 | N  | 58.986218 | -43.375395 | 46.464628 |
| C            | 51.838000 | -42.751710 | 40.914430    | C  | 51.838000 | -42.751710   | 40.914430 | C  | 51.838000 | -42.751710 | 40.914430 |
| C            | 52.531000 | -43.413060 | 42.112930    | C  | 52.531000 | -43.413060   | 42.112930 | C  | 52.531000 | -43.413060 | 42.112930 |
| C            | 53.159390 | -42.477818 | 43.146884    | C  | 53.159464 | -42.486592   | 43.156935 | C  | 53.191459 | -42.482805 | 43.134022 |
| C            | 53.881920 | -43.327756 | 44.184124    | C  | 53.884875 | -43.348842   | 44.183494 | C  | 53.897227 | -43.343676 | 44.174182 |
| N            | 54.398639 | -42.510196 | 45.324823    | N  | 54.410114 | -42.554019   | 45.337946 | N  | 54.443401 | -42.551002 | 45.317337 |
| Fe           | 55.388211 | -41.530480 | 48.735533    | Fe | 55.422891 | -41.633912   | 48.896445 | Fe | 55.479721 | -41.237824 | 48.786455 |
| C            | 58.199095 | -42.785041 | 50.203463    | C  | 58.252068 | -43.004956   | 50.254163 | C  | 58.272978 | -42.740616 | 50.138036 |
| C            | 53.476307 | -43.529654 | 50.703268    | C  | 53.519894 | -43.691002   | 50.807634 | C  | 53.519268 | -43.511176 | 50.492234 |
| C            | 52.584862 | -40.605506 | 47.001477    | C  | 52.605712 | -40.737048   | 47.123226 | C  | 52.704796 | -40.452320 | 46.828728 |





|   |           |            |           |   |           |            |           |   |           |            |           |
|---|-----------|------------|-----------|---|-----------|------------|-----------|---|-----------|------------|-----------|
| H | 57.473943 | -45.223400 | 41.543223 | H | 57.463861 | -45.223976 | 41.544993 | H | 57.453085 | -45.225350 | 41.547108 |
| H | 56.867419 | -45.521516 | 43.186288 | H | 56.874116 | -45.522778 | 43.194157 | H | 56.878509 | -45.521165 | 43.201192 |
| H | 58.615164 | -45.443821 | 42.876116 | H | 58.618557 | -45.442130 | 42.866601 | H | 58.620815 | -45.441699 | 42.858465 |
| H | 58.431646 | -42.986046 | 42.331119 | H | 58.427545 | -42.985521 | 42.325145 | H | 58.420742 | -42.984331 | 42.316281 |
| H | 56.678986 | -43.059721 | 42.450192 | H | 56.675972 | -43.060750 | 42.455825 | H | 56.670444 | -43.063078 | 42.466549 |
| H | 56.838455 | -43.629870 | 44.877032 | H | 56.853604 | -43.634302 | 44.880922 | H | 56.870810 | -43.633307 | 44.886799 |
| H | 57.566441 | -42.048717 | 44.508606 | H | 57.571478 | -42.050008 | 44.508066 | H | 57.598473 | -42.054144 | 44.512980 |
| H | 59.841511 | -43.092887 | 44.595123 | H | 59.849865 | -43.066351 | 44.598438 | H | 59.870756 | -43.102021 | 44.571462 |
| H | 59.106459 | -44.684396 | 44.888796 | H | 59.137407 | -44.673584 | 44.860879 | H | 59.137177 | -44.696517 | 44.853054 |
| H | 58.970762 | -42.329715 | 46.700217 | H | 58.930694 | -42.356803 | 46.710045 | H | 58.992435 | -42.362059 | 46.682126 |
| H | 59.765598 | -43.753821 | 46.947225 | H | 59.777993 | -43.755021 | 46.940415 | H | 59.811759 | -43.776527 | 46.920059 |
| H | 51.424472 | -43.515631 | 40.244821 | H | 51.428579 | -43.516862 | 40.243791 | H | 51.400339 | -43.515530 | 40.260157 |
| H | 52.541562 | -42.137649 | 40.335809 | H | 52.540095 | -42.134425 | 40.337433 | H | 52.547291 | -42.160461 | 40.319269 |
| H | 51.012836 | -42.103213 | 41.238835 | H | 51.009760 | -42.106552 | 41.237820 | H | 51.030906 | -42.081651 | 41.240347 |
| H | 53.318124 | -44.085880 | 41.735003 | H | 53.319003 | -44.083973 | 41.733307 | H | 53.295488 | -44.110630 | 41.735213 |
| H | 51.808348 | -44.059585 | 42.632687 | H | 51.808535 | -44.063298 | 42.628393 | H | 51.796653 | -44.031009 | 42.651192 |
| H | 52.382417 | -41.870802 | 43.636429 | H | 52.382360 | -41.886641 | 43.654624 | H | 52.434188 | -41.851107 | 43.622580 |
| H | 53.865326 | -41.780973 | 42.669671 | H | 53.863999 | -41.783769 | 42.686354 | H | 53.912929 | -41.809397 | 42.646495 |
| H | 54.739519 | -43.849852 | 43.742906 | H | 54.739343 | -43.867875 | 43.732360 | H | 54.738475 | -43.889590 | 43.729351 |
| H | 53.213240 | -44.078351 | 44.622345 | H | 53.216680 | -44.104357 | 44.614188 | H | 53.214126 | -44.081978 | 44.611536 |
| H | 55.049076 | -41.774478 | 45.019256 | H | 55.052521 | -41.808064 | 45.042023 | H | 55.107859 | -41.827383 | 45.015351 |
| H | 54.894385 | -43.083865 | 46.055912 | H | 54.917677 | -43.150075 | 46.047311 | H | 54.937906 | -43.162852 | 46.024569 |
| H | 59.096840 | -43.201914 | 50.661729 | H | 59.152408 | -43.442197 | 50.687914 | H | 59.159038 | -43.130909 | 50.653296 |
| H | 52.856267 | -44.072017 | 51.414420 | H | 52.902637 | -44.234443 | 51.520118 | H | 52.881575 | -44.081650 | 51.165721 |
| H | 51.695202 | -40.285993 | 46.461110 | H | 51.715096 | -40.412904 | 46.587945 | H | 51.825224 | -40.110044 | 46.284952 |
| H | 57.936568 | -39.009509 | 45.953022 | H | 57.947496 | -39.031583 | 46.179901 | H | 58.126638 | -39.022786 | 45.800888 |
| H | 57.956855 | -45.892872 | 50.637455 | H | 58.015393 | -46.110538 | 50.647864 | H | 58.113093 | -45.802094 | 50.451016 |
| H | 56.192164 | -45.834466 | 50.296226 | H | 56.250020 | -46.049857 | 50.308667 | H | 56.363254 | -45.815760 | 50.096412 |
| H | 56.784399 | -46.522165 | 51.827849 | H | 56.844370 | -46.758604 | 51.829387 | H | 56.977374 | -46.541823 | 51.608289 |
| H | 57.950070 | -43.175094 | 53.204598 | H | 58.017733 | -43.430989 | 53.247831 | H | 58.057416 | -43.178953 | 53.041506 |
| H | 57.439656 | -44.759941 | 53.761053 | H | 57.509193 | -45.022396 | 53.787076 | H | 57.389365 | -44.697484 | 53.682728 |
| H | 51.469628 | -45.139150 | 48.682116 | H | 51.416679 | -45.257234 | 48.809282 | H | 51.591013 | -44.900674 | 48.236469 |
| H | 49.835381 | -44.624606 | 49.155235 | H | 49.818166 | -44.703397 | 49.350283 | H | 49.920247 | -44.497915 | 48.709861 |
| H | 51.007578 | -45.007564 | 50.412907 | H | 51.028572 | -45.122241 | 50.559141 | H | 51.057118 | -45.013684 | 49.949922 |
| H | 50.931200 | -41.236374 | 50.450362 | H | 51.039200 | -41.340855 | 50.595838 | H | 50.942583 | -41.320407 | 50.561077 |
| H | 50.923474 | -42.677193 | 51.502439 | H | 50.982624 | -42.783069 | 51.645099 | H | 50.939870 | -42.914869 | 51.361081 |
| H | 53.094259 | -38.502950 | 45.151552 | H | 53.109940 | -38.596526 | 45.312248 | H | 53.307466 | -38.464830 | 44.827869 |
| H | 55.764196 | -38.062894 | 44.814465 | H | 55.775728 | -38.089516 | 45.040803 | H | 55.981413 | -38.077394 | 44.546696 |
| H | 60.099021 | -39.838368 | 47.187149 | H | 60.115756 | -39.883508 | 47.394213 | H | 60.280663 | -39.831765 | 47.124934 |
| H | 60.568382 | -41.569859 | 49.248400 | H | 60.606315 | -41.717337 | 49.357937 | H | 60.692230 | -41.522101 | 49.216158 |
| H | 52.430636 | -39.552664 | 49.976328 | H | 52.553316 | -39.563839 | 49.936237 | H | 52.554454 | -39.576146 | 49.940526 |
| H | 53.792230 | -41.131499 | 51.435119 | H | 53.683262 | -41.136999 | 51.566153 | H | 53.947153 | -41.022687 | 51.484646 |
| H | 54.486022 | -39.739435 | 52.277397 | H | 54.262907 | -39.750570 | 52.500041 | H | 54.392352 | -39.587815 | 52.422665 |
| H | 51.538673 | -48.322447 | 50.207908 | H | 51.598734 | -48.350774 | 50.258571 | H | 51.488621 | -48.287140 | 50.051394 |
| H | 54.950394 | -50.051450 | 44.243021 | H | 54.906779 | -50.121272 | 44.197523 | H | 56.469925 | -48.268034 | 42.908755 |
| H | 58.085565 | -43.760748 | 46.930590 | H | 58.095967 | -43.820524 | 46.907952 | H | 58.128063 | -43.808742 | 46.901129 |
| H | 53.622409 | -42.012931 | 45.812707 | H | 53.636885 | -42.076516 | 45.847840 | H | 53.684858 | -42.041055 | 45.817251 |
| H | 52.053314 | -39.325833 | 51.702285 | H | 51.958510 | -39.298447 | 51.594755 | H | 52.006573 | -39.430171 | 51.628720 |
| H | 53.108743 | -38.169169 | 50.856607 | H | 53.137742 | -38.175353 | 50.874904 | H | 52.992370 | -38.144249 | 50.893025 |
| O | 52.513342 | -45.621971 | 46.167901 | O | 52.531595 | -45.676464 | 46.175351 | O | 52.826958 | -46.049759 | 45.935010 |
| H | 53.079120 | -45.229110 | 46.875851 | H | 53.118548 | -45.298667 | 46.876522 | H | 53.315818 | -45.579878 | 46.654560 |
| H | 51.635141 | -45.757684 | 46.561478 | H | 51.655275 | -45.790905 | 46.580167 | H | 51.934462 | -46.227324 | 46.277072 |
| O | 56.949900 | -47.345562 | 48.266152 | O | 56.979683 | -47.430572 | 48.205563 | O | 56.977726 | -47.430908 | 48.097524 |
| H | 56.922729 | -46.357180 | 48.128493 | H | 56.954843 | -46.441404 | 48.069561 | H | 56.948491 | -46.433615 | 48.039817 |
| H | 57.622471 | -47.485289 | 48.956635 | H | 57.657105 | -47.574004 | 48.891468 | H | 57.653569 | -47.634906 | 48.768484 |
| H | 51.567152 | -47.852483 | 42.056747 | H | 51.550238 | -47.833026 | 42.047059 | H | 52.055589 | -47.775374 | 41.632526 |
| H | 55.411425 | -43.364869 | 52.995635 | H | 55.478678 | -43.644061 | 53.075757 | H | 55.350935 | -43.533344 | 52.858493 |
| H | 54.920302 | -45.003930 | 52.512069 | H | 54.977582 | -45.260097 | 52.531412 | H | 54.965131 | -45.149410 | 52.233294 |

|   |           |            |           |   |           |            |           |   |           |            |           |
|---|-----------|------------|-----------|---|-----------|------------|-----------|---|-----------|------------|-----------|
| H | 51.105659 | -43.172429 | 47.239245 | H | 51.110790 | -43.297035 | 47.379205 | H | 50.925658 | -42.743535 | 47.096030 |
| H | 50.276138 | -41.801342 | 48.005479 | H | 50.301314 | -41.914425 | 48.150053 | H | 50.346302 | -41.411986 | 48.099931 |

**Table S7.** Cartesian coordinates (Å) of the siroheme species (Fe<sup>2+</sup> & Fe<sup>3+</sup>) without ligands (and without the cubane cluster) optimized at DFT (BP86 functional) using TZ2P basis sets. S is the spin state of the species.

| Siroheme (Fe <sup>2+</sup> ) without HSO <sub>3</sub> <sup>-</sup> |           |           |           |     |           |           |           |     |           |           |           |
|--------------------------------------------------------------------|-----------|-----------|-----------|-----|-----------|-----------|-----------|-----|-----------|-----------|-----------|
| S=0                                                                |           |           |           | S=1 |           |           |           | S=2 |           |           |           |
| C                                                                  | 50.428910 | 4.480310  | 71.588390 | C   | 50.428910 | 4.480310  | 71.588390 | C   | 50.428910 | 4.480310  | 71.588390 |
| C                                                                  | 51.181491 | 5.624492  | 70.909137 | C   | 51.534437 | 5.428793  | 71.129468 | C   | 51.610530 | 5.332681  | 71.122971 |
| C                                                                  | 50.440593 | 6.115249  | 69.660182 | C   | 51.054217 | 6.301569  | 69.966918 | C   | 51.136957 | 6.514936  | 70.270837 |
| N                                                                  | 51.208828 | 7.072052  | 68.860254 | N   | 52.093792 | 7.150449  | 69.387841 | N   | 52.223723 | 7.270762  | 69.642840 |
| C                                                                  | 52.246991 | 6.746760  | 68.090505 | C   | 52.993590 | 6.746167  | 68.490213 | C   | 52.849522 | 6.894666  | 68.529094 |
| N                                                                  | 52.528980 | 5.451683  | 67.863668 | N   | 53.007575 | 5.467511  | 68.086874 | N   | 52.477887 | 5.758867  | 67.891061 |
| N                                                                  | 53.009716 | 7.688450  | 67.520599 | N   | 53.871231 | 7.623566  | 67.983052 | N   | 53.821941 | 7.653088  | 68.010620 |
| C                                                                  | 52.322910 | 2.353310  | 63.305390 | C   | 52.322910 | 2.353310  | 63.305390 | C   | 52.322910 | 2.353310  | 63.305390 |
| C                                                                  | 53.591862 | 2.984461  | 63.874089 | C   | 53.601662 | 2.974218  | 63.866024 | C   | 53.485053 | 3.152182  | 63.895914 |
| C                                                                  | 53.355115 | 3.575725  | 65.264038 | C   | 53.312894 | 3.863007  | 65.074637 | C   | 53.019161 | 4.110582  | 64.990852 |
| N                                                                  | 54.570164 | 4.160079  | 65.854775 | N   | 54.545160 | 4.340827  | 65.735726 | N   | 54.132610 | 4.735869  | 65.743807 |
| C                                                                  | 55.054943 | 5.369094  | 65.492051 | C   | 55.247909 | 5.435643  | 65.301044 | C   | 54.879654 | 5.796483  | 65.187392 |
| N                                                                  | 54.270161 | 6.359423  | 65.060719 | N   | 54.550953 | 6.559486  | 65.016841 | N   | 54.179382 | 6.952101  | 64.986184 |
| N                                                                  | 56.355043 | 5.646332  | 65.652370 | N   | 56.558414 | 5.430116  | 65.247415 | N   | 56.158584 | 5.748602  | 64.992620 |
| C                                                                  | 57.721910 | 3.753310  | 61.692390 | C   | 57.721910 | 3.753310  | 61.692390 | C   | 57.721910 | 3.753310  | 61.692390 |
| C                                                                  | 57.681910 | 4.934310  | 60.688390 | C   | 57.681910 | 4.934310  | 60.688390 | C   | 57.681910 | 4.934310  | 60.688390 |
| C                                                                  | 57.442737 | 6.296033  | 61.341411 | C   | 57.762717 | 6.304544  | 61.371910 | C   | 57.683876 | 6.305223  | 61.382037 |
| C                                                                  | 58.596565 | 6.787800  | 62.204556 | C   | 59.160390 | 6.602589  | 61.900044 | C   | 59.069794 | 6.677475  | 61.891886 |
| N                                                                  | 58.219822 | 8.088913  | 62.833764 | N   | 59.163622 | 7.871339  | 62.684279 | N   | 59.031624 | 7.960387  | 62.662313 |
| C                                                                  | 51.935910 | 3.947310  | 59.008390 | C   | 51.935910 | 3.947310  | 59.008390 | C   | 51.935910 | 3.947310  | 59.008390 |
| C                                                                  | 52.628910 | 4.440310  | 60.285390 | C   | 52.628910 | 4.440310  | 60.285390 | C   | 52.628910 | 4.440310  | 60.285390 |
| C                                                                  | 52.688189 | 5.962325  | 60.465300 | C   | 51.942044 | 5.639653  | 60.944060 | C   | 51.772764 | 5.475893  | 61.022423 |
| C                                                                  | 53.875337 | 6.298266  | 61.359298 | C   | 52.929933 | 6.399714  | 61.815287 | C   | 52.601376 | 6.359548  | 61.937695 |
| N                                                                  | 53.797801 | 7.634224  | 62.001635 | N   | 52.245017 | 7.442492  | 62.633510 | N   | 51.721978 | 7.265952  | 62.735501 |
| Fe                                                                 | 54.351170 | 10.698689 | 64.780632 | Fe  | 53.901461 | 10.445826 | 64.898278 | Fe  | 53.555941 | 10.512934 | 65.147684 |
| C                                                                  | 57.618677 | 10.601724 | 65.740152 | C   | 57.288628 | 10.360067 | 64.836887 | C   | 56.990300 | 10.460878 | 65.437068 |
| C                                                                  | 53.436536 | 11.038217 | 67.973488 | C   | 53.948268 | 10.962047 | 68.218195 | C   | 53.280260 | 10.742489 | 68.525300 |
| C                                                                  | 51.150824 | 10.001880 | 63.869467 | C   | 50.544201 | 9.767234  | 65.042462 | C   | 50.166453 | 9.920782  | 64.916581 |
| C                                                                  | 55.296955 | 10.978001 | 61.505271 | C   | 53.786221 | 10.412587 | 61.463163 | C   | 53.846270 | 10.085235 | 61.702292 |
| N                                                                  | 55.301916 | 10.566905 | 66.487843 | N   | 55.320894 | 10.462070 | 66.264857 | N   | 54.934108 | 10.472054 | 66.737875 |
| C                                                                  | 56.667327 | 10.334392 | 66.680465 | C   | 56.688093 | 10.286548 | 66.056998 | C   | 56.307552 | 10.518135 | 66.624865 |
| C                                                                  | 56.913936 | 9.915833  | 68.125831 | C   | 57.413601 | 10.124812 | 67.388245 | C   | 56.964869 | 10.649965 | 68.004656 |
| C                                                                  | 56.525795 | 8.430634  | 68.333867 | C   | 57.301280 | 8.687595  | 67.952941 | C   | 57.419923 | 9.257597  | 68.484974 |
| C                                                                  | 58.326584 | 10.185795 | 68.669982 | C   | 58.863298 | 10.617005 | 67.402586 | C   | 58.112286 | 11.697554 | 68.079192 |
| C                                                                  | 59.363273 | 9.109256  | 68.396220 | C   | 60.038459 | 9.780247  | 66.894222 | C   | 59.486438 | 11.147840 | 67.761389 |
| O                                                                  | 59.417687 | 8.585858  | 67.138098 | O   | 59.894730 | 8.689617  | 66.130217 | O   | 60.300626 | 10.910180 | 68.822586 |
| O                                                                  | 60.138608 | 8.691978  | 69.232885 | O   | 61.172944 | 10.135778 | 67.186034 | O   | 59.895474 | 10.888919 | 66.644665 |
| C                                                                  | 55.831733 | 10.782351 | 68.796649 | C   | 56.492482 | 11.019448 | 68.249212 | C   | 55.767970 | 11.134665 | 68.849539 |
| C                                                                  | 54.774142 | 10.799947 | 67.722686 | C   | 55.162284 | 10.812519 | 67.575332 | C   | 54.574401 | 10.750183 | 68.017747 |
| N                                                                  | 52.651136 | 10.498277 | 65.730175 | N   | 52.533964 | 10.217869 | 66.377890 | N   | 51.996761 | 10.137718 | 66.538355 |
| C                                                                  | 52.437710 | 10.853003 | 67.038070 | C   | 52.719741 | 10.654088 | 67.650542 | C   | 52.086984 | 10.496069 | 67.835175 |
| C                                                                  | 50.961022 | 11.003075 | 67.354282 | C   | 51.395239 | 10.843994 | 68.369217 | C   | 50.716077 | 10.786955 | 68.433813 |
| C                                                                  | 50.575253 | 10.660821 | 68.792809 | C   | 51.429244 | 10.634734 | 69.880952 | C   | 50.515440 | 10.361593 | 69.884619 |
| C                                                                  | 50.573377 | 12.477731 | 67.041280 | C   | 50.942872 | 12.300422 | 68.044734 | C   | 50.546066 | 12.330741 | 68.279604 |
| C                                                                  | 49.068214 | 12.734887 | 67.293559 | C   | 49.542330 | 12.600619 | 68.636052 | C   | 49.146805 | 12.804032 | 68.745904 |
| O                                                                  | 48.763381 | 13.353643 | 68.352056 | O   | 49.506686 | 13.292042 | 69.691989 | O   | 49.080795 | 13.333022 | 69.892285 |
| O                                                                  | 48.265580 | 12.273720 | 66.424826 | O   | 48.552489 | 12.100363 | 68.019057 | O   | 48.185287 | 12.596434 | 67.946335 |
| C                                                                  | 50.371719 | 10.061520 | 66.286613 | C   | 50.523245 | 9.841769  | 67.585169 | C   | 49.804864 | 10.039774 | 67.439494 |
| C                                                                  | 51.409057 | 10.153094 | 65.202078 | C   | 51.195812 | 9.879344  | 66.240795 | C   | 50.658969 | 9.997480  | 66.198343 |
| N                                                                  | 53.432874 | 10.477579 | 63.051679 | N   | 52.467692 | 10.198046 | 63.540422 | N   | 52.256863 | 10.013073 | 63.584481 |
| C                                                                  | 52.095035 | 10.200124 | 62.840327 | C   | 51.120257 | 9.990470  | 63.774809 | C   | 50.882045 | 9.988731  | 63.693316 |

|   |           |           |           |   |           |           |           |   |           |           |           |
|---|-----------|-----------|-----------|---|-----------|-----------|-----------|---|-----------|-----------|-----------|
| C | 51.793974 | 10.172226 | 61.444420 | C | 50.386209 | 10.008187 | 62.546604 | C | 50.291827 | 10.038437 | 62.387546 |
| C | 52.963136 | 10.466206 | 60.773386 | C | 51.293170 | 10.234882 | 61.532288 | C | 51.327123 | 10.096415 | 61.470479 |
| C | 53.974511 | 10.662538 | 61.769451 | C | 52.584168 | 10.333327 | 62.145339 | C | 52.550724 | 10.077673 | 62.217679 |
| N | 56.099554 | 10.806351 | 63.821291 | N | 55.263197 | 10.279186 | 63.432512 | N | 55.139329 | 10.055454 | 63.821342 |
| C | 56.295963 | 11.059362 | 62.458925 | C | 55.039114 | 10.389928 | 62.058332 | C | 55.037682 | 10.109927 | 62.431054 |
| C | 57.677195 | 11.335389 | 62.200607 | C | 56.278720 | 10.567039 | 61.370118 | C | 56.329138 | 10.373248 | 61.867678 |
| C | 58.333664 | 11.248186 | 63.411719 | C | 57.267072 | 10.595319 | 62.332253 | C | 57.203764 | 10.528696 | 62.925605 |
| C | 57.351497 | 10.911981 | 64.393042 | C | 56.619615 | 10.420788 | 63.595976 | C | 56.446768 | 10.333573 | 64.129220 |
| C | 52.934910 | 13.851310 | 62.600390 | C | 52.934910 | 13.851310 | 62.600390 | C | 52.934910 | 13.851310 | 62.600390 |
| C | 52.753513 | 13.483412 | 64.068282 | C | 52.467665 | 13.415443 | 63.985534 | C | 52.271690 | 13.391892 | 63.896397 |
| S | 54.277589 | 12.910067 | 64.904999 | S | 53.829340 | 12.758476 | 65.020770 | S | 53.479388 | 12.795276 | 65.151417 |
| H | 54.835282 | 7.153116  | 64.551765 | H | 55.025287 | 7.370680  | 64.627441 | H | 54.629662 | 7.737067  | 64.512213 |
| H | 50.957426 | 4.146734  | 72.489292 | H | 50.767523 | 3.859938  | 72.426412 | H | 50.772273 | 3.648548  | 72.215220 |
| H | 50.329165 | 3.616703  | 70.916000 | H | 50.119301 | 3.809096  | 70.775711 | H | 49.882728 | 4.058145  | 70.733286 |
| H | 49.418573 | 4.790367  | 71.887816 | H | 49.542508 | 5.036913  | 71.920043 | H | 49.720075 | 5.076282  | 72.179289 |
| H | 51.308778 | 6.469616  | 71.599527 | H | 51.855217 | 6.080339  | 71.953677 | H | 52.173400 | 5.720329  | 71.983732 |
| H | 52.193067 | 5.293012  | 70.631942 | H | 52.423032 | 4.854081  | 70.826884 | H | 52.316791 | 4.713219  | 70.548807 |
| H | 50.144043 | 5.269525  | 69.020345 | H | 50.623819 | 5.682561  | 69.165113 | H | 50.446226 | 6.178822  | 69.483281 |
| H | 49.509166 | 6.620310  | 69.936921 | H | 50.253542 | 6.971700  | 70.300122 | H | 50.574924 | 7.225188  | 70.886763 |
| H | 53.438223 | 5.173140  | 67.506661 | H | 53.718150 | 5.122592  | 67.436953 | H | 53.156100 | 5.367532  | 67.203005 |
| H | 51.983208 | 4.733613  | 68.321394 | H | 52.490962 | 4.772642  | 68.611088 | H | 51.980349 | 5.064633  | 68.440107 |
| H | 53.580609 | 7.432347  | 66.713037 | H | 54.426940 | 7.355434  | 67.177405 | H | 54.122316 | 7.472712  | 67.050208 |
| H | 52.834244 | 8.683587  | 67.672189 | H | 53.718946 | 8.628861  | 68.102520 | H | 53.857789 | 8.638437  | 68.295868 |
| H | 52.508131 | 1.930469  | 62.311573 | H | 52.539815 | 1.725209  | 62.433864 | H | 52.669226 | 1.680376  | 62.512143 |
| H | 51.514713 | 3.091836  | 63.215730 | H | 51.602626 | 3.124003  | 62.997195 | H | 51.556110 | 3.013359  | 62.877219 |
| H | 53.957380 | 3.777020  | 63.203590 | H | 54.119258 | 3.564586  | 63.093756 | H | 54.012409 | 3.714376  | 63.109616 |
| H | 54.393793 | 2.234877  | 63.937239 | H | 54.299629 | 2.180013  | 64.169616 | H | 54.224291 | 2.461356  | 64.329049 |
| H | 53.008129 | 2.800531  | 65.957746 | H | 52.735218 | 3.309682  | 65.825550 | H | 52.402536 | 3.567263  | 65.720104 |
| H | 52.568529 | 4.341256  | 65.240530 | H | 52.706685 | 4.729482  | 64.789733 | H | 52.382624 | 4.905439  | 64.584518 |
| H | 53.297397 | 6.196985  | 64.788588 | H | 53.541475 | 6.630131  | 65.193258 | H | 53.166774 | 7.001694  | 65.151367 |
| H | 57.029318 | 4.936417  | 65.906731 | H | 57.033831 | 4.546572  | 65.404121 | H | 56.535615 | 4.812504  | 65.149996 |
| H | 56.675190 | 6.561087  | 65.336909 | H | 57.163823 | 6.375897  | 65.112769 | H | 57.258261 | 6.936313  | 65.047170 |
| H | 57.828619 | 2.798588  | 61.163611 | H | 57.623650 | 2.793158  | 61.170974 | H | 57.695601 | 2.791042  | 61.165825 |
| H | 56.792640 | 3.714863  | 62.279361 | H | 56.896198 | 3.836849  | 62.413372 | H | 56.856471 | 3.798728  | 62.368118 |
| H | 58.562162 | 3.841026  | 62.393306 | H | 58.662647 | 3.729448  | 62.257942 | H | 58.631545 | 3.770938  | 62.307607 |
| H | 58.616638 | 4.958685  | 60.108321 | H | 58.499715 | 4.834242  | 59.959282 | H | 58.530792 | 4.868118  | 59.991872 |
| H | 56.877310 | 4.754095  | 59.961307 | H | 56.746768 | 4.882071  | 60.113765 | H | 56.772460 | 4.850808  | 60.078070 |
| H | 56.550098 | 6.239511  | 61.979389 | H | 57.042539 | 6.343555  | 62.204582 | H | 56.970578 | 6.294354  | 62.221796 |
| H | 57.236172 | 7.048798  | 60.565137 | H | 57.476296 | 7.097798  | 60.664945 | H | 57.346774 | 7.083628  | 60.681356 |
| H | 59.516543 | 6.920741  | 61.623575 | H | 59.876507 | 6.691102  | 61.074996 | H | 59.768575 | 6.801663  | 61.057400 |
| H | 58.807471 | 6.090360  | 63.022974 | H | 59.513919 | 5.816318  | 62.576787 | H | 59.474457 | 5.917394  | 62.569498 |
| H | 58.890649 | 8.379006  | 63.550350 | H | 60.116824 | 8.173179  | 62.905221 | H | 59.969588 | 8.353334  | 62.780877 |
| H | 57.184266 | 8.012116  | 63.283655 | H | 58.598002 | 7.732509  | 63.660928 | H | 58.604646 | 7.817740  | 63.655576 |
| H | 51.921589 | 2.851010  | 58.971413 | H | 52.460538 | 3.079644  | 58.589366 | H | 52.544496 | 3.195746  | 58.490237 |
| H | 52.460339 | 4.311042  | 58.114519 | H | 51.918873 | 4.736935  | 58.245095 | H | 51.762967 | 4.781417  | 58.315538 |
| H | 50.896829 | 4.300346  | 58.953612 | H | 50.896936 | 3.649244  | 59.207568 | H | 50.962409 | 3.491793  | 59.237276 |
| H | 53.659505 | 4.047691  | 60.284538 | H | 53.663266 | 4.722852  | 60.030436 | H | 53.594456 | 4.896008  | 60.015585 |
| H | 52.143475 | 4.002432  | 61.167521 | H | 52.709749 | 3.621111  | 61.011342 | H | 52.856879 | 3.598121  | 60.951159 |
| H | 51.752665 | 6.331788  | 60.910619 | H | 51.080362 | 5.307769  | 61.543914 | H | 50.980237 | 4.972744  | 61.597961 |
| H | 52.802519 | 6.469953  | 59.496897 | H | 51.552030 | 6.324030  | 60.175672 | H | 51.266624 | 6.121997  | 60.288139 |
| H | 54.806117 | 6.248807  | 60.787056 | H | 53.683160 | 6.907463  | 61.202317 | H | 53.280846 | 7.001293  | 61.365667 |
| H | 53.952237 | 5.573031  | 62.180528 | H | 53.454791 | 5.736890  | 62.514766 | H | 53.202396 | 5.782524  | 62.648349 |
| H | 53.692284 | 8.410474  | 61.324863 | H | 51.543060 | 7.977916  | 62.086841 | H | 51.018124 | 7.736211  | 62.142440 |
| H | 54.663110 | 7.828370  | 62.626814 | H | 52.884949 | 8.179472  | 62.984083 | H | 52.241803 | 8.063959  | 63.165117 |
| H | 58.664204 | 10.678651 | 66.039515 | H | 58.375707 | 10.364306 | 64.796026 | H | 58.067762 | 10.622285 | 65.489293 |
| H | 53.149900 | 11.310112 | 68.987199 | H | 53.960973 | 11.315471 | 69.246894 | H | 53.179265 | 11.049330 | 69.565810 |
| H | 50.120830 | 9.808029  | 63.571188 | H | 49.472630 | 9.576409  | 65.070500 | H | 49.081927 | 9.865478  | 64.824849 |
| H | 55.573280 | 11.153731 | 60.465982 | H | 53.743854 | 10.514460 | 60.379280 | H | 53.939639 | 10.150699 | 60.617994 |

|   |           |           |           |   |           |           |           |   |           |           |           |
|---|-----------|-----------|-----------|---|-----------|-----------|-----------|---|-----------|-----------|-----------|
| H | 57.125371 | 7.753797  | 67.715025 | H | 57.695958 | 7.926698  | 67.274330 | H | 58.192683 | 8.840670  | 67.827276 |
| H | 55.469546 | 8.275212  | 68.087923 | H | 56.254491 | 8.443089  | 68.166413 | H | 56.570248 | 8.562635  | 68.486514 |
| H | 56.672712 | 8.153113  | 69.386292 | H | 57.852371 | 8.630006  | 68.901132 | H | 57.818647 | 9.308005  | 69.507333 |
| H | 58.710438 | 11.139447 | 68.276069 | H | 58.934555 | 11.577258 | 66.869010 | H | 57.902481 | 12.512642 | 67.376362 |
| H | 58.284977 | 10.286562 | 69.760287 | H | 59.137080 | 10.842876 | 68.442219 | H | 58.116412 | 12.126460 | 69.089451 |
| H | 51.098735 | 9.764249  | 69.156535 | H | 52.016578 | 9.753025  | 70.176764 | H | 50.611227 | 9.273927  | 69.989551 |
| H | 49.493952 | 10.503331 | 68.875818 | H | 50.413874 | 10.525182 | 70.276645 | H | 49.511411 | 10.644513 | 70.222587 |
| H | 50.840634 | 11.472119 | 69.481241 | H | 51.885065 | 11.492900 | 70.389374 | H | 51.229619 | 10.852386 | 70.558124 |
| H | 50.809918 | 12.688829 | 65.990706 | H | 50.921176 | 12.429157 | 66.953896 | H | 50.698875 | 12.596751 | 67.223721 |
| H | 51.179320 | 13.136727 | 67.675178 | H | 51.683119 | 12.993160 | 68.463059 | H | 51.321520 | 12.826059 | 68.877232 |
| H | 50.308240 | 9.029335  | 66.674769 | H | 50.591459 | 8.835812  | 68.031601 | H | 49.599799 | 9.019410  | 67.805862 |
| H | 50.810629 | 9.976476  | 61.027031 | H | 49.310231 | 9.881598  | 62.469188 | H | 49.224560 | 10.052974 | 62.186112 |
| H | 53.121493 | 10.563199 | 59.703389 | H | 51.106027 | 10.319809 | 60.466195 | H | 51.254733 | 10.151461 | 60.388103 |
| H | 58.089981 | 11.577110 | 61.225465 | H | 56.380061 | 10.693742 | 60.296320 | H | 56.533583 | 10.492189 | 60.807299 |
| H | 59.390669 | 11.396302 | 63.615671 | H | 58.327876 | 10.794376 | 62.198235 | H | 58.248757 | 10.826954 | 62.892066 |
| H | 53.248213 | 12.981036 | 62.014765 | H | 53.379300 | 13.005202 | 62.061840 | H | 53.480696 | 13.018598 | 62.136013 |
| H | 51.985169 | 12.709287 | 64.185778 | H | 51.696145 | 12.639350 | 63.906732 | H | 51.558872 | 12.581517 | 63.699209 |
| H | 52.417385 | 14.355205 | 64.648811 | H | 52.028344 | 14.262806 | 64.529397 | H | 51.714006 | 14.217581 | 64.358115 |
| H | 50.973030 | 8.058610  | 68.934835 | H | 52.146601 | 8.117835  | 69.696986 | H | 52.515560 | 8.147317  | 70.065468 |
| H | 55.271508 | 3.483630  | 66.148331 | H | 55.158439 | 3.574373  | 66.011007 | H | 54.773911 | 4.013733  | 66.075162 |
| H | 58.182541 | 8.863201  | 62.155091 | H | 58.704282 | 8.633451  | 62.165649 | H | 58.449995 | 8.672160  | 62.194503 |
| H | 52.962118 | 7.652222  | 62.618268 | H | 51.777061 | 7.055387  | 63.480252 | H | 51.238244 | 6.789141  | 63.513523 |
| H | 51.990846 | 14.230364 | 62.179548 | H | 52.091650 | 14.236014 | 62.006617 | H | 52.180758 | 14.212147 | 61.885034 |
| H | 53.699360 | 14.631320 | 62.485730 | H | 53.692968 | 14.642879 | 62.673525 | H | 53.649080 | 14.664266 | 62.788701 |
| O | 51.731534 | 7.076108  | 63.976517 | O | 51.675429 | 6.946751  | 65.315118 | O | 51.290810 | 7.024786  | 65.472736 |
| H | 51.483160 | 8.015143  | 64.190165 | H | 51.347562 | 7.875544  | 65.481413 | H | 50.912524 | 7.930041  | 65.604241 |
| H | 50.903316 | 6.670416  | 63.665867 | H | 51.004137 | 6.365937  | 65.712942 | H | 51.251330 | 6.576815  | 66.343546 |
| O | 55.812403 | 7.955476  | 63.770030 | O | 57.901727 | 7.562181  | 64.912076 | O | 58.033524 | 7.610037  | 65.093756 |
| H | 55.745969 | 8.924706  | 63.959546 | H | 57.286075 | 8.324452  | 64.893571 | H | 57.633594 | 8.466087  | 65.365355 |
| H | 58.750316 | 9.024253  | 66.558871 | H | 58.977949 | 8.359293  | 65.811653 | H | 59.866624 | 11.187143 | 69.652015 |
| H | 51.963644 | 1.542046  | 63.952760 | H | 51.832304 | 1.722969  | 64.058921 | H | 51.838585 | 1.741032  | 64.077758 |
| H | 55.476416 | 10.377675 | 69.751729 | H | 56.489352 | 10.753217 | 69.312365 | H | 55.751361 | 10.704237 | 69.858328 |
| H | 56.204460 | 11.805981 | 68.966422 | H | 56.783183 | 12.078520 | 68.154987 | H | 55.779937 | 12.230417 | 68.957469 |
| H | 49.375377 | 10.383894 | 65.964091 | H | 49.474863 | 10.156362 | 67.549380 | H | 48.852876 | 10.560970 | 67.289516 |

Siroheme (Fe<sup>3+</sup>) without HSO<sub>3</sub><sup>-</sup>

| S=1/2 |           |          | S=3/2     |   |           | S=5/2    |           |   |           |          |           |
|-------|-----------|----------|-----------|---|-----------|----------|-----------|---|-----------|----------|-----------|
| C     | 50.428910 | 4.480310 | 71.588390 | C | 50.428910 | 4.480310 | 71.588390 | C | 50.428910 | 4.480310 | 71.588390 |
| C     | 51.603290 | 5.365149 | 71.156941 | C | 51.571861 | 5.474672 | 71.367139 | C | 51.438572 | 5.424297 | 70.939070 |
| C     | 51.116855 | 6.586219 | 70.366865 | C | 51.547797 | 6.047026 | 69.945752 | C | 51.266832 | 5.485690 | 69.418678 |
| N     | 52.187994 | 7.444068 | 69.839526 | N | 52.555557 | 7.084224 | 69.700086 | N | 52.328453 | 6.266678 | 68.752525 |
| C     | 52.814625 | 7.236363 | 68.680666 | C | 53.799288 | 6.874964 | 69.264689 | C | 53.609901 | 5.833520 | 68.711140 |
| N     | 52.581011 | 6.107337 | 67.989094 | N | 54.274052 | 5.631889 | 69.124857 | N | 53.895736 | 4.541202 | 68.858899 |
| N     | 53.653776 | 8.158719 | 68.178867 | N | 54.568614 | 7.909876 | 68.884928 | N | 54.577681 | 6.708408 | 68.430886 |
| C     | 52.322910 | 2.353310 | 63.305390 | C | 52.322910 | 2.353310 | 63.305390 | C | 52.322910 | 2.353310 | 63.305390 |
| C     | 53.755600 | 2.783649 | 63.611471 | C | 53.560607 | 2.896215 | 64.015810 | C | 53.735932 | 2.838932 | 63.659261 |
| C     | 54.005325 | 2.813738 | 65.124653 | C | 53.233041 | 3.430879 | 65.412839 | C | 53.798431 | 3.642864 | 64.965955 |
| N     | 55.244658 | 3.493529 | 65.502237 | N | 54.425734 | 3.909661 | 66.112949 | N | 55.167923 | 4.046237 | 65.309755 |
| C     | 55.349737 | 4.813276 | 65.643429 | C | 54.903417 | 5.159250 | 66.053141 | C | 55.767176 | 5.213851 | 65.000409 |
| N     | 54.255701 | 5.604162 | 65.451419 | N | 54.154523 | 6.192256 | 65.665514 | N | 55.031026 | 6.308031 | 64.735800 |
| N     | 56.481055 | 5.402082 | 66.020010 | N | 56.171538 | 5.407102 | 66.455668 | N | 57.096037 | 5.291413 | 64.973558 |
| C     | 57.721910 | 3.753310 | 61.692390 | C | 57.721910 | 3.753310 | 61.692390 | C | 57.721910 | 3.753310 | 61.692390 |
| C     | 57.681910 | 4.934310 | 60.688390 | C | 57.681910 | 4.934310 | 60.688390 | C | 57.681910 | 4.934310 | 60.688390 |
| C     | 56.696497 | 6.043220 | 61.088819 | C | 56.767356 | 6.081911 | 61.137105 | C | 58.117783 | 6.270985 | 61.290763 |
| C     | 56.863387 | 6.524167 | 62.531255 | C | 57.062681 | 6.581415 | 62.552666 | C | 59.580108 | 6.281313 | 61.726288 |
| N     | 56.040324 | 7.705502 | 62.878598 | N | 56.330267 | 7.807870 | 62.930687 | N | 59.909827 | 7.557587 | 62.402894 |
| C     | 51.935910 | 3.947310 | 59.008390 | C | 51.935910 | 3.947310 | 59.008390 | C | 51.935910 | 3.947310 | 59.008390 |
| C     | 52.628910 | 4.440310 | 60.285390 | C | 52.628910 | 4.440310 | 60.285390 | C | 52.628910 | 4.440310 | 60.285390 |
| C     | 51.865009 | 5.650112 | 60.831973 | C | 51.699143 | 5.426648 | 60.998562 | C | 51.646503 | 5.306518 | 61.083105 |

|    |           |           |           |    |           |           |           |    |           |           |           |
|----|-----------|-----------|-----------|----|-----------|-----------|-----------|----|-----------|-----------|-----------|
| C  | 52.287076 | 6.073036  | 62.224297 | C  | 52.209952 | 5.963261  | 62.322773 | C  | 52.224246 | 5.899521  | 62.354051 |
| N  | 51.437013 | 7.198577  | 62.718549 | N  | 51.138377 | 6.789607  | 62.977980 | N  | 51.132290 | 6.488240  | 63.200167 |
| Fe | 54.630107 | 10.970227 | 64.865941 | Fe | 54.312766 | 10.898170 | 65.107092 | Fe | 53.451757 | 10.175449 | 64.735034 |
| C  | 58.009370 | 10.765338 | 65.408685 | C  | 57.732948 | 11.175272 | 64.952934 | C  | 56.880462 | 10.203279 | 64.645900 |
| C  | 54.158234 | 11.568776 | 68.138760 | C  | 54.436693 | 11.447392 | 68.433834 | C  | 53.611268 | 9.817544  | 68.184199 |
| C  | 51.285252 | 10.428562 | 64.441822 | C  | 51.061684 | 9.836705  | 65.408339 | C  | 50.046485 | 9.616846  | 64.922733 |
| C  | 55.149938 | 10.682401 | 61.499890 | C  | 54.173532 | 10.495934 | 61.712700 | C  | 53.385522 | 9.483251  | 61.341386 |
| N  | 55.828851 | 10.966534 | 66.468314 | N  | 55.826721 | 11.077689 | 66.457318 | N  | 55.005111 | 9.811173  | 66.160712 |
| C  | 57.208746 | 10.745547 | 66.507154 | C  | 57.195232 | 11.126587 | 66.200848 | C  | 56.357920 | 9.953443  | 65.886100 |
| C  | 57.664557 | 10.573274 | 67.952440 | C  | 57.962708 | 11.178984 | 67.519331 | C  | 57.175239 | 9.776799  | 67.170080 |
| C  | 57.379422 | 9.126967  | 68.429163 | C  | 58.094130 | 9.753862  | 68.111498 | C  | 57.463779 | 8.275821  | 67.414675 |
| C  | 59.116426 | 10.987348 | 68.254941 | C  | 59.316955 | 11.909489 | 67.481323 | C  | 58.433105 | 10.642513 | 67.293430 |
| C  | 60.186859 | 9.915121  | 68.135552 | C  | 60.565947 | 11.099308 | 67.170670 | C  | 59.764952 | 10.343377 | 66.603693 |
| O  | 60.173293 | 9.107958  | 67.037417 | O  | 60.508034 | 10.159925 | 66.185223 | O  | 59.930154 | 9.362465  | 65.700933 |
| O  | 61.057547 | 9.751518  | 68.964318 | O  | 61.619026 | 11.267476 | 67.748579 | O  | 60.729086 | 11.034900 | 66.886538 |
| C  | 56.641859 | 11.501823 | 68.630515 | C  | 56.921555 | 11.937192 | 68.363789 | C  | 56.114838 | 10.211244 | 68.202241 |
| C  | 55.453276 | 11.346718 | 67.724906 | C  | 55.634128 | 11.465607 | 67.749495 | C  | 54.820955 | 9.892650  | 67.501513 |
| N  | 53.037752 | 10.913603 | 66.074343 | N  | 53.045362 | 10.525693 | 66.652708 | N  | 52.055037 | 9.576163  | 66.317315 |
| C  | 53.031113 | 11.329437 | 67.375164 | C  | 53.243789 | 10.962830 | 67.926600 | C  | 52.331720 | 9.762630  | 67.634735 |
| C  | 51.630037 | 11.569931 | 67.903584 | C  | 51.959373 | 10.964835 | 68.732339 | C  | 51.087452 | 10.118389 | 68.432295 |
| C  | 51.401484 | 11.141805 | 69.351432 | C  | 52.116881 | 10.637710 | 70.216055 | C  | 50.979473 | 9.466277  | 69.808535 |
| C  | 51.373065 | 13.096123 | 67.725681 | C  | 51.363700 | 12.393410 | 68.549726 | C  | 51.148865 | 11.673457 | 68.552322 |
| C  | 49.899836 | 13.456856 | 68.053757 | C  | 49.965630 | 12.498796 | 69.226168 | C  | 49.869495 | 12.237687 | 69.221401 |
| O  | 49.677324 | 13.940253 | 69.196213 | O  | 49.923391 | 13.095897 | 70.333179 | O  | 49.958986 | 12.547247 | 70.439905 |
| O  | 49.051584 | 13.200900 | 67.147163 | O  | 49.007882 | 11.946559 | 68.606279 | O  | 48.837761 | 12.313508 | 68.491402 |
| C  | 50.801359 | 10.756730 | 66.897998 | C  | 51.126464 | 9.950782  | 67.931529 | C  | 49.971363 | 9.695535  | 67.459938 |
| C  | 51.715746 | 10.673896 | 65.713247 | C  | 51.741172 | 10.062827 | 66.569881 | C  | 50.672144 | 9.638419  | 66.135422 |
| N  | 53.474133 | 10.540009 | 63.310749 | N  | 52.924708 | 10.236617 | 63.828509 | N  | 52.009931 | 9.556132  | 63.403575 |
| C  | 52.107669 | 10.385987 | 63.302088 | C  | 51.603097 | 9.979525  | 64.113423 | C  | 50.653445 | 9.539843  | 63.647806 |
| C  | 51.624716 | 10.190771 | 61.967695 | C  | 50.847864 | 9.843019  | 62.908633 | C  | 49.941592 | 9.373621  | 62.416675 |
| C  | 52.723988 | 10.249513 | 61.135129 | C  | 51.736901 | 10.001160 | 61.859307 | C  | 50.886758 | 9.290789  | 61.409670 |
| C  | 53.860392 | 10.481147 | 61.965347 | C  | 53.015789 | 10.244434 | 62.434053 | C  | 52.170359 | 9.423361  | 62.022740 |
| N  | 56.239238 | 10.798022 | 63.700560 | N  | 55.664432 | 10.843904 | 63.640550 | N  | 54.875483 | 9.824102  | 63.267470 |
| C  | 56.258408 | 10.855657 | 62.301725 | C  | 55.403305 | 10.777761 | 62.269051 | C  | 54.635976 | 9.703895  | 61.901040 |
| C  | 57.608080 | 10.963496 | 61.832273 | C  | 56.614344 | 10.978913 | 61.530805 | C  | 55.860918 | 9.908786  | 61.182522 |
| C  | 58.416523 | 10.957127 | 62.940561 | C  | 57.617128 | 11.155541 | 62.451960 | C  | 56.833903 | 10.182679 | 62.115908 |
| C  | 57.554777 | 10.857044 | 64.080116 | C  | 57.010405 | 11.073748 | 63.747653 | C  | 56.204221 | 10.116385 | 63.404739 |
| C  | 52.934910 | 13.851310 | 62.600390 | C  | 52.934910 | 13.851310 | 62.600390 | C  | 52.934910 | 13.851310 | 62.600390 |
| C  | 52.997641 | 13.672953 | 64.115534 | C  | 52.499573 | 13.510246 | 64.022940 | C  | 52.192867 | 13.052663 | 63.667998 |
| S  | 54.618574 | 13.076089 | 64.710350 | S  | 53.932968 | 13.161245 | 65.112330 | S  | 53.330661 | 12.396590 | 64.961890 |
| H  | 54.448174 | 6.614927  | 65.379054 | H  | 54.645634 | 7.106873  | 65.642363 | H  | 55.513322 | 7.168170  | 64.496340 |
| H  | 50.784819 | 3.616480  | 72.161734 | H  | 50.457215 | 4.081729  | 72.609075 | H  | 50.563395 | 4.461861  | 72.676219 |
| H  | 49.872916 | 4.105536  | 70.718242 | H  | 50.495638 | 3.632126  | 70.893085 | H  | 50.548455 | 3.453424  | 71.215898 |
| H  | 49.727389 | 5.038383  | 72.222118 | H  | 49.453442 | 4.962804  | 71.441652 | H  | 49.397243 | 4.796646  | 71.383528 |
| H  | 52.167868 | 5.710047  | 72.034435 | H  | 51.493465 | 6.306816  | 72.080950 | H  | 51.332991 | 6.439737  | 71.346624 |
| H  | 52.309892 | 4.777372  | 70.550288 | H  | 52.540916 | 4.989500  | 71.559591 | H  | 52.461285 | 5.097506  | 71.177700 |
| H  | 50.484073 | 6.275822  | 69.522675 | H  | 51.683510 | 5.255599  | 69.195179 | H  | 51.237977 | 4.482980  | 68.969768 |
| H  | 50.495541 | 7.225456  | 71.004103 | H  | 50.573171 | 6.510502  | 69.747414 | H  | 50.317149 | 5.961370  | 69.148123 |
| H  | 53.146958 | 5.906748  | 67.160753 | H  | 55.183673 | 5.482698  | 68.698449 | H  | 54.856243 | 4.220245  | 68.839513 |
| H  | 52.210818 | 5.303682  | 68.483987 | H  | 53.849543 | 4.858270  | 69.620617 | H  | 53.183984 | 3.876006  | 69.132648 |
| H  | 54.061679 | 8.026202  | 67.255569 | H  | 55.575763 | 7.801153  | 68.886826 | H  | 55.548891 | 6.440853  | 68.533535 |
| H  | 53.632566 | 9.118741  | 68.519163 | H  | 54.217574 | 8.864864  | 68.908562 | H  | 54.361033 | 7.709898  | 68.402596 |
| H  | 52.167806 | 2.187928  | 62.234633 | H  | 52.583860 | 1.929728  | 62.329405 | H  | 52.334972 | 1.786590  | 62.367717 |
| H  | 51.593188 | 3.100965  | 63.647048 | H  | 51.563635 | 3.131235  | 63.146049 | H  | 51.618799 | 3.187058  | 63.185245 |
| H  | 53.962536 | 3.776617  | 63.180120 | H  | 54.035076 | 3.696054  | 63.426438 | H  | 54.147882 | 3.456088  | 62.846500 |
| H  | 54.475700 | 2.100288  | 63.142590 | H  | 54.312217 | 2.100268  | 64.113408 | H  | 54.407344 | 1.973432  | 63.753883 |
| H  | 54.063360 | 1.794633  | 65.520292 | H  | 52.782342 | 2.643417  | 66.029026 | H  | 53.411173 | 3.046391  | 65.801867 |
| H  | 53.169605 | 3.298993  | 65.649127 | H  | 52.496501 | 4.242607  | 65.365959 | H  | 53.171670 | 4.540430  | 64.912794 |



|   |           |           |           |   |           |           |           |   |           |           |           |
|---|-----------|-----------|-----------|---|-----------|-----------|-----------|---|-----------|-----------|-----------|
| H | 59.430319 | 9.335435  | 66.440862 | H | 59.613135 | 10.111140 | 65.790900 | H | 59.149329 | 8.795479  | 65.417461 |
| H | 52.084324 | 1.409515  | 63.814368 | H | 51.852478 | 1.555734  | 63.895951 | H | 51.924740 | 1.696743  | 64.089555 |
| H | 56.433828 | 11.236950 | 69.672731 | H | 56.992603 | 11.734932 | 69.437609 | H | 56.222036 | 9.720237  | 69.176154 |
| H | 56.983447 | 12.549190 | 68.598054 | H | 57.006213 | 13.024971 | 68.207725 | H | 56.147872 | 11.299811 | 68.372369 |
| H | 49.847018 | 11.244554 | 66.664828 | H | 50.058721 | 10.201166 | 67.945423 | H | 49.135937 | 10.406847 | 67.472829 |

**Siroheme (Fe<sup>2+</sup>) without SO<sub>3</sub><sup>2-</sup>**

| S=0 |           |           | S=1       |    |           | S=2       |           |    |           |           |           |
|-----|-----------|-----------|-----------|----|-----------|-----------|-----------|----|-----------|-----------|-----------|
| C   | 51.422358 | 3.380522  | 70.997438 | C  | 51.422358 | 3.380522  | 70.997438 | C  | 51.422358 | 3.380522  | 70.997438 |
| C   | 51.590579 | 4.088882  | 69.650906 | C  | 51.397867 | 4.150071  | 69.677266 | C  | 51.824992 | 4.175627  | 69.758366 |
| C   | 52.726085 | 5.106266  | 69.698224 | C  | 52.609757 | 5.066843  | 69.539141 | C  | 52.977547 | 5.127906  | 70.059930 |
| N   | 52.897838 | 5.768268  | 68.398603 | N  | 52.565349 | 5.782752  | 68.261560 | N  | 53.406805 | 5.803335  | 68.834135 |
| C   | 53.955593 | 6.505319  | 68.080579 | C  | 53.591481 | 6.442506  | 67.727164 | C  | 54.577347 | 6.421642  | 68.679826 |
| N   | 54.923384 | 6.748274  | 68.954399 | N  | 54.748173 | 6.554731  | 68.379038 | N  | 55.417901 | 6.533995  | 69.722798 |
| N   | 54.112924 | 6.976607  | 66.802083 | N  | 53.490008 | 6.944119  | 66.473313 | N  | 54.941267 | 6.913397  | 67.491674 |
| C   | 55.076348 | 1.425184  | 63.280932 | C  | 55.076348 | 1.425184  | 63.280932 | C  | 55.076348 | 1.425184  | 63.280932 |
| C   | 56.252289 | 2.345250  | 63.604464 | C  | 56.266166 | 2.298782  | 63.677717 | C  | 56.381091 | 2.167521  | 63.575585 |
| C   | 56.717252 | 2.199018  | 65.058978 | C  | 56.455163 | 2.345726  | 65.198184 | C  | 56.682370 | 2.227038  | 65.079106 |
| N   | 57.624919 | 3.266006  | 65.492090 | N  | 57.447516 | 3.333476  | 65.636300 | N  | 57.718247 | 3.204796  | 65.433113 |
| C   | 57.214948 | 4.494161  | 65.833003 | C  | 57.231635 | 4.651933  | 65.643136 | C  | 57.509071 | 4.524833  | 65.441257 |
| N   | 55.916743 | 4.798192  | 65.775318 | N  | 56.024191 | 5.153787  | 65.363241 | N  | 56.293080 | 5.021303  | 65.199028 |
| N   | 58.098814 | 5.433163  | 66.208528 | N  | 58.225003 | 5.519976  | 65.913318 | N  | 58.518038 | 5.390241  | 65.662833 |
| C   | 60.333112 | 3.765595  | 62.506421 | C  | 60.333112 | 3.765595  | 62.506421 | C  | 60.333112 | 3.765595  | 62.506421 |
| C   | 60.256756 | 4.891209  | 61.442682 | C  | 60.256756 | 4.891209  | 61.442682 | C  | 60.256756 | 4.891209  | 61.442682 |
| C   | 60.007232 | 6.297148  | 61.987374 | C  | 60.081043 | 6.295594  | 62.020575 | C  | 60.107515 | 6.300340  | 62.010790 |
| C   | 61.171049 | 6.855446  | 62.801908 | C  | 61.269941 | 6.772059  | 62.849375 | C  | 61.349878 | 6.803647  | 62.741038 |
| N   | 61.064195 | 8.330200  | 62.939862 | N  | 61.165106 | 8.226629  | 63.128425 | N  | 61.236723 | 8.263354  | 62.976979 |
| C   | 55.161658 | 2.803979  | 58.893853 | C  | 55.161658 | 2.803979  | 58.893853 | C  | 55.161658 | 2.803979  | 58.893853 |
| C   | 55.522484 | 3.451533  | 60.237172 | C  | 55.522484 | 3.451533  | 60.237172 | C  | 55.522484 | 3.451533  | 60.237172 |
| C   | 55.878926 | 4.938217  | 60.167362 | C  | 56.035426 | 4.886908  | 60.088352 | C  | 55.965425 | 4.912349  | 60.104944 |
| C   | 56.185425 | 5.454577  | 61.565688 | C  | 56.309003 | 5.497548  | 61.450568 | C  | 56.264120 | 5.503897  | 61.471857 |
| N   | 56.414060 | 6.928050  | 61.602140 | N  | 56.747367 | 6.923298  | 61.369543 | N  | 56.594340 | 6.960238  | 61.415229 |
| Fe  | 56.783946 | 10.314906 | 63.513839 | Fe | 57.272019 | 10.570287 | 63.346339 | Fe | 57.094639 | 10.737805 | 63.351761 |
| C   | 60.119866 | 10.930733 | 63.636219 | C  | 60.641560 | 10.949998 | 63.722408 | C  | 60.549142 | 10.974845 | 63.265312 |
| C   | 56.642736 | 10.647527 | 66.863531 | C  | 56.912140 | 10.921552 | 66.674399 | C  | 57.243490 | 10.870484 | 66.759538 |
| C   | 53.515638 | 9.315983  | 63.465410 | C  | 54.031092 | 9.527352  | 63.096092 | C  | 53.860712 | 9.497270  | 63.586570 |
| C   | 56.937131 | 10.103317 | 60.098151 | C  | 57.698530 | 10.208845 | 59.970298 | C  | 57.128165 | 9.957654  | 59.951089 |
| N   | 58.127526 | 10.439205 | 64.939017 | N  | 58.537655 | 10.621255 | 64.887337 | N  | 58.648263 | 10.700275 | 64.757203 |
| C   | 59.519374 | 10.501171 | 64.777146 | C  | 59.929900 | 10.571360 | 64.818910 | C  | 60.012755 | 10.730627 | 64.498590 |
| C   | 60.219225 | 10.156059 | 66.083725 | C  | 60.491897 | 10.180995 | 66.178880 | C  | 60.778905 | 10.514244 | 65.803639 |
| C   | 60.236575 | 8.623595  | 66.297392 | C  | 60.321945 | 8.657277  | 66.409225 | C  | 60.778275 | 9.014066  | 66.201731 |
| C   | 61.618027 | 10.746973 | 66.270275 | C  | 61.930911 | 10.610068 | 66.450180 | C  | 62.198467 | 11.076813 | 65.841941 |
| C   | 62.850880 | 10.114054 | 65.584112 | C  | 63.106827 | 9.872238  | 65.765138 | C  | 63.352766 | 10.329939 | 65.127622 |
| O   | 62.724934 | 9.259001  | 64.620235 | O  | 62.905647 | 9.012361  | 64.818633 | O  | 63.124618 | 9.363668  | 64.296688 |
| O   | 63.957671 | 10.485586 | 66.018895 | O  | 64.241958 | 10.161053 | 66.189703 | O  | 64.500648 | 10.727080 | 65.404336 |
| C   | 59.179024 | 10.757247 | 67.049616 | C  | 59.441422 | 10.897438 | 67.054988 | C  | 59.782524 | 11.224744 | 66.754786 |
| C   | 57.896390 | 10.577153 | 66.275599 | C  | 58.208793 | 10.792356 | 66.188148 | C  | 58.464829 | 10.912416 | 66.080656 |
| N   | 55.334258 | 10.077968 | 64.889302 | N  | 55.731691 | 10.441157 | 64.595215 | N  | 55.777603 | 10.113432 | 64.966238 |
| C   | 55.440985 | 10.467293 | 66.199300 | C  | 55.758516 | 10.789044 | 65.920047 | C  | 55.987678 | 10.569600 | 66.223775 |
| C   | 54.096029 | 10.778943 | 66.826938 | C  | 54.376332 | 10.988406 | 66.511299 | C  | 54.682258 | 10.806788 | 66.966615 |
| C   | 53.950189 | 10.344536 | 68.286566 | C  | 54.193262 | 10.324951 | 67.880731 | C  | 54.699281 | 10.372695 | 68.432908 |
| C   | 53.918606 | 12.324217 | 66.712004 | C  | 54.137942 | 12.522010 | 66.624072 | C  | 54.400907 | 12.335365 | 66.851409 |
| C   | 52.528868 | 12.770264 | 67.225150 | C  | 52.701673 | 12.828108 | 67.112761 | C  | 53.051184 | 12.708405 | 67.514015 |
| O   | 52.483266 | 13.271885 | 68.384304 | O  | 52.565422 | 13.135885 | 68.330573 | O  | 53.108789 | 13.231151 | 68.662806 |
| O   | 51.546949 | 12.563983 | 66.448130 | O  | 51.777052 | 12.706118 | 66.251743 | O  | 52.001821 | 12.426643 | 66.859195 |
| C   | 53.136146 | 10.055709 | 65.861778 | C  | 53.482722 | 10.368693 | 65.418339 | C  | 53.686748 | 10.008817 | 66.092501 |
| C   | 53.988400 | 9.791779  | 64.649862 | C  | 54.423764 | 10.092516 | 64.280564 | C  | 54.420812 | 9.862490  | 64.785674 |
| N   | 55.537237 | 9.736695  | 62.100503 | N  | 56.136146 | 9.858619  | 61.846220 | N  | 55.768878 | 9.846674  | 62.015327 |
| C   | 54.252934 | 9.243151  | 62.269994 | C  | 54.828124 | 9.438305  | 61.928382 | C  | 54.480754 | 9.452062  | 62.300982 |





|   |           |           |           |   |           |           |           |   |           |           |           |
|---|-----------|-----------|-----------|---|-----------|-----------|-----------|---|-----------|-----------|-----------|
| H | 60.943057 | 8.127824  | 65.626899 | H | 61.046675 | 8.078109  | 65.831575 | H | 61.493093 | 8.435090  | 65.612700 |
| H | 59.233608 | 8.201869  | 66.148520 | H | 59.304957 | 8.341700  | 66.146322 | H | 59.776818 | 8.580552  | 66.090212 |
| H | 60.547868 | 8.398409  | 67.326757 | H | 60.491098 | 8.432104  | 67.471397 | H | 61.076395 | 8.923455  | 67.255299 |
| H | 61.607892 | 11.807724 | 65.977701 | H | 62.051440 | 11.677791 | 66.214205 | H | 62.202203 | 12.104741 | 65.448962 |
| H | 61.854534 | 10.742073 | 67.343408 | H | 62.124882 | 10.524170 | 67.528762 | H | 62.516518 | 11.161428 | 66.890542 |
| H | 59.168284 | 10.285574 | 68.040622 | H | 59.315267 | 10.452235 | 68.049822 | H | 59.836545 | 10.879432 | 67.793983 |
| H | 54.169392 | 9.277384  | 68.424438 | H | 54.463704 | 9.260940  | 67.850942 | H | 54.991114 | 9.319851  | 68.527921 |
| H | 52.926072 | 10.530014 | 68.631393 | H | 53.149227 | 10.409160 | 68.204563 | H | 53.701867 | 10.496720 | 68.871535 |
| H | 54.618498 | 10.915148 | 68.943369 | H | 54.811650 | 10.806049 | 68.647906 | H | 55.389765 | 10.985928 | 69.024966 |
| H | 54.045322 | 12.612621 | 65.660782 | H | 54.298143 | 12.977243 | 65.638096 | H | 54.388266 | 12.612918 | 65.788738 |
| H | 54.706720 | 12.808510 | 67.301113 | H | 54.869602 | 12.940528 | 67.325865 | H | 55.217941 | 12.879135 | 67.341303 |
| H | 52.730424 | 8.358366  | 60.893301 | H | 53.358085 | 8.650257  | 60.437989 | H | 52.807903 | 8.651167  | 61.044641 |
| H | 54.603206 | 8.890411  | 58.983744 | H | 55.385379 | 9.106366  | 58.671604 | H | 54.587470 | 8.945553  | 59.011838 |
| H | 59.399320 | 11.138815 | 59.073182 | H | 60.269822 | 11.122898 | 59.111764 | H | 59.663218 | 10.608279 | 58.715155 |
| H | 61.153164 | 11.707718 | 61.080551 | H | 61.906859 | 11.619414 | 61.229001 | H | 61.534784 | 11.281393 | 60.563711 |
| H | 54.926506 | 12.002421 | 60.926212 | H | 54.827891 | 11.919762 | 61.064150 | H | 55.020049 | 11.989905 | 61.028085 |
| H | 54.074559 | 12.048061 | 63.309257 | H | 54.609934 | 12.470437 | 63.521556 | H | 54.282692 | 12.248423 | 63.431192 |
| H | 54.436259 | 13.770171 | 63.405878 | H | 54.953110 | 14.170055 | 63.171621 | H | 54.445152 | 14.002766 | 63.291890 |
| H | 52.116973 | 5.744507  | 67.748528 | H | 51.672239 | 5.825219  | 67.779901 | H | 52.762456 | 5.808367  | 68.049830 |
| H | 58.608208 | 3.047573  | 65.605982 | H | 58.343231 | 2.998324  | 65.974038 | H | 58.623176 | 2.863289  | 65.737255 |
| H | 60.119559 | 8.628045  | 63.213870 | H | 60.225862 | 8.480970  | 63.459001 | H | 60.349279 | 8.496056  | 63.437990 |
| H | 55.606906 | 7.440835  | 61.183574 | H | 56.105537 | 7.496411  | 60.775391 | H | 55.880712 | 7.504542  | 60.879094 |
| H | 53.600327 | 13.176864 | 61.111645 | H | 53.550774 | 13.127273 | 61.354876 | H | 53.564386 | 13.008946 | 61.156408 |
| H | 55.290133 | 13.735936 | 61.028006 | H | 55.136053 | 13.632000 | 60.716667 | H | 55.160037 | 13.754231 | 60.887295 |
| O | 56.697191 | 7.583874  | 64.328015 | O | 56.176018 | 7.590241  | 64.040226 | O | 56.120286 | 7.518288  | 64.107091 |
| H | 57.603616 | 7.806702  | 64.612338 | H | 56.696679 | 8.412478  | 64.242029 | H | 56.408657 | 8.406986  | 64.464648 |
| H | 56.195289 | 8.435183  | 64.510804 | H | 55.297203 | 7.993488  | 63.810780 | H | 55.176842 | 7.740162  | 63.914022 |
| O | 57.211493 | 7.807095  | 67.726073 | O | 57.042534 | 7.912525  | 67.301732 | O | 57.594435 | 7.879639  | 67.163135 |
| H | 57.054591 | 8.732757  | 67.385468 | H | 56.953554 | 8.866846  | 67.032246 | H | 57.521294 | 8.863302  | 67.009555 |
| H | 57.918603 | 7.914894  | 68.388443 | H | 57.621492 | 7.955032  | 68.085164 | H | 58.229820 | 7.803775  | 67.897267 |
| H | 55.327556 | 0.374889  | 63.478309 | H | 55.197586 | 0.398121  | 63.650731 | H | 55.100843 | 0.403726  | 63.683118 |
| H | 52.738427 | 9.129076  | 66.304310 | H | 52.968950 | 9.461446  | 65.767028 | H | 53.488803 | 9.021087  | 66.539302 |
| H | 52.271143 | 10.694133 | 65.633483 | H | 52.684791 | 11.071168 | 65.134828 | H | 52.732322 | 10.541681 | 65.998795 |
| H | 59.365223 | 11.834499 | 67.192539 | H | 59.703166 | 11.960914 | 67.187112 | H | 59.946141 | 12.314891 | 66.742846 |

**Siroheme (Fe<sup>3+</sup>) without SO<sub>3</sub><sup>2-</sup>**

| <b>S=1/2</b> |           |          | <b>S=3/2</b> |   |           | <b>S=5/2</b> |           |   |           |          |           |
|--------------|-----------|----------|--------------|---|-----------|--------------|-----------|---|-----------|----------|-----------|
| C            | 51.422358 | 3.380522 | 70.997438    | C | 51.422358 | 3.380522     | 70.997438 | C | 51.422358 | 3.380522 | 70.997438 |
| C            | 52.009085 | 4.639696 | 70.362767    | C | 52.010841 | 4.613159     | 70.319180 | C | 51.917058 | 3.458665 | 69.553207 |
| C            | 53.524750 | 4.712678 | 70.539259    | C | 53.491843 | 4.786147     | 70.650758 | C | 52.437405 | 4.855298 | 69.214662 |
| N            | 54.041567 | 5.923054 | 69.892108    | N | 54.005586 | 5.987463     | 69.988639 | N | 52.889489 | 4.910837 | 67.821613 |
| C            | 55.233969 | 6.060698 | 69.327493    | C | 55.178531 | 6.121863     | 69.386686 | C | 53.950522 | 5.566992 | 67.361667 |
| N            | 56.186775 | 5.136912 | 69.471301    | N | 56.156500 | 5.225281     | 69.531792 | N | 54.638340 | 6.411646 | 68.128636 |
| N            | 55.475560 | 7.124477 | 68.515723    | N | 55.373773 | 7.163204     | 68.532928 | N | 54.378946 | 5.342816 | 66.086791 |
| C            | 55.076348 | 1.425184 | 63.280932    | C | 55.076348 | 1.425184     | 63.280932 | C | 55.076348 | 1.425184 | 63.280932 |
| C            | 56.042850 | 2.531370 | 63.702059    | C | 55.978965 | 2.589345     | 63.690191 | C | 56.437656 | 2.031207 | 63.634455 |
| C            | 56.310753 | 2.496572 | 65.207631    | C | 56.248529 | 2.591166     | 65.195708 | C | 56.676734 | 2.073783 | 65.147444 |
| N            | 57.300334 | 3.482170 | 65.655168    | N | 57.210780 | 3.615258     | 65.621004 | N | 58.008257 | 2.570546 | 65.501887 |
| C            | 57.035271 | 4.699608 | 66.128102    | C | 56.916539 | 4.821659     | 66.103420 | C | 58.328775 | 3.795407 | 65.928086 |
| N            | 55.819470 | 5.242512 | 66.012424    | N | 55.683333 | 5.334719     | 66.005985 | N | 57.401817 | 4.751939 | 66.080472 |
| N            | 57.994621 | 5.387841 | 66.784191    | N | 57.867858 | 5.541773     | 66.737014 | N | 59.612617 | 4.089953 | 66.174815 |
| C            | 60.333112 | 3.765595 | 62.506421    | C | 60.333112 | 3.765595     | 62.506421 | C | 60.333112 | 3.765595 | 62.506421 |
| C            | 60.256756 | 4.891209 | 61.442682    | C | 60.256756 | 4.891209     | 61.442682 | C | 60.256756 | 4.891209 | 61.442682 |
| C            | 61.362164 | 5.945117 | 61.584415    | C | 60.247692 | 6.314887     | 61.999206 | C | 61.391477 | 5.909671 | 61.566517 |
| C            | 62.763682 | 5.358453 | 61.447361    | C | 61.542751 | 6.743012     | 62.688687 | C | 62.784751 | 5.309853 | 61.409170 |
| N            | 63.801219 | 6.403383 | 61.677609    | N | 61.569553 | 8.226043     | 62.819706 | N | 63.815749 | 6.317121 | 61.794655 |
| C            | 55.161658 | 2.803979 | 58.893853    | C | 55.161658 | 2.803979     | 58.893853 | C | 55.161658 | 2.803979 | 58.893853 |
| C            | 55.522484 | 3.451533 | 60.237172    | C | 55.522484 | 3.451533     | 60.237172 | C | 55.522484 | 3.451533 | 60.237172 |
| C            | 56.042958 | 4.882654 | 60.078863    | C | 56.106934 | 4.856169     | 60.056222 | C | 55.625720 | 4.974450 | 60.246960 |

|    |           |           |           |    |           |           |           |    |           |           |           |
|----|-----------|-----------|-----------|----|-----------|-----------|-----------|----|-----------|-----------|-----------|
| C  | 56.361413 | 5.487322  | 61.432175 | C  | 56.420194 | 5.506221  | 61.390934 | C  | 55.954837 | 5.403162  | 61.666781 |
| N  | 56.913982 | 6.873826  | 61.332028 | N  | 57.025534 | 6.866869  | 61.225897 | N  | 55.823621 | 6.866423  | 61.899132 |
| Fe | 57.106579 | 10.036037 | 62.903727 | Fe | 57.468201 | 10.648801 | 63.220178 | Fe | 56.524974 | 10.060562 | 63.037322 |
| C  | 60.383267 | 9.369065  | 62.232706 | C  | 60.869227 | 11.004924 | 63.168882 | C  | 59.758708 | 8.927172  | 62.403792 |
| C  | 57.875330 | 10.908579 | 66.040633 | C  | 57.489124 | 11.240951 | 66.518015 | C  | 57.303436 | 10.174917 | 66.382599 |
| C  | 53.890190 | 9.344568  | 63.825108 | C  | 54.490344 | 8.983917  | 63.504961 | C  | 53.148534 | 9.759242  | 63.947534 |
| C  | 56.307342 | 9.660786  | 59.615412 | C  | 57.403596 | 10.368808 | 59.843771 | C  | 55.685426 | 9.431279  | 59.771885 |
| N  | 58.807209 | 10.084179 | 63.945966 | N  | 58.919259 | 10.805351 | 64.593547 | N  | 58.217864 | 9.471581  | 64.220258 |
| C  | 60.067396 | 9.653583  | 63.522471 | C  | 60.298919 | 10.755009 | 64.375825 | C  | 59.461723 | 9.099039  | 63.725014 |
| C  | 61.016711 | 9.565526  | 64.714163 | C  | 61.010503 | 10.565302 | 65.704634 | C  | 60.448859 | 8.911063  | 64.882055 |
| C  | 60.832526 | 8.182139  | 65.376795 | C  | 60.909912 | 9.090472  | 66.167015 | C  | 60.366803 | 7.438497  | 65.341485 |
| C  | 62.495949 | 9.872600  | 64.413501 | C  | 62.454970 | 11.058149 | 65.761201 | C  | 61.899711 | 9.368343  | 64.618947 |
| C  | 63.210775 | 8.899895  | 63.466269 | C  | 63.592788 | 10.245602 | 65.096673 | C  | 62.718868 | 8.516309  | 63.642995 |
| O  | 63.333942 | 7.678490  | 63.867808 | O  | 63.342631 | 9.234113  | 64.326365 | O  | 63.132000 | 7.376664  | 64.076946 |
| O  | 63.621251 | 9.318113  | 62.357789 | O  | 64.744978 | 10.630412 | 65.359349 | O  | 62.932942 | 8.954794  | 62.483865 |
| C  | 60.378014 | 10.641199 | 65.621012 | C  | 60.039493 | 11.401918 | 66.575996 | C  | 59.783759 | 9.804672  | 65.950296 |
| C  | 58.935007 | 10.577705 | 65.205377 | C  | 58.725058 | 11.151062 | 65.887071 | C  | 58.342833 | 9.821625  | 65.521662 |
| N  | 56.093456 | 10.038802 | 64.621078 | N  | 56.208620 | 10.220153 | 64.717763 | N  | 55.399314 | 9.832637  | 64.897199 |
| C  | 56.548303 | 10.609316 | 65.781205 | C  | 56.312880 | 10.759101 | 65.967718 | C  | 55.943235 | 10.207292 | 66.088802 |
| C  | 55.416358 | 10.869385 | 66.758585 | C  | 54.998176 | 10.675996 | 66.714564 | C  | 54.888446 | 10.716032 | 67.048983 |
| C  | 55.776928 | 10.733301 | 68.236379 | C  | 55.122130 | 10.540657 | 68.231301 | C  | 55.103779 | 10.319346 | 68.507896 |
| C  | 54.903672 | 12.311320 | 66.472875 | C  | 54.196508 | 11.966371 | 66.371343 | C  | 54.904108 | 12.265475 | 66.874991 |
| C  | 53.714010 | 12.686885 | 67.397246 | C  | 52.807629 | 11.957880 | 67.073584 | C  | 53.783433 | 12.933055 | 67.715885 |
| O  | 53.930015 | 13.581034 | 68.257603 | O  | 52.642689 | 12.790714 | 68.002008 | O  | 54.132143 | 13.443348 | 68.814616 |
| O  | 52.635849 | 12.043919 | 67.215155 | O  | 51.976712 | 11.095421 | 66.655837 | O  | 52.614290 | 12.879202 | 67.232670 |
| C  | 54.387907 | 9.836979  | 66.259428 | C  | 54.364441 | 9.462704  | 65.998763 | C  | 53.610081 | 10.113291 | 66.428523 |
| C  | 54.755153 | 9.695822  | 64.814979 | C  | 55.011795 | 9.519143  | 64.646935 | C  | 54.008696 | 9.882620  | 65.000089 |
| N  | 55.450324 | 9.560573  | 61.927782 | N  | 56.216760 | 9.805766  | 61.933320 | N  | 54.760938 | 9.594724  | 62.067335 |
| C  | 54.197607 | 9.331129  | 62.453939 | C  | 55.026267 | 9.169514  | 62.211235 | C  | 53.482677 | 9.631217  | 62.578793 |
| C  | 53.237501 | 9.142849  | 61.409895 | C  | 54.387088 | 8.768350  | 60.999910 | C  | 52.529065 | 9.561878  | 61.514746 |
| C  | 53.904250 | 9.291010  | 60.218071 | C  | 55.185367 | 9.206690  | 59.957497 | C  | 53.237691 | 9.494345  | 60.335078 |
| C  | 55.276895 | 9.543641  | 61.534814 | C  | 56.321263 | 9.843847  | 60.540046 | C  | 54.626702 | 9.512394  | 60.673420 |
| N  | 58.133655 | 9.633050  | 61.261502 | N  | 58.837170 | 10.734115 | 61.804545 | N  | 57.521781 | 9.252510  | 61.401920 |
| C  | 57.650952 | 9.676593  | 59.947503 | C  | 58.578127 | 10.794266 | 60.431463 | C  | 57.035076 | 9.321412  | 60.090350 |
| C  | 58.734659 | 9.534345  | 59.026023 | C  | 59.754354 | 11.220409 | 59.738418 | C  | 58.121359 | 9.154531  | 59.176343 |
| C  | 59.878033 | 9.374491  | 59.773846 | C  | 60.740932 | 11.386285 | 60.682007 | C  | 59.262709 | 8.981365  | 59.929081 |
| C  | 59.492874 | 9.456104  | 61.149089 | C  | 60.158238 | 11.081371 | 61.952420 | C  | 58.878809 | 9.050636  | 61.306209 |
| C  | 54.634215 | 12.941636 | 61.407585 | C  | 54.634215 | 12.941636 | 61.407585 | C  | 54.634215 | 12.941636 | 61.407585 |
| C  | 55.305075 | 12.714181 | 62.757194 | C  | 55.057210 | 12.836374 | 62.867590 | C  | 55.093336 | 12.891779 | 62.858598 |
| S  | 57.031891 | 12.124365 | 62.622111 | S  | 56.877759 | 12.848952 | 63.073648 | S  | 56.818881 | 12.268847 | 63.014196 |
| H  | 55.561337 | 6.035848  | 66.600472 | H  | 55.409847 | 6.083498  | 66.646935 | H  | 57.615646 | 5.597465  | 66.618848 |
| H  | 50.335009 | 3.349458  | 70.858804 | H  | 50.361833 | 3.267345  | 70.744014 | H  | 51.065322 | 2.369762  | 71.228516 |
| H  | 51.624296 | 3.347219  | 72.076065 | H  | 51.500146 | 3.453905  | 72.090685 | H  | 50.592311 | 4.078873  | 71.171145 |
| H  | 51.845580 | 2.472689  | 70.545898 | H  | 51.942548 | 2.465346  | 70.682364 | H  | 52.225262 | 3.624785  | 71.706649 |
| H  | 51.776951 | 4.666928  | 69.287764 | H  | 51.898697 | 4.540449  | 69.227725 | H  | 52.723681 | 2.729825  | 69.384596 |
| H  | 51.554903 | 5.534539  | 70.814243 | H  | 51.466877 | 5.514465  | 70.639640 | H  | 51.099283 | 3.201981  | 68.862102 |
| H  | 53.793542 | 4.714970  | 71.606069 | H  | 53.644369 | 4.866045  | 71.736342 | H  | 51.657536 | 5.613071  | 69.380931 |
| H  | 53.998105 | 3.839868  | 70.067859 | H  | 54.060402 | 3.919240  | 70.288796 | H  | 53.287880 | 5.095091  | 69.866727 |
| H  | 57.036539 | 5.186967  | 68.915908 | H  | 56.992636 | 5.284871  | 68.957689 | H  | 55.567914 | 6.761718  | 67.856185 |
| H  | 56.079629 | 4.369345  | 70.122306 | H  | 56.098313 | 4.490644  | 70.225119 | H  | 54.314624 | 6.621177  | 69.064807 |
| H  | 56.435734 | 7.486939  | 68.437042 | H  | 56.320932 | 7.562544  | 68.445883 | H  | 54.870223 | 6.115455  | 65.609157 |
| H  | 54.768571 | 7.855419  | 68.517940 | H  | 54.644536 | 7.872371  | 68.532679 | H  | 53.737670 | 4.830245  | 65.488729 |
| H  | 54.912253 | 1.439249  | 62.198134 | H  | 54.900482 | 1.427880  | 62.200168 | H  | 54.962933 | 1.329426  | 62.195932 |
| H  | 54.100191 | 1.543721  | 63.770660 | H  | 54.099964 | 1.484665  | 63.779938 | H  | 54.250061 | 2.045546  | 63.655920 |
| H  | 55.635274 | 3.514650  | 63.425263 | H  | 55.518951 | 3.545270  | 63.400427 | H  | 56.527190 | 3.049159  | 63.228188 |
| H  | 57.000877 | 2.422338  | 63.172237 | H  | 56.942144 | 2.525139  | 63.163256 | H  | 57.240557 | 1.437968  | 63.172253 |
| H  | 56.697868 | 1.512396  | 65.498920 | H  | 56.665976 | 1.625364  | 65.505133 | H  | 56.586804 | 1.065252  | 65.571835 |
| H  | 55.383901 | 2.648925  | 65.779207 | H  | 55.319174 | 2.725989  | 65.766241 | H  | 55.916706 | 2.684108  | 65.653629 |

|   |           |           |           |   |           |           |           |   |           |           |           |
|---|-----------|-----------|-----------|---|-----------|-----------|-----------|---|-----------|-----------|-----------|
| H | 55.073928 | 4.747440  | 65.538976 | H | 54.937876 | 4.793305  | 65.584759 | H | 56.410835 | 4.522761  | 66.020978 |
| H | 58.921078 | 4.976632  | 66.834442 | H | 58.810555 | 5.166068  | 66.757341 | H | 60.330457 | 3.377614  | 66.142587 |
| H | 57.970943 | 6.417095  | 66.810294 | H | 57.810026 | 6.567343  | 66.755316 | H | 59.880128 | 5.009984  | 66.501270 |
| H | 59.450409 | 3.115375  | 62.448608 | H | 60.299728 | 2.780794  | 62.026623 | H | 59.437475 | 3.131868  | 62.467651 |
| H | 60.380906 | 4.192851  | 63.518004 | H | 59.486325 | 3.835103  | 63.205530 | H | 60.403973 | 4.195026  | 63.515356 |
| H | 61.215529 | 3.130929  | 62.362920 | H | 61.259742 | 3.824822  | 63.091442 | H | 61.201575 | 3.114439  | 62.351053 |
| H | 60.280783 | 4.451415  | 60.434734 | H | 61.098982 | 4.789039  | 60.743041 | H | 60.248070 | 4.448615  | 60.435643 |
| H | 59.288400 | 5.403659  | 61.536399 | H | 59.350615 | 4.740343  | 60.835647 | H | 59.307284 | 5.435712  | 61.552352 |
| H | 61.276259 | 6.435803  | 62.565105 | H | 59.417999 | 6.441330  | 62.715051 | H | 61.330459 | 6.384887  | 62.554599 |
| H | 61.218538 | 6.729298  | 60.826493 | H | 60.074116 | 7.012867  | 61.163337 | H | 61.255552 | 6.708646  | 60.824630 |
| H | 62.913444 | 4.915006  | 60.454799 | H | 62.425202 | 6.448270  | 62.110885 | H | 62.970093 | 4.981283  | 60.379731 |
| H | 62.939739 | 4.580302  | 62.197731 | H | 61.636783 | 6.318799  | 63.693574 | H | 62.929424 | 4.451606  | 62.073824 |
| H | 64.744118 | 6.008357  | 61.629741 | H | 61.722220 | 8.663675  | 61.904703 | H | 64.766178 | 5.953658  | 61.694533 |
| H | 63.663264 | 6.925592  | 62.680620 | H | 62.335870 | 8.679979  | 63.539820 | H | 63.634275 | 6.683778  | 62.829882 |
| H | 54.793986 | 1.780414  | 59.037314 | H | 54.746703 | 1.799071  | 59.039463 | H | 55.095071 | 1.714211  | 58.998798 |
| H | 56.036360 | 2.759073  | 58.231139 | H | 56.047500 | 2.713742  | 58.250915 | H | 55.917463 | 3.024239  | 58.127774 |
| H | 54.377736 | 3.376153  | 58.380168 | H | 54.414400 | 3.403990  | 58.357597 | H | 54.193260 | 3.169070  | 58.525794 |
| H | 56.287194 | 2.844875  | 60.744697 | H | 56.252731 | 2.822621  | 60.767035 | H | 56.476383 | 3.028959  | 60.591841 |
| H | 54.638275 | 3.460719  | 60.892327 | H | 54.627856 | 3.509939  | 60.874925 | H | 54.765262 | 3.161602  | 60.980889 |
| H | 55.292602 | 5.502607  | 59.565435 | H | 55.396142 | 5.487688  | 59.502058 | H | 54.667342 | 5.419974  | 59.938337 |
| H | 56.947997 | 4.883009  | 59.451551 | H | 57.024472 | 4.798566  | 59.449819 | H | 56.395214 | 5.330004  | 59.546783 |
| H | 57.111498 | 4.893282  | 61.968315 | H | 57.132487 | 4.913296  | 61.976940 | H | 56.977986 | 5.124515  | 61.946546 |
| H | 55.467566 | 5.559921  | 62.062280 | H | 55.513831 | 5.647583  | 61.991573 | H | 55.266044 | 4.921567  | 62.371563 |
| H | 57.752049 | 6.919641  | 60.739991 | H | 57.896145 | 6.829044  | 60.685340 | H | 56.585825 | 7.444254  | 61.492433 |
| H | 57.166126 | 7.216607  | 62.294500 | H | 57.227403 | 7.268892  | 62.176741 | H | 55.836692 | 7.057435  | 62.932897 |
| H | 61.414832 | 9.129231  | 61.992181 | H | 61.951656 | 11.097153 | 63.115697 | H | 60.799054 | 8.733447  | 62.153506 |
| H | 58.112453 | 11.387258 | 66.989250 | H | 57.460215 | 11.654689 | 67.523364 | H | 57.596953 | 10.530523 | 67.369595 |
| H | 52.860415 | 9.131663  | 64.105455 | H | 53.537224 | 8.463406  | 63.577605 | H | 52.085044 | 9.817641  | 64.173932 |
| H | 56.044818 | 9.652859  | 58.558645 | H | 57.337717 | 10.399029 | 58.757461 | H | 55.425286 | 9.414969  | 58.714172 |
| H | 61.125215 | 7.378279  | 64.696096 | H | 61.575286 | 8.446007  | 65.587351 | H | 60.680006 | 6.754530  | 64.547349 |
| H | 59.787322 | 8.041264  | 65.686598 | H | 59.881928 | 8.715166  | 66.086319 | H | 59.331261 | 7.202638  | 65.628906 |
| H | 61.458969 | 8.107351  | 66.275058 | H | 61.221685 | 9.024088  | 67.218190 | H | 61.018156 | 7.277931  | 66.210705 |
| H | 62.574192 | 10.880833 | 63.990663 | H | 62.516809 | 12.077078 | 65.351680 | H | 61.878239 | 10.400930 | 64.250732 |
| H | 63.034402 | 9.860882  | 65.372903 | H | 62.746215 | 11.149140 | 66.817058 | H | 62.420466 | 9.357941  | 65.587117 |
| H | 60.531565 | 10.461658 | 66.691513 | H | 60.035109 | 11.122562 | 67.635615 | H | 59.929803 | 9.447258  | 66.976407 |
| H | 56.269603 | 9.778708  | 68.455686 | H | 55.849908 | 9.775076  | 68.524628 | H | 55.175414 | 9.228363  | 68.610497 |
| H | 54.866812 | 10.805076 | 68.844662 | H | 54.143737 | 10.292699 | 68.662470 | H | 54.261153 | 10.669643 | 69.115390 |
| H | 56.443659 | 11.540998 | 68.562360 | H | 55.434995 | 11.487032 | 68.688414 | H | 56.010722 | 10.774671 | 68.923870 |
| H | 54.575549 | 12.377477 | 65.427311 | H | 54.046580 | 12.023153 | 65.286510 | H | 54.755290 | 12.507106 | 65.813550 |
| H | 55.729449 | 13.016709 | 66.625300 | H | 54.771458 | 12.841816 | 66.693049 | H | 55.883925 | 12.645947 | 67.188199 |
| H | 52.183241 | 8.941056  | 61.570674 | H | 53.432639 | 8.254897  | 60.942195 | H | 51.451910 | 9.576901  | 61.646796 |
| H | 53.507759 | 9.222021  | 59.209897 | H | 55.008110 | 9.110405  | 58.890935 | H | 52.848505 | 9.445222  | 59.322815 |
| H | 58.629186 | 9.527764  | 57.945676 | H | 59.824170 | 11.351480 | 58.663141 | H | 58.028574 | 9.161342  | 58.094758 |
| H | 60.896792 | 9.236244  | 59.425186 | H | 61.773476 | 11.685252 | 60.531891 | H | 60.277603 | 8.830918  | 59.574537 |
| H | 54.531591 | 12.000268 | 60.855693 | H | 55.003873 | 12.086278 | 60.829789 | H | 54.638291 | 11.946349 | 60.954079 |
| H | 54.741416 | 11.995565 | 63.362754 | H | 54.664973 | 11.916250 | 63.315549 | H | 54.437174 | 12.253657 | 63.463385 |
| H | 55.371841 | 13.649851 | 63.329915 | H | 54.676245 | 13.682761 | 63.452997 | H | 55.098725 | 13.889811 | 63.313263 |
| H | 53.407400 | 6.715798  | 69.834890 | H | 53.359100 | 6.769104  | 69.912952 | H | 52.341338 | 4.384341  | 67.147336 |
| H | 58.271056 | 3.186378  | 65.672071 | H | 58.189662 | 3.346505  | 65.634286 | H | 58.781653 | 1.933286  | 65.338346 |
| H | 63.752530 | 7.160941  | 60.987115 | H | 60.662678 | 8.581391  | 63.142614 | H | 63.731729 | 7.183562  | 61.246222 |
| H | 56.233430 | 7.546056  | 60.936128 | H | 56.374077 | 7.508063  | 60.728997 | H | 54.944953 | 7.244683  | 61.523789 |
| H | 53.631364 | 13.363920 | 61.559800 | H | 53.537451 | 12.957855 | 61.338647 | H | 53.610871 | 13.339533 | 61.359066 |
| H | 55.211539 | 13.641670 | 60.790582 | H | 55.022001 | 13.858979 | 60.947778 | H | 55.284944 | 13.593809 | 60.812124 |
| O | 57.450390 | 7.415877  | 64.003139 | O | 57.302368 | 7.432274  | 63.960672 | O | 56.005328 | 7.194160  | 64.639763 |
| H | 58.327535 | 7.835070  | 64.115823 | H | 57.727056 | 8.296878  | 64.144379 | H | 56.969210 | 7.134689  | 64.775913 |
| H | 56.833801 | 8.081123  | 64.385872 | H | 56.352500 | 7.643332  | 64.105777 | H | 55.796111 | 8.176204  | 64.745981 |
| O | 58.013139 | 8.149300  | 67.532726 | O | 57.843184 | 8.305867  | 67.611279 | O | 57.308472 | 7.304272  | 67.527500 |
| H | 57.916700 | 9.008587  | 67.052716 | H | 57.715567 | 9.218096  | 67.254186 | H | 57.317552 | 8.229308  | 67.173628 |

|   |           |           |           |   |           |           |           |   |           |           |           |
|---|-----------|-----------|-----------|---|-----------|-----------|-----------|---|-----------|-----------|-----------|
| H | 58.773152 | 8.284841  | 68.127112 | H | 58.609142 | 8.382745  | 68.208818 | H | 57.785383 | 7.359358  | 68.376068 |
| H | 55.470625 | 0.435454  | 63.548204 | H | 55.532969 | 0.462213  | 63.545293 | H | 54.968958 | 0.422673  | 63.717246 |
| H | 54.531936 | 8.866812  | 66.762556 | H | 54.645057 | 8.522352  | 66.499209 | H | 53.367231 | 9.150784  | 66.909239 |
| H | 53.361298 | 10.182531 | 66.425040 | H | 53.271453 | 9.545486  | 65.969191 | H | 52.751865 | 10.787238 | 66.534241 |
| H | 60.781314 | 11.637928 | 65.380119 | H | 60.282587 | 12.474717 | 66.503911 | H | 60.174663 | 10.833311 | 65.896483 |

**Siroheme (Fe<sup>2+</sup>) without NO<sub>2</sub><sup>-</sup>**

| S=0 |           |            | S=1       |    |           | S=2        |           |    |           |            |           |
|-----|-----------|------------|-----------|----|-----------|------------|-----------|----|-----------|------------|-----------|
| C   | 50.353397 | -52.121132 | 49.522288 | C  | 50.353397 | -52.121132 | 49.522288 | C  | 50.353397 | -52.121132 | 49.522288 |
| C   | 50.586451 | -50.763991 | 50.185071 | C  | 50.191970 | -50.603022 | 49.582184 | C  | 50.407619 | -50.613648 | 49.740255 |
| C   | 52.073921 | -50.444107 | 50.271897 | C  | 51.445832 | -49.898247 | 49.077958 | C  | 51.524465 | -49.981119 | 48.919636 |
| N   | 52.289015 | -49.124490 | 50.869378 | N  | 51.272764 | -48.444854 | 49.111468 | N  | 51.509014 | -48.528320 | 49.089492 |
| C   | 53.455874 | -48.480718 | 50.857417 | C  | 52.080105 | -47.580581 | 48.495159 | C  | 52.460520 | -47.697467 | 48.679888 |
| N   | 54.526429 | -49.050492 | 50.283610 | N  | 53.152914 | -48.038650 | 47.827935 | N  | 53.480381 | -48.140910 | 47.913405 |
| N   | 53.560990 | -47.260942 | 51.404363 | N  | 51.816802 | -46.270927 | 48.505831 | N  | 52.431022 | -46.401618 | 49.015384 |
| C   | 52.225000 | -47.068010 | 42.455410 | C  | 52.225000 | -47.068010 | 42.455410 | C  | 52.225000 | -47.068010 | 42.455410 |
| C   | 53.703505 | -47.148801 | 42.844276 | C  | 53.688451 | -47.103964 | 42.901048 | C  | 53.676672 | -47.063731 | 42.937345 |
| C   | 53.897909 | -47.787584 | 44.223905 | C  | 53.895619 | -48.100751 | 44.045848 | C  | 53.810728 | -46.884419 | 44.453382 |
| N   | 55.298837 | -48.081479 | 44.531700 | N  | 55.272231 | -48.180604 | 44.541571 | N  | 55.199360 | -47.112786 | 44.858710 |
| C   | 56.148159 | -47.311340 | 45.220892 | C  | 55.804796 | -47.393209 | 45.484610 | C  | 55.986117 | -46.392566 | 45.666401 |
| N   | 55.758047 | -46.208624 | 45.869976 | N  | 55.046690 | -46.400769 | 46.026431 | N  | 55.549174 | -45.239767 | 46.241290 |
| N   | 57.452091 | -47.625192 | 45.249837 | N  | 57.045735 | -47.583737 | 45.922754 | N  | 57.238087 | -46.781518 | 45.887414 |
| C   | 57.646397 | -45.007662 | 42.604348 | C  | 57.646397 | -45.007662 | 42.604348 | C  | 57.646397 | -45.007662 | 42.604348 |
| C   | 57.606397 | -43.479422 | 42.863688 | C  | 57.606397 | -43.479422 | 42.863688 | C  | 57.606397 | -43.479422 | 42.863688 |
| C   | 57.939624 | -43.117970 | 44.316241 | C  | 57.693263 | -43.120937 | 44.349542 | C  | 58.201658 | -43.111471 | 44.230161 |
| C   | 59.416453 | -43.351550 | 44.619426 | C  | 59.026868 | -43.520245 | 44.969282 | C  | 59.716886 | -43.291270 | 44.247626 |
| N   | 59.664557 | -43.345161 | 46.090669 | N  | 58.984822 | -43.342899 | 46.452546 | N  | 60.250257 | -43.186205 | 45.641240 |
| C   | 51.838000 | -42.751710 | 40.914430 | C  | 51.838000 | -42.751710 | 40.914430 | C  | 51.838000 | -42.751710 | 40.914430 |
| C   | 52.531000 | -43.413060 | 42.112930 | C  | 52.531000 | -43.413060 | 42.112930 | C  | 52.531000 | -43.413060 | 42.112930 |
| C   | 53.154706 | -42.444454 | 43.121748 | C  | 53.232217 | -42.450474 | 43.074418 | C  | 53.445816 | -42.468234 | 42.894720 |
| C   | 53.777181 | -43.233895 | 44.264497 | C  | 53.756892 | -43.245469 | 44.258392 | C  | 54.130191 | -43.247715 | 44.001268 |
| N   | 54.264672 | -42.362832 | 45.378851 | N  | 54.386342 | -42.402625 | 45.322880 | N  | 55.027226 | -42.402317 | 44.832220 |
| Fe  | 54.937796 | -41.864098 | 48.972236 | Fe | 54.887032 | -42.150718 | 49.517931 | Fe | 54.617980 | -41.489044 | 48.155762 |
| C   | 58.109933 | -43.050132 | 49.305287 | C  | 57.810980 | -43.827099 | 49.903675 | C  | 57.541022 | -43.087274 | 48.803243 |
| C   | 53.951362 | -43.802976 | 51.525331 | C  | 53.532482 | -44.070652 | 51.915159 | C  | 52.991833 | -43.529658 | 50.297069 |
| C   | 51.712594 | -41.417959 | 47.986674 | C  | 51.847437 | -41.562015 | 48.160203 | C  | 51.542336 | -40.623486 | 46.709381 |
| C   | 56.005972 | -39.469437 | 46.787832 | C  | 56.395409 | -39.965031 | 47.401737 | C  | 56.214868 | -39.495831 | 45.756257 |
| N   | 55.790079 | -43.286350 | 50.014304 | N  | 55.471651 | -43.722770 | 50.512511 | N  | 55.141805 | -43.245365 | 49.172945 |
| C   | 57.108381 | -43.750798 | 49.905041 | C  | 56.640980 | -44.435294 | 50.243066 | C  | 56.436829 | -43.710824 | 49.333553 |
| C   | 57.276470 | -45.023384 | 50.728733 | C  | 56.392580 | -45.872524 | 50.658340 | C  | 56.427417 | -44.929240 | 50.268142 |
| C   | 56.630074 | -46.254841 | 50.048977 | C  | 55.312225 | -46.559654 | 49.779830 | C  | 56.057073 | -46.192156 | 49.455305 |
| C   | 58.704414 | -45.341673 | 51.165115 | C  | 57.641186 | -46.745470 | 50.666094 | C  | 57.705491 | -45.145870 | 51.097758 |
| C   | 59.736343 | -45.902404 | 50.155836 | C  | 58.138929 | -47.168429 | 49.260550 | C  | 59.011285 | -45.328243 | 50.294756 |
| O   | 59.444174 | -46.067224 | 48.905645 | O  | 57.875503 | -46.407328 | 48.233426 | O  | 59.002294 | -46.211062 | 49.348540 |
| O   | 60.847700 | -46.196148 | 50.635289 | O  | 58.778125 | -48.228866 | 49.163513 | O  | 59.988430 | -44.603861 | 50.577858 |
| C   | 56.343927 | -44.616863 | 51.894788 | C  | 55.668248 | -45.534800 | 51.997567 | C  | 55.188405 | -44.565816 | 51.122501 |
| C   | 55.275863 | -43.853958 | 51.152216 | C  | 54.835013 | -44.355088 | 51.516438 | C  | 54.362271 | -43.749287 | 50.155601 |
| N   | 53.167870 | -42.501314 | 49.624004 | N  | 53.034380 | -42.598994 | 50.031822 | N  | 52.575831 | -42.054012 | 48.395427 |
| C   | 52.948325 | -43.264790 | 50.734141 | C  | 52.666090 | -43.328847 | 51.135352 | C  | 52.156508 | -42.796453 | 49.461540 |
| C   | 51.472510 | -43.471330 | 51.035058 | C  | 51.160304 | -43.334450 | 51.344558 | C  | 50.643871 | -42.753508 | 49.642515 |
| C   | 51.119479 | -44.910525 | 51.423762 | C  | 50.611327 | -44.694357 | 51.787328 | C  | 50.022665 | -44.154098 | 49.727101 |
| C   | 51.071511 | -42.480608 | 52.162329 | C  | 50.810154 | -42.236800 | 52.387382 | C  | 50.330343 | -41.941958 | 50.926921 |
| C   | 49.593802 | -42.669522 | 52.580140 | C  | 49.288024 | -42.180757 | 52.670674 | C  | 48.805380 | -41.880044 | 51.191167 |
| O   | 49.387165 | -43.281917 | 53.667230 | O  | 48.898496 | -42.635018 | 53.782738 | O  | 48.354271 | -42.651520 | 52.086063 |
| O   | 48.717690 | -42.225216 | 51.779537 | O  | 48.561272 | -41.701800 | 51.747501 | O  | 48.140214 | -41.085308 | 50.462656 |
| C   | 50.841535 | -43.069959 | 49.689990 | C  | 50.669188 | -42.921419 | 49.943060 | C  | 50.191413 | -42.009584 | 48.363427 |
| C   | 51.925713 | -42.269913 | 49.027318 | C  | 51.882115 | -42.300824 | 49.313716 | C  | 51.471085 | -41.513925 | 47.747734 |
| N   | 54.045313 | -40.666991 | 47.690891 | N  | 54.255423 | -41.045799 | 47.999983 | N  | 54.004366 | -40.415942 | 46.394679 |
| C   | 52.698756 | -40.622378 | 47.379686 | C  | 52.953597 | -40.884929 | 47.589853 | C  | 52.698255 | -40.046031 | 46.129956 |

|   |           |            |           |   |           |            |           |   |           |            |           |
|---|-----------|------------|-----------|---|-----------|------------|-----------|---|-----------|------------|-----------|
| C | 52.448717 | -39.650050 | 46.355404 | C | 52.884034 | -39.913903 | 46.542107 | C | 52.683410 | -38.926253 | 45.240412 |
| C | 53.653935 | -39.052639 | 46.062423 | C | 54.170948 | -39.424068 | 46.361581 | C | 53.995619 | -38.580258 | 44.990910 |
| C | 54.642904 | -39.691023 | 46.878631 | C | 55.017580 | -40.130294 | 47.267305 | C | 54.821764 | -39.491943 | 45.716526 |
| N | 56.698648 | -41.368165 | 48.193355 | N | 56.749379 | -41.861305 | 48.919200 | N | 56.525922 | -41.428508 | 47.254447 |
| C | 56.976136 | -40.254950 | 47.393123 | C | 57.212673 | -40.760892 | 48.187004 | C | 57.020503 | -40.368351 | 46.495832 |
| C | 58.386448 | -40.066554 | 47.274533 | C | 58.643847 | -40.689565 | 48.281595 | C | 58.436782 | -40.264573 | 46.685914 |
| C | 58.985310 | -41.073674 | 48.008671 | C | 59.048328 | -41.772634 | 49.040403 | C | 58.793464 | -41.257213 | 47.583489 |
| C | 57.928563 | -41.866920 | 48.561856 | C | 57.872254 | -42.505343 | 49.397779 | C | 57.594627 | -41.974904 | 47.916788 |
| C | 52.840247 | -39.229452 | 50.941678 | C | 52.840247 | -39.229452 | 50.941678 | C | 52.840247 | -39.229452 | 50.941678 |
| C | 53.944267 | -40.057244 | 51.586594 | C | 53.763876 | -39.992781 | 51.884559 | C | 54.097768 | -40.067913 | 51.116482 |
| S | 55.403497 | -40.351964 | 50.530191 | S | 55.317880 | -40.514626 | 51.070487 | S | 55.214528 | -39.917904 | 49.666243 |
| H | 56.479429 | -45.748396 | 46.460508 | H | 55.543257 | -45.629177 | 46.518387 | H | 56.091231 | -44.916802 | 47.044708 |
| H | 49.282124 | -52.345202 | 49.463687 | H | 49.451196 | -52.622199 | 49.892483 | H | 49.548846 | -52.571264 | 50.115828 |
| H | 50.835110 | -52.928566 | 50.090058 | H | 51.199961 | -52.455467 | 50.137476 | H | 51.296596 | -52.600013 | 49.818891 |
| H | 50.757821 | -52.137498 | 48.501093 | H | 50.527773 | -52.460712 | 48.491967 | H | 50.168071 | -52.363259 | 48.466867 |
| H | 50.081991 | -49.970602 | 49.614428 | H | 49.334215 | -50.287518 | 48.970463 | H | 49.448901 | -50.157736 | 49.450388 |
| H | 50.155716 | -50.759024 | 51.197047 | H | 49.989240 | -50.284490 | 50.615492 | H | 50.568228 | -50.384016 | 50.803334 |
| H | 52.590696 | -51.213193 | 50.868069 | H | 52.313122 | -50.186817 | 49.693514 | H | 52.500624 | -50.367818 | 49.248710 |
| H | 52.510927 | -50.443193 | 49.262533 | H | 51.646930 | -50.201690 | 48.039657 | H | 51.395283 | -50.231293 | 47.854823 |
| H | 55.422955 | -48.578957 | 50.321277 | H | 53.820687 | -47.379390 | 47.424888 | H | 54.368463 | -47.658209 | 48.010561 |
| H | 54.540632 | -50.049024 | 50.116935 | H | 53.501825 | -48.967242 | 48.031802 | H | 53.546996 | -49.134202 | 47.722258 |
| H | 54.420909 | -46.734400 | 51.293933 | H | 52.450919 | -45.582539 | 48.078689 | H | 52.795035 | -45.701826 | 48.357109 |
| H | 52.726769 | -46.708883 | 51.585636 | H | 50.946834 | -45.932104 | 48.898084 | H | 51.687655 | -46.067783 | 49.620785 |
| H | 52.104145 | -46.580694 | 41.481174 | H | 52.086811 | -46.373354 | 41.619506 | H | 52.183571 | -47.183688 | 41.366395 |
| H | 51.647460 | -46.492965 | 43.192173 | H | 51.567067 | -46.747564 | 43.274709 | H | 51.711724 | -46.133352 | 42.713561 |
| H | 54.160851 | -46.148104 | 42.840643 | H | 54.010918 | -46.099129 | 43.217011 | H | 54.249951 | -46.271305 | 42.433687 |
| H | 54.252640 | -47.745522 | 42.101776 | H | 54.341149 | -47.383970 | 42.062679 | H | 54.155328 | -48.015111 | 42.659270 |
| H | 53.355172 | -48.740400 | 44.277026 | H | 53.628243 | -49.109624 | 43.711709 | H | 53.158836 | -47.591411 | 44.986668 |
| H | 53.478381 | -47.152671 | 45.014253 | H | 53.226105 | -47.874100 | 44.888779 | H | 53.510009 | -45.875258 | 44.752645 |
| H | 54.789321 | -46.064358 | 46.130425 | H | 54.233339 | -46.107809 | 45.495515 | H | 54.537730 | -45.079712 | 46.359514 |
| H | 57.829204 | -48.383701 | 44.697303 | H | 57.545752 | -48.406613 | 45.602617 | H | 57.601768 | -47.600908 | 45.414653 |
| H | 58.076084 | -47.116716 | 45.865970 | H | 57.414011 | -47.132520 | 46.807918 | H | 57.917498 | -46.152190 | 46.383112 |
| H | 57.392846 | -45.230929 | 41.561173 | H | 57.479043 | -45.221852 | 41.542380 | H | 57.202132 | -45.249003 | 41.631488 |
| H | 56.921126 | -45.522779 | 43.248443 | H | 56.862104 | -45.521915 | 43.179528 | H | 57.083318 | -45.546154 | 43.376735 |
| H | 58.636607 | -45.435377 | 42.803684 | H | 58.610808 | -45.448500 | 42.883408 | H | 58.671494 | -45.395801 | 42.605564 |
| H | 58.299840 | -42.964112 | 42.183253 | H | 58.420586 | -42.986417 | 42.313873 | H | 58.152337 | -42.950110 | 42.069907 |
| H | 56.604349 | -43.099455 | 42.618535 | H | 56.671609 | -43.068179 | 42.457205 | H | 56.569753 | -43.128352 | 42.789434 |
| H | 57.330794 | -43.740241 | 44.991662 | H | 56.899761 | -43.657877 | 44.894827 | H | 57.755959 | -43.755545 | 45.005997 |
| H | 57.691149 | -42.066870 | 44.526268 | H | 57.538584 | -42.039557 | 44.492354 | H | 57.971504 | -42.070106 | 44.501197 |
| H | 60.044433 | -42.581913 | 44.159481 | H | 59.855902 | -42.926681 | 44.571661 | H | 60.205878 | -42.523653 | 43.639281 |
| H | 59.747218 | -44.328860 | 44.254048 | H | 59.240498 | -44.578756 | 44.791962 | H | 60.015729 | -44.273831 | 43.870555 |
| H | 59.411900 | -42.432224 | 46.531905 | H | 58.969169 | -42.350949 | 46.763322 | H | 59.891897 | -42.328218 | 46.109004 |
| H | 60.645929 | -43.536417 | 46.312571 | H | 59.793410 | -43.775201 | 46.909555 | H | 61.273886 | -43.161683 | 45.656998 |
| H | 51.416744 | -43.512353 | 40.245855 | H | 51.365991 | -43.509229 | 40.276946 | H | 51.191694 | -43.468287 | 40.392959 |
| H | 52.543359 | -42.142481 | 40.333111 | H | 52.554730 | -42.190788 | 40.299424 | H | 52.575439 | -42.372966 | 40.194003 |
| H | 51.018912 | -42.097942 | 41.243016 | H | 51.058011 | -42.053189 | 41.245701 | H | 51.215632 | -41.906055 | 41.236450 |
| H | 53.315366 | -44.093052 | 41.743914 | H | 53.269612 | -44.142592 | 41.744990 | H | 53.123943 | -44.270350 | 41.759240 |
| H | 51.803567 | -44.045936 | 42.643564 | H | 51.785996 | -43.991315 | 42.681088 | H | 51.771257 | -43.817691 | 42.798743 |
| H | 52.383398 | -41.770543 | 43.525180 | H | 52.524607 | -41.688905 | 43.435270 | H | 52.868357 | -41.635519 | 43.323705 |
| H | 53.914865 | -41.813694 | 42.636708 | H | 54.052920 | -41.921431 | 42.568050 | H | 54.200794 | -42.029672 | 42.223783 |
| H | 54.629126 | -43.839085 | 43.929325 | H | 54.510343 | -43.980440 | 43.944955 | H | 54.731681 | -44.065930 | 43.585794 |
| H | 53.037186 | -43.907910 | 44.712261 | H | 52.936822 | -43.783583 | 44.746978 | H | 53.393308 | -43.674932 | 44.688891 |
| H | 55.084912 | -41.799215 | 45.127699 | H | 55.358741 | -42.155124 | 45.112613 | H | 55.671698 | -41.842654 | 44.261948 |
| H | 54.493327 | -42.939384 | 46.227343 | H | 54.345945 | -42.915839 | 46.230296 | H | 55.601211 | -42.958720 | 45.481499 |
| H | 59.125300 | -43.433698 | 49.383510 | H | 58.730170 | -44.408879 | 49.895603 | H | 58.509227 | -43.391302 | 49.200585 |
| H | 53.665397 | -44.289221 | 52.456561 | H | 53.125199 | -44.614852 | 52.763527 | H | 52.518612 | -44.013070 | 51.150853 |
| H | 50.691234 | -41.305809 | 47.625079 | H | 50.872644 | -41.384326 | 47.708258 | H | 50.591923 | -40.245478 | 46.332990 |
| H | 56.342279 | -38.650085 | 46.153014 | H | 56.864868 | -39.172167 | 46.820320 | H | 56.721352 | -38.704372 | 45.204420 |

|   |           |            |           |   |           |            |           |   |           |            |           |
|---|-----------|------------|-----------|---|-----------|------------|-----------|---|-----------|------------|-----------|
| H | 57.190667 | -46.594269 | 49.176611 | H | 55.652824 | -46.691416 | 48.751622 | H | 56.846936 | -46.456686 | 48.747496 |
| H | 55.598720 | -46.037942 | 49.737141 | H | 54.376597 | -45.989524 | 49.780457 | H | 55.104926 | -46.010200 | 48.938235 |
| H | 56.633518 | -47.074045 | 50.785123 | H | 55.100274 | -47.551418 | 50.200772 | H | 55.919667 | -47.041838 | 50.137235 |
| H | 59.160817 | -44.448951 | 51.616251 | H | 58.473718 | -46.240313 | 51.178858 | H | 57.844699 | -44.299561 | 51.780785 |
| H | 58.662943 | -46.087624 | 51.972769 | H | 57.456558 | -47.674406 | 51.220214 | H | 57.563091 | -46.048688 | 51.711166 |
| H | 51.426900 | -45.598655 | 50.622102 | H | 51.000542 | -45.499112 | 51.148205 | H | 50.242206 | -44.730909 | 48.817676 |
| H | 50.035836 | -45.013599 | 51.555934 | H | 49.515962 | -44.691677 | 51.731335 | H | 48.932550 | -44.075138 | 49.817142 |
| H | 51.581534 | -45.195842 | 52.379667 | H | 50.884872 | -44.923002 | 52.824303 | H | 50.374348 | -44.699314 | 50.614938 |
| H | 51.225892 | -41.456975 | 51.795655 | H | 51.138540 | -41.264584 | 51.997198 | H | 50.725645 | -40.926578 | 50.806076 |
| H | 51.722706 | -42.645847 | 53.029870 | H | 51.351467 | -42.445568 | 53.318458 | H | 50.832735 | -42.414744 | 51.780080 |
| H | 51.469947 | -39.431662 | 45.938313 | H | 51.971633 | -39.592619 | 46.048497 | H | 51.785973 | -38.436320 | 44.874595 |
| H | 53.859623 | -38.269631 | 45.338676 | H | 54.500265 | -38.650107 | 45.674799 | H | 54.362806 | -37.765591 | 44.373687 |
| H | 58.861718 | -39.262832 | 46.720390 | H | 59.258697 | -39.911891 | 47.838282 | H | 59.077332 | -39.512503 | 46.234167 |
| H | 60.042958 | -41.212414 | 48.220446 | H | 60.061813 | -42.053146 | 49.313725 | H | 59.764216 | -41.422489 | 48.045747 |
| H | 52.438807 | -39.739099 | 50.057528 | H | 52.542316 | -39.855849 | 50.094507 | H | 52.293956 | -39.538514 | 50.040712 |
| H | 53.561721 | -41.021078 | 51.945280 | H | 53.264366 | -40.881375 | 52.287339 | H | 53.846483 | -41.127032 | 51.257681 |
| H | 54.356561 | -39.535831 | 52.464328 | H | 54.050415 | -39.364691 | 52.739346 | H | 54.664921 | -39.742808 | 51.998806 |
| H | 51.523941 | -48.709474 | 51.392878 | H | 50.509218 | -48.070913 | 49.666667 | H | 50.674246 | -48.116612 | 49.497597 |
| H | 55.700467 | -48.889846 | 44.066773 | H | 55.854329 | -48.933815 | 44.190483 | H | 55.633103 | -47.936871 | 44.450708 |
| H | 59.052631 | -44.086854 | 46.556048 | H | 58.101332 | -43.793687 | 46.830908 | H | 59.915699 | -44.002065 | 46.234276 |
| H | 53.532711 | -41.689011 | 45.684064 | H | 53.869635 | -41.503424 | 45.475213 | H | 54.491924 | -41.690444 | 45.456272 |
| H | 52.012380 | -39.063432 | 51.647142 | H | 51.929254 | -38.904099 | 51.466167 | H | 52.171100 | -39.332399 | 51.808049 |
| H | 53.224386 | -38.251995 | 50.621730 | H | 53.343423 | -38.339483 | 50.540406 | H | 53.094369 | -38.167367 | 50.827213 |
| O | 54.383698 | -44.182363 | 47.521684 | O | 53.421623 | -44.130812 | 47.415467 | O | 52.933842 | -44.446743 | 46.928219 |
| H | 54.955889 | -44.032489 | 48.322344 | H | 53.995385 | -43.894543 | 48.192911 | H | 52.939141 | -43.564102 | 47.399105 |
| H | 53.493068 | -44.011462 | 47.892323 | H | 52.685033 | -43.475682 | 47.542264 | H | 52.052157 | -44.505445 | 46.519243 |
| O | 57.910186 | -45.088291 | 47.234887 | O | 56.603676 | -44.451277 | 47.257407 | O | 58.957119 | -45.072653 | 47.129126 |
| H | 57.501537 | -44.372232 | 47.774015 | H | 56.299629 | -43.730087 | 47.861895 | H | 58.385629 | -44.358553 | 47.505632 |
| H | 58.519580 | -45.538314 | 48.010331 | H | 57.061462 | -45.153649 | 47.867636 | H | 59.161361 | -45.601167 | 48.031111 |
| H | 51.782450 | -48.070889 | 42.390114 | H | 51.892837 | -48.061324 | 42.124932 | H | 51.663792 | -47.897146 | 42.906252 |
| H | 56.873078 | -43.936367 | 52.581629 | H | 56.389133 | -45.209578 | 52.764822 | H | 55.474754 | -43.923283 | 51.971009 |
| H | 55.965814 | -45.464123 | 52.481934 | H | 55.059665 | -46.354199 | 52.396431 | H | 54.656795 | -45.438667 | 51.518811 |
| H | 50.611687 | -43.967194 | 49.091201 | H | 50.341232 | -43.801864 | 49.365949 | H | 49.668343 | -42.690072 | 47.673747 |
| H | 49.909185 | -42.511719 | 49.832966 | H | 49.812209 | -42.238933 | 50.008733 | H | 49.487517 | -41.203186 | 48.606473 |

**Siroheme (Fe<sup>3+</sup>) without NO<sub>2</sub><sup>-</sup>**

| <b>S=1/2</b> |           |            | <b>S=3/2</b> |   |           | <b>S=5/2</b> |           |   |           |            |           |
|--------------|-----------|------------|--------------|---|-----------|--------------|-----------|---|-----------|------------|-----------|
| C            | 50.353397 | -52.121132 | 49.522288    | C | 50.353397 | -52.121132   | 49.522288 | C | 50.353397 | -52.121132 | 49.522288 |
| C            | 50.454781 | -50.611631 | 49.734789    | C | 50.491166 | -50.626150   | 49.798373 | C | 50.664487 | -50.757622 | 50.136012 |
| C            | 51.779271 | -50.069009 | 49.211069    | C | 51.949269 | -50.192454   | 49.724647 | C | 52.167966 | -50.540361 | 50.269024 |
| N            | 51.877033 | -48.624472 | 49.452553    | N | 52.065937 | -48.746936   | 49.947401 | N | 52.446185 | -49.217861 | 50.834646 |
| C            | 52.831722 | -47.849174 | 48.966172    | C | 53.208540 | -48.083482   | 49.924105 | C | 53.634752 | -48.618421 | 50.803571 |
| N            | 53.840845 | -48.356413 | 48.259534    | N | 54.363287 | -48.705190   | 49.706053 | N | 54.687363 | -49.239263 | 50.250075 |
| N            | 52.767427 | -46.485812 | 49.119610    | N | 53.198909 | -46.711543   | 50.025693 | N | 53.780618 | -47.383847 | 51.308653 |
| C            | 52.225000 | -47.068010 | 42.455410    | C | 52.225000 | -47.068010   | 42.455410 | C | 52.225000 | -47.068010 | 42.455410 |
| C            | 53.683510 | -47.163422 | 42.904752    | C | 53.699291 | -47.053772   | 42.865118 | C | 53.705524 | -47.197286 | 42.820813 |
| C            | 53.835254 | -48.005594 | 44.174454    | C | 53.907951 | -47.622301   | 44.271998 | C | 53.918277 | -47.396292 | 44.325695 |
| N            | 55.234645 | -48.213238 | 44.555838    | N | 55.323259 | -47.769112   | 44.615416 | N | 55.293838 | -47.794272 | 44.629918 |
| C            | 55.945323 | -47.455640 | 45.394353    | C | 56.045111 | -46.982777   | 45.419375 | C | 56.197659 | -47.129296 | 45.353779 |
| N            | 55.375569 | -46.502710 | 46.157262    | N | 55.470329 | -46.009659   | 46.155786 | N | 55.900936 | -46.021127 | 46.046873 |
| N            | 57.263664 | -47.662106 | 45.523242    | N | 57.370580 | -47.130403   | 45.502905 | N | 57.471225 | -47.553816 | 45.364499 |
| C            | 57.646397 | -45.007662 | 42.604348    | C | 57.646397 | -45.007662   | 42.604348 | C | 57.646397 | -45.007662 | 42.604348 |
| C            | 57.606397 | -43.479422 | 42.863688    | C | 57.606397 | -43.479422   | 42.863688 | C | 57.606397 | -43.479422 | 42.863688 |
| C            | 57.906450 | -43.113118 | 44.323758    | C | 58.110346 | -43.114706   | 44.264852 | C | 58.009662 | -43.110955 | 44.298678 |
| C            | 59.329291 | -43.478369 | 44.734768    | C | 59.606979 | -43.374309   | 44.408286 | C | 59.492309 | -43.369059 | 44.549622 |
| N            | 59.480420 | -43.401777 | 46.221270    | N | 60.014447 | -43.340038   | 45.847708 | N | 59.815468 | -43.265801 | 46.005831 |
| C            | 51.838000 | -42.751710 | 40.914430    | C | 51.838000 | -42.751710   | 40.914430 | C | 51.838000 | -42.751710 | 40.914430 |
| C            | 52.531000 | -43.413060 | 42.112930    | C | 52.531000 | -43.413060   | 42.112930 | C | 52.531000 | -43.413060 | 42.112930 |
| C            | 53.346881 | -42.390555 | 42.910653    | C | 52.335607 | -42.765965   | 43.487128 | C | 53.355289 | -42.474809 | 42.995373 |

|    |           |            |           |    |           |            |           |    |           |            |           |
|----|-----------|------------|-----------|----|-----------|------------|-----------|----|-----------|------------|-----------|
| C  | 53.918339 | -42.957014 | 44.199317 | C  | 52.919974 | -43.707483 | 44.532666 | C  | 53.850959 | -43.260023 | 44.197452 |
| N  | 54.725871 | -41.902100 | 44.903372 | N  | 52.755389 | -43.216482 | 45.937280 | N  | 54.507533 | -42.407967 | 45.242103 |
| Fe | 54.986149 | -41.903946 | 49.050763 | Fe | 54.852757 | -41.695951 | 48.479715 | Fe | 55.179188 | -41.643499 | 49.363191 |
| C  | 58.016828 | -43.340333 | 49.632094 | C  | 57.993160 | -42.867263 | 49.122967 | C  | 58.357552 | -43.046526 | 49.496173 |
| C  | 53.595991 | -43.960076 | 51.311692 | C  | 53.650220 | -43.703348 | 50.932695 | C  | 54.163140 | -43.974172 | 51.626617 |
| C  | 51.937598 | -41.275662 | 47.675842 | C  | 51.637355 | -40.844478 | 47.599138 | C  | 51.907715 | -41.543720 | 48.102228 |
| C  | 56.454981 | -39.567101 | 47.034105 | C  | 56.059342 | -39.806445 | 45.874190 | C  | 56.204497 | -39.599071 | 46.820188 |
| N  | 55.620929 | -43.463544 | 50.056864 | N  | 55.633385 | -43.184875 | 49.612769 | N  | 56.054320 | -43.365267 | 50.219223 |
| C  | 56.904229 | -44.016638 | 50.020029 | C  | 56.969727 | -43.579564 | 49.664105 | C  | 57.368892 | -43.784364 | 50.087886 |
| C  | 56.859221 | -45.403967 | 50.649982 | C  | 57.112778 | -44.817250 | 50.546498 | C  | 57.541794 | -45.104778 | 50.837830 |
| C  | 56.156583 | -46.427462 | 49.718822 | C  | 56.690148 | -46.101389 | 49.790722 | C  | 56.917222 | -46.290392 | 50.057402 |
| C  | 58.206920 | -45.951084 | 51.100118 | C  | 58.473385 | -45.002902 | 51.214905 | C  | 58.967463 | -45.436542 | 51.264224 |
| C  | 59.242818 | -46.361739 | 50.021560 | C  | 59.703498 | -45.474418 | 50.403121 | C  | 60.008244 | -45.887690 | 50.207475 |
| O  | 58.997568 | -46.203899 | 48.754854 | O  | 59.635897 | -45.668355 | 49.126233 | O  | 59.719132 | -45.933693 | 48.945171 |
| O  | 60.301534 | -46.851628 | 50.448488 | O  | 60.738469 | -45.659761 | 51.067872 | O  | 61.121032 | -46.208890 | 50.658804 |
| C  | 55.857735 | -45.058499 | 51.779265 | C  | 55.983476 | -44.489107 | 51.544343 | C  | 56.568703 | -44.795834 | 52.007514 |
| C  | 54.943970 | -44.104668 | 51.048435 | C  | 55.001682 | -43.765432 | 50.661728 | C  | 55.507138 | -44.002910 | 51.283036 |
| N  | 53.119118 | -42.479340 | 49.443042 | N  | 52.979110 | -42.250468 | 49.092185 | N  | 53.331114 | -42.672791 | 49.738525 |
| C  | 52.725248 | -43.268038 | 50.488663 | C  | 52.707912 | -43.048100 | 50.161790 | C  | 53.142065 | -43.420573 | 50.859935 |
| C  | 51.214380 | -43.296370 | 50.670571 | C  | 51.232257 | -43.103807 | 50.514206 | C  | 51.670354 | -43.581557 | 51.198088 |
| C  | 50.617677 | -44.655106 | 51.052188 | C  | 50.696321 | -44.539502 | 50.595099 | C  | 51.278530 | -45.019457 | 51.553307 |
| C  | 50.892636 | -42.245589 | 51.775055 | C  | 51.038684 | -42.370795 | 51.868410 | C  | 51.370957 | -42.610694 | 52.373622 |
| C  | 49.360913 | -42.066230 | 51.953971 | C  | 49.534667 | -42.317672 | 52.247313 | C  | 49.866784 | -42.655945 | 52.758421 |
| O  | 48.826304 | -42.695036 | 52.909174 | O  | 49.139277 | -43.172725 | 53.088140 | O  | 49.565659 | -43.357181 | 53.762646 |
| O  | 48.787271 | -41.329273 | 51.099816 | O  | 48.839529 | -41.447053 | 51.647393 | O  | 49.083443 | -42.009869 | 52.002365 |
| C  | 50.753545 | -42.800763 | 49.289231 | C  | 50.601992 | -42.321903 | 49.348652 | C  | 50.996428 | -43.097426 | 49.894959 |
| C  | 51.973663 | -42.129347 | 48.736596 | C  | 51.773252 | -41.749748 | 48.611185 | C  | 52.095295 | -42.376842 | 49.170364 |
| N  | 54.346051 | -40.733167 | 47.599356 | N  | 54.013054 | -40.676275 | 46.950279 | N  | 54.228444 | -40.761027 | 47.746933 |
| C  | 53.039206 | -40.570142 | 47.174751 | C  | 52.683091 | -40.322472 | 46.822371 | C  | 52.893229 | -40.777389 | 47.436088 |
| C  | 52.958303 | -39.529907 | 46.197083 | C  | 52.506326 | -39.400128 | 45.746386 | C  | 52.637805 | -39.875436 | 46.348001 |
| C  | 54.224738 | -38.992937 | 46.073714 | C  | 53.751067 | -39.153479 | 45.220112 | C  | 53.840226 | -39.277626 | 46.025762 |
| C  | 55.083508 | -39.736013 | 46.936297 | C  | 54.689193 | -39.916964 | 45.979336 | C  | 54.834779 | -39.837809 | 46.891238 |
| N  | 56.859854 | -41.514241 | 48.475395 | N  | 56.644470 | -41.402887 | 47.660783 | N  | 56.957090 | -41.384101 | 48.339026 |
| C  | 57.295744 | -40.399218 | 47.748414 | C  | 56.973006 | -40.444460 | 46.700711 | C  | 57.200004 | -40.300260 | 47.497474 |
| C  | 58.721907 | -40.300409 | 47.807698 | C  | 58.376160 | -40.211365 | 46.706286 | C  | 58.610635 | -40.090447 | 47.396071 |
| C  | 59.162941 | -41.359913 | 48.571185 | C  | 58.918185 | -41.037416 | 47.675343 | C  | 59.222251 | -41.059803 | 48.170811 |
| C  | 58.000958 | -42.097855 | 48.970176 | C  | 57.839143 | -41.784039 | 48.233009 | C  | 58.177822 | -41.859922 | 48.740632 |
| C  | 52.840247 | -39.229452 | 50.941678 | C  | 52.840247 | -39.229452 | 50.941678 | C  | 52.840247 | -39.229452 | 50.941678 |
| C  | 53.878954 | -40.134107 | 51.591330 | C  | 54.097499 | -40.001289 | 51.313386 | C  | 53.928928 | -39.816954 | 51.828877 |
| S  | 55.339710 | -40.448438 | 50.551069 | S  | 55.329301 | -40.008710 | 49.960554 | S  | 55.518839 | -40.106350 | 50.954090 |
| H  | 56.048365 | -45.855975 | 46.615992 | H  | 56.097355 | -45.528220 | 46.796138 | H  | 56.680685 | -45.615382 | 46.599799 |
| H  | 49.402172 | -52.501911 | 49.911214 | H  | 49.303987 | -52.431320 | 49.588355 | H  | 49.271034 | -52.263454 | 49.422816 |
| H  | 51.165011 | -52.650315 | 50.038984 | H  | 50.924584 | -52.713500 | 50.249683 | H  | 50.742876 | -52.936302 | 50.146362 |
| H  | 50.406232 | -52.376367 | 48.455395 | H  | 50.717216 | -52.373958 | 48.517074 | H  | 50.798971 | -52.217509 | 48.522891 |
| H  | 49.628264 | -50.098195 | 49.223178 | H  | 49.907746 | -50.050514 | 49.064833 | H  | 50.242261 | -49.954942 | 49.514176 |
| H  | 50.370850 | -50.377203 | 50.805995 | H  | 50.093460 | -50.384410 | 50.794720 | H  | 50.199811 | -50.676274 | 51.129692 |
| H  | 52.619205 | -50.576773 | 49.710338 | H  | 52.541661 | -50.722814 | 50.485863 | H  | 52.610313 | -51.321604 | 50.906844 |
| H  | 51.864153 | -50.245134 | 48.128462 | H  | 52.367363 | -50.429391 | 48.734157 | H  | 52.639826 | -50.598523 | 49.277182 |
| H  | 54.492829 | -47.743232 | 47.769866 | H  | 55.238451 | -48.193061 | 49.726362 | H  | 55.600070 | -48.800029 | 50.283266 |
| H  | 53.993887 | -49.356354 | 48.212282 | H  | 54.409024 | -49.715788 | 49.647540 | H  | 54.671928 | -50.244214 | 50.124367 |
| H  | 53.651963 | -46.049637 | 49.389378 | H  | 54.050585 | -46.297212 | 50.403992 | H  | 54.665246 | -46.900268 | 51.204681 |
| H  | 52.010246 | -46.152618 | 49.720160 | H  | 52.377376 | -46.312090 | 50.485466 | H  | 52.967038 | -46.803842 | 51.490307 |
| H  | 52.139540 | -46.493942 | 41.525961 | H  | 52.093797 | -46.648228 | 41.451827 | H  | 52.106047 | -46.874711 | 41.383069 |
| H  | 51.602082 | -46.574126 | 43.213149 | H  | 51.602268 | -46.486074 | 43.149767 | H  | 51.745804 | -46.243156 | 42.999531 |
| H  | 54.098022 | -46.159469 | 43.083994 | H  | 54.105727 | -46.032737 | 42.824166 | H  | 54.269368 | -46.311312 | 42.491569 |
| H  | 54.292902 | -47.615137 | 42.109577 | H  | 54.286845 | -47.651025 | 42.153330 | H  | 54.141050 | -48.055922 | 42.288443 |
| H  | 53.397769 | -49.000187 | 44.023247 | H  | 53.442089 | -48.612481 | 44.355712 | H  | 53.242542 | -48.175416 | 44.705202 |
| H  | 53.297437 | -47.552167 | 45.016898 | H  | 53.423677 | -46.987086 | 45.022687 | H  | 53.683174 | -46.476858 | 44.874171 |

|   |           |            |           |   |           |            |           |   |           |            |           |
|---|-----------|------------|-----------|---|-----------|------------|-----------|---|-----------|------------|-----------|
| H | 54.421038 | -46.162618 | 45.975448 | H | 54.489279 | -46.071596 | 46.443442 | H | 54.957981 | -45.824378 | 46.373043 |
| H | 57.723060 | -48.433637 | 45.055707 | H | 57.871839 | -47.699858 | 44.832500 | H | 57.792070 | -48.283739 | 44.741441 |
| H | 57.786041 | -47.159158 | 46.232298 | H | 57.887590 | -46.460609 | 46.091200 | H | 58.143569 | -47.126695 | 45.990638 |
| H | 57.307877 | -45.233104 | 41.587102 | H | 57.275077 | -45.240658 | 41.598743 | H | 57.325837 | -45.233024 | 41.580521 |
| H | 56.989927 | -45.539429 | 43.307079 | H | 57.011676 | -45.533435 | 43.328777 | H | 56.972067 | -45.532610 | 43.294048 |
| H | 58.657180 | -45.416370 | 42.713469 | H | 58.661375 | -45.415977 | 42.681440 | H | 58.652777 | -45.422605 | 42.734319 |
| H | 58.314067 | -42.967147 | 42.197079 | H | 58.203441 | -42.954749 | 42.103178 | H | 58.261444 | -42.959241 | 42.150551 |
| H | 56.610509 | -43.096507 | 42.594992 | H | 56.574865 | -43.118138 | 42.752603 | H | 56.590918 | -43.106442 | 42.667191 |
| H | 57.206932 | -43.653809 | 44.982731 | H | 57.562914 | -43.716232 | 45.007177 | H | 57.420218 | -43.717031 | 45.006578 |
| H | 57.762187 | -42.033207 | 44.490252 | H | 57.897200 | -42.061176 | 44.492366 | H | 57.794791 | -42.049660 | 44.501240 |
| H | 60.067948 | -42.815615 | 44.273768 | H | 60.197865 | -42.627487 | 43.867981 | H | 60.119460 | -42.656329 | 44.004317 |
| H | 59.568170 | -44.509848 | 44.459192 | H | 59.883497 | -44.365923 | 44.037206 | H | 59.775679 | -44.381640 | 44.246340 |
| H | 59.341428 | -42.446050 | 46.599573 | H | 59.785193 | -42.425472 | 46.278543 | H | 59.604489 | -42.328218 | 46.393444 |
| H | 60.411175 | -43.709901 | 46.521020 | H | 61.016712 | -43.510771 | 45.969899 | H | 60.806022 | -43.457243 | 46.185923 |
| H | 51.274337 | -43.488122 | 40.327547 | H | 52.054070 | -43.311946 | 39.996934 | H | 51.261116 | -43.492688 | 40.348730 |
| H | 52.572617 | -42.279540 | 40.247165 | H | 52.181227 | -41.718241 | 40.768938 | H | 52.568159 | -42.297599 | 40.231270 |
| H | 51.135940 | -41.975827 | 41.249002 | H | 50.748226 | -42.728237 | 41.050407 | H | 51.148123 | -41.963538 | 41.243769 |
| H | 53.193393 | -44.220863 | 41.768113 | H | 53.612102 | -43.476867 | 41.910488 | H | 53.181722 | -44.224823 | 41.752186 |
| H | 51.778232 | -43.875218 | 42.769098 | H | 52.177081 | -44.451641 | 42.175469 | H | 51.764792 | -43.892052 | 42.742001 |
| H | 52.706177 | -41.530857 | 43.161821 | H | 51.264403 | -42.615076 | 43.692490 | H | 52.730720 | -41.637547 | 43.342570 |
| H | 54.164505 | -42.004248 | 42.282379 | H | 52.823087 | -41.780728 | 43.538917 | H | 54.197931 | -42.044830 | 42.434818 |
| H | 54.587604 | -43.809328 | 44.024623 | H | 53.993679 | -43.869521 | 44.380825 | H | 54.570576 | -44.039348 | 43.917561 |
| H | 53.136090 | -43.269347 | 44.899731 | H | 52.414415 | -44.678424 | 44.482719 | H | 53.005055 | -43.743472 | 44.698953 |
| H | 55.602926 | -41.701539 | 44.409880 | H | 53.426720 | -42.455352 | 46.178297 | H | 55.479588 | -42.174905 | 45.013547 |
| H | 54.946891 | -42.140643 | 45.883253 | H | 52.863077 | -43.998631 | 46.619778 | H | 54.469084 | -42.919107 | 46.157886 |
| H | 58.986022 | -43.812632 | 49.768265 | H | 59.011254 | -43.180887 | 49.339601 | H | 59.376921 | -43.418223 | 49.569783 |
| H | 53.185016 | -44.509266 | 52.155418 | H | 53.300958 | -44.200622 | 51.835477 | H | 53.874728 | -44.490685 | 52.540384 |
| H | 50.968225 | -41.065717 | 47.227329 | H | 50.630923 | -40.499996 | 47.368644 | H | 50.882840 | -41.408386 | 47.759837 |
| H | 56.900995 | -38.740945 | 46.482377 | H | 56.452224 | -39.122776 | 45.123250 | H | 56.531010 | -38.816887 | 46.135670 |
| H | 56.864859 | -46.908104 | 49.041706 | H | 57.448400 | -46.431170 | 49.079180 | H | 57.517129 | -46.582940 | 49.194771 |
| H | 55.405699 | -45.919378 | 49.100160 | H | 55.748628 | -45.937622 | 49.246486 | H | 55.902940 | -46.049625 | 49.710303 |
| H | 55.673915 | -47.205731 | 50.322713 | H | 56.559264 | -46.900758 | 50.535583 | H | 56.883949 | -47.151000 | 50.742771 |
| H | 58.707639 | -45.230791 | 51.762831 | H | 58.766608 | -44.069564 | 51.716032 | H | 59.409028 | -44.581929 | 51.796221 |
| H | 58.044474 | -46.851690 | 51.709640 | H | 58.360527 | -45.743446 | 52.020548 | H | 58.932472 | -46.253412 | 51.999520 |
| H | 50.555091 | -45.323468 | 50.180125 | H | 50.859007 | -45.066394 | 49.643628 | H | 51.507976 | -45.691325 | 50.712806 |
| H | 49.589310 | -44.522790 | 51.407826 | H | 49.618348 | -44.524960 | 50.792612 | H | 50.201064 | -45.078626 | 51.745140 |
| H | 51.172501 | -45.145832 | 51.860638 | H | 51.153409 | -45.091354 | 51.430228 | H | 51.778651 | -45.359750 | 52.470668 |
| H | 51.327656 | -41.283741 | 51.482272 | H | 51.427809 | -41.349729 | 51.777379 | H | 51.629358 | -41.590718 | 52.061231 |
| H | 51.345686 | -42.572166 | 52.719822 | H | 51.599013 | -42.896620 | 52.650933 | H | 51.987152 | -42.888545 | 53.237511 |
| H | 52.042571 | -39.208839 | 45.710864 | H | 51.551059 | -38.983007 | 45.444417 | H | 51.662933 | -39.693937 | 45.906476 |
| H | 54.544597 | -38.168229 | 45.444428 | H | 54.017685 | -38.487979 | 44.405020 | H | 54.030004 | -38.530519 | 45.261300 |
| H | 59.309650 | -39.520633 | 47.333479 | H | 58.887161 | -39.496386 | 46.069292 | H | 59.084271 | -39.300374 | 46.821485 |
| H | 60.181612 | -41.608273 | 48.854736 | H | 59.949814 | -41.097206 | 48.012086 | H | 60.283725 | -41.189898 | 48.363181 |
| H | 52.404418 | -39.705263 | 50.055185 | H | 52.337141 | -39.679817 | 50.078695 | H | 52.572890 | -39.912802 | 50.127908 |
| H | 53.456054 | -41.093669 | 51.910535 | H | 53.870646 | -41.039581 | 51.582616 | H | 53.622486 | -40.774310 | 52.267187 |
| H | 54.308662 | -39.661296 | 52.487442 | H | 54.600512 | -39.541144 | 52.173665 | H | 54.176661 | -39.138314 | 52.654391 |
| H | 51.203383 | -48.207878 | 50.089755 | H | 51.216824 | -48.233667 | 50.168174 | H | 51.700716 | -48.762773 | 51.353374 |
| H | 55.751267 | -48.906217 | 44.021653 | H | 55.839949 | -48.470180 | 44.092233 | H | 55.618242 | -48.643394 | 44.176152 |
| H | 58.749271 | -44.038612 | 46.671574 | H | 59.461062 | -44.072035 | 46.387751 | H | 59.222356 | -43.973399 | 46.552140 |
| H | 54.194643 | -41.005223 | 44.968294 | H | 51.822161 | -42.810087 | 46.090448 | H | 53.998105 | -41.510442 | 45.361255 |
| H | 52.028850 | -39.011974 | 51.648679 | H | 52.135071 | -39.212775 | 51.784471 | H | 51.937090 | -39.041059 | 51.538759 |
| H | 53.289411 | -38.278321 | 50.630314 | H | 53.083321 | -38.191027 | 50.683668 | H | 53.163862 | -38.279866 | 50.496984 |
| O | 52.742278 | -45.420892 | 46.384896 | O | 52.835588 | -45.679192 | 47.350064 | O | 53.910312 | -44.214078 | 47.306679 |
| H | 52.568646 | -45.693073 | 47.316884 | H | 52.982739 | -45.944985 | 48.295926 | H | 54.013937 | -43.832206 | 48.211955 |
| H | 51.876548 | -45.468660 | 45.945082 | H | 52.010484 | -46.129925 | 47.095428 | H | 52.941219 | -44.268872 | 47.213140 |
| O | 57.494875 | -44.988161 | 47.224013 | O | 58.295231 | -45.023861 | 47.156056 | O | 58.150044 | -44.957652 | 47.311927 |
| H | 57.043803 | -44.309327 | 47.764702 | H | 57.766670 | -44.269600 | 47.488755 | H | 57.707236 | -44.268906 | 47.851102 |
| H | 58.081570 | -45.508855 | 47.987431 | H | 58.814449 | -45.310264 | 48.060995 | H | 58.781614 | -45.402640 | 48.082519 |



|   |           |            |           |   |           |            |           |   |           |            |           |
|---|-----------|------------|-----------|---|-----------|------------|-----------|---|-----------|------------|-----------|
| H | 51.805009 | -48.065356 | 42.272830 | H | 51.832925 | -48.093925 | 42.443086 | H | 51.681249 | -47.991008 | 42.696310 |
| H | 56.366657 | -44.519451 | 52.594963 | H | 56.340215 | -43.786826 | 52.315694 | H | 57.055375 | -44.146026 | 52.752970 |
| H | 55.338049 | -45.925830 | 52.200104 | H | 55.566118 | -45.364307 | 52.057011 | H | 56.194192 | -45.685936 | 52.526177 |
| H | 50.467028 | -43.647996 | 48.644968 | H | 50.017463 | -42.978689 | 48.687568 | H | 50.643182 | -43.950671 | 49.294834 |
| H | 49.894899 | -42.121518 | 49.365811 | H | 49.913129 | -41.549723 | 49.720262 | H | 50.130019 | -42.458793 | 50.112156 |

**Table S8.** Cartesian coordinates (Å) of the heme species (Fe<sup>2+</sup> & Fe<sup>3+</sup>) with ligands (and without the cubane cluster) optimized at DFT (BP86 functional) using TZ2P basis sets. S is the spin state of the species.

| Heme (Fe <sup>2+</sup> ) with HSO <sub>3</sub> <sup>-</sup> |           |           |           |     |           |           |           |     |           |           |           |
|-------------------------------------------------------------|-----------|-----------|-----------|-----|-----------|-----------|-----------|-----|-----------|-----------|-----------|
| S=0                                                         |           |           |           | S=1 |           |           |           | S=2 |           |           |           |
| C                                                           | 50.331000 | 4.395000  | 71.629000 | C   | 50.331000 | 4.395000  | 71.629000 | C   | 50.331000 | 4.395000  | 71.629000 |
| C                                                           | 50.847628 | 5.820518  | 71.412240 | C   | 50.881592 | 5.807970  | 71.413850 | C   | 50.773203 | 5.820291  | 71.284222 |
| C                                                           | 51.401352 | 6.047370  | 70.004363 | C   | 51.476031 | 6.004202  | 70.018816 | C   | 51.492093 | 5.910744  | 69.936644 |
| N                                                           | 51.836944 | 7.438891  | 69.860476 | N   | 51.958263 | 7.379944  | 69.868506 | N   | 51.839424 | 7.305302  | 69.651701 |
| C                                                           | 52.601541 | 7.926852  | 68.875050 | C   | 52.773948 | 7.818547  | 68.903395 | C   | 52.793206 | 7.728734  | 68.814021 |
| N                                                           | 52.950023 | 7.165172  | 67.832933 | N   | 53.143275 | 7.021200  | 67.897097 | N   | 53.425289 | 6.883528  | 67.994469 |
| N                                                           | 53.077420 | 9.180679  | 68.942872 | N   | 53.273885 | 9.063442  | 68.954943 | N   | 53.151226 | 9.022072  | 68.815280 |
| C                                                           | 52.225000 | 2.268000  | 63.346000 | C   | 52.225000 | 2.268000  | 63.346000 | C   | 52.225000 | 2.268000  | 63.346000 |
| C                                                           | 53.718495 | 2.555365  | 63.476468 | C   | 53.716799 | 2.571825  | 63.457739 | C   | 53.746776 | 2.177729  | 63.413382 |
| C                                                           | 54.180061 | 2.547778  | 64.943835 | C   | 54.202150 | 2.537093  | 64.917056 | C   | 54.242847 | 1.981321  | 64.860107 |
| N                                                           | 55.427842 | 3.279627  | 65.161458 | N   | 55.445076 | 3.277355  | 65.131017 | N   | 55.559479 | 2.562123  | 65.110567 |
| C                                                           | 55.497843 | 4.617541  | 65.074872 | C   | 55.499719 | 4.617799  | 65.092355 | C   | 55.764253 | 3.888365  | 65.155882 |
| N                                                           | 54.378283 | 5.340759  | 64.989804 | N   | 54.369381 | 5.330304  | 65.039902 | N   | 54.721737 | 4.721779  | 65.097743 |
| N                                                           | 56.682261 | 5.241770  | 65.068365 | N   | 56.675051 | 5.255430  | 65.112974 | N   | 57.000123 | 4.383603  | 65.275005 |
| C                                                           | 57.624000 | 3.668000  | 61.733000 | C   | 57.624000 | 3.668000  | 61.733000 | C   | 57.624000 | 3.668000  | 61.733000 |
| C                                                           | 57.584000 | 4.849000  | 60.729000 | C   | 57.584000 | 4.849000  | 60.729000 | C   | 57.584000 | 4.849000  | 60.729000 |
| C                                                           | 57.500151 | 6.228527  | 61.403919 | C   | 57.460772 | 6.227937  | 61.400015 | C   | 57.607143 | 6.220954  | 61.419759 |
| C                                                           | 58.790317 | 6.647973  | 62.098539 | C   | 58.740334 | 6.674347  | 62.097505 | C   | 58.994768 | 6.592715  | 61.928337 |
| N                                                           | 58.653058 | 8.014289  | 62.690010 | N   | 58.578851 | 8.040344  | 62.682204 | N   | 58.937057 | 7.840311  | 62.747499 |
| C                                                           | 51.838000 | 3.862000  | 59.049000 | C   | 51.838000 | 3.862000  | 59.049000 | C   | 51.838000 | 3.862000  | 59.049000 |
| C                                                           | 52.531000 | 4.355000  | 60.326000 | C   | 52.531000 | 4.355000  | 60.326000 | C   | 52.531000 | 4.355000  | 60.326000 |
| C                                                           | 53.181875 | 5.724870  | 60.171214 | C   | 53.057986 | 5.783046  | 60.244515 | C   | 53.149149 | 5.755903  | 60.338783 |
| C                                                           | 53.761180 | 6.155764  | 61.501897 | C   | 53.694494 | 6.142443  | 61.572494 | C   | 53.802423 | 5.944300  | 61.704713 |
| N                                                           | 54.337383 | 7.527291  | 61.463420 | N   | 54.093055 | 7.570265  | 61.654344 | N   | 54.326163 | 7.317789  | 61.950778 |
| Fe                                                          | 55.359214 | 10.915575 | 64.364410 | Fe  | 55.332627 | 10.957020 | 64.395150 | Fe  | 55.328463 | 10.943066 | 64.085480 |
| C                                                           | 57.889845 | 11.441675 | 66.574581 | C   | 57.894702 | 11.432194 | 66.615426 | C   | 57.883901 | 11.127743 | 66.409076 |
| C                                                           | 53.016632 | 11.389360 | 66.794250 | C   | 53.043565 | 11.492788 | 66.838038 | C   | 53.031457 | 11.315598 | 66.572272 |
| C                                                           | 52.825546 | 10.292187 | 62.089474 | C   | 52.802053 | 10.284482 | 62.151141 | C   | 52.852832 | 10.028359 | 61.882386 |
| C                                                           | 57.638629 | 10.814417 | 61.783659 | C   | 57.612419 | 10.818300 | 61.799021 | C   | 57.670103 | 10.560893 | 61.577180 |
| N                                                           | 55.468828 | 11.381414 | 66.286884 | N   | 55.475052 | 11.437916 | 66.333562 | N   | 55.468782 | 11.147930 | 66.136839 |
| C                                                           | 56.581411 | 11.603883 | 67.019460 | C   | 56.602590 | 11.621315 | 67.068847 | C   | 56.587098 | 11.278749 | 66.880633 |
| C                                                           | 56.270043 | 12.115557 | 68.421692 | C   | 56.295417 | 12.098242 | 68.492992 | C   | 56.279562 | 11.741996 | 68.308623 |
| C                                                           | 56.701773 | 11.147314 | 69.551935 | C   | 56.706161 | 11.085925 | 69.590037 | C   | 56.632580 | 10.703966 | 69.400490 |
| C                                                           | 56.851337 | 13.542518 | 68.668796 | C   | 56.886428 | 13.509319 | 68.784206 | C   | 56.928615 | 13.123501 | 68.621918 |
| C                                                           | 58.349776 | 13.728755 | 69.040888 | C   | 58.394298 | 13.675137 | 69.131797 | C   | 58.437231 | 13.224568 | 68.983018 |
| O                                                           | 59.151858 | 12.750457 | 68.966176 | O   | 59.171882 | 12.676655 | 69.091775 | O   | 59.180626 | 12.199313 | 68.918158 |
| O                                                           | 58.637739 | 14.905362 | 69.399660 | O   | 58.710034 | 14.858530 | 69.443058 | O   | 58.796271 | 14.385005 | 69.328849 |
| C                                                           | 54.786142 | 12.160259 | 68.345306 | C   | 54.808839 | 12.167007 | 68.419899 | C   | 54.796226 | 11.874894 | 68.218616 |
| C                                                           | 54.357732 | 11.672809 | 67.137545 | C   | 54.387345 | 11.733426 | 67.183064 | C   | 54.375523 | 11.488169 | 66.976328 |
| N                                                           | 53.339251 | 10.735949 | 64.470167 | N   | 53.359217 | 10.794163 | 64.523995 | N   | 53.396569 | 10.633696 | 64.241782 |
| C                                                           | 52.575058 | 10.938435 | 65.577896 | C   | 52.597168 | 11.003933 | 65.643956 | C   | 52.613780 | 10.861097 | 65.362103 |
| C                                                           | 51.087283 | 10.660256 | 65.317441 | C   | 51.121907 | 10.682502 | 65.420385 | C   | 51.130682 | 10.583569 | 65.104761 |
| C                                                           | 50.536889 | 9.596752  | 66.286862 | C   | 50.646440 | 9.571823  | 66.383279 | C   | 50.551750 | 9.578163  | 66.122192 |
| C                                                           | 50.286757 | 11.981467 | 65.465503 | C   | 50.255955 | 11.956685 | 65.612111 | C   | 50.335218 | 11.917949 | 65.176343 |
| C                                                           | 48.756044 | 11.899995 | 65.246040 | C   | 48.732395 | 11.796789 | 65.372670 | C   | 48.809447 | 11.828320 | 64.924095 |
| O                                                           | 48.092956 | 12.835990 | 65.784280 | O   | 48.020486 | 12.704453 | 65.893312 | O   | 48.132925 | 12.773513 | 65.426589 |
| O                                                           | 48.290453 | 10.952515 | 64.548554 | O   | 48.324642 | 10.819304 | 64.680489 | O   | 48.364899 | 10.865222 | 64.234550 |
| C                                                           | 51.141248 | 10.233753 | 63.881155 | C   | 51.162026 | 10.272067 | 63.989309 | C   | 51.199245 | 10.082360 | 63.699787 |
| C                                                           | 52.442363 | 10.374382 | 63.445582 | C   | 52.454378 | 10.410693 | 63.506039 | C   | 52.492071 | 10.218303 | 63.231811 |
| N                                                           | 55.259792 | 10.573359 | 62.379974 | N   | 55.233124 | 10.565199 | 62.397993 | N   | 55.278718 | 10.342730 | 62.150185 |
| C                                                           | 54.098978 | 10.447428 | 61.610986 | C   | 54.082920 | 10.428126 | 61.643213 | C   | 54.137004 | 10.151236 | 61.382361 |
| C                                                           | 54.437151 | 10.421969 | 60.199482 | C   | 54.410586 | 10.352583 | 60.238409 | C   | 54.493914 | 9.968747  | 59.998581 |
| C                                                           | 55.791523 | 10.526392 | 60.117882 | C   | 55.774463 | 10.455752 | 60.144695 | C   | 55.861013 | 10.064779 | 59.924573 |
| C                                                           | 56.293543 | 10.637288 | 61.475074 | C   | 56.275938 | 10.610825 | 61.485077 | C   | 56.339297 | 10.318405 | 61.254787 |



|   |           |           |           |   |           |           |           |   |           |           |           |
|---|-----------|-----------|-----------|---|-----------|-----------|-----------|---|-----------|-----------|-----------|
| H | 58.344724 | 10.870302 | 60.955168 | H | 58.321734 | 10.863373 | 60.971437 | H | 58.393522 | 10.568586 | 60.761779 |
| H | 57.783117 | 10.975333 | 69.522985 | H | 57.790149 | 10.928744 | 69.570101 | H | 57.721794 | 10.608046 | 69.480679 |
| H | 56.131402 | 10.209157 | 69.485154 | H | 56.156780 | 10.142664 | 69.462995 | H | 56.154687 | 9.739870  | 69.185165 |
| H | 56.461765 | 11.600449 | 70.522927 | H | 56.442498 | 11.492524 | 70.575726 | H | 56.254455 | 11.062178 | 70.367454 |
| H | 56.654570 | 14.161808 | 67.781571 | H | 56.675222 | 14.163296 | 67.926319 | H | 56.751869 | 13.796985 | 67.771004 |
| H | 56.270943 | 13.993609 | 69.486202 | H | 56.328735 | 13.933694 | 69.632145 | H | 56.379398 | 13.560380 | 69.468689 |
| H | 54.141141 | 12.480424 | 69.159413 | H | 54.161518 | 12.463465 | 69.240931 | H | 54.155645 | 12.172135 | 69.044381 |
| H | 51.136245 | 8.679193  | 66.239399 | H | 51.291967 | 8.687326  | 66.310750 | H | 51.155979 | 8.662832  | 66.159292 |
| H | 49.499702 | 9.364266  | 66.020540 | H | 49.618383 | 9.291443  | 66.129225 | H | 49.525876 | 9.323037  | 65.833925 |
| H | 50.557887 | 9.977456  | 67.318108 | H | 50.666331 | 9.936116  | 67.419496 | H | 50.532097 | 10.024190 | 67.126141 |
| H | 50.681296 | 12.718013 | 64.748961 | H | 50.614708 | 12.740238 | 64.927583 | H | 50.748580 | 12.618701 | 64.435328 |
| H | 50.469053 | 12.398240 | 66.466755 | H | 50.402037 | 12.344010 | 66.630017 | H | 50.497284 | 12.375620 | 66.162332 |
| H | 50.263136 | 10.122604 | 63.253979 | H | 50.274527 | 10.067736 | 63.398982 | H | 50.323319 | 9.868744  | 63.096208 |
| H | 53.710916 | 10.346614 | 59.395111 | H | 53.681932 | 10.247710 | 59.439275 | H | 53.782604 | 9.800378  | 59.195254 |
| H | 56.414943 | 10.562742 | 59.228925 | H | 56.391946 | 10.465313 | 59.250827 | H | 56.493935 | 10.004574 | 59.043772 |
| H | 60.347317 | 11.095632 | 62.687335 | H | 60.312413 | 11.103179 | 62.684534 | H | 60.343188 | 10.953693 | 62.500678 |
| H | 60.485068 | 11.318198 | 65.399183 | H | 60.464453 | 11.316881 | 65.400974 | H | 60.450877 | 11.120259 | 65.219650 |
| H | 55.949135 | 8.487968  | 66.913425 | H | 56.082467 | 8.532353  | 66.983838 | H | 56.818367 | 7.929177  | 67.315417 |
| H | 52.688682 | 12.728112 | 62.329088 | H | 52.695672 | 12.718404 | 62.358446 | H | 52.751670 | 12.714121 | 62.343122 |
| H | 53.085328 | 13.330912 | 64.759476 | H | 53.108074 | 13.419218 | 64.773521 | H | 53.162183 | 13.365806 | 64.748852 |
| H | 53.743004 | 14.888361 | 64.258020 | H | 53.779716 | 14.942830 | 64.198883 | H | 53.740191 | 14.953324 | 64.217719 |
| H | 51.459929 | 8.110298  | 70.522271 | H | 51.601201 | 8.070010  | 70.521965 | H | 51.270340 | 8.019671  | 70.096449 |
| H | 56.297557 | 2.760089  | 65.195020 | H | 56.320296 | 2.766503  | 65.149116 | H | 56.367269 | 1.951924  | 65.152296 |
| H | 57.912343 | 8.060888  | 63.459383 | H | 57.842244 | 8.078815  | 63.449559 | H | 58.352768 | 7.672544  | 63.622582 |
| H | 53.648770 | 8.226946  | 61.147080 | H | 53.288093 | 8.210121  | 61.525126 | H | 53.577917 | 8.043894  | 61.891313 |
| H | 51.847268 | 14.234639 | 62.757559 | H | 51.844659 | 14.228592 | 62.759610 | H | 51.821639 | 14.165590 | 62.783588 |
| H | 53.373264 | 14.288210 | 61.836807 | H | 53.356957 | 14.270786 | 61.815352 | H | 53.310158 | 14.315448 | 61.816092 |
| O | 51.837723 | 7.256250  | 64.050396 | O | 51.754001 | 7.168230  | 64.098476 | O | 52.247171 | 7.198470  | 64.286132 |
| H | 52.737646 | 7.633154  | 64.179269 | H | 52.589245 | 7.653630  | 64.285607 | H | 53.113201 | 7.502638  | 64.632773 |
| H | 51.315887 | 8.086733  | 63.928720 | H | 51.117517 | 7.900801  | 63.976331 | H | 51.795395 | 8.039786  | 64.038850 |
| O | 57.368933 | 8.615719  | 67.653783 | O | 57.514165 | 8.648249  | 67.608102 | O | 58.245564 | 8.466240  | 67.783955 |
| H | 57.750798 | 9.402512  | 67.193979 | H | 57.788885 | 9.536128  | 67.243483 | H | 58.275761 | 9.340610  | 67.311669 |
| H | 57.251444 | 8.938496  | 68.567864 | H | 57.470208 | 8.810307  | 68.568772 | H | 58.238805 | 8.720076  | 68.725446 |
| H | 51.961832 | 1.310000  | 63.815036 | H | 51.980546 | 1.301169  | 63.806901 | H | 51.754224 | 1.386935  | 63.803422 |

Heme (Fe<sup>3+</sup>) with HSO<sub>3</sub><sup>-</sup>

| S=1/2 |           |          | S=3/2     |   |           | S=5/2    |           |   |           |          |           |
|-------|-----------|----------|-----------|---|-----------|----------|-----------|---|-----------|----------|-----------|
| C     | 50.331000 | 4.395000 | 71.629000 | C | 50.331000 | 4.395000 | 71.629000 | C | 50.331000 | 4.395000 | 71.629000 |
| C     | 50.927584 | 5.785741 | 71.393806 | C | 50.915352 | 5.794959 | 71.418345 | C | 50.494724 | 5.669415 | 70.802581 |
| C     | 51.551992 | 5.932944 | 70.006033 | C | 51.552697 | 5.966986 | 70.039175 | C | 51.817988 | 5.682479 | 70.044831 |
| N     | 52.077314 | 7.292402 | 69.834137 | N | 52.060924 | 7.335408 | 69.889870 | N | 51.895765 | 6.864880 | 69.186611 |
| C     | 52.893114 | 7.693965 | 68.857144 | C | 52.880685 | 7.761881 | 68.926829 | C | 52.916363 | 7.148814 | 68.372783 |
| N     | 53.241856 | 6.867781 | 67.865667 | N | 53.252762 | 6.954602 | 67.928387 | N | 53.984191 | 6.337328 | 68.314444 |
| N     | 53.416113 | 8.932988 | 68.873533 | N | 53.381913 | 9.009354 | 68.964103 | N | 52.897815 | 8.244204 | 67.608585 |
| C     | 52.225000 | 2.268000 | 63.346000 | C | 52.225000 | 2.268000 | 63.346000 | C | 52.225000 | 2.268000 | 63.346000 |
| C     | 53.717382 | 2.540364 | 63.506130 | C | 53.714059 | 2.572748 | 63.478184 | C | 53.744608 | 2.172746 | 63.403566 |
| C     | 54.136800 | 2.574074 | 64.984582 | C | 54.175867 | 2.543108 | 64.943762 | C | 54.251208 | 2.037914 | 64.853167 |
| N     | 55.391499 | 3.292424 | 65.209260 | N | 55.434614 | 3.256516 | 65.162844 | N | 55.537228 | 2.691000 | 65.078896 |
| C     | 55.486124 | 4.624156 | 65.095927 | C | 55.522108 | 4.592028 | 65.113245 | C | 55.678345 | 4.023965 | 65.091307 |
| N     | 54.380521 | 5.365180 | 64.966537 | N | 54.410283 | 5.334448 | 65.056905 | N | 54.594630 | 4.813443 | 65.025024 |
| N     | 56.681313 | 5.228823 | 65.109930 | N | 56.715434 | 5.199958 | 65.125036 | N | 56.892216 | 4.577077 | 65.156627 |
| C     | 57.624000 | 3.668000 | 61.733000 | C | 57.624000 | 3.668000 | 61.733000 | C | 57.624000 | 3.668000 | 61.733000 |
| C     | 57.584000 | 4.849000 | 60.729000 | C | 57.584000 | 4.849000 | 60.729000 | C | 57.584000 | 4.849000 | 60.729000 |
| C     | 57.540626 | 6.228594 | 61.405635 | C | 57.524895 | 6.230827 | 61.403745 | C | 57.602451 | 6.217675 | 61.414649 |
| C     | 58.845918 | 6.618328 | 62.088468 | C | 58.835746 | 6.632188 | 62.068962 | C | 58.946329 | 6.563036 | 62.042878 |
| N     | 58.745031 | 7.999408 | 62.661577 | N | 58.731554 | 8.001735 | 62.669008 | N | 58.818828 | 7.824779 | 62.838212 |
| C     | 51.838000 | 3.862000 | 59.049000 | C | 51.838000 | 3.862000 | 59.049000 | C | 51.838000 | 3.862000 | 59.049000 |
| C     | 52.531000 | 4.355000 | 60.326000 | C | 52.531000 | 4.355000 | 60.326000 | C | 52.531000 | 4.355000 | 60.326000 |
| C     | 53.226979 | 5.704409 | 60.170974 | C | 53.139823 | 5.749157 | 60.218621 | C | 53.096832 | 5.779695 | 60.394097 |











|   |           |           |           |   |           |           |           |   |           |           |           |
|---|-----------|-----------|-----------|---|-----------|-----------|-----------|---|-----------|-----------|-----------|
| H | 53.157242 | 6.089763  | 62.288835 | H | 53.144517 | 6.069180  | 62.307647 | H | 53.307476 | 5.771620  | 62.436328 |
| H | 55.095659 | 7.684694  | 60.720607 | H | 55.011587 | 7.746739  | 60.729259 | H | 55.179083 | 7.557071  | 60.993284 |
| H | 54.720303 | 7.769141  | 62.427259 | H | 54.690677 | 7.773164  | 62.444681 | H | 55.048326 | 7.381646  | 62.695023 |
| H | 58.728752 | 11.491160 | 67.245379 | H | 58.789798 | 11.414357 | 67.161955 | H | 59.368740 | 11.314051 | 65.516491 |
| H | 52.332057 | 11.400562 | 67.375896 | H | 52.398574 | 11.540516 | 67.385432 | H | 53.237657 | 10.944258 | 67.364608 |
| H | 52.231875 | 10.172174 | 61.113496 | H | 52.154409 | 10.139413 | 61.170283 | H | 51.513104 | 9.825783  | 61.309284 |
| H | 58.547541 | 10.922206 | 60.850000 | H | 58.491404 | 10.904574 | 60.766383 | H | 57.653645 | 9.768852  | 59.529918 |
| H | 57.813023 | 10.333653 | 69.247062 | H | 57.842533 | 10.327521 | 69.205349 | H | 59.228606 | 10.406716 | 67.751553 |
| H | 56.208000 | 9.559751  | 68.929121 | H | 56.190852 | 9.630028  | 68.948626 | H | 57.782025 | 9.334199  | 67.781045 |
| H | 56.422615 | 10.660994 | 70.307869 | H | 56.502712 | 10.743319 | 70.299186 | H | 58.089585 | 10.481130 | 69.118681 |
| H | 56.676804 | 13.795796 | 68.191640 | H | 56.777817 | 13.830117 | 68.127208 | H | 57.229137 | 13.558215 | 67.030415 |
| H | 56.242395 | 13.272677 | 69.808018 | H | 56.440370 | 13.325309 | 69.772586 | H | 57.594070 | 13.049916 | 68.670684 |
| H | 54.162739 | 11.864733 | 69.125196 | H | 54.245775 | 11.988969 | 69.116533 | H | 55.484299 | 11.409497 | 68.629109 |
| H | 51.129035 | 8.630697  | 65.945080 | H | 51.170331 | 8.716411  | 66.017338 | H | 51.518269 | 8.419666  | 66.202866 |
| H | 49.528768 | 9.384993  | 65.717795 | H | 49.571140 | 9.472789  | 65.788860 | H | 49.987870 | 9.321256  | 66.368749 |
| H | 50.579716 | 9.944815  | 67.039567 | H | 50.622391 | 10.036502 | 67.106206 | H | 51.359259 | 9.733161  | 67.422374 |
| H | 50.837690 | 12.691855 | 64.492043 | H | 50.878055 | 12.789889 | 64.577012 | H | 51.289954 | 12.555972 | 64.950615 |
| H | 50.583181 | 12.369884 | 66.202021 | H | 50.601749 | 12.445420 | 66.280289 | H | 51.297686 | 12.163031 | 66.663228 |
| H | 50.417312 | 10.145953 | 62.950253 | H | 50.411426 | 10.128963 | 63.067546 | H | 50.273237 | 9.889862  | 63.546839 |
| H | 53.963937 | 10.276817 | 59.205579 | H | 53.872624 | 10.223979 | 59.193129 | H | 52.752856 | 9.604348  | 59.003047 |
| H | 56.671459 | 10.519646 | 59.094288 | H | 56.585653 | 10.473223 | 59.030446 | H | 55.371669 | 9.481092  | 58.268430 |
| H | 60.505883 | 11.196024 | 62.625738 | H | 60.458090 | 11.177125 | 62.503103 | H | 59.941046 | 10.244654 | 60.730763 |
| H | 60.583023 | 11.380212 | 65.347848 | H | 60.580629 | 11.310019 | 65.229085 | H | 60.654052 | 10.920001 | 63.282547 |
| H | 52.690889 | 12.731663 | 62.314740 | H | 52.694350 | 12.723528 | 62.339031 | H | 52.604426 | 12.750092 | 62.296651 |
| H | 53.213672 | 13.286296 | 64.729698 | H | 53.278652 | 13.371062 | 64.735730 | H | 53.664012 | 13.143013 | 64.551606 |
| H | 53.821378 | 14.866549 | 64.227369 | H | 53.890794 | 14.916363 | 64.147298 | H | 54.198733 | 14.746639 | 64.018658 |
| H | 51.233992 | 7.393341  | 69.056597 | H | 51.246547 | 7.447445  | 69.135574 | H | 51.658012 | 7.023558  | 68.806613 |
| H | 56.307976 | 2.767880  | 65.081384 | H | 56.320901 | 2.745660  | 65.085251 | H | 56.049959 | 1.970424  | 65.604476 |
| H | 58.007866 | 8.108031  | 63.369410 | H | 57.965804 | 8.105991  | 63.379163 | H | 58.762813 | 7.290745  | 63.696862 |
| H | 53.620381 | 8.202517  | 61.251382 | H | 53.547949 | 8.221238  | 61.335409 | H | 53.782674 | 7.987068  | 61.751399 |
| H | 51.847552 | 14.214547 | 62.823875 | H | 51.848382 | 14.205733 | 62.848638 | H | 51.922043 | 14.201518 | 63.071054 |
| H | 53.317477 | 14.316814 | 61.820094 | H | 53.281161 | 14.304879 | 61.792523 | H | 53.127460 | 14.364148 | 61.766650 |
| O | 52.051343 | 7.332982  | 63.912929 | O | 52.021625 | 7.304887  | 64.001655 | O | 52.735618 | 7.215946  | 64.324317 |
| H | 52.979434 | 7.636922  | 64.059720 | H | 52.947732 | 7.637283  | 64.110543 | H | 53.665768 | 7.517285  | 64.462127 |
| H | 51.601413 | 8.209294  | 63.749799 | H | 51.535992 | 8.143569  | 63.828079 | H | 52.238652 | 8.039851  | 64.118643 |
| O | 56.890454 | 7.190187  | 67.951552 | O | 56.884307 | 7.263588  | 67.988983 | O | 57.353450 | 6.505070  | 68.488465 |
| H | 56.471961 | 7.703855  | 67.193436 | H | 56.455696 | 7.754787  | 67.222843 | H | 57.091696 | 6.991251  | 67.640917 |
| H | 57.331422 | 7.871980  | 68.487877 | H | 57.327990 | 7.963843  | 68.499985 | H | 57.699225 | 7.201891  | 69.072228 |
| H | 52.060914 | 1.247896  | 63.721225 | H | 52.042240 | 1.258661  | 63.740449 | H | 51.717588 | 1.407575  | 63.804762 |

Heme (Fe<sup>3+</sup>) with SO<sub>3</sub><sup>2-</sup>

| S=1/2 |           |          | S=3/2     |   |           | S=5/2    |           |   |           |          |           |
|-------|-----------|----------|-----------|---|-----------|----------|-----------|---|-----------|----------|-----------|
| C     | 50.331000 | 4.395000 | 71.629000 | C | 50.331000 | 4.395000 | 71.629000 | C | 50.331000 | 4.395000 | 71.629000 |
| C     | 50.520900 | 5.631474 | 70.749612 | C | 50.522500 | 5.621000 | 70.735579 | C | 50.630703 | 5.562625 | 70.686235 |
| C     | 51.965098 | 5.771650 | 70.278593 | C | 51.968666 | 5.758661 | 70.270612 | C | 52.040979 | 5.468093 | 70.112556 |
| N     | 52.110303 | 6.933079 | 69.403459 | N | 52.116995 | 6.913236 | 69.387478 | N | 52.320626 | 6.584693 | 69.211067 |
| C     | 53.244160 | 7.263357 | 68.763255 | C | 53.258513 | 7.252929 | 68.766619 | C | 53.514628 | 6.796700 | 68.627245 |
| N     | 54.335838 | 6.503660 | 68.911936 | N | 54.348578 | 6.491589 | 68.917962 | N | 54.519081 | 5.940591 | 68.855029 |
| N     | 53.285227 | 8.350529 | 67.986247 | N | 53.306964 | 8.350317 | 68.004181 | N | 53.696350 | 7.845699 | 67.824499 |
| C     | 52.225000 | 2.268000 | 63.346000 | C | 52.225000 | 2.268000 | 63.346000 | C | 52.225000 | 2.268000 | 63.346000 |
| C     | 53.707645 | 2.591832 | 63.513446 | C | 53.699222 | 2.639272 | 63.486034 | C | 53.732219 | 2.476834 | 63.478175 |
| C     | 54.133704 | 2.604722 | 64.990328 | C | 54.172180 | 2.602539 | 64.947916 | C | 54.214666 | 2.299127 | 64.926274 |
| N     | 55.395499 | 3.309222 | 65.222039 | N | 55.438708 | 3.304845 | 65.161229 | N | 55.546063 | 2.854744 | 65.165669 |
| C     | 55.509213 | 4.641901 | 65.062488 | C | 55.542740 | 4.643476 | 65.060923 | C | 55.789411 | 4.180366 | 65.156202 |
| N     | 54.417402 | 5.397213 | 64.974276 | N | 54.447342 | 5.400055 | 65.053141 | N | 54.777948 | 5.045328 | 65.207353 |
| N     | 56.715470 | 5.216866 | 64.982054 | N | 56.744769 | 5.225438 | 64.966328 | N | 57.044688 | 4.640473 | 65.113892 |
| C     | 57.624000 | 3.668000 | 61.733000 | C | 57.624000 | 3.668000 | 61.733000 | C | 57.624000 | 3.668000 | 61.733000 |
| C     | 57.584000 | 4.849000 | 60.729000 | C | 57.584000 | 4.849000 | 60.729000 | C | 57.584000 | 4.849000 | 60.729000 |
| C     | 57.553369 | 6.238973 | 61.382825 | C | 57.524313 | 6.242323 | 61.376708 | C | 57.658041 | 6.229684 | 61.394270 |

|    |           |           |           |    |           |           |           |    |           |           |           |
|----|-----------|-----------|-----------|----|-----------|-----------|-----------|----|-----------|-----------|-----------|
| C  | 58.872849 | 6.663863  | 62.016843 | C  | 58.846241 | 6.704228  | 61.979380 | C  | 59.061168 | 6.588898  | 61.868733 |
| N  | 58.760561 | 8.056896  | 62.548043 | N  | 58.718905 | 8.098180  | 62.505501 | N  | 59.036838 | 7.894700  | 62.591304 |
| C  | 51.838000 | 3.862000  | 59.049000 | C  | 51.838000 | 3.862000  | 59.049000 | C  | 51.838000 | 3.862000  | 59.049000 |
| C  | 52.531000 | 4.355000  | 60.326000 | C  | 52.531000 | 4.355000  | 60.326000 | C  | 52.531000 | 4.355000  | 60.326000 |
| C  | 53.235892 | 5.692143  | 60.128298 | C  | 53.176797 | 5.724902  | 60.157567 | C  | 53.215345 | 5.719749  | 60.246713 |
| C  | 53.861775 | 6.137852  | 61.430969 | C  | 53.843337 | 6.136428  | 61.452647 | C  | 53.927041 | 5.977107  | 61.567726 |
| N  | 54.461472 | 7.496523  | 61.348221 | N  | 54.365033 | 7.526461  | 61.412486 | N  | 54.464857 | 7.359205  | 61.700926 |
| Fe | 55.448460 | 10.977397 | 64.177943 | Fe | 55.412123 | 11.037968 | 64.131235 | Fe | 55.542636 | 11.192275 | 63.946264 |
| C  | 58.001370 | 11.307560 | 66.403586 | C  | 57.980647 | 11.352304 | 66.370511 | C  | 58.350007 | 11.350110 | 65.971472 |
| C  | 53.137759 | 11.392070 | 66.636040 | C  | 53.131775 | 11.389802 | 66.644760 | C  | 53.530004 | 10.986421 | 66.717327 |
| C  | 52.946444 | 10.297828 | 61.917714 | C  | 52.882746 | 10.275878 | 61.924493 | C  | 52.907502 | 10.202743 | 61.931874 |
| C  | 57.730079 | 10.925801 | 61.588755 | C  | 57.682727 | 10.932919 | 61.539111 | C  | 57.688637 | 10.667384 | 61.208409 |
| N  | 55.582287 | 11.339247 | 66.113756 | N  | 55.558630 | 11.353670 | 66.133389 | N  | 55.921981 | 11.199572 | 66.031484 |
| C  | 56.701258 | 11.424263 | 66.868380 | C  | 56.696621 | 11.446159 | 66.863807 | C  | 57.108349 | 11.296555 | 66.632460 |
| C  | 56.397999 | 11.707772 | 68.333390 | C  | 56.400163 | 11.718166 | 68.338831 | C  | 56.960366 | 11.336155 | 68.145844 |
| C  | 56.795134 | 10.524411 | 69.251893 | C  | 56.817649 | 10.530161 | 69.239337 | C  | 57.658713 | 10.135027 | 68.828862 |
| C  | 56.994967 | 13.056415 | 68.840865 | C  | 56.990115 | 13.067607 | 68.840479 | C  | 57.413566 | 12.698013 | 68.770035 |
| C  | 58.502502 | 13.158644 | 69.212369 | C  | 58.511872 | 13.208647 | 69.134629 | C  | 58.926717 | 13.008102 | 68.953567 |
| O  | 59.281394 | 12.185000 | 68.998405 | O  | 59.280910 | 12.212257 | 69.012442 | O  | 59.802062 | 12.250268 | 68.445877 |
| O  | 58.811484 | 14.271312 | 69.723509 | O  | 58.840704 | 14.372246 | 69.502971 | O  | 59.134056 | 14.054255 | 69.629753 |
| C  | 54.921005 | 11.807005 | 68.272499 | C  | 54.915071 | 11.805832 | 68.292986 | C  | 55.479249 | 11.229757 | 68.267092 |
| C  | 54.489184 | 11.545960 | 66.999822 | C  | 54.478801 | 11.549741 | 67.009967 | C  | 54.913226 | 11.145712 | 67.020430 |
| N  | 53.483837 | 10.777689 | 64.304956 | N  | 53.434764 | 10.789608 | 64.296988 | N  | 53.605974 | 10.678273 | 64.281905 |
| C  | 52.697086 | 10.981260 | 65.417395 | C  | 52.677080 | 10.981093 | 65.422898 | C  | 52.957545 | 10.748798 | 65.499979 |
| C  | 51.214188 | 10.743960 | 65.138403 | C  | 51.191244 | 10.732533 | 65.175905 | C  | 51.444339 | 10.539347 | 65.331716 |
| C  | 50.602228 | 9.685673  | 66.078465 | C  | 50.607104 | 9.675973  | 66.136506 | C  | 50.873959 | 9.461657  | 66.272267 |
| C  | 50.436089 | 12.085556 | 65.277608 | C  | 50.412628 | 12.071309 | 65.334167 | C  | 50.715166 | 11.891716 | 65.586556 |
| C  | 48.920830 | 12.036412 | 64.959619 | C  | 48.888358 | 12.020004 | 65.053237 | C  | 49.178425 | 11.899891 | 65.385062 |
| O  | 48.251199 | 12.986996 | 65.456599 | O  | 48.235391 | 12.984170 | 65.546914 | O  | 48.584416 | 12.867743 | 65.942652 |
| O  | 48.484705 | 11.098527 | 64.231251 | O  | 48.431154 | 11.069661 | 64.355834 | O  | 48.653259 | 10.989156 | 64.682106 |
| C  | 51.283099 | 10.327294 | 63.712697 | C  | 51.232513 | 10.304031 | 63.751454 | C  | 51.382741 | 10.190016 | 63.877959 |
| C  | 52.587686 | 10.420517 | 63.276494 | C  | 52.531589 | 10.416361 | 63.276106 | C  | 52.637892 | 10.337212 | 63.323686 |
| N  | 55.365546 | 10.620317 | 62.194994 | N  | 55.314858 | 10.595574 | 62.161171 | N  | 55.353711 | 10.462011 | 61.959158 |
| C  | 54.212733 | 10.453970 | 61.428179 | C  | 54.159259 | 10.434079 | 61.414843 | C  | 54.136535 | 10.286602 | 61.312794 |
| C  | 54.545094 | 10.417416 | 60.014989 | C  | 54.481058 | 10.377623 | 60.010431 | C  | 54.369048 | 10.121725 | 59.886799 |
| C  | 55.893098 | 10.569961 | 59.929899 | C  | 55.841266 | 10.519246 | 59.906467 | C  | 55.716722 | 10.202555 | 59.692894 |
| C  | 56.392960 | 10.710618 | 61.285417 | C  | 56.351793 | 10.678051 | 61.238669 | C  | 56.322423 | 10.441820 | 60.994786 |
| N  | 57.447838 | 11.090026 | 64.022932 | N  | 57.411885 | 11.152356 | 63.976898 | N  | 57.615852 | 11.074064 | 63.629050 |
| C  | 58.216054 | 11.082674 | 62.879469 | C  | 58.176847 | 11.139925 | 62.819030 | C  | 58.279562 | 10.980950 | 62.436124 |
| C  | 59.621072 | 11.178287 | 63.214125 | C  | 59.573363 | 11.256242 | 63.148310 | C  | 59.711603 | 11.153903 | 62.652781 |
| C  | 59.697668 | 11.221537 | 64.576199 | C  | 59.654099 | 11.312419 | 64.515001 | C  | 59.891467 | 11.317122 | 63.993409 |
| C  | 58.341781 | 11.186492 | 65.072578 | C  | 58.305104 | 11.261468 | 65.020352 | C  | 58.575012 | 11.263637 | 64.611400 |
| S  | 55.648298 | 8.730985  | 64.708313 | S  | 55.679939 | 8.743785  | 64.746441 | S  | 56.337386 | 8.294013  | 64.945135 |
| O  | 56.993752 | 8.024851  | 64.465010 | O  | 57.031009 | 8.059067  | 64.500370 | O  | 57.590252 | 7.396667  | 64.684009 |
| O  | 54.628227 | 7.886797  | 63.885620 | O  | 54.661269 | 7.881089  | 63.950487 | O  | 55.182145 | 7.509407  | 64.206134 |
| O  | 55.318489 | 8.430437  | 66.155738 | O  | 55.367572 | 8.485264  | 66.202259 | O  | 56.038290 | 8.086935  | 66.429051 |
| C  | 52.837000 | 13.766000 | 62.641000 | C  | 52.837000 | 13.766000 | 62.641000 | C  | 52.837000 | 13.766000 | 62.641000 |
| C  | 53.725163 | 13.901123 | 63.876635 | C  | 53.675242 | 13.881922 | 63.913450 | C  | 53.691993 | 13.960339 | 63.888331 |
| S  | 55.419714 | 13.227594 | 63.696719 | S  | 55.357839 | 13.177393 | 63.781636 | S  | 55.438546 | 13.454450 | 63.634773 |
| H  | 54.494510 | 6.391953  | 64.681239 | H  | 54.514882 | 6.396393  | 64.765214 | H  | 54.937645 | 6.043583  | 64.933180 |
| H  | 49.288980 | 4.309850  | 71.959601 | H  | 49.287190 | 4.310780  | 71.953905 | H  | 49.314599 | 4.472945  | 72.032903 |
| H  | 50.965219 | 4.443834  | 72.524751 | H  | 50.959237 | 4.457071  | 72.527940 | H  | 51.029970 | 4.380407  | 72.476254 |
| H  | 50.587556 | 3.476826  | 71.082967 | H  | 50.593631 | 3.470948  | 71.096143 | H  | 50.412707 | 3.432335  | 71.105787 |
| H  | 49.863566 | 5.570281  | 69.869271 | H  | 49.869627 | 5.548689  | 69.853007 | H  | 49.905805 | 5.572942  | 69.858539 |
| H  | 50.234044 | 6.537302  | 71.303775 | H  | 50.231621 | 6.532566  | 71.278013 | H  | 50.524147 | 6.517880  | 71.220574 |
| H  | 52.634009 | 5.877866  | 71.147511 | H  | 52.633152 | 5.871210  | 71.142130 | H  | 52.770875 | 5.481746  | 70.937501 |
| H  | 52.261581 | 4.861237  | 69.732491 | H  | 52.268414 | 4.845164  | 69.732097 | H  | 52.157778 | 4.512566  | 69.574265 |
| H  | 55.267998 | 6.818055  | 68.577752 | H  | 55.283789 | 6.807910  | 68.594077 | H  | 55.501086 | 6.168802  | 68.600880 |

|   |           |           |           |   |           |           |           |   |           |           |           |
|---|-----------|-----------|-----------|---|-----------|-----------|-----------|---|-----------|-----------|-----------|
| H | 54.313928 | 5.736787  | 69.571317 | H | 54.320442 | 5.718277  | 69.569425 | H | 54.377199 | 5.185417  | 69.513259 |
| H | 54.038730 | 8.472394  | 67.285047 | H | 54.069839 | 8.484761  | 67.316898 | H | 54.568158 | 7.969628  | 67.270752 |
| H | 52.439122 | 8.886792  | 67.830817 | H | 52.459872 | 8.882495  | 67.839884 | H | 52.941486 | 8.500256  | 67.652072 |
| H | 51.951567 | 2.207380  | 62.286628 | H | 51.924516 | 2.240328  | 62.292753 | H | 51.907420 | 2.329701  | 62.299478 |
| H | 51.598370 | 3.040587  | 63.812575 | H | 51.584689 | 2.997083  | 63.860732 | H | 51.670712 | 3.028638  | 63.912913 |
| H | 53.914819 | 3.578477  | 63.075691 | H | 53.858226 | 3.650749  | 63.087061 | H | 53.991215 | 3.490143  | 63.140819 |
| H | 54.331436 | 1.870892  | 62.967018 | H | 54.331071 | 1.965954  | 62.890404 | H | 54.282694 | 1.781163  | 62.829554 |
| H | 54.260324 | 1.585652  | 65.370459 | H | 54.316362 | 1.571163  | 65.286630 | H | 54.256128 | 1.238520  | 65.196018 |
| H | 53.351698 | 3.062397  | 65.615378 | H | 53.409856 | 3.033709  | 65.614528 | H | 53.503132 | 2.758548  | 65.629574 |
| H | 53.496797 | 4.982802  | 65.024037 | H | 53.529970 | 4.976564  | 65.089068 | H | 53.825911 | 4.707918  | 65.248125 |
| H | 57.547148 | 4.659886  | 65.127170 | H | 57.582189 | 4.664249  | 65.043450 | H | 57.812265 | 3.992380  | 64.998037 |
| H | 56.814445 | 6.246602  | 64.924450 | H | 56.842565 | 6.254810  | 64.934180 | H | 57.242760 | 5.659240  | 65.046476 |
| H | 57.618455 | 2.710566  | 61.198859 | H | 57.648403 | 2.711090  | 61.198463 | H | 57.579725 | 2.709089  | 61.202810 |
| H | 56.748601 | 3.692911  | 62.396402 | H | 56.732613 | 3.675931  | 62.375385 | H | 56.769225 | 3.716529  | 62.420558 |
| H | 58.524388 | 3.697541  | 62.360446 | H | 58.509229 | 3.713726  | 62.380978 | H | 58.542321 | 3.676612  | 62.334498 |
| H | 58.444101 | 4.788119  | 60.046573 | H | 58.454411 | 4.798512  | 60.058767 | H | 58.401461 | 4.747772  | 60.000073 |
| H | 56.688583 | 4.746716  | 60.099740 | H | 56.699705 | 4.732496  | 60.086718 | H | 56.652662 | 4.787033  | 60.148264 |
| H | 56.772408 | 6.272005  | 62.158392 | H | 56.756429 | 6.258539  | 62.165973 | H | 56.978876 | 6.265886  | 62.260409 |
| H | 57.300406 | 6.986138  | 60.612417 | H | 57.232473 | 6.977039  | 60.608743 | H | 57.333291 | 7.002459  | 60.678653 |
| H | 59.688888 | 6.638970  | 61.286505 | H | 59.645128 | 6.693241  | 61.229900 | H | 59.756434 | 6.663449  | 61.025342 |
| H | 59.144249 | 6.022246  | 62.861772 | H | 59.153613 | 6.073905  | 62.820656 | H | 59.450171 | 5.846087  | 62.573702 |
| H | 58.498986 | 8.740765  | 61.819562 | H | 58.411097 | 8.772392  | 61.784882 | H | 58.626589 | 8.647539  | 62.013721 |
| H | 59.640617 | 8.391272  | 62.955147 | H | 59.605438 | 8.458658  | 62.875031 | H | 59.974615 | 8.204657  | 62.862246 |
| H | 51.338536 | 2.899131  | 59.214882 | H | 51.378853 | 2.877166  | 59.202124 | H | 51.374433 | 2.882232  | 59.218410 |
| H | 52.563044 | 3.730578  | 58.233951 | H | 52.555100 | 3.775654  | 58.221072 | H | 52.553634 | 3.760327  | 58.221487 |
| H | 51.079542 | 4.581969  | 58.712707 | H | 51.047109 | 4.558202  | 58.738416 | H | 51.050154 | 4.557728  | 58.729097 |
| H | 53.263615 | 3.604018  | 60.659869 | H | 53.299108 | 3.626234  | 60.628654 | H | 53.282562 | 3.606797  | 60.626702 |
| H | 51.792220 | 4.454993  | 61.134920 | H | 51.802694 | 4.402664  | 61.148916 | H | 51.796182 | 4.390116  | 61.144253 |
| H | 52.508898 | 6.449643  | 59.796336 | H | 52.409424 | 6.467794  | 59.890440 | H | 52.468243 | 6.508095  | 60.067491 |
| H | 54.000091 | 5.610150  | 59.339664 | H | 53.909842 | 5.706768  | 59.336141 | H | 53.931849 | 5.752277  | 59.411643 |
| H | 54.655845 | 5.453330  | 61.755516 | H | 54.684036 | 5.476475  | 61.701655 | H | 54.769313 | 5.287192  | 61.704570 |
| H | 53.110355 | 6.194315  | 62.228750 | H | 53.128043 | 6.115963  | 62.284532 | H | 53.239363 | 5.856282  | 62.413240 |
| H | 55.268059 | 7.542777  | 60.719590 | H | 55.106048 | 7.668474  | 60.719606 | H | 55.145391 | 7.592476  | 60.969770 |
| H | 54.719799 | 7.801111  | 62.356103 | H | 54.691731 | 7.797220  | 62.403332 | H | 54.904624 | 7.501124  | 62.685924 |
| H | 58.789520 | 11.410891 | 67.151285 | H | 58.786737 | 11.454196 | 67.096816 | H | 59.208960 | 11.493646 | 66.630654 |
| H | 52.402980 | 11.573060 | 67.418702 | H | 52.397157 | 11.560607 | 67.429905 | H | 52.861980 | 11.030943 | 67.577021 |
| H | 52.134014 | 10.144640 | 61.208368 | H | 52.067340 | 10.124264 | 61.218262 | H | 52.039430 | 10.038962 | 61.293605 |
| H | 58.436250 | 10.995045 | 60.762047 | H | 58.384546 | 10.992227 | 60.707096 | H | 58.337562 | 10.643360 | 60.333700 |
| H | 57.876467 | 10.363163 | 69.202454 | H | 57.899315 | 10.376171 | 69.173401 | H | 58.741703 | 10.212025 | 68.696628 |
| H | 56.242816 | 9.624395  | 68.953994 | H | 56.266593 | 9.630584  | 68.938134 | H | 57.282782 | 9.203951  | 68.391066 |
| H | 56.526572 | 10.762982 | 70.289128 | H | 56.561342 | 10.755381 | 70.283108 | H | 57.430446 | 10.147173 | 69.902284 |
| H | 56.789326 | 13.837146 | 68.094983 | H | 56.723031 | 13.857420 | 68.124671 | H | 56.983258 | 13.520036 | 68.180318 |
| H | 56.436710 | 13.344139 | 69.743238 | H | 56.474723 | 13.324224 | 69.778556 | H | 56.956822 | 12.766636 | 69.766830 |
| H | 54.278126 | 12.001025 | 69.126605 | H | 54.275449 | 11.975417 | 69.154355 | H | 54.944401 | 11.217375 | 69.212614 |
| H | 51.157715 | 8.740720  | 66.020861 | H | 51.165888 | 8.733556  | 66.069964 | H | 51.388093 | 8.502159  | 66.130761 |
| H | 49.561579 | 9.503709  | 65.788578 | H | 49.562138 | 9.487013  | 65.867759 | H | 49.807649 | 9.324764  | 66.061773 |
| H | 50.608415 | 10.055560 | 67.114304 | H | 50.630171 | 10.049170 | 67.171044 | H | 50.975839 | 9.784821  | 67.318646 |
| H | 50.886222 | 12.831958 | 64.606973 | H | 50.841086 | 12.819168 | 64.650847 | H | 51.133240 | 12.656902 | 64.916191 |
| H | 50.568507 | 12.465779 | 66.299877 | H | 50.564663 | 12.455367 | 66.352197 | H | 50.940440 | 12.220479 | 66.611123 |
| H | 50.409215 | 10.142324 | 63.096655 | H | 50.346769 | 10.109228 | 63.156049 | H | 50.455802 | 10.006346 | 63.345390 |
| H | 53.818889 | 10.306974 | 59.214953 | H | 53.750085 | 10.257775 | 59.215826 | H | 53.590555 | 9.969282  | 59.144807 |
| H | 56.515189 | 10.615666 | 59.040658 | H | 56.450487 | 10.548624 | 59.007646 | H | 56.263598 | 10.139092 | 58.756635 |
| H | 60.426724 | 11.217674 | 62.486331 | H | 60.378193 | 11.290100 | 62.419138 | H | 60.464273 | 11.138516 | 61.869323 |
| H | 60.576930 | 11.305671 | 65.207270 | H | 60.536225 | 11.408601 | 65.140486 | H | 60.818614 | 11.471990 | 64.536633 |
| H | 52.686057 | 12.718211 | 62.369291 | H | 52.676698 | 12.721634 | 62.360335 | H | 52.839795 | 12.718007 | 62.322698 |
| H | 53.254898 | 13.440350 | 64.754200 | H | 53.174974 | 13.414170 | 64.769077 | H | 53.295483 | 13.381073 | 64.731005 |
| H | 53.870871 | 14.963481 | 64.121107 | H | 53.844134 | 14.936772 | 64.170577 | H | 53.710560 | 15.016022 | 64.188349 |
| H | 51.279501 | 7.478484  | 69.200110 | H | 51.294447 | 7.477854  | 69.203848 | H | 51.543933 | 7.171614  | 68.925785 |

|   |           |           |           |   |           |           |           |   |           |           |           |
|---|-----------|-----------|-----------|---|-----------|-----------|-----------|---|-----------|-----------|-----------|
| H | 56.250395 | 2.766051  | 65.258070 | H | 56.296312 | 2.764804  | 65.142723 | H | 56.342700 | 2.229185  | 65.134302 |
| H | 57.999394 | 8.125505  | 63.319955 | H | 57.991268 | 8.155448  | 63.305583 | H | 58.423007 | 7.785418  | 63.499953 |
| H | 53.780377 | 8.194211  | 61.019097 | H | 53.619485 | 8.209208  | 61.201465 | H | 53.712634 | 8.063663  | 61.633413 |
| H | 51.850294 | 14.219536 | 62.822710 | H | 51.855849 | 14.236342 | 62.798061 | H | 51.795770 | 14.060161 | 62.841268 |
| H | 53.294126 | 14.273190 | 61.780530 | H | 53.329615 | 14.273401 | 61.801185 | H | 53.213967 | 14.375429 | 61.808656 |
| O | 51.990168 | 7.246946  | 63.998840 | O | 52.009697 | 7.278804  | 64.029438 | O | 52.482281 | 7.237884  | 64.200389 |
| H | 52.881544 | 7.670575  | 64.063466 | H | 52.910061 | 7.678252  | 64.108854 | H | 53.407854 | 7.540091  | 64.374681 |
| H | 51.406171 | 8.007246  | 63.809681 | H | 51.449483 | 8.062972  | 63.855009 | H | 52.000816 | 8.069432  | 64.005427 |
| O | 56.874406 | 7.248563  | 67.912574 | O | 56.897664 | 7.242298  | 67.948939 | O | 57.187695 | 6.464518  | 68.141389 |
| H | 56.448223 | 7.754730  | 67.160114 | H | 56.487718 | 7.769478  | 67.203725 | H | 56.904957 | 7.094637  | 67.410604 |
| H | 57.357504 | 7.922067  | 68.422701 | H | 57.382326 | 7.900073  | 68.477986 | H | 57.660201 | 7.021266  | 68.783946 |
| H | 51.971828 | 1.305205  | 63.811021 | H | 52.020285 | 1.278286  | 63.776723 | H | 51.924786 | 1.281700  | 63.726654 |

Heme (Fe<sup>2+</sup>) with NO<sub>2</sub><sup>-</sup>

| S=0 |           |            | S=1       |    |           | S=2        |           |    |           |            |           |
|-----|-----------|------------|-----------|----|-----------|------------|-----------|----|-----------|------------|-----------|
| C   | 50.331000 | -52.045950 | 49.409000 | C  | 50.331000 | -52.045950 | 49.409000 | C  | 50.331000 | -52.045950 | 49.409000 |
| C   | 50.396822 | -50.546323 | 49.708313 | C  | 50.426392 | -50.562574 | 49.768531 | C  | 50.482448 | -50.589933 | 49.849349 |
| C   | 51.806887 | -49.981802 | 49.543993 | C  | 51.841260 | -50.013926 | 49.596134 | C  | 51.896327 | -50.060605 | 49.621234 |
| N   | 51.801071 | -48.536930 | 49.780645 | N  | 51.862326 | -48.582401 | 49.900560 | N  | 51.965281 | -48.647650 | 49.994420 |
| C   | 52.843383 | -47.718037 | 49.580179 | C  | 52.892017 | -47.758004 | 49.667220 | C  | 52.991672 | -47.826986 | 49.730296 |
| N   | 54.014659 | -48.214545 | 49.150403 | N  | 54.028104 | -48.231592 | 49.133588 | N  | 54.082351 | -48.290476 | 49.099551 |
| N   | 52.710652 | -46.407063 | 49.781148 | N  | 52.788188 | -46.460040 | 49.963274 | N  | 52.937315 | -46.543926 | 50.093394 |
| C   | 52.225000 | -47.068010 | 42.455410 | C  | 52.225000 | -47.068010 | 42.455410 | C  | 52.225000 | -47.068010 | 42.455410 |
| C   | 53.686155 | -46.947262 | 42.879566 | C  | 53.697825 | -46.920697 | 42.827988 | C  | 53.704341 | -46.913329 | 42.800063 |
| C   | 54.073488 | -48.069018 | 43.848485 | C  | 54.141688 | -48.040348 | 43.776280 | C  | 54.171833 | -48.029587 | 43.742101 |
| N   | 55.347014 | -47.850297 | 44.530194 | N  | 55.405831 | -47.774577 | 44.458860 | N  | 55.428612 | -47.741697 | 44.427193 |
| C   | 55.499858 | -47.016785 | 45.570613 | C  | 55.520578 | -46.960135 | 45.518910 | C  | 55.522789 | -46.951706 | 45.509970 |
| N   | 54.458329 | -46.337658 | 46.047829 | N  | 54.446481 | -46.337664 | 46.004830 | N  | 54.435126 | -46.381012 | 46.023296 |
| N   | 56.719281 | -46.830212 | 46.112644 | N  | 56.727147 | -46.733251 | 46.071971 | N  | 56.727851 | -46.702699 | 46.059264 |
| C   | 57.624000 | -44.932480 | 42.491060 | C  | 57.624000 | -44.932480 | 42.491060 | C  | 57.624000 | -44.932480 | 42.491060 |
| C   | 57.584000 | -43.404240 | 42.750400 | C  | 57.584000 | -43.404240 | 42.750400 | C  | 57.584000 | -43.404240 | 42.750400 |
| C   | 57.414317 | -43.052232 | 44.233883 | C  | 57.351971 | -43.047733 | 44.225719 | C  | 57.245249 | -43.032875 | 44.201541 |
| C   | 58.582499 | -43.463817 | 45.121559 | C  | 58.494640 | -43.418847 | 45.163540 | C  | 58.309473 | -43.409600 | 45.227464 |
| N   | 58.348254 | -42.965781 | 46.512029 | N  | 58.207157 | -42.886623 | 46.530640 | N  | 57.939270 | -42.853927 | 46.564270 |
| C   | 51.838000 | -42.751710 | 40.914430 | C  | 51.838000 | -42.751710 | 40.914430 | C  | 51.838000 | -42.751710 | 40.914430 |
| C   | 52.531000 | -43.413060 | 42.112930 | C  | 52.531000 | -43.413060 | 42.112930 | C  | 52.531000 | -43.413060 | 42.112930 |
| C   | 52.751000 | -42.494798 | 43.313259 | C  | 52.682939 | -42.511898 | 43.335672 | C  | 52.453819 | -42.630319 | 43.418778 |
| C   | 53.926473 | -43.028125 | 44.111809 | C  | 53.852001 | -43.021509 | 44.156153 | C  | 53.568679 | -43.122500 | 44.320351 |
| N   | 53.988083 | -42.465097 | 45.478608 | N  | 53.878646 | -42.457589 | 45.523285 | N  | 53.467669 | -42.635901 | 45.707715 |
| Fe  | 55.035838 | -42.249055 | 49.423530 | Fe | 54.964300 | -42.294884 | 49.500603 | Fe | 54.864652 | -42.280177 | 49.727043 |
| C   | 57.428697 | -44.067640 | 50.975502 | C  | 57.424582 | -44.214944 | 50.846678 | C  | 57.463248 | -44.203035 | 50.847963 |
| C   | 52.571437 | -43.688021 | 51.312651 | C  | 52.642810 | -43.725506 | 51.539705 | C  | 52.710478 | -43.871466 | 51.787232 |
| C   | 52.655283 | -40.584206 | 47.587608 | C  | 52.505499 | -40.750078 | 47.705951 | C  | 52.278447 | -40.943208 | 47.932421 |
| C   | 57.473239 | -40.253696 | 47.998347 | C  | 57.311569 | -40.201553 | 48.104173 | C  | 57.056871 | -40.116630 | 48.244713 |
| N   | 55.031299 | -43.603907 | 50.888256 | N  | 55.047199 | -43.696748 | 50.947160 | N  | 55.079386 | -43.779342 | 51.076112 |
| C   | 56.108548 | -44.241025 | 51.388728 | C  | 56.147155 | -44.378823 | 51.353503 | C  | 56.216830 | -44.433819 | 51.405279 |
| C   | 55.756145 | -45.135448 | 52.571635 | C  | 55.838946 | -45.297218 | 52.540370 | C  | 55.994884 | -45.391153 | 52.581876 |
| C   | 56.057799 | -46.630349 | 52.313706 | C  | 56.028452 | -46.798721 | 52.224826 | C  | 56.189609 | -46.878064 | 52.206777 |
| C   | 56.428952 | -44.646844 | 53.894901 | C  | 56.622907 | -44.883108 | 53.823335 | C  | 56.851568 | -44.997589 | 53.821889 |
| C   | 57.926104 | -44.946685 | 54.190182 | C  | 58.129670 | -45.242333 | 53.976964 | C  | 58.377499 | -45.302600 | 53.863604 |
| O   | 58.660522 | -45.482330 | 53.307274 | O  | 58.743463 | -45.841632 | 53.046441 | O  | 58.937675 | -45.899617 | 52.898149 |
| O   | 58.284222 | -44.607018 | 55.353083 | O  | 58.614270 | -44.884834 | 55.087273 | O  | 58.934051 | -44.911650 | 54.928046 |
| C   | 54.289219 | -44.895528 | 52.639556 | C  | 54.394951 | -44.990087 | 52.733251 | C  | 54.555981 | -45.117189 | 52.867931 |
| C   | 53.901895 | -44.036280 | 51.644800 | C  | 53.980130 | -44.088035 | 51.772484 | C  | 54.067060 | -44.210090 | 51.953102 |
| N   | 53.024747 | -42.222112 | 49.413474 | N  | 52.977568 | -42.323838 | 49.574417 | N  | 52.900892 | -42.454287 | 49.804867 |
| C   | 52.193928 | -42.916533 | 50.255326 | C  | 52.197218 | -42.997941 | 50.465873 | C  | 52.190422 | -43.161663 | 50.736362 |
| C   | 50.713102 | -42.714177 | 49.889415 | C  | 50.708947 | -42.851475 | 50.158071 | C  | 50.683964 | -43.088450 | 50.487067 |
| C   | 49.993616 | -44.055257 | 49.647349 | C  | 50.020782 | -44.219462 | 49.970507 | C  | 50.047560 | -44.487361 | 50.349141 |
| C   | 50.000240 | -41.933968 | 51.025524 | C  | 50.017148 | -42.064204 | 51.307256 | C  | 49.999070 | -42.312754 | 51.648925 |

|   |           |            |           |   |           |            |           |   |           |            |           |
|---|-----------|------------|-----------|---|-----------|------------|-----------|---|-----------|------------|-----------|
| C | 48.499311 | -41.612795 | 50.819532 | C | 48.504206 | -41.773808 | 51.126851 | C | 48.468433 | -42.089434 | 51.524757 |
| O | 47.867059 | -41.338247 | 51.881908 | O | 47.896976 | -41.488143 | 52.198895 | O | 47.899484 | -41.779728 | 52.610879 |
| O | 48.030991 | -41.621393 | 49.643797 | O | 48.012544 | -41.817733 | 49.962659 | O | 47.927835 | -42.203362 | 50.387571 |
| C | 50.854537 | -41.858439 | 48.666832 | C | 50.776533 | -42.034951 | 48.912421 | C | 50.664430 | -42.292657 | 49.226908 |
| C | 52.192251 | -41.549560 | 48.511396 | C | 52.099054 | -41.684588 | 48.671286 | C | 51.955836 | -41.880492 | 48.925997 |
| N | 55.069195 | -40.775102 | 48.044284 | N | 54.926487 | -40.820689 | 48.133500 | N | 54.702909 | -40.854724 | 48.336563 |
| C | 53.959199 | -40.202078 | 47.421596 | C | 53.803699 | -40.305388 | 47.518979 | C | 53.545611 | -40.423765 | 47.719896 |
| C | 54.385417 | -39.137076 | 46.530517 | C | 54.176033 | -39.220625 | 46.636709 | C | 53.842666 | -39.325772 | 46.832093 |
| C | 55.738522 | -39.053318 | 46.641233 | C | 55.530128 | -39.054540 | 46.766439 | C | 55.184616 | -39.068991 | 46.953942 |
| C | 56.152438 | -40.069195 | 47.594326 | C | 55.989826 | -40.048027 | 47.703329 | C | 55.716368 | -40.024668 | 47.887467 |
| N | 57.051883 | -42.173357 | 49.461620 | N | 56.966980 | -42.220843 | 49.463769 | N | 56.859688 | -42.162440 | 49.592187 |
| C | 57.881285 | -41.246312 | 48.879956 | C | 57.770908 | -41.227544 | 48.920835 | C | 57.596848 | -41.134483 | 49.020571 |
| C | 59.264969 | -41.548049 | 49.203130 | C | 59.154120 | -41.532601 | 49.171355 | C | 59.002491 | -41.404328 | 49.173551 |
| C | 59.252970 | -42.687649 | 49.955006 | C | 59.182629 | -42.739287 | 49.830871 | C | 59.108817 | -42.627165 | 49.791395 |
| C | 57.863190 | -43.055934 | 50.137471 | C | 57.812802 | -43.137050 | 50.039385 | C | 57.766519 | -43.075198 | 50.075350 |
| N | 55.103129 | -43.569421 | 48.167302 | N | 54.985570 | -43.607112 | 48.211478 | N | 54.987257 | -43.728199 | 48.313606 |
| O | 55.842477 | -43.593662 | 47.081806 | O | 55.724970 | -43.626714 | 47.131384 | O | 55.493230 | -43.529233 | 47.088343 |
| O | 54.378795 | -44.693679 | 48.265143 | O | 54.226540 | -44.712539 | 48.276967 | O | 54.237535 | -44.877437 | 48.333642 |
| C | 52.817850 | -39.154270 | 50.828390 | C | 52.817850 | -39.154270 | 50.828390 | C | 52.817850 | -39.154270 | 50.828390 |
| C | 53.561059 | -40.165437 | 51.697435 | C | 53.534720 | -40.139228 | 51.748155 | C | 53.388720 | -40.136125 | 51.846632 |
| S | 55.210519 | -40.601629 | 51.035260 | S | 55.172709 | -40.679915 | 51.131776 | S | 55.000935 | -40.866981 | 51.398113 |
| H | 54.550444 | -45.658966 | 46.837255 | H | 54.502218 | -45.677222 | 46.807281 | H | 54.471937 | -45.741857 | 46.853850 |
| H | 49.308753 | -52.419889 | 49.539555 | H | 49.306214 | -52.410876 | 49.545538 | H | 49.308535 | -52.399503 | 49.586869 |
| H | 50.986559 | -52.615170 | 50.082033 | H | 50.991691 | -52.652279 | 50.043416 | H | 51.015025 | -52.702650 | 49.963391 |
| H | 50.639461 | -52.257750 | 48.376096 | H | 50.614669 | -52.219239 | 48.361875 | H | 50.546149 | -52.160633 | 48.337872 |
| H | 49.718636 | -50.001548 | 49.034285 | H | 49.743205 | -49.979499 | 49.133063 | H | 49.776226 | -49.956091 | 49.292579 |
| H | 50.053331 | -50.352075 | 50.735223 | H | 50.108762 | -50.407133 | 50.810301 | H | 50.232326 | -50.490515 | 50.915880 |
| H | 52.494423 | -50.472500 | 50.250960 | H | 52.539824 | -50.548028 | 50.259136 | H | 52.620761 | -50.640407 | 50.214167 |
| H | 52.168363 | -50.181379 | 48.522620 | H | 52.171865 | -50.167702 | 48.556772 | H | 52.161192 | -50.169692 | 48.557430 |
| H | 54.864681 | -47.634486 | 49.174031 | H | 54.879790 | -47.651811 | 49.135461 | H | 54.945709 | -47.729285 | 49.098597 |
| H | 54.144076 | -49.218033 | 49.128356 | H | 54.151998 | -49.232683 | 49.050776 | H | 54.173330 | -49.284604 | 48.934670 |
| H | 53.438973 | -45.729988 | 49.530962 | H | 53.444912 | -45.760604 | 49.593194 | H | 53.542928 | -45.832937 | 49.642228 |
| H | 51.858743 | -46.010562 | 50.162857 | H | 51.927329 | -46.089992 | 50.349971 | H | 52.116343 | -46.187117 | 50.569061 |
| H | 51.965546 | -46.308990 | 41.708596 | H | 51.932138 | -46.336563 | 41.694323 | H | 51.917923 | -46.361498 | 41.676688 |
| H | 51.550765 | -46.943060 | 43.315075 | H | 51.578485 | -46.924725 | 43.332097 | H | 51.592777 | -46.899814 | 43.337942 |
| H | 53.854525 | -45.974346 | 43.362127 | H | 53.864482 | -45.948251 | 43.311513 | H | 53.878580 | -45.940160 | 43.279055 |
| H | 54.352525 | -46.980906 | 42.006240 | H | 54.333677 | -46.933461 | 41.932209 | H | 54.322851 | -46.925005 | 41.892136 |
| H | 54.154699 | -49.023242 | 43.317095 | H | 54.266450 | -48.980173 | 43.228249 | H | 54.315314 | -48.964061 | 43.188883 |
| H | 53.285484 | -48.211945 | 44.605232 | H | 53.363839 | -48.234121 | 44.532093 | H | 53.397888 | -48.244307 | 44.496236 |
| H | 53.526651 | -46.536764 | 45.707301 | H | 53.525353 | -46.578739 | 45.662949 | H | 53.521389 | -46.641099 | 45.675556 |
| H | 57.461103 | -47.454136 | 45.814997 | H | 57.495551 | -47.320205 | 45.766544 | H | 57.507974 | -47.261978 | 45.732372 |
| H | 56.753430 | -46.542724 | 47.104572 | H | 56.738383 | -46.470381 | 47.073345 | H | 56.740090 | -46.472256 | 47.071191 |
| H | 57.670745 | -45.143952 | 41.416012 | H | 57.730661 | -45.143173 | 41.420072 | H | 57.809142 | -45.143142 | 41.430641 |
| H | 56.722941 | -45.416481 | 42.894365 | H | 56.696255 | -45.407566 | 42.840730 | H | 56.666540 | -45.396033 | 42.768717 |
| H | 58.498223 | -45.400341 | 42.961782 | H | 58.464976 | -45.409161 | 43.011305 | H | 58.416851 | -45.420606 | 43.073162 |
| H | 58.497906 | -42.933497 | 42.359682 | H | 58.516751 | -42.938812 | 42.399865 | H | 58.547440 | -42.953296 | 42.469494 |
| H | 56.746549 | -42.963830 | 42.191453 | H | 56.773480 | -42.959081 | 42.156573 | H | 56.826215 | -42.950395 | 42.096545 |
| H | 56.517586 | -43.554346 | 44.622891 | H | 56.452202 | -43.566810 | 44.585406 | H | 56.309018 | -43.527908 | 44.496268 |
| H | 57.253905 | -41.967697 | 44.338012 | H | 57.162823 | -41.966315 | 44.312888 | H | 57.068647 | -41.947658 | 44.262582 |
| H | 59.532402 | -43.046522 | 44.769642 | H | 59.449079 | -42.994699 | 44.832549 | H | 59.294451 | -43.014364 | 44.951953 |
| H | 58.678111 | -44.552634 | 45.185121 | H | 58.605219 | -44.503840 | 45.259299 | H | 58.386789 | -44.495664 | 45.345598 |
| H | 58.344168 | -41.934748 | 46.556298 | H | 58.167704 | -41.856591 | 46.541452 | H | 57.918680 | -41.825827 | 46.553432 |
| H | 59.065200 | -43.276872 | 47.178312 | H | 58.917911 | -43.143144 | 47.230749 | H | 58.607518 | -43.108872 | 47.304960 |
| H | 51.698480 | -43.468859 | 40.095591 | H | 51.745870 | -43.453308 | 40.075586 | H | 51.919760 | -43.378964 | 40.017463 |
| H | 52.435935 | -41.912467 | 40.533594 | H | 52.409279 | -41.879778 | 40.567530 | H | 52.291405 | -41.776586 | 40.689393 |
| H | 50.849352 | -42.360171 | 41.191379 | H | 50.828243 | -42.407323 | 41.177959 | H | 50.769760 | -42.586257 | 41.113270 |
| H | 53.507175 | -43.797758 | 41.773889 | H | 53.530202 | -43.748585 | 41.789054 | H | 53.591405 | -43.569766 | 41.854244 |
| H | 51.957760 | -44.288993 | 42.443753 | H | 51.987157 | -44.318968 | 42.410165 | H | 52.109155 | -44.411765 | 42.279689 |

|   |           |            |           |   |           |            |           |   |           |            |           |
|---|-----------|------------|-----------|---|-----------|------------|-----------|---|-----------|------------|-----------|
| H | 51.846427 | -42.456160 | 43.937423 | H | 51.760253 | -42.515540 | 43.933698 | H | 51.474500 | -42.771221 | 43.898829 |
| H | 52.967021 | -41.465695 | 42.989851 | H | 52.873066 | -41.470435 | 43.036964 | H | 52.577436 | -41.551401 | 43.239471 |
| H | 54.864797 | -42.807410 | 43.595136 | H | 54.794769 | -42.779465 | 43.657562 | H | 54.535593 | -42.805895 | 43.915660 |
| H | 53.855196 | -44.116378 | 44.237147 | H | 53.801513 | -44.111068 | 44.279207 | H | 53.574848 | -44.218603 | 44.377123 |
| H | 53.939852 | -41.439073 | 45.499953 | H | 53.846764 | -41.428825 | 45.547448 | H | 53.335040 | -41.620590 | 45.772854 |
| H | 54.849620 | -42.774321 | 46.007520 | H | 54.723843 | -42.774303 | 46.069539 | H | 54.358308 | -42.903374 | 46.266185 |
| H | 58.171913 | -44.658178 | 51.517083 | H | 58.203719 | -44.823378 | 51.308895 | H | 58.286140 | -44.800985 | 51.242008 |
| H | 51.791908 | -44.124194 | 51.935805 | H | 51.901442 | -44.134359 | 52.224182 | H | 52.012463 | -44.310635 | 52.498395 |
| H | 51.897856 | -40.069134 | 46.997848 | H | 51.717908 | -40.275802 | 47.122291 | H | 51.451501 | -40.522912 | 47.362354 |
| H | 58.226882 | -39.574541 | 47.602292 | H | 58.041083 | -39.485493 | 47.726260 | H | 57.738952 | -39.370872 | 47.837313 |
| H | 57.133045 | -46.783820 | 52.174726 | H | 57.079302 | -46.999902 | 51.994750 | H | 57.230815 | -47.054157 | 51.918425 |
| H | 55.500561 | -46.990718 | 51.440328 | H | 55.387350 | -47.100306 | 51.388555 | H | 55.511507 | -47.160351 | 51.393563 |
| H | 55.738795 | -47.215390 | 53.186605 | H | 55.747376 | -47.392131 | 53.105204 | H | 55.962246 | -47.503730 | 53.080445 |
| H | 56.294350 | -43.558330 | 53.974671 | H | 56.532701 | -43.795804 | 53.956066 | H | 56.730629 | -43.921083 | 54.006651 |
| H | 55.858428 | -45.081090 | 54.728420 | H | 56.111262 | -45.337049 | 54.684886 | H | 56.416573 | -45.504144 | 54.696679 |
| H | 53.623286 | -45.370568 | 53.354749 | H | 53.756710 | -45.458524 | 53.477350 | H | 53.973386 | -45.617237 | 53.636553 |
| H | 50.498631 | -44.645395 | 48.870855 | H | 50.508525 | -44.803331 | 49.177725 | H | 50.522031 | -45.061696 | 49.541754 |
| H | 48.962681 | -43.863255 | 49.329572 | H | 48.974045 | -44.057584 | 49.691448 | H | 48.983314 | -44.372657 | 50.117424 |
| H | 49.965027 | -44.641632 | 50.578496 | H | 50.042714 | -44.792248 | 50.909237 | H | 50.138101 | -45.045112 | 51.292444 |
| H | 50.520502 | -40.976918 | 51.178415 | H | 50.521874 | -41.094625 | 51.430812 | H | 50.462533 | -41.318956 | 51.738981 |
| H | 50.111725 | -42.497456 | 51.963649 | H | 50.155392 | -42.609901 | 52.250903 | H | 50.197266 | -42.836016 | 52.594668 |
| H | 50.021852 | -41.373685 | 48.169493 | H | 49.903314 | -41.632991 | 48.410418 | H | 49.753992 | -41.952722 | 48.745560 |
| H | 53.711239 | -38.528778 | 45.934991 | H | 53.475908 | -38.640526 | 46.042281 | H | 53.105315 | -38.800052 | 46.232139 |
| H | 56.416096 | -38.360583 | 46.150586 | H | 56.168865 | -38.319126 | 46.285522 | H | 55.770642 | -38.299012 | 46.460346 |
| H | 60.116982 | -40.953100 | 48.886599 | H | 59.990418 | -40.909929 | 48.865809 | H | 59.799186 | -40.752239 | 48.826704 |
| H | 60.090701 | -43.217806 | 50.397870 | H | 60.043915 | -43.284128 | 50.205851 | H | 60.008301 | -43.159318 | 50.086318 |
| H | 52.660529 | -39.538055 | 49.818193 | H | 52.612243 | -39.595674 | 49.850817 | H | 52.566650 | -39.647853 | 49.889293 |
| H | 52.976240 | -41.083512 | 51.826381 | H | 52.913757 | -41.021389 | 51.940968 | H | 52.689142 | -40.958894 | 52.041836 |
| H | 53.740204 | -39.750649 | 52.699720 | H | 53.736469 | -39.672769 | 52.723225 | H | 53.577330 | -39.636161 | 52.806781 |
| H | 50.919510 | -48.109600 | 50.045022 | H | 51.001763 | -48.165729 | 50.240340 | H | 51.122710 | -48.225736 | 50.370952 |
| H | 56.151974 | -48.392033 | 44.238377 | H | 56.233711 | -48.275665 | 44.158664 | H | 56.273780 | -48.194800 | 44.100137 |
| H | 57.382346 | -43.248769 | 46.886989 | H | 57.251743 | -43.195989 | 46.902995 | H | 56.929780 | -43.160657 | 46.885951 |
| H | 53.178544 | -42.865774 | 46.034254 | H | 53.054051 | -42.841431 | 46.058696 | H | 52.684345 | -43.122852 | 46.212748 |
| H | 51.832975 | -38.919402 | 51.261771 | H | 51.860395 | -38.839280 | 51.271972 | H | 51.901564 | -38.696914 | 51.229288 |
| H | 53.388432 | -38.218725 | 50.749890 | H | 53.433333 | -38.258438 | 50.668378 | H | 53.536003 | -38.352084 | 50.612304 |
| O | 52.127757 | -43.992763 | 46.817677 | O | 52.010161 | -44.066442 | 46.823195 | O | 51.864748 | -44.395777 | 47.157930 |
| H | 52.779209 | -44.255700 | 47.517422 | H | 52.706102 | -44.337940 | 47.480178 | H | 52.685139 | -44.579085 | 47.707194 |
| H | 51.539605 | -43.344250 | 47.284019 | H | 51.416210 | -43.483406 | 47.351112 | H | 51.313525 | -43.822356 | 47.736319 |
| O | 56.288666 | -46.409051 | 48.902583 | O | 56.237660 | -46.382777 | 48.842742 | O | 56.299980 | -46.426704 | 48.828142 |
| H | 55.611583 | -45.685100 | 48.759980 | H | 55.517812 | -45.707072 | 48.695459 | H | 55.533218 | -45.783347 | 48.708168 |
| H | 56.857868 | -46.062430 | 49.619500 | H | 56.795048 | -45.955816 | 49.534265 | H | 56.858378 | -45.982876 | 49.505101 |
| H | 52.022267 | -48.052608 | 42.009103 | H | 52.018957 | -48.067415 | 42.046930 | H | 52.011815 | -48.078877 | 42.079910 |

**Heme (Fe<sup>3+</sup>) with NO<sub>2</sub><sup>-</sup>**

| <b>S=1/2</b> |           |            | <b>S=3/2</b> |   |           | <b>S=5/2</b> |           |   |           |            |           |
|--------------|-----------|------------|--------------|---|-----------|--------------|-----------|---|-----------|------------|-----------|
| C            | 50.331000 | -52.045950 | 49.409000    | C | 50.331000 | -52.045950   | 49.409000 | C | 50.331000 | -52.045950 | 49.409000 |
| C            | 50.439999 | -50.558739 | 49.744984    | C | 50.500108 | -50.596924   | 49.865194 | C | 50.502266 | -50.643529 | 49.993159 |
| C            | 51.861528 | -50.029592 | 49.568927    | C | 51.903755 | -50.065466   | 49.585741 | C | 51.840363 | -50.027706 | 49.594955 |
| N            | 51.896360 | -48.594182 | 49.857614    | N | 51.993067 | -48.662315   | 49.995995 | N | 51.948859 | -48.659724 | 50.106084 |
| C            | 52.943831 | -47.789846 | 49.652055    | C | 53.040785 | -47.860527   | 49.789220 | C | 53.001219 | -47.859908 | 49.909246 |
| N            | 54.085757 | -48.278174 | 49.149078    | N | 54.114767 | -48.302525   | 49.119596 | N | 54.038090 | -48.280541 | 49.175454 |
| N            | 52.851802 | -46.487356 | 49.948206    | N | 53.023509 | -46.603305   | 50.254486 | N | 53.042537 | -46.634775 | 50.458446 |
| C            | 52.225000 | -47.068010 | 42.455410    | C | 52.225000 | -47.068010   | 42.455410 | C | 52.225000 | -47.068010 | 42.455410 |
| C            | 53.691265 | -46.960458 | 42.865852    | C | 53.694158 | -46.906269   | 42.837185 | C | 53.703258 | -46.965961 | 42.824989 |
| C            | 54.074547 | -48.084486 | 43.833581    | C | 54.134265 | -48.012742   | 43.800499 | C | 54.098069 | -48.055457 | 43.829501 |
| N            | 55.357057 | -47.878291 | 44.504812    | N | 55.412655 | -47.750799   | 44.460286 | N | 55.347536 | -47.782812 | 44.535151 |
| C            | 55.531176 | -47.050338 | 45.542326    | C | 55.557472 | -46.947697   | 45.520123 | C | 55.451371 | -46.982927 | 45.604956 |
| N            | 54.497962 | -46.365686 | 46.037896    | N | 54.495095 | -46.332254   | 46.049017 | N | 54.360830 | -46.449013 | 46.159837 |
| N            | 56.758066 | -46.864541 | 46.067308    | N | 56.779411 | -46.708962   | 46.035958 | N | 56.663870 | -46.678123 | 46.108969 |

|    |           |            |           |    |           |            |           |    |           |            |           |
|----|-----------|------------|-----------|----|-----------|------------|-----------|----|-----------|------------|-----------|
| C  | 57.624000 | -44.932480 | 42.491060 | C  | 57.624000 | -44.932480 | 42.491060 | C  | 57.624000 | -44.932480 | 42.491060 |
| C  | 57.584000 | -43.404240 | 42.750400 | C  | 57.584000 | -43.404240 | 42.750400 | C  | 57.584000 | -43.404240 | 42.750400 |
| C  | 57.424555 | -43.049750 | 44.234551 | C  | 57.261075 | -43.021825 | 44.202895 | C  | 57.090061 | -42.998538 | 44.144993 |
| C  | 58.604865 | -43.451968 | 45.109126 | C  | 58.368727 | -43.330065 | 45.203787 | C  | 58.034479 | -43.398343 | 45.272805 |
| N  | 58.398795 | -42.923963 | 46.497302 | N  | 58.053344 | -42.688443 | 46.523531 | N  | 57.623733 | -42.741809 | 46.553940 |
| C  | 51.838000 | -42.751710 | 40.914430 | C  | 51.838000 | -42.751710 | 40.914430 | C  | 51.838000 | -42.751710 | 40.914430 |
| C  | 52.531000 | -43.413060 | 42.112930 | C  | 52.531000 | -43.413060 | 42.112930 | C  | 52.531000 | -43.413060 | 42.112930 |
| C  | 52.774138 | -42.485546 | 43.301301 | C  | 52.474468 | -42.605498 | 43.406129 | C  | 52.215457 | -42.830736 | 43.483008 |
| C  | 53.934570 | -43.038231 | 44.107277 | C  | 53.623784 | -43.044907 | 44.290382 | C  | 53.017334 | -43.610992 | 44.509204 |
| N  | 54.016693 | -42.434064 | 45.460454 | N  | 53.501369 | -42.526540 | 45.673561 | N  | 52.894823 | -43.080930 | 45.890785 |
| Fe | 55.036194 | -42.215933 | 49.480811 | Fe | 54.884061 | -42.264438 | 49.738644 | Fe | 54.741493 | -42.293682 | 49.881062 |
| C  | 57.575767 | -43.967806 | 50.908917 | C  | 57.527664 | -44.116283 | 50.802621 | C  | 57.488770 | -44.101888 | 50.767829 |
| C  | 52.749701 | -43.736301 | 51.500739 | C  | 52.793405 | -43.862754 | 51.867118 | C  | 52.858787 | -43.830447 | 52.189291 |
| C  | 52.526055 | -40.717007 | 47.697511 | C  | 52.244265 | -40.993317 | 47.985169 | C  | 52.014649 | -41.269953 | 48.141810 |
| C  | 57.320597 | -40.134118 | 47.967136 | C  | 56.983560 | -39.988030 | 48.302268 | C  | 56.682856 | -39.965351 | 48.353853 |
| N  | 55.169551 | -43.587848 | 50.941973 | N  | 55.144134 | -43.732511 | 51.092490 | N  | 55.125627 | -43.749101 | 51.218628 |
| C  | 56.285285 | -44.203074 | 51.378849 | C  | 56.300130 | -44.363665 | 51.396727 | C  | 56.308443 | -44.388024 | 51.424196 |
| C  | 56.007164 | -45.122398 | 52.561084 | C  | 56.126043 | -45.302101 | 52.592090 | C  | 56.218430 | -45.337142 | 52.624491 |
| C  | 56.365066 | -46.603804 | 52.305047 | C  | 56.373391 | -46.789879 | 52.257096 | C  | 56.339669 | -46.832285 | 52.244020 |
| C  | 56.677700 | -44.591925 | 53.877229 | C  | 56.984231 | -44.831653 | 53.809941 | C  | 57.225739 | -44.958959 | 53.753765 |
| C  | 58.206986 | -44.809064 | 54.103136 | C  | 58.531587 | -45.023839 | 53.789426 | C  | 58.728038 | -45.322618 | 53.599588 |
| O  | 58.923181 | -45.305998 | 53.188440 | O  | 59.081369 | -45.667118 | 52.849271 | O  | 59.160081 | -45.847404 | 52.531720 |
| O  | 58.579306 | -44.441113 | 55.248474 | O  | 59.101705 | -44.499807 | 54.784083 | O  | 59.416345 | -45.040502 | 54.618560 |
| C  | 54.545407 | -44.934309 | 52.697687 | C  | 54.691890 | -45.063549 | 52.906060 | C  | 54.830864 | -45.045105 | 53.083757 |
| C  | 54.097087 | -44.049694 | 51.741964 | C  | 54.158055 | -44.166664 | 51.998646 | C  | 54.231980 | -44.151944 | 52.218267 |
| N  | 53.056435 | -42.300058 | 49.556118 | N  | 52.904907 | -42.464804 | 49.873278 | N  | 52.828328 | -42.555075 | 50.104676 |
| C  | 52.288037 | -42.997351 | 50.444888 | C  | 52.230893 | -43.181078 | 50.811353 | C  | 52.221998 | -43.200239 | 51.153601 |
| C  | 50.797234 | -42.849177 | 50.156905 | C  | 50.726347 | -43.159307 | 50.566079 | C  | 50.704259 | -43.187911 | 51.015825 |
| C  | 50.100609 | -44.207973 | 49.939530 | C  | 50.126692 | -44.575682 | 50.451628 | C  | 50.084811 | -44.596246 | 51.102310 |
| C  | 50.114988 | -42.082025 | 51.330949 | C  | 50.032123 | -42.380460 | 51.724921 | C  | 50.117293 | -42.273659 | 52.136984 |
| C  | 48.602247 | -41.787128 | 51.147373 | C  | 48.493974 | -42.201034 | 51.591884 | C  | 48.582245 | -42.081981 | 52.110211 |
| O  | 47.988253 | -41.563769 | 52.226960 | O  | 47.920936 | -41.907056 | 52.677138 | O  | 48.093058 | -41.692470 | 53.208890 |
| O  | 48.132832 | -41.768248 | 49.974452 | O  | 47.966637 | -42.331395 | 50.452255 | O  | 47.955055 | -42.289319 | 51.036020 |
| C  | 50.843967 | -41.999196 | 48.939775 | C  | 50.670247 | -42.378632 | 49.299020 | C  | 50.556705 | -42.546938 | 49.678973 |
| C  | 52.153477 | -41.665269 | 48.675794 | C  | 51.946180 | -41.933446 | 48.985765 | C  | 51.799593 | -42.126563 | 49.233378 |
| N  | 54.950634 | -40.769625 | 48.088511 | N  | 54.662383 | -40.809447 | 48.395319 | N  | 54.415226 | -40.927338 | 48.501938 |
| C  | 53.799709 | -40.272578 | 47.478456 | C  | 53.485391 | -40.419256 | 47.783068 | C  | 53.225883 | -40.660542 | 47.856210 |
| C  | 54.147098 | -39.210320 | 46.550251 | C  | 53.736105 | -39.288930 | 46.918468 | C  | 53.402894 | -39.556778 | 46.944588 |
| C  | 55.494632 | -39.050316 | 46.629694 | C  | 55.060620 | -38.972243 | 47.053993 | C  | 54.694203 | -39.124447 | 47.087000 |
| C  | 55.983627 | -40.019390 | 47.596241 | C  | 55.636521 | -39.927183 | 47.965641 | C  | 55.332378 | -39.988451 | 48.042382 |
| N  | 57.035442 | -42.074309 | 49.436881 | N  | 56.862241 | -42.080700 | 49.581921 | N  | 56.713095 | -42.066135 | 49.612740 |
| C  | 57.801092 | -41.103676 | 48.832632 | C  | 57.561892 | -41.018284 | 49.032489 | C  | 57.347267 | -40.966471 | 49.060041 |
| C  | 59.208387 | -41.333987 | 49.112693 | C  | 58.976765 | -41.254525 | 49.166860 | C  | 58.768755 | -41.164193 | 49.103876 |
| C  | 59.280031 | -42.477358 | 49.849833 | C  | 59.124359 | -42.488783 | 49.748867 | C  | 58.981696 | -42.415391 | 49.639605 |
| C  | 57.916978 | -42.920411 | 50.075024 | C  | 57.797626 | -42.979344 | 50.037609 | C  | 57.690189 | -42.950013 | 49.987014 |
| N  | 55.112747 | -43.564791 | 48.201705 | N  | 54.930087 | -43.602854 | 48.366178 | N  | 54.904507 | -43.765472 | 48.459792 |
| O  | 55.862329 | -43.577903 | 47.141654 | O  | 55.542269 | -43.465011 | 47.240810 | O  | 55.174350 | -43.473244 | 47.195601 |
| O  | 54.396686 | -44.681940 | 48.306881 | O  | 54.322385 | -44.762596 | 48.479804 | O  | 54.185570 | -44.911339 | 48.560686 |
| C  | 52.817850 | -39.154270 | 50.828390 | C  | 52.817850 | -39.154270 | 50.828390 | C  | 52.817850 | -39.154270 | 50.828390 |
| C  | 53.579354 | -40.113204 | 51.736889 | C  | 53.410708 | -40.102515 | 51.866127 | C  | 53.418789 | -40.007583 | 51.942238 |
| S  | 55.218772 | -40.594923 | 51.084525 | S  | 55.003329 | -40.875733 | 51.436240 | S  | 54.978862 | -40.849550 | 51.524610 |
| H  | 54.606987 | -45.704785 | 46.828355 | H  | 54.583846 | -45.711311 | 46.867177 | H  | 54.411783 | -45.824920 | 46.988162 |
| H  | 49.301982 | -52.397813 | 49.547044 | H  | 49.316175 | -52.401304 | 49.622646 | H  | 49.366922 | -52.474465 | 49.706427 |
| H  | 50.982375 | -52.648899 | 50.055931 | H  | 51.036222 | -52.710951 | 49.925850 | H  | 51.122055 | -52.721470 | 49.760811 |
| H  | 50.616674 | -52.239128 | 48.366001 | H  | 50.502008 | -52.144801 | 48.328184 | H  | 50.366527 | -52.024727 | 48.311521 |
| H  | 49.765486 | -49.978520 | 49.097750 | H  | 49.770702 | -49.954174 | 49.349707 | H  | 49.690517 | -49.989991 | 49.639576 |
| H  | 50.121221 | -50.383258 | 50.783163 | H  | 50.297533 | -50.514948 | 50.943434 | H  | 50.435039 | -50.678404 | 51.090310 |
| H  | 52.552255 | -50.561515 | 50.241345 | H  | 52.653376 | -50.660018 | 50.130889 | H  | 52.669754 | -50.631435 | 49.995279 |

|   |           |            |           |   |           |            |           |   |           |            |           |
|---|-----------|------------|-----------|---|-----------|------------|-----------|---|-----------|------------|-----------|
| H | 52.194096 | -50.197739 | 48.532674 | H | 52.120864 | -50.142928 | 48.508602 | H | 51.926371 | -50.015037 | 48.495801 |
| H | 54.940252 | -47.706476 | 49.149953 | H | 54.988387 | -47.762670 | 49.131241 | H | 54.926135 | -47.763030 | 49.179010 |
| H | 54.195792 | -49.279670 | 49.052402 | H | 54.174432 | -49.280999 | 48.867445 | H | 54.026937 | -49.207063 | 48.770636 |
| H | 53.530771 | -45.803453 | 49.603844 | H | 53.634574 | -45.884036 | 49.857390 | H | 53.588111 | -45.893335 | 49.991603 |
| H | 51.980233 | -46.104648 | 50.295798 | H | 52.204882 | -46.256795 | 50.741533 | H | 52.263362 | -46.321202 | 51.026060 |
| H | 51.972592 | -46.326719 | 41.689614 | H | 51.936752 | -46.364091 | 41.667285 | H | 51.968093 | -46.396635 | 41.628886 |
| H | 51.559977 | -46.909788 | 43.315303 | H | 51.569206 | -46.900953 | 43.320589 | H | 51.582801 | -46.819125 | 43.311554 |
| H | 53.874701 | -45.988783 | 43.345534 | H | 53.853973 | -45.927620 | 43.310859 | H | 53.920561 | -45.981601 | 43.261128 |
| H | 54.349627 | -47.002212 | 41.987464 | H | 54.336436 | -46.928311 | 41.946317 | H | 54.335889 | -47.054811 | 41.931655 |
| H | 54.144403 | -49.039534 | 43.302501 | H | 54.240463 | -48.964628 | 43.269498 | H | 54.219567 | -49.020384 | 43.325680 |
| H | 53.291581 | -48.221345 | 44.596286 | H | 53.365421 | -48.183878 | 44.570210 | H | 53.297527 | -48.207965 | 44.569168 |
| H | 53.556617 | -46.577951 | 45.733230 | H | 53.560272 | -46.608358 | 45.775907 | H | 53.446844 | -46.793170 | 45.894980 |
| H | 57.500414 | -47.477159 | 45.747327 | H | 57.547504 | -47.270425 | 45.683094 | H | 57.458798 | -47.183001 | 45.731025 |
| H | 56.803563 | -46.595004 | 47.062074 | H | 56.818947 | -46.499737 | 47.048096 | H | 56.703196 | -46.495379 | 47.129070 |
| H | 57.669193 | -45.142164 | 41.415866 | H | 57.813383 | -45.140056 | 41.431435 | H | 57.920187 | -45.140817 | 41.456774 |
| H | 56.723250 | -45.417223 | 42.894250 | H | 56.664675 | -45.395486 | 42.762119 | H | 56.634202 | -45.379835 | 42.658720 |
| H | 58.499374 | -45.400533 | 42.959305 | H | 58.414286 | -45.422308 | 43.075062 | H | 58.340398 | -45.437507 | 43.152177 |
| H | 58.494345 | -42.931821 | 42.354211 | H | 58.541621 | -42.949625 | 42.457895 | H | 58.583658 | -42.976726 | 42.583953 |
| H | 56.743026 | -42.964494 | 42.196423 | H | 56.818274 | -42.954160 | 42.103722 | H | 56.921713 | -42.937241 | 42.008934 |
| H | 56.534277 | -43.557519 | 44.632694 | H | 56.351990 | -43.549213 | 44.527847 | H | 56.099675 | -43.440193 | 44.334769 |
| H | 57.259906 | -41.965539 | 44.335283 | H | 57.044251 | -41.943223 | 44.245063 | H | 56.957832 | -41.905922 | 44.167777 |
| H | 59.550599 | -43.043429 | 44.737838 | H | 59.335496 | -42.935011 | 44.874139 | H | 59.063445 | -43.090470 | 45.055607 |
| H | 58.698353 | -44.539254 | 45.194332 | H | 58.469637 | -44.403756 | 45.389607 | H | 58.019731 | -44.477883 | 45.454173 |
| H | 58.403811 | -41.894168 | 46.512111 | H | 58.007489 | -41.664981 | 46.438593 | H | 57.613438 | -41.719642 | 46.457575 |
| H | 59.129870 | -43.226011 | 47.152762 | H | 58.760652 | -42.879762 | 47.249949 | H | 58.275651 | -42.945916 | 47.326993 |
| H | 51.681203 | -43.474618 | 40.104067 | H | 51.900890 | -43.389471 | 40.023911 | H | 52.123881 | -43.250694 | 39.980686 |
| H | 52.445596 | -41.925738 | 40.520438 | H | 52.306599 | -41.787520 | 40.675661 | H | 52.112454 | -41.691682 | 40.829390 |
| H | 50.857613 | -42.342922 | 41.195606 | H | 50.774947 | -42.566394 | 41.121255 | H | 50.744920 | -42.808686 | 41.006822 |
| H | 53.498637 | -43.815059 | 41.769674 | H | 53.586203 | -43.588672 | 41.846771 | H | 53.621312 | -43.371297 | 41.959111 |
| H | 51.947525 | -44.277356 | 42.456878 | H | 52.094818 | -44.402067 | 42.297708 | H | 52.269729 | -44.478396 | 42.122999 |
| H | 51.870165 | -42.414954 | 43.923557 | H | 51.512261 | -42.758685 | 43.915764 | H | 51.139514 | -42.899753 | 43.702906 |
| H | 53.017589 | -41.467332 | 42.963699 | H | 52.567366 | -41.528627 | 43.200878 | H | 52.495062 | -41.766505 | 43.526006 |
| H | 54.878528 | -42.859397 | 43.585674 | H | 54.573008 | -42.692126 | 43.877076 | H | 54.081879 | -43.589120 | 44.243985 |
| H | 53.828655 | -44.118801 | 44.266358 | H | 53.672306 | -44.137957 | 44.373603 | H | 52.703298 | -44.660584 | 44.534481 |
| H | 53.987892 | -41.406625 | 45.441840 | H | 53.305367 | -41.518845 | 45.706713 | H | 52.663223 | -42.083111 | 45.905537 |
| H | 54.871564 | -42.735369 | 45.990333 | H | 54.375080 | -42.698415 | 46.224530 | H | 53.825016 | -43.196537 | 46.415413 |
| H | 58.369805 | -44.531504 | 51.403715 | H | 58.368364 | -44.705873 | 51.172250 | H | 58.362611 | -44.676699 | 51.083762 |
| H | 52.020459 | -44.176405 | 52.178274 | H | 52.124020 | -44.304996 | 52.602802 | H | 52.245766 | -44.247936 | 52.985739 |
| H | 51.718289 | -40.260321 | 47.128328 | H | 51.404205 | -40.606570 | 47.410629 | H | 51.134909 | -40.947948 | 47.587343 |
| H | 58.029992 | -39.426528 | 47.541422 | H | 57.637862 | -39.209153 | 47.913356 | H | 57.283135 | -39.162997 | 47.927180 |
| H | 57.440538 | -46.702096 | 52.128430 | H | 57.418670 | -46.932890 | 51.965246 | H | 57.333711 | -47.028867 | 51.829828 |
| H | 55.794700 | -46.999978 | 51.456097 | H | 55.697359 | -47.125343 | 51.461647 | H | 55.557703 | -47.113310 | 51.530020 |
| H | 56.108270 | -47.193219 | 53.194151 | H | 56.180239 | -47.397545 | 53.150558 | H | 56.216421 | -47.442754 | 53.147928 |
| H | 56.483892 | -43.514086 | 53.966322 | H | 56.788988 | -43.766029 | 53.988615 | H | 57.167489 | -43.877242 | 53.937631 |
| H | 56.165229 | -45.070108 | 54.722920 | H | 56.617688 | -45.365252 | 54.699360 | H | 56.881936 | -45.444580 | 54.678343 |
| H | 53.923490 | -45.434894 | 53.434143 | H | 54.141063 | -45.564136 | 53.696861 | H | 54.344035 | -45.534111 | 53.922400 |
| H | 50.577919 | -44.777027 | 49.129838 | H | 50.609272 | -45.146929 | 49.646662 | H | 50.493747 | -45.253159 | 50.322186 |
| H | 49.052401 | -44.035778 | 49.674468 | H | 49.058651 | -44.490263 | 50.226209 | H | 49.002607 | -44.519944 | 50.954712 |
| H | 50.129269 | -44.799277 | 50.865723 | H | 50.236844 | -45.117982 | 51.401458 | H | 50.271430 | -45.043899 | 52.087391 |
| H | 50.620551 | -41.115984 | 51.473406 | H | 50.468733 | -41.373453 | 51.796258 | H | 50.566524 | -41.272858 | 52.059086 |
| H | 50.258791 | -42.653943 | 52.257498 | H | 50.246737 | -42.887008 | 52.675483 | H | 50.409661 | -42.679241 | 53.114906 |
| H | 49.961189 | -41.618901 | 48.437490 | H | 49.743383 | -42.076782 | 48.823997 | H | 49.599153 | -42.303268 | 49.232489 |
| H | 53.428562 | -38.651972 | 45.958249 | H | 52.976103 | -38.781352 | 46.331910 | H | 52.616755 | -39.139560 | 46.322780 |
| H | 56.123264 | -38.335458 | 46.107672 | H | 55.611558 | -38.164956 | 46.581054 | H | 55.186447 | -38.298484 | 46.582603 |
| H | 60.016546 | -40.692296 | 48.774558 | H | 59.751474 | -40.569046 | 48.836032 | H | 59.505264 | -40.452608 | 48.743411 |
| H | 60.157293 | -42.968460 | 50.259116 | H | 60.040899 | -42.999814 | 50.026789 | H | 59.926019 | -42.909978 | 49.843693 |
| H | 52.612960 | -39.596355 | 49.852282 | H | 52.454199 | -39.687500 | 49.950251 | H | 52.375886 | -39.768958 | 50.043762 |
| H | 52.995392 | -41.016248 | 51.946149 | H | 52.712002 | -40.914367 | 52.110853 | H | 52.709926 | -40.769683 | 52.290851 |



|   |           |            |           |   |           |            |           |   |           |            |           |
|---|-----------|------------|-----------|---|-----------|------------|-----------|---|-----------|------------|-----------|
| H | 53.789290 | -39.638651 | 52.705528 | H | 53.629840 | -39.570150 | 52.801586 | H | 53.684060 | -39.389893 | 52.810424 |
| H | 51.037113 | -48.166343 | 50.187340 | H | 51.175794 | -48.255952 | 50.440135 | H | 51.130287 | -48.258290 | 50.552236 |
| H | 56.155155 | -48.422887 | 44.198477 | H | 56.236265 | -48.237902 | 44.125060 | H | 56.201220 | -48.194238 | 44.174551 |
| H | 57.453162 | -43.200854 | 46.894259 | H | 57.115371 | -42.987912 | 46.909089 | H | 56.627068 | -43.032973 | 46.870919 |
| H | 53.207233 | -42.803383 | 46.027503 | H | 52.746364 | -43.048148 | 46.193819 | H | 52.189303 | -43.609936 | 46.462212 |
| H | 51.855678 | -38.875880 | 51.284172 | H | 51.969424 | -38.618105 | 51.275752 | H | 52.024956 | -38.519649 | 51.246997 |
| H | 53.396553 | -38.235604 | 50.664891 | H | 53.557899 | -38.412296 | 50.501629 | H | 53.575018 | -38.502937 | 50.374619 |
| O | 52.196032 | -44.042070 | 46.797729 | O | 51.937446 | -44.345285 | 47.104763 | O | 51.634426 | -44.814785 | 47.649765 |
| H | 52.846394 | -44.298327 | 47.501161 | H | 52.667771 | -44.548813 | 47.739372 | H | 52.525211 | -44.840870 | 48.104042 |
| H | 51.523090 | -43.513174 | 47.274217 | H | 51.293883 | -43.839773 | 47.650115 | H | 51.080624 | -44.255230 | 48.235245 |
| O | 56.333440 | -46.441592 | 48.874364 | O | 56.379126 | -46.455016 | 48.842839 | O | 56.292552 | -46.487790 | 48.890161 |
| H | 55.685374 | -45.693017 | 48.771758 | H | 55.690069 | -45.741382 | 48.804551 | H | 55.554134 | -45.811593 | 48.870298 |
| H | 56.957727 | -46.141819 | 49.563348 | H | 57.015476 | -46.128211 | 49.511590 | H | 56.924887 | -46.136266 | 49.548378 |
| H | 52.003573 | -48.060118 | 42.038211 | H | 52.026718 | -48.080013 | 42.075419 | H | 51.969671 | -48.087486 | 42.134475 |

**Table S9.** Cartesian coordinates (Å) of the heme species (Fe<sup>2+</sup> & Fe<sup>3+</sup>) without ligands (and without the cubane cluster) optimized at DFT (BP86 functional) using TZ2P basis sets. S is the spin state of the species.

|    |           |           | Heme (Fe <sup>2+</sup> ) without HSO <sub>3</sub> <sup>-</sup> |    |           |           |           |    |           |           |           |
|----|-----------|-----------|----------------------------------------------------------------|----|-----------|-----------|-----------|----|-----------|-----------|-----------|
|    |           |           | S=0                                                            |    | S=1       |           | S=2       |    |           |           |           |
| C  | 50.331000 | 4.395000  | 71.629000                                                      | C  | 50.331000 | 4.395000  | 71.629000 | C  | 50.331000 | 4.395000  | 71.629000 |
| C  | 51.626816 | 5.182187  | 71.437405                                                      | C  | 51.588097 | 5.069956  | 71.070520 | C  | 51.580616 | 5.263094  | 71.474370 |
| C  | 51.772848 | 5.647207  | 69.993800                                                      | C  | 51.287329 | 6.032242  | 69.920435 | C  | 51.676542 | 5.903988  | 70.089894 |
| N  | 52.978464 | 6.459853  | 69.825150                                                      | N  | 52.545891 | 6.583883  | 69.399929 | N  | 52.951126 | 6.615875  | 69.962272 |
| C  | 53.332775 | 7.027386  | 68.670520                                                      | C  | 52.664370 | 7.455007  | 68.395130 | C  | 53.285345 | 7.462604  | 68.986611 |
| N  | 52.581683 | 6.836652  | 67.579579                                                      | N  | 51.577697 | 7.985160  | 67.824721 | N  | 52.404950 | 7.774289  | 68.018095 |
| N  | 54.471418 | 7.739947  | 68.568328                                                      | N  | 53.879813 | 7.764286  | 67.901618 | N  | 54.525714 | 7.961657  | 68.922587 |
| C  | 52.225000 | 2.268000  | 63.346000                                                      | C  | 52.225000 | 2.268000  | 63.346000 | C  | 52.225000 | 2.268000  | 63.346000 |
| C  | 53.680222 | 2.637733  | 63.629170                                                      | C  | 53.655574 | 2.787987  | 63.465244 | C  | 53.725261 | 2.554480  | 63.388836 |
| C  | 53.901256 | 2.944746  | 65.113003                                                      | C  | 54.239472 | 2.570752  | 64.865236 | C  | 54.318248 | 2.306377  | 64.783274 |
| N  | 55.263940 | 3.389140  | 65.415247                                                      | N  | 55.542764 | 3.220020  | 65.042339 | N  | 55.628953 | 2.931613  | 64.973112 |
| C  | 55.731879 | 4.615086  | 65.176070                                                      | C  | 55.703618 | 4.547029  | 65.131109 | C  | 55.799764 | 4.253411  | 65.134163 |
| N  | 54.900952 | 5.614532  | 64.861112                                                      | N  | 54.662561 | 5.343757  | 65.380096 | N  | 54.747541 | 5.034349  | 65.380792 |
| N  | 57.053594 | 4.860191  | 65.213917                                                      | N  | 56.917429 | 5.093908  | 64.958525 | N  | 57.026151 | 4.783922  | 65.049226 |
| C  | 57.624000 | 3.668000  | 61.733000                                                      | C  | 57.624000 | 3.668000  | 61.733000 | C  | 57.624000 | 3.668000  | 61.733000 |
| C  | 57.584000 | 4.849000  | 60.729000                                                      | C  | 57.584000 | 4.849000  | 60.729000 | C  | 57.584000 | 4.849000  | 60.729000 |
| C  | 57.546480 | 6.216792  | 61.411813                                                      | C  | 57.741978 | 6.218880  | 61.415074 | C  | 57.928155 | 6.187157  | 61.405760 |
| C  | 58.754604 | 6.485251  | 62.306183                                                      | C  | 59.164810 | 6.429887  | 61.918150 | C  | 59.412682 | 6.254296  | 61.744727 |
| N  | 58.630723 | 7.825227  | 62.945432                                                      | N  | 59.310587 | 7.709286  | 62.681319 | N  | 59.729588 | 7.400274  | 62.652796 |
| C  | 51.838000 | 3.862000  | 59.049000                                                      | C  | 51.838000 | 3.862000  | 59.049000 | C  | 51.838000 | 3.862000  | 59.049000 |
| C  | 52.531000 | 4.355000  | 60.326000                                                      | C  | 52.531000 | 4.355000  | 60.326000 | C  | 52.531000 | 4.355000  | 60.326000 |
| C  | 52.580904 | 5.873555  | 60.498990                                                      | C  | 53.176638 | 5.734850  | 60.182371 | C  | 52.695688 | 5.868375  | 60.497069 |
| C  | 53.031713 | 6.187560  | 61.915299                                                      | C  | 53.794808 | 6.147266  | 61.504887 | C  | 53.421235 | 6.110710  | 61.816033 |
| N  | 53.104433 | 7.652271  | 62.195763                                                      | N  | 54.374937 | 7.524070  | 61.479720 | N  | 53.421243 | 7.530372  | 62.265430 |
| Fe | 54.663781 | 10.703963 | 64.105321                                                      | Fe | 55.467380 | 10.579920 | 62.761749 | Fe | 55.031214 | 10.438356 | 63.105735 |
| C  | 58.051844 | 10.423960 | 64.172393                                                      | C  | 57.866723 | 10.741218 | 65.204047 | C  | 57.974364 | 10.324821 | 64.887928 |
| C  | 54.595342 | 10.632587 | 67.504130                                                      | C  | 53.024954 | 10.311904 | 65.155786 | C  | 53.260394 | 10.392573 | 66.058715 |
| C  | 51.217252 | 10.642192 | 64.021312                                                      | C  | 53.103095 | 10.187114 | 60.293828 | C  | 52.099952 | 10.259905 | 61.306300 |
| C  | 54.742525 | 10.665072 | 60.675155                                                      | C  | 57.947220 | 10.293717 | 60.351652 | C  | 56.795534 | 9.936041  | 60.169610 |
| N  | 55.987448 | 10.262463 | 65.466400                                                      | N  | 55.472933 | 10.469703 | 64.774961 | N  | 55.549233 | 10.174303 | 65.124016 |
| C  | 57.345589 | 10.040178 | 65.280233                                                      | C  | 56.565967 | 10.642770 | 65.613049 | C  | 56.819961 | 10.282664 | 65.631876 |
| C  | 57.968533 | 9.426091  | 66.523704                                                      | C  | 56.174350 | 10.732610 | 67.090376 | C  | 56.824506 | 10.447372 | 67.151541 |
| C  | 57.784370 | 7.871001  | 66.511588                                                      | C  | 56.744408 | 9.548260  | 67.906585 | C  | 57.437193 | 9.210823  | 67.856779 |
| C  | 59.445096 | 9.772008  | 66.751697                                                      | C  | 56.565523 | 12.092378 | 67.733699 | C  | 57.526067 | 11.755357 | 67.621032 |
| C  | 60.554894 | 9.087983  | 65.907942                                                      | C  | 58.037435 | 12.402353 | 68.132160 | C  | 59.077581 | 11.825407 | 67.727151 |
| O  | 60.261665 | 8.311794  | 64.919385                                                      | O  | 58.954080 | 11.556148 | 67.903785 | O  | 59.795329 | 10.921819 | 67.198951 |
| O  | 61.723062 | 9.336509  | 66.269301                                                      | O  | 58.180623 | 13.528132 | 68.683553 | O  | 59.492629 | 12.836445 | 68.355545 |
| C  | 56.986532 | 9.937366  | 67.545122                                                      | C  | 54.683490 | 10.644362 | 66.961905 | C  | 55.349023 | 10.539922 | 67.402013 |
| C  | 55.835731 | 10.290590 | 66.899346                                                      | C  | 54.336960 | 10.507747 | 65.648366 | C  | 54.669346 | 10.392632 | 66.223900 |

|   |           |           |           |   |           |           |           |   |           |           |           |
|---|-----------|-----------|-----------|---|-----------|-----------|-----------|---|-----------|-----------|-----------|
| N | 53.207419 | 10.568591 | 65.491676 | N | 53.510119 | 10.266022 | 62.752184 | N | 53.126167 | 10.344923 | 63.596403 |
| C | 53.411016 | 10.767384 | 66.854177 | C | 52.674581 | 10.171063 | 63.849433 | C | 52.587124 | 10.385879 | 64.866902 |
| C | 52.120976 | 11.170393 | 67.569624 | C | 51.237315 | 9.833067  | 63.456609 | C | 51.058268 | 10.440258 | 64.842610 |
| C | 51.772174 | 10.253410 | 68.756287 | C | 50.936372 | 8.362906  | 63.854187 | C | 50.414109 | 9.298983  | 65.653778 |
| C | 52.270109 | 12.642480 | 68.055017 | C | 50.201450 | 10.794801 | 64.091912 | C | 50.583119 | 11.816198 | 65.396325 |
| C | 51.013018 | 13.290155 | 68.690230 | C | 48.764032 | 10.273900 | 63.861203 | C | 49.042465 | 11.972340 | 65.491798 |
| O | 51.248266 | 14.356334 | 69.327150 | O | 48.176310 | 9.781966  | 64.870327 | O | 48.627478 | 12.600609 | 66.507135 |
| O | 49.888977 | 12.738185 | 68.514123 | O | 48.320238 | 10.346247 | 62.679836 | O | 48.345041 | 11.483663 | 64.557222 |
| C | 51.143124 | 11.072087 | 66.447965 | C | 51.334995 | 9.946370  | 61.976575 | C | 50.806217 | 10.327003 | 63.382399 |
| C | 51.810487 | 10.785579 | 65.291410 | C | 52.650270 | 10.163895 | 61.622223 | C | 52.002873 | 10.310402 | 62.709843 |
| N | 53.318374 | 10.549118 | 62.701998 | N | 55.520188 | 10.235060 | 60.780537 | N | 54.542516 | 10.019517 | 61.166655 |
| C | 51.910189 | 10.483624 | 62.852029 | C | 54.429640 | 10.199820 | 59.913837 | C | 53.271231 | 10.133282 | 60.596824 |
| C | 51.280571 | 10.327433 | 61.561980 | C | 54.870107 | 10.069386 | 58.548934 | C | 53.359131 | 10.037323 | 59.163834 |
| C | 52.270897 | 10.353853 | 60.624496 | C | 56.234254 | 10.030852 | 58.571462 | C | 54.681255 | 9.888604  | 58.851721 |
| C | 53.525015 | 10.516524 | 61.320910 | C | 56.638959 | 10.159406 | 59.943793 | C | 55.416287 | 9.910486  | 60.086091 |
| N | 56.111359 | 10.603767 | 62.698979 | N | 57.472978 | 10.498982 | 62.772250 | N | 56.961116 | 10.174242 | 62.624769 |
| C | 55.962309 | 10.764919 | 61.321359 | C | 58.341039 | 10.500478 | 61.666737 | C | 57.511677 | 10.104855 | 61.345706 |
| C | 57.233891 | 11.004445 | 60.712648 | C | 59.685137 | 10.727145 | 62.092186 | C | 58.933305 | 10.255068 | 61.413379 |
| C | 58.168301 | 11.009634 | 61.724010 | C | 59.655095 | 10.849863 | 63.465334 | C | 59.255763 | 10.411706 | 62.747417 |
| C | 57.466468 | 10.746559 | 62.944841 | C | 58.292384 | 10.708774 | 63.866577 | C | 58.031862 | 10.324118 | 63.485539 |
| C | 52.837000 | 13.766000 | 62.641000 | C | 52.837000 | 13.766000 | 62.641000 | C | 52.837000 | 13.766000 | 62.641000 |
| C | 53.265328 | 13.615013 | 64.094531 | C | 54.040743 | 13.423461 | 63.516107 | C | 53.867378 | 13.533259 | 63.737070 |
| S | 54.903912 | 12.839796 | 64.277417 | S | 55.437295 | 12.719691 | 62.569186 | S | 55.382749 | 12.703266 | 63.129396 |
| H | 55.243521 | 6.486079  | 64.441316 | H | 54.722032 | 6.347721  | 65.143408 | H | 54.784379 | 6.064945  | 65.310452 |
| H | 50.236187 | 4.048931  | 72.664627 | H | 50.593042 | 3.738124  | 72.466337 | H | 50.275796 | 3.977444  | 72.641331 |
| H | 50.301989 | 3.512429  | 70.975906 | H | 49.834729 | 3.784063  | 70.862136 | H | 50.338436 | 3.558445  | 70.916670 |
| H | 49.454731 | 5.015847  | 71.401100 | H | 49.607691 | 5.136558  | 71.993969 | H | 49.416956 | 4.978416  | 71.456828 |
| H | 51.632436 | 6.061266  | 72.098979 | H | 52.099041 | 5.627931  | 71.869741 | H | 51.585043 | 6.059435  | 72.232999 |
| H | 52.494565 | 4.563277  | 71.708635 | H | 52.292538 | 4.303088  | 70.712737 | H | 52.480420 | 4.651533  | 71.645208 |
| H | 51.827944 | 4.779722  | 69.318735 | H | 50.759541 | 5.512055  | 69.106769 | H | 51.601486 | 5.136614  | 69.302781 |
| H | 50.889136 | 6.243381  | 69.712503 | H | 50.644754 | 6.851888  | 70.276977 | H | 50.847601 | 6.614520  | 69.953940 |
| H | 52.816943 | 7.278989  | 66.680092 | H | 51.680168 | 8.628359  | 67.047918 | H | 52.598543 | 8.582149  | 67.420777 |
| H | 51.646183 | 6.461270  | 67.679394 | H | 50.660736 | 7.897780  | 68.245238 | H | 51.425149 | 7.548739  | 68.148968 |
| H | 54.466823 | 8.567106  | 67.951092 | H | 54.039747 | 8.694494  | 67.472544 | H | 54.740890 | 8.762262  | 68.306205 |
| H | 55.006747 | 7.881185  | 69.419347 | H | 54.689193 | 7.393498  | 68.388240 | H | 55.166720 | 7.801031  | 69.691293 |
| H | 52.090562 | 1.981793  | 62.296830 | H | 51.845403 | 2.395763  | 62.326697 | H | 51.837176 | 2.327516  | 62.324223 |
| H | 51.548055 | 3.107095  | 63.560689 | H | 51.550700 | 2.804100  | 64.027470 | H | 51.665664 | 2.981628  | 63.966836 |
| H | 53.975010 | 3.511501  | 63.029332 | H | 53.674583 | 3.862991  | 63.236987 | H | 53.914111 | 3.599012  | 63.105049 |
| H | 54.349189 | 1.817150  | 63.335629 | H | 54.310354 | 2.297334  | 62.731125 | H | 54.261816 | 1.934449  | 62.658124 |
| H | 53.721114 | 2.052737  | 65.722812 | H | 54.389329 | 1.504593  | 65.064858 | H | 54.447638 | 1.234965  | 64.968364 |
| H | 53.184480 | 3.699424  | 65.468982 | H | 53.546924 | 2.927887  | 65.641966 | H | 53.633821 | 2.660922  | 65.568849 |
| H | 53.904477 | 5.519390  | 65.004528 | H | 53.743554 | 4.939967  | 65.504998 | H | 53.835565 | 4.611816  | 65.492705 |
| H | 57.690920 | 4.102515  | 65.432279 | H | 57.714317 | 4.490746  | 64.800013 | H | 57.806900 | 4.196399  | 64.788649 |
| H | 57.367588 | 5.793280  | 65.475092 | H | 57.112085 | 6.069091  | 65.209133 | H | 57.223601 | 5.777410  | 65.209004 |
| H | 57.573691 | 2.708443  | 61.203841 | H | 57.522345 | 2.710841  | 61.208181 | H | 57.435660 | 2.714629  | 61.223970 |
| H | 56.770518 | 3.716116  | 62.424871 | H | 56.794657 | 3.746604  | 62.448811 | H | 56.847976 | 3.798015  | 62.498093 |
| H | 58.544475 | 3.669583  | 62.329682 | H | 58.566086 | 3.636447  | 62.295088 | H | 58.596672 | 3.583590  | 62.234759 |
| H | 58.458423 | 4.792753  | 60.064078 | H | 58.369315 | 4.727047  | 59.969924 | H | 58.277562 | 4.663492  | 59.896592 |
| H | 56.697822 | 4.752441  | 60.086747 | H | 56.628186 | 4.829668  | 60.187622 | H | 56.580728 | 4.916663  | 60.287800 |
| H | 56.635614 | 6.287998  | 62.028237 | H | 57.043282 | 6.288960  | 62.265978 | H | 57.334462 | 6.290553  | 62.329099 |
| H | 57.477665 | 7.011084  | 60.652973 | H | 57.497782 | 7.029397  | 60.709987 | H | 57.660535 | 7.035423  | 60.760168 |
| H | 59.694038 | 6.461180  | 61.743704 | H | 59.866264 | 6.470233  | 61.078546 | H | 60.017909 | 6.374594  | 60.839801 |
| H | 58.825599 | 5.751839  | 63.116428 | H | 59.483262 | 5.626319  | 62.589652 | H | 59.750209 | 5.349924  | 62.261085 |
| H | 58.732330 | 8.580521  | 62.255376 | H | 58.963248 | 8.532895  | 62.145597 | H | 59.465989 | 8.325904  | 62.243859 |
| H | 59.324478 | 8.032660  | 63.768360 | H | 60.297075 | 7.906704  | 62.877120 | H | 60.734523 | 7.446224  | 62.850503 |
| H | 51.834025 | 2.765633  | 59.011117 | H | 51.391084 | 2.872730  | 59.206198 | H | 51.766029 | 2.767513  | 59.054059 |
| H | 52.348783 | 4.228996  | 58.148160 | H | 52.550914 | 3.783775  | 58.217169 | H | 52.392616 | 4.161829  | 58.149501 |
| H | 50.795997 | 4.207342  | 59.010215 | H | 51.038183 | 4.550342  | 58.745392 | H | 50.820644 | 4.268326  | 58.967510 |

|   |           |           |           |   |           |           |           |   |           |           |           |
|---|-----------|-----------|-----------|---|-----------|-----------|-----------|---|-----------|-----------|-----------|
| H | 53.556099 | 3.955060  | 60.368703 | H | 53.301235 | 3.628316  | 60.627410 | H | 53.525159 | 3.883535  | 60.393983 |
| H | 52.001414 | 3.929861  | 61.190976 | H | 51.798246 | 4.394623  | 61.145822 | H | 51.963240 | 3.988189  | 61.192022 |
| H | 51.582874 | 6.307621  | 60.333137 | H | 52.418227 | 6.476334  | 59.888009 | H | 51.709170 | 6.355571  | 60.521284 |
| H | 53.263312 | 6.330832  | 59.767459 | H | 53.943203 | 5.722372  | 59.392929 | H | 53.258746 | 6.310600  | 59.662711 |
| H | 54.027257 | 5.776144  | 62.122978 | H | 54.601332 | 5.466598  | 61.806044 | H | 54.469600 | 5.794909  | 61.757626 |
| H | 52.328376 | 5.764736  | 62.642197 | H | 53.040442 | 6.149818  | 62.301378 | H | 52.938945 | 5.539329  | 62.617709 |
| H | 53.925016 | 8.091653  | 61.763417 | H | 55.220632 | 7.597846  | 60.903101 | H | 53.997092 | 8.177137  | 61.681980 |
| H | 53.133339 | 7.839394  | 63.234673 | H | 54.607374 | 7.811959  | 62.464665 | H | 53.790666 | 7.615316  | 63.249196 |
| H | 59.136322 | 10.372591 | 64.210651 | H | 58.603844 | 10.934970 | 65.987407 | H | 58.897647 | 10.485986 | 65.451680 |
| H | 54.616921 | 10.826189 | 68.575799 | H | 52.221774 | 10.324310 | 65.892059 | H | 52.671819 | 10.584983 | 66.956455 |
| H | 50.130809 | 10.682821 | 63.966965 | H | 52.347841 | 10.136113 | 59.512185 | H | 51.166700 | 10.310522 | 60.748806 |
| H | 54.731579 | 10.714615 | 59.587962 | H | 58.722706 | 10.276221 | 59.587086 | H | 57.358377 | 9.880285  | 59.239286 |
| H | 58.405380 | 7.419939  | 65.726805 | H | 57.832992 | 9.645908  | 67.984382 | H | 58.510240 | 9.164085  | 67.642697 |
| H | 56.719579 | 7.623492  | 66.394122 | H | 56.491794 | 8.591434  | 67.427801 | H | 56.941063 | 8.287433  | 67.528769 |
| H | 58.111362 | 7.465590  | 67.477288 | H | 56.322091 | 9.560436  | 68.921175 | H | 57.314180 | 9.312387  | 68.943645 |
| H | 59.587177 | 10.857118 | 66.646219 | H | 56.232073 | 12.902484 | 67.070155 | H | 57.208835 | 12.580929 | 66.967292 |
| H | 59.693912 | 9.543279  | 67.797543 | H | 55.974300 | 12.200156 | 68.655833 | H | 57.138118 | 11.997782 | 68.620436 |
| H | 57.090294 | 9.803472  | 68.618602 | H | 53.985003 | 10.824092 | 67.776389 | H | 54.904814 | 10.840459 | 68.348162 |
| H | 51.632280 | 9.218655  | 68.419470 | H | 51.718073 | 7.691072  | 63.470152 | H | 50.837840 | 8.324662  | 65.373232 |
| H | 50.843011 | 10.604095 | 69.217808 | H | 49.976107 | 8.041711  | 63.435705 | H | 49.335470 | 9.282764  | 65.462770 |
| H | 52.572278 | 10.277129 | 69.508093 | H | 50.883565 | 8.257453  | 64.945637 | H | 50.560481 | 9.466303  | 66.730022 |
| H | 52.573386 | 13.271462 | 67.205035 | H | 50.325590 | 11.790144 | 63.645701 | H | 50.965324 | 12.615152 | 64.744243 |
| H | 53.096204 | 12.687131 | 68.779490 | H | 50.387774 | 10.869367 | 65.170745 | H | 51.021224 | 11.970858 | 66.391134 |
| H | 50.084389 | 11.278984 | 66.551738 | H | 50.495565 | 9.837228  | 61.298738 | H | 49.817437 | 10.347710 | 62.939775 |
| H | 50.208743 | 10.245112 | 61.411463 | H | 54.203014 | 10.009200 | 57.694628 | H | 52.507165 | 10.087579 | 58.492935 |
| H | 52.177672 | 10.293235 | 59.544256 | H | 56.922872 | 9.951338  | 57.735595 | H | 55.135768 | 9.806235  | 57.869053 |
| H | 57.393855 | 11.152360 | 59.649439 | H | 60.540211 | 10.783544 | 61.424934 | H | 59.592180 | 10.283351 | 60.550400 |
| H | 59.239902 | 11.170840 | 61.648137 | H | 60.478824 | 11.036071 | 64.147313 | H | 60.231524 | 10.574950 | 63.195430 |
| H | 52.772128 | 12.798270 | 62.139123 | H | 52.430577 | 12.864684 | 62.165400 | H | 52.519725 | 12.817238 | 62.193027 |
| H | 52.528939 | 13.042128 | 64.669852 | H | 53.770958 | 12.722087 | 64.315407 | H | 53.449870 | 12.924710 | 64.549127 |
| H | 53.357697 | 14.597366 | 64.580296 | H | 54.446839 | 14.324215 | 63.998201 | H | 54.193695 | 14.486900 | 64.173152 |
| H | 53.486782 | 6.732247  | 70.660822 | H | 53.402687 | 6.289279  | 69.857906 | H | 53.673311 | 6.382639  | 70.637216 |
| H | 55.924343 | 2.697565  | 65.754804 | H | 56.375168 | 2.650692  | 64.934360 | H | 56.456184 | 2.360004  | 64.844358 |
| H | 57.675182 | 7.925278  | 63.336283 | H | 58.818368 | 7.694595  | 63.614264 | H | 59.228778 | 7.327322  | 63.577033 |
| H | 52.286031 | 8.162055  | 61.817381 | H | 53.707620 | 8.225269  | 61.094220 | H | 52.472824 | 7.933140  | 62.258592 |
| H | 51.850739 | 14.250003 | 62.584252 | H | 52.044114 | 14.221163 | 63.251340 | H | 51.946429 | 14.267660 | 63.047864 |
| H | 53.553953 | 14.386111 | 62.087233 | H | 53.113265 | 14.474726 | 61.850597 | H | 53.250161 | 14.396314 | 61.842501 |
| O | 52.818415 | 7.959774  | 64.962565 | O | 54.693051 | 7.852176  | 64.240665 | O | 54.396351 | 7.705210  | 64.876286 |
| H | 53.090237 | 8.937705  | 65.173905 | H | 55.253311 | 8.665833  | 64.424960 | H | 55.029941 | 8.490792  | 64.863698 |
| H | 51.845419 | 8.026536  | 64.918057 | H | 53.803900 | 8.228662  | 64.446438 | H | 53.628825 | 8.102766  | 65.343778 |
| O | 55.787171 | 8.021945  | 63.712181 | O | 58.115309 | 7.754324  | 65.219754 | O | 58.340355 | 7.378955  | 65.106929 |
| H | 55.829832 | 8.814547  | 63.094244 | H | 57.878499 | 8.720973  | 65.315816 | H | 58.064181 | 8.339812  | 65.117101 |
| H | 55.808752 | 8.522431  | 64.570681 | H | 58.799522 | 7.623664  | 65.902354 | H | 58.961496 | 7.318508  | 65.856421 |
| H | 51.908222 | 1.416894  | 63.964429 | H | 52.169790 | 1.198632  | 63.590156 | H | 52.005654 | 1.258132  | 63.719850 |

Heme (Fe<sup>3+</sup>) without HSO<sub>3</sub><sup>-</sup>

| S=1/2 |           |          | S=3/2     |   |           | S=5/2    |           |   |           |          |           |
|-------|-----------|----------|-----------|---|-----------|----------|-----------|---|-----------|----------|-----------|
| C     | 50.331000 | 4.395000 | 71.629000 | C | 50.331000 | 4.395000 | 71.629000 | C | 50.331000 | 4.395000 | 71.629000 |
| C     | 50.711626 | 5.862154 | 71.439369 | C | 51.524650 | 5.332672 | 71.806603 | C | 51.128274 | 5.652804 | 71.974449 |
| C     | 49.905259 | 6.511193 | 70.319061 | C | 51.809302 | 6.147026 | 70.547028 | C | 51.665304 | 6.336793 | 70.721333 |
| N     | 50.367238 | 7.878299 | 70.086696 | N | 52.970986 | 7.014319 | 70.768828 | N | 52.439941 | 7.527484 | 71.081237 |
| C     | 49.984836 | 8.639992 | 69.051949 | C | 53.412361 | 7.939194 | 69.920834 | C | 53.122055 | 8.273576 | 70.213600 |
| N     | 49.046338 | 8.208444 | 68.196806 | N | 52.850300 | 8.070286 | 68.704132 | N | 53.093316 | 7.967165 | 68.905981 |
| N     | 50.550624 | 9.828489 | 68.822217 | N | 54.431126 | 8.741684 | 70.254365 | N | 53.861708 | 9.303055 | 70.643140 |
| C     | 52.225000 | 2.268000 | 63.346000 | C | 52.225000 | 2.268000 | 63.346000 | C | 52.225000 | 2.268000 | 63.346000 |
| C     | 53.640328 | 2.703468 | 63.717715 | C | 53.734482 | 2.385086 | 63.561698 | C | 53.702594 | 2.633235 | 63.472038 |
| C     | 53.781738 | 2.931356 | 65.224580 | C | 54.078570 | 2.509088 | 65.052338 | C | 54.224019 | 2.440477 | 64.901316 |
| N     | 55.088111 | 3.480983 | 65.597775 | N | 55.457951 | 2.924041 | 65.314997 | N | 55.563255 | 3.002500 | 65.104471 |
| C     | 55.440362 | 4.758272 | 65.443285 | C | 55.897006 | 4.181832 | 65.181445 | C | 55.818451 | 4.314537 | 65.157757 |

|    |           |           |           |    |           |           |           |    |           |           |           |
|----|-----------|-----------|-----------|----|-----------|-----------|-----------|----|-----------|-----------|-----------|
| N  | 54.529709 | 5.699435  | 65.181020 | N  | 55.037931 | 5.129312  | 64.753307 | N  | 54.815027 | 5.190630  | 65.272342 |
| N  | 56.739446 | 5.112663  | 65.505548 | N  | 57.164579 | 4.504123  | 65.427331 | N  | 57.078353 | 4.766658  | 65.080878 |
| C  | 57.624000 | 3.668000  | 61.733000 | C  | 57.624000 | 3.668000  | 61.733000 | C  | 57.624000 | 3.668000  | 61.733000 |
| C  | 57.584000 | 4.849000  | 60.729000 | C  | 57.584000 | 4.849000  | 60.729000 | C  | 57.584000 | 4.849000  | 60.729000 |
| C  | 57.856384 | 6.237284  | 61.325599 | C  | 57.952776 | 6.189083  | 61.381185 | C  | 57.786194 | 6.214451  | 61.411644 |
| C  | 59.322445 | 6.425369  | 61.689052 | C  | 59.433542 | 6.248735  | 61.741008 | C  | 59.230915 | 6.422008  | 61.847286 |
| N  | 59.614532 | 7.851823  | 62.052193 | N  | 59.721060 | 7.404354  | 62.646639 | N  | 59.394674 | 7.684995  | 62.640609 |
| C  | 51.838000 | 3.862000  | 59.049000 | C  | 51.838000 | 3.862000  | 59.049000 | C  | 51.838000 | 3.862000  | 59.049000 |
| C  | 52.531000 | 4.355000  | 60.326000 | C  | 52.531000 | 4.355000  | 60.326000 | C  | 52.531000 | 4.355000  | 60.326000 |
| C  | 52.930334 | 5.832624  | 60.335398 | C  | 53.180295 | 5.737205  | 60.205391 | C  | 53.262121 | 5.687500  | 60.144227 |
| C  | 53.777085 | 6.108478  | 61.570438 | C  | 53.751815 | 6.147063  | 61.552783 | C  | 53.801510 | 6.156752  | 61.480934 |
| N  | 53.928899 | 7.567458  | 61.843727 | N  | 54.323711 | 7.535114  | 61.549724 | N  | 54.561352 | 7.443208  | 61.391846 |
| Fe | 55.105608 | 10.734416 | 61.715900 | Fe | 54.765643 | 10.711954 | 63.663680 | Fe | 55.531513 | 10.652876 | 62.855908 |
| C  | 58.115751 | 11.847311 | 62.738023 | C  | 57.901860 | 9.950693  | 64.778943 | C  | 57.839176 | 10.422039 | 65.417939 |
| C  | 53.880418 | 10.848585 | 64.877396 | C  | 53.730856 | 11.146029 | 66.833996 | C  | 52.991507 | 10.349518 | 65.151118 |
| C  | 52.047047 | 9.983538  | 60.464387 | C  | 51.553899 | 10.253428 | 62.587852 | C  | 53.263670 | 10.103265 | 60.295009 |
| C  | 56.564017 | 9.326801  | 58.907162 | C  | 55.883513 | 10.704992 | 60.440860 | C  | 58.078986 | 10.618246 | 60.548981 |
| N  | 55.818644 | 11.391829 | 63.405281 | N  | 55.570334 | 10.252042 | 65.425695 | N  | 55.457411 | 10.325647 | 64.887057 |
| C  | 57.048115 | 11.948759 | 63.613529 | C  | 56.886904 | 9.880897  | 65.685886 | C  | 56.521226 | 10.335176 | 65.770060 |
| C  | 57.169409 | 12.572432 | 64.995318 | C  | 57.077947 | 9.607110  | 67.174035 | C  | 56.054622 | 10.289627 | 67.225429 |
| C  | 58.376153 | 12.075048 | 65.816674 | C  | 56.679437 | 8.138141  | 67.546502 | C  | 56.392743 | 8.914707  | 67.863301 |
| C  | 57.161729 | 14.137570 | 64.904205 | C  | 58.469516 | 9.935150  | 67.729585 | C  | 56.579642 | 11.465704 | 68.101416 |
| C  | 58.392424 | 14.862752 | 64.285767 | C  | 59.666530 | 8.988174  | 67.459924 | C  | 58.002732 | 11.359701 | 68.730751 |
| O  | 59.421545 | 14.199812 | 63.971849 | O  | 59.594243 | 8.026472  | 66.598785 | O  | 58.852580 | 10.572140 | 68.224914 |
| O  | 58.217983 | 16.104792 | 64.172580 | O  | 60.691920 | 9.235140  | 68.120034 | O  | 58.163864 | 12.124801 | 69.716447 |
| C  | 55.881387 | 12.134092 | 65.591324 | C  | 55.957912 | 10.466111 | 67.696740 | C  | 54.587208 | 10.432840 | 67.024435 |
| C  | 55.139589 | 11.468939 | 64.659898 | C  | 55.050409 | 10.677982 | 66.681389 | C  | 54.289060 | 10.409178 | 65.676531 |
| N  | 53.384358 | 10.387750 | 62.533967 | N  | 53.018615 | 10.769735 | 64.531700 | N  | 53.541117 | 10.267849 | 62.765151 |
| C  | 53.073470 | 10.391939 | 63.885791 | C  | 52.779185 | 11.079548 | 65.851247 | C  | 52.673958 | 10.219712 | 63.821835 |
| C  | 51.663681 | 9.852246  | 64.145641 | C  | 51.293097 | 11.269514 | 66.134170 | C  | 51.239926 | 9.976224  | 63.381615 |
| C  | 51.743791 | 8.459044  | 64.818505 | C  | 50.783347 | 10.393516 | 67.294563 | C  | 50.704489 | 8.647188  | 63.963534 |
| C  | 50.838740 | 10.818092 | 65.031508 | C  | 51.028889 | 12.773704 | 66.445467 | C  | 50.342049 | 11.166384 | 63.834042 |
| C  | 49.464161 | 10.261284 | 65.442946 | C  | 49.543155 | 13.146450 | 66.711911 | C  | 48.845328 | 11.045549 | 63.433085 |
| O  | 49.108288 | 10.497496 | 66.654626 | O  | 49.393627 | 14.189244 | 67.405334 | O  | 48.084177 | 11.755132 | 64.148866 |
| O  | 48.790503 | 9.625434  | 64.603328 | O  | 48.649184 | 12.415987 | 66.202558 | O  | 48.536172 | 10.306579 | 62.462931 |
| C  | 51.151524 | 9.770627  | 62.742528 | C  | 50.719366 | 10.858901 | 64.826363 | C  | 51.412537 | 9.920626  | 61.910947 |
| C  | 52.163281 | 10.084626 | 61.872038 | C  | 51.741026 | 10.600829 | 63.934486 | C  | 52.746891 | 10.103393 | 61.600844 |
| N  | 54.458965 | 9.851634  | 60.047494 | N  | 53.910100 | 10.472093 | 61.904438 | N  | 55.652414 | 10.332253 | 60.866880 |
| C  | 53.111172 | 9.820799  | 59.628436 | C  | 52.558275 | 10.240158 | 61.644567 | C  | 54.598093 | 10.237764 | 59.966457 |
| C  | 53.030365 | 9.384250  | 58.254689 | C  | 52.350956 | 10.094750 | 60.227374 | C  | 55.091750 | 10.250945 | 58.611765 |
| C  | 54.296797 | 9.091387  | 57.854371 | C  | 53.557543 | 10.322757 | 59.618356 | C  | 56.447319 | 10.379564 | 58.683418 |
| C  | 55.179521 | 9.405764  | 58.955456 | C  | 54.524000 | 10.547076 | 60.654466 | C  | 56.793979 | 10.440337 | 60.078178 |
| N  | 56.957814 | 10.503804 | 61.036095 | N  | 56.532206 | 10.419549 | 62.791974 | N  | 57.530721 | 10.517555 | 62.955634 |
| C  | 57.388422 | 9.870193  | 59.873431 | C  | 56.833472 | 10.650091 | 61.448295 | C  | 58.424395 | 10.669491 | 61.893953 |
| C  | 58.816696 | 10.015440 | 59.727375 | C  | 58.252161 | 10.690599 | 61.263008 | C  | 59.753398 | 10.843243 | 62.392335 |
| C  | 59.241789 | 10.808629 | 60.760736 | C  | 58.823815 | 10.463210 | 62.495595 | C  | 59.678834 | 10.776292 | 63.766364 |
| C  | 58.086388 | 11.103064 | 61.568335 | C  | 57.746551 | 10.288968 | 63.425044 | C  | 58.304929 | 10.575031 | 64.099894 |
| C  | 52.837000 | 13.766000 | 62.641000 | C  | 52.837000 | 13.766000 | 62.641000 | C  | 52.837000 | 13.766000 | 62.641000 |
| C  | 54.253354 | 13.891437 | 62.088345 | C  | 53.750586 | 13.801691 | 63.857855 | C  | 53.939427 | 13.514163 | 63.664173 |
| S  | 54.712872 | 12.655206 | 60.829882 | S  | 55.243992 | 12.775473 | 63.709023 | S  | 55.495080 | 12.933944 | 62.885483 |
| H  | 54.827799 | 6.666370  | 64.980318 | H  | 55.237023 | 6.125583  | 64.854733 | H  | 54.939724 | 6.180517  | 65.019506 |
| H  | 50.908215 | 3.944548  | 72.445235 | H  | 50.149603 | 3.827594  | 72.549090 | H  | 49.944677 | 3.921984  | 72.539397 |
| H  | 50.527847 | 3.816196  | 70.716160 | H  | 50.507418 | 3.674906  | 70.818337 | H  | 50.957996 | 3.658116  | 71.107597 |
| H  | 49.264567 | 4.287555  | 71.871315 | H  | 49.416730 | 4.955410  | 71.393102 | H  | 49.474416 | 4.631886  | 70.983019 |
| H  | 50.546477 | 6.420743  | 72.372930 | H  | 51.339206 | 6.024852  | 72.641301 | H  | 50.492024 | 6.362604  | 72.524151 |
| H  | 51.782501 | 5.944166  | 71.198775 | H  | 52.422877 | 4.750628  | 72.062906 | H  | 51.972819 | 5.396749  | 72.631467 |
| H  | 50.024360 | 5.931798  | 69.389876 | H  | 52.009598 | 5.476933  | 69.696481 | H  | 52.315526 | 5.644832  | 70.164081 |
| H  | 48.835586 | 6.512643  | 70.580467 | H  | 50.936574 | 6.769481  | 70.298413 | H  | 50.827527 | 6.626653  | 70.067033 |

|   |           |           |           |   |           |           |           |   |           |           |           |
|---|-----------|-----------|-----------|---|-----------|-----------|-----------|---|-----------|-----------|-----------|
| H | 48.734078 | 8.896302  | 67.488613 | H | 53.013140 | 8.928453  | 68.181940 | H | 53.545736 | 8.577834  | 68.230646 |
| H | 48.437602 | 7.443426  | 68.456656 | H | 51.955288 | 7.624778  | 68.534319 | H | 52.373223 | 7.348447  | 68.554022 |
| H | 50.179503 | 10.372138 | 68.012680 | H | 54.871767 | 9.311977  | 69.537227 | H | 54.331331 | 9.922568  | 69.996869 |
| H | 51.292795 | 10.175159 | 69.414297 | H | 54.954849 | 8.580977  | 71.105938 | H | 53.985731 | 9.483141  | 71.631097 |
| H | 52.149365 | 2.056798  | 62.273714 | H | 51.991180 | 2.107834  | 62.287911 | H | 51.882977 | 2.366643  | 62.310409 |
| H | 51.491148 | 3.047825  | 63.591394 | H | 51.705108 | 3.178788  | 63.673807 | H | 51.600792 | 2.919707  | 63.972517 |
| H | 53.902377 | 3.631182  | 63.188391 | H | 54.123040 | 3.260318  | 63.020595 | H | 53.847629 | 3.682947  | 63.177523 |
| H | 54.372630 | 1.946756  | 63.403588 | H | 54.255632 | 1.511618  | 63.147933 | H | 54.313869 | 2.028772  | 62.787956 |
| H | 53.668963 | 1.990004  | 65.772608 | H | 53.934295 | 1.550314  | 65.559904 | H | 54.289330 | 1.376434  | 65.149917 |
| H | 52.988682 | 3.593840  | 65.598843 | H | 53.396334 | 3.215898  | 65.550652 | H | 53.531017 | 2.877946  | 65.636039 |
| H | 53.545882 | 5.501741  | 65.311506 | H | 54.050469 | 4.902603  | 64.754921 | H | 53.865202 | 4.848639  | 65.340657 |
| H | 57.435417 | 4.411798  | 65.731697 | H | 57.820244 | 3.788019  | 65.715043 | H | 57.843777 | 4.107705  | 65.015485 |
| H | 56.971401 | 6.068282  | 65.750085 | H | 57.523773 | 5.462152  | 65.240948 | H | 57.313419 | 5.742015  | 65.287063 |
| H | 57.364380 | 2.730542  | 61.228438 | H | 57.310048 | 2.736565  | 61.247629 | H | 57.503031 | 2.713222  | 61.208122 |
| H | 56.904926 | 3.827384  | 62.549201 | H | 56.946489 | 3.856837  | 62.576612 | H | 56.809722 | 3.756670  | 62.464160 |
| H | 58.619007 | 3.543564  | 62.179157 | H | 58.629642 | 3.506046  | 62.139391 | H | 58.574323 | 3.626703  | 62.280181 |
| H | 58.298110 | 4.664705  | 59.912892 | H | 58.257414 | 4.649055  | 59.883680 | H | 58.347189 | 4.712982  | 59.950437 |
| H | 56.592416 | 4.870725  | 60.253921 | H | 56.574244 | 4.924968  | 60.301020 | H | 56.615473 | 4.847641  | 60.210131 |
| H | 57.230055 | 6.400669  | 62.218006 | H | 57.354817 | 6.319693  | 62.298599 | H | 57.129114 | 6.285472  | 62.295421 |
| H | 57.573433 | 7.004366  | 60.587980 | H | 57.714574 | 7.026331  | 60.707538 | H | 57.520420 | 7.030123  | 60.718814 |
| H | 59.969420 | 6.174836  | 60.841945 | H | 60.056322 | 6.347282  | 60.846431 | H | 59.891737 | 6.492414  | 60.978110 |
| H | 59.620261 | 5.812593  | 62.545427 | H | 59.748391 | 5.352774  | 62.285225 | H | 59.585553 | 5.606946  | 62.485394 |
| H | 59.421623 | 8.502532  | 61.263181 | H | 59.443203 | 8.310450  | 62.229650 | H | 58.992926 | 8.508500  | 62.157265 |
| H | 60.600444 | 7.975182  | 62.304417 | H | 60.717543 | 7.460762  | 62.876653 | H | 60.386763 | 7.900277  | 62.787332 |
| H | 51.576813 | 2.800502  | 59.139561 | H | 51.402943 | 2.867561  | 59.205854 | H | 51.335361 | 2.903078  | 59.223999 |
| H | 52.492161 | 3.977359  | 58.173933 | H | 52.547593 | 3.793267  | 58.213442 | H | 52.562192 | 3.721028  | 58.235262 |
| H | 50.913335 | 4.423032  | 58.856019 | H | 51.029391 | 4.542762  | 58.750958 | H | 51.082843 | 4.583161  | 58.709394 |
| H | 53.433589 | 3.744171  | 60.494662 | H | 53.300783 | 3.626490  | 60.625495 | H | 53.251127 | 3.597575  | 60.670821 |
| H | 51.874925 | 4.172811  | 61.189782 | H | 51.797442 | 4.383315  | 61.145964 | H | 51.783019 | 4.466364  | 61.125662 |
| H | 52.029691 | 6.465953  | 60.352832 | H | 52.431765 | 6.478867  | 59.886803 | H | 52.573890 | 6.446106  | 59.742167 |
| H | 53.494401 | 6.098485  | 59.428874 | H | 53.972850 | 5.725741  | 59.441980 | H | 54.083304 | 5.576217  | 59.419709 |
| H | 54.783768 | 5.687014  | 61.471629 | H | 54.553053 | 5.475365  | 61.883883 | H | 54.483617 | 5.421037  | 61.925399 |
| H | 53.313320 | 5.675061  | 62.464518 | H | 52.969005 | 6.148052  | 62.319785 | H | 52.984857 | 6.331584  | 62.191348 |
| H | 54.331765 | 8.106701  | 61.048550 | H | 55.178104 | 7.607149  | 60.986352 | H | 55.437231 | 7.342718  | 60.867922 |
| H | 54.522990 | 7.776867  | 62.689544 | H | 54.531160 | 7.839487  | 62.531038 | H | 54.776297 | 7.763375  | 62.368193 |
| H | 59.031242 | 12.362455 | 63.027881 | H | 58.911803 | 9.751300  | 65.125931 | H | 58.551964 | 10.484058 | 66.246083 |
| H | 53.507306 | 10.848403 | 65.899248 | H | 53.430011 | 11.472517 | 67.828365 | H | 52.173695 | 10.361498 | 65.867877 |
| H | 51.044246 | 9.885526  | 60.053284 | H | 50.532044 | 10.094356 | 62.250089 | H | 52.546220 | 10.015509 | 59.482065 |
| H | 57.024467 | 8.915080  | 58.011974 | H | 56.228693 | 10.814436 | 59.414317 | H | 58.876845 | 10.729437 | 59.817112 |
| H | 59.311424 | 12.338907 | 65.314666 | H | 57.415543 | 7.418921  | 67.181789 | H | 57.480040 | 8.798321  | 67.913685 |
| H | 58.318166 | 10.990234 | 65.981672 | H | 55.688459 | 7.891158  | 67.144633 | H | 55.945016 | 8.095354  | 67.285130 |
| H | 58.364657 | 12.558726 | 66.801432 | H | 56.642193 | 8.050344  | 68.639323 | H | 56.011575 | 8.865362  | 68.892081 |
| H | 56.275826 | 14.460902 | 64.342545 | H | 58.775305 | 10.934350 | 67.388601 | H | 56.545811 | 12.394230 | 67.513764 |
| H | 57.030825 | 14.523693 | 65.925688 | H | 58.393841 | 10.004594 | 68.823251 | H | 55.876457 | 11.610485 | 68.933445 |
| H | 55.574674 | 12.341882 | 66.612038 | H | 55.841448 | 10.788306 | 68.728394 | H | 53.848975 | 10.603584 | 67.804658 |
| H | 52.371746 | 7.774024  | 64.232513 | H | 50.948084 | 9.330784  | 67.075646 | H | 51.358537 | 7.806418  | 63.689459 |
| H | 50.743342 | 8.020675  | 64.898384 | H | 49.708964 | 10.560020 | 67.419296 | H | 49.704374 | 8.460230  | 63.559559 |
| H | 52.179766 | 8.552341  | 65.822965 | H | 51.286676 | 10.659324 | 68.232914 | H | 50.644793 | 8.706784  | 65.057675 |
| H | 50.680408 | 11.761215 | 64.489039 | H | 51.358011 | 13.386393 | 65.593799 | H | 50.721564 | 12.099063 | 63.396169 |
| H | 51.412296 | 11.061860 | 65.933892 | H | 51.636028 | 13.071418 | 67.310452 | H | 50.406914 | 11.274652 | 64.924036 |
| H | 50.134790 | 9.500392  | 62.482014 | H | 49.656697 | 10.828484 | 64.616678 | H | 50.599417 | 9.778469  | 61.208919 |
| H | 52.103502 | 9.276125  | 57.700526 | H | 51.389299 | 9.895460  | 59.764408 | H | 54.461517 | 10.181203 | 57.731131 |
| H | 54.629549 | 8.709515  | 56.894139 | H | 53.782742 | 10.328376 | 58.556637 | H | 57.164377 | 10.442689 | 57.871023 |
| H | 59.391936 | 9.625607  | 58.892855 | H | 58.746145 | 10.870478 | 60.313604 | H | 60.628552 | 10.998702 | 61.769086 |
| H | 60.241590 | 11.181340 | 60.963066 | H | 59.876809 | 10.470984 | 62.763553 | H | 60.479958 | 10.865787 | 64.492835 |
| H | 52.728108 | 12.853620 | 63.236978 | H | 52.414712 | 12.767677 | 62.490882 | H | 52.583218 | 12.847629 | 62.098569 |
| H | 55.002801 | 13.881252 | 62.886851 | H | 53.227724 | 13.516864 | 64.778081 | H | 53.626915 | 12.777646 | 64.412841 |
| H | 54.378274 | 14.840522 | 61.545991 | H | 54.161896 | 14.809724 | 64.015751 | H | 54.201050 | 14.437919 | 64.195612 |

|   |           |           |           |   |           |           |           |   |           |           |           |
|---|-----------|-----------|-----------|---|-----------|-----------|-----------|---|-----------|-----------|-----------|
| H | 51.067649 | 8.253872  | 70.716132 | H | 53.473613 | 6.902122  | 71.644058 | H | 52.451278 | 7.806042  | 72.057087 |
| H | 55.820411 | 2.823314  | 65.844436 | H | 56.135495 | 2.212129  | 65.563744 | H | 56.352641 | 2.365946  | 65.113266 |
| H | 59.032446 | 8.185390  | 62.858190 | H | 59.163853 | 7.285747  | 63.555207 | H | 58.953270 | 7.611198  | 63.596970 |
| H | 53.006050 | 8.003275  | 62.010004 | H | 53.647756 | 8.212393  | 61.156175 | H | 54.012604 | 8.190206  | 60.915987 |
| H | 52.614837 | 14.625956 | 63.287734 | H | 52.005755 | 14.470148 | 62.781301 | H | 51.932912 | 14.133653 | 63.146224 |
| H | 52.098462 | 13.739728 | 61.830859 | H | 53.381923 | 14.048590 | 61.731877 | H | 53.147995 | 14.517645 | 61.904897 |
| O | 55.334486 | 8.209214  | 64.185646 | O | 54.475497 | 7.909298  | 64.358007 | O | 54.735591 | 7.744569  | 64.159960 |
| H | 56.286422 | 8.502432  | 64.141836 | H | 54.876590 | 8.695085  | 64.838009 | H | 55.201266 | 8.596876  | 64.406032 |
| H | 54.834578 | 8.994676  | 64.529046 | H | 53.532572 | 7.953867  | 64.604524 | H | 53.805762 | 7.972971  | 64.366651 |
| O | 57.967606 | 8.976710  | 64.054567 | O | 58.155381 | 7.046007  | 64.834144 | O | 58.306381 | 7.459588  | 65.216964 |
| H | 57.968874 | 9.917439  | 63.746347 | H | 57.499248 | 7.750492  | 64.662518 | H | 57.997609 | 8.383349  | 65.415039 |
| H | 58.391320 | 9.012871  | 64.932380 | H | 58.718663 | 7.493588  | 65.639941 | H | 59.042729 | 7.324977  | 65.842487 |
| H | 51.938146 | 1.355294  | 63.885701 | H | 51.808665 | 1.423611  | 63.911067 | H | 52.045593 | 1.230430  | 63.658065 |

**Heme (Fe<sup>2+</sup>) without SO<sub>3</sub><sup>2-</sup>**

| S=0 |           |           | S=1       |    |           | S=2       |           |    |           |           |           |
|-----|-----------|-----------|-----------|----|-----------|-----------|-----------|----|-----------|-----------|-----------|
| C   | 50.331000 | 4.395000  | 71.629000 | C  | 50.331000 | 4.395000  | 71.629000 | C  | 50.331000 | 4.395000  | 71.629000 |
| C   | 50.234814 | 5.595128  | 70.688677 | C  | 50.248341 | 5.597030  | 70.688561 | C  | 50.318436 | 5.617960  | 70.714890 |
| C   | 51.613937 | 6.082097  | 70.256295 | C  | 51.626522 | 6.165638  | 70.355130 | C  | 51.731821 | 6.051521  | 70.341550 |
| N   | 51.488438 | 7.247871  | 69.379221 | N  | 51.486386 | 7.304403  | 69.442918 | N  | 51.687433 | 7.237246  | 69.483265 |
| C   | 52.471614 | 7.751416  | 68.637490 | C  | 52.438199 | 7.788750  | 68.650192 | C  | 52.701194 | 7.691134  | 68.758555 |
| N   | 53.710627 | 7.271397  | 68.707561 | N  | 53.697513 | 7.361472  | 68.731294 | N  | 53.907583 | 7.133699  | 68.818339 |
| N   | 52.209084 | 8.736736  | 67.732867 | N  | 52.116784 | 8.685730  | 67.672220 | N  | 52.509124 | 8.718131  | 67.868129 |
| C   | 52.225000 | 2.268000  | 63.346000 | C  | 52.225000 | 2.268000  | 63.346000 | C  | 52.225000 | 2.268000  | 63.346000 |
| C   | 53.730366 | 2.522245  | 63.415279 | C  | 53.741572 | 2.459388  | 63.375598 | C  | 53.715652 | 2.594203  | 63.414211 |
| C   | 54.275776 | 2.415665  | 64.855254 | C  | 54.282651 | 2.457705  | 64.821221 | C  | 54.251830 | 2.496664  | 64.854243 |
| N   | 55.348681 | 3.370297  | 65.137593 | N  | 55.388023 | 3.392480  | 65.051787 | N  | 55.376689 | 3.398785  | 65.112777 |
| C   | 55.131328 | 4.678224  | 65.297030 | C  | 55.211478 | 4.712096  | 65.122719 | C  | 55.238095 | 4.712448  | 65.273941 |
| N   | 53.897089 | 5.167346  | 65.349376 | N  | 54.018021 | 5.238544  | 64.853696 | N  | 54.023529 | 5.264786  | 65.335955 |
| N   | 56.182765 | 5.545801  | 65.355865 | N  | 56.260817 | 5.534236  | 65.413789 | N  | 56.320351 | 5.532020  | 65.317532 |
| C   | 57.624000 | 3.668000  | 61.733000 | C  | 57.624000 | 3.668000  | 61.733000 | C  | 57.624000 | 3.668000  | 61.733000 |
| C   | 57.584000 | 4.849000  | 60.729000 | C  | 57.584000 | 4.849000  | 60.729000 | C  | 57.584000 | 4.849000  | 60.729000 |
| C   | 56.825988 | 6.052271  | 61.313337 | C  | 57.240267 | 6.167450  | 61.444960 | C  | 56.799400 | 6.046670  | 61.292330 |
| C   | 57.672721 | 6.818771  | 62.323559 | C  | 58.362458 | 6.648966  | 62.367601 | C  | 57.639187 | 6.872067  | 62.261665 |
| N   | 56.806784 | 7.609470  | 63.258679 | N  | 57.820598 | 7.358388  | 63.570907 | N  | 56.770603 | 7.653110  | 63.201743 |
| C   | 51.838000 | 3.862000  | 59.049000 | C  | 51.838000 | 3.862000  | 59.049000 | C  | 51.838000 | 3.862000  | 59.049000 |
| C   | 52.531000 | 4.355000  | 60.326000 | C  | 52.531000 | 4.355000  | 60.326000 | C  | 52.531000 | 4.355000  | 60.326000 |
| C   | 51.710893 | 5.407910  | 61.081193 | C  | 53.143977 | 5.747296  | 60.153873 | C  | 51.860304 | 5.597662  | 60.923628 |
| C   | 52.536258 | 6.080879  | 62.167154 | C  | 53.451596 | 6.390157  | 61.494462 | C  | 52.454966 | 5.944845  | 62.278348 |
| N   | 51.731229 | 6.969098  | 63.061630 | N  | 54.112206 | 7.717370  | 61.306684 | N  | 51.830963 | 7.169809  | 62.870698 |
| Fe  | 55.144610 | 10.656360 | 63.877024 | Fe | 55.238892 | 10.572286 | 63.028487 | Fe | 55.099962 | 10.710816 | 64.042071 |
| C   | 57.209351 | 10.825943 | 66.537635 | C  | 56.995044 | 10.660733 | 65.951055 | C  | 57.352438 | 10.526287 | 66.649086 |
| C   | 52.374180 | 11.334763 | 65.824720 | C  | 52.307359 | 10.640338 | 64.756243 | C  | 52.567533 | 11.360496 | 66.223705 |
| C   | 52.962444 | 9.611841  | 61.330415 | C  | 53.505456 | 10.419558 | 60.066706 | C  | 52.838031 | 9.751861  | 61.621803 |
| C   | 57.762601 | 10.261579 | 61.762123 | C  | 58.182328 | 10.005988 | 61.273316 | C  | 57.654059 | 10.325501 | 61.789898 |
| N   | 54.891498 | 10.975115 | 65.766553 | N  | 54.776911 | 10.731324 | 64.938339 | N  | 55.007741 | 10.875142 | 66.074672 |
| C   | 55.863142 | 11.051508 | 66.737949 | C  | 55.652875 | 10.939373 | 65.984432 | C  | 56.039968 | 10.838779 | 66.959042 |
| C   | 55.312013 | 11.472254 | 68.093743 | C  | 54.953044 | 11.477360 | 67.231406 | C  | 55.606723 | 11.244849 | 68.364178 |
| C   | 55.578483 | 10.459017 | 69.224957 | C  | 55.321442 | 10.760265 | 68.540361 | C  | 55.902173 | 10.184653 | 69.442855 |
| C   | 55.810540 | 12.903371 | 68.488108 | C  | 55.224222 | 13.013132 | 67.343924 | C  | 56.227826 | 12.628853 | 68.756867 |
| C   | 57.269054 | 13.114094 | 68.994324 | C  | 56.682509 | 13.503914 | 67.561579 | C  | 57.724429 | 12.729712 | 69.176184 |
| O   | 58.057238 | 12.130285 | 69.100335 | O  | 57.514319 | 12.739759 | 68.135942 | O  | 58.457869 | 11.699436 | 69.190914 |
| O   | 57.520650 | 14.318055 | 69.271260 | O  | 56.898636 | 14.679594 | 67.156047 | O  | 58.065353 | 13.904040 | 69.485716 |
| C   | 53.867149 | 11.577139 | 67.757124 | C  | 53.524992 | 11.271623 | 66.823828 | C  | 54.144390 | 11.447557 | 68.135782 |
| C   | 53.668252 | 11.313991 | 66.436345 | C  | 53.483975 | 10.911021 | 65.499902 | C  | 53.859580 | 11.279481 | 66.804701 |
| N   | 53.052096 | 10.245523 | 63.748965 | N  | 53.342662 | 10.309033 | 62.560940 | N  | 53.135565 | 10.504817 | 63.995156 |
| C   | 52.061042 | 10.831817 | 64.630264 | C  | 52.255683 | 10.348867 | 63.431669 | C  | 52.238878 | 10.945854 | 64.977705 |
| C   | 50.657743 | 10.692282 | 64.061912 | C  | 50.929375 | 10.095755 | 62.709353 | C  | 50.784604 | 10.824479 | 64.521306 |
| C   | 49.889671 | 9.602340  | 64.856870 | C  | 50.412198 | 8.671422  | 63.035023 | C  | 50.041213 | 9.779289  | 65.388156 |

|   |           |           |           |   |           |           |           |   |           |           |           |
|---|-----------|-----------|-----------|---|-----------|-----------|-----------|---|-----------|-----------|-----------|
| C | 49.859875 | 12.011167 | 64.100518 | C | 49.845175 | 11.131355 | 63.084215 | C | 50.044266 | 12.179602 | 64.592090 |
| C | 48.424177 | 11.955615 | 63.513465 | C | 48.464213 | 10.945055 | 62.402752 | C | 48.574479 | 12.185414 | 64.092100 |
| O | 47.683191 | 12.922498 | 63.845002 | O | 47.496697 | 11.473475 | 63.021683 | O | 47.919759 | 13.217711 | 64.409279 |
| O | 48.122063 | 10.989669 | 62.752644 | O | 48.414377 | 10.318341 | 61.305678 | O | 48.160558 | 11.201413 | 63.411860 |
| C | 50.975218 | 10.234090 | 62.670549 | C | 51.386742 | 10.205915 | 61.294790 | C | 50.981613 | 10.343025 | 63.123670 |
| C | 52.304941 | 10.012981 | 62.510435 | C | 52.750193 | 10.340151 | 61.252187 | C | 52.317336 | 10.194921 | 62.859252 |
| N | 55.331212 | 9.932729  | 62.044583 | N | 55.733186 | 10.211677 | 61.102366 | N | 55.237915 | 9.969375  | 62.154818 |
| C | 54.314490 | 9.587249  | 61.121584 | C | 54.880240 | 10.335587 | 60.003847 | C | 54.178834 | 9.699844  | 61.287895 |
| C | 54.894519 | 9.325125  | 59.824225 | C | 55.630079 | 10.252416 | 58.775179 | C | 54.672822 | 9.517738  | 59.948844 |
| C | 56.226112 | 9.584875  | 59.914359 | C | 56.939159 | 10.073158 | 59.115338 | C | 56.019307 | 9.766620  | 59.977075 |
| C | 56.501215 | 9.969578  | 61.275985 | C | 57.008683 | 10.071454 | 60.552730 | C | 56.371828 | 10.060498 | 61.334735 |
| N | 57.082049 | 10.490821 | 64.109754 | N | 57.155318 | 10.232665 | 63.516846 | N | 57.078746 | 10.445931 | 64.189876 |
| C | 58.050702 | 10.446941 | 63.107092 | C | 58.263115 | 10.092105 | 62.657179 | C | 57.997201 | 10.452371 | 63.128658 |
| C | 59.364368 | 10.492774 | 63.685912 | C | 59.465420 | 10.010677 | 63.414755 | C | 59.332902 | 10.436872 | 63.644184 |
| C | 59.202759 | 10.558597 | 65.044764 | C | 59.117347 | 10.128470 | 64.746851 | C | 59.240220 | 10.390160 | 65.013134 |
| C | 57.789196 | 10.597673 | 65.298750 | C | 57.703171 | 10.310362 | 64.795978 | C | 57.845179 | 10.428841 | 65.346437 |
| C | 52.837000 | 13.766000 | 62.641000 | C | 52.837000 | 13.766000 | 62.641000 | C | 52.837000 | 13.766000 | 62.641000 |
| C | 53.894391 | 13.710983 | 63.734607 | C | 54.092903 | 13.609903 | 63.489834 | C | 53.746713 | 13.830060 | 63.861367 |
| S | 55.369864 | 12.724348 | 63.306520 | S | 55.424727 | 12.684711 | 62.651268 | S | 55.344556 | 12.961896 | 63.638361 |
| H | 53.684084 | 6.210296  | 65.300145 | H | 53.793060 | 6.242363  | 64.944558 | H | 53.891974 | 6.282743  | 65.358181 |
| H | 49.331836 | 4.054518  | 71.924784 | H | 49.328430 | 4.011266  | 71.851125 | H | 49.308878 | 4.098338  | 71.892021 |
| H | 50.883580 | 4.650645  | 72.542932 | H | 50.806644 | 4.666494  | 72.581120 | H | 50.871549 | 4.602405  | 72.562260 |
| H | 50.844894 | 3.552059  | 71.146684 | H | 50.912982 | 3.578414  | 71.180072 | H | 50.814906 | 3.537732  | 71.140440 |
| H | 49.651265 | 5.333044  | 69.794093 | H | 49.747653 | 5.310876  | 69.751692 | H | 49.755623 | 5.401842  | 69.795171 |
| H | 49.706309 | 6.420711  | 71.189088 | H | 49.640409 | 6.390509  | 71.149542 | H | 49.809798 | 6.454932  | 71.216687 |
| H | 52.217351 | 6.344143  | 71.139519 | H | 52.144454 | 6.482676  | 71.273339 | H | 52.315479 | 6.273372  | 71.248438 |
| H | 52.141413 | 5.289078  | 69.705987 | H | 52.243635 | 5.401044  | 69.860411 | H | 52.245049 | 5.247673  | 69.793342 |
| H | 54.418885 | 7.550579  | 68.007227 | H | 54.395108 | 7.644819  | 68.029363 | H | 54.645888 | 7.422822  | 68.160787 |
| H | 53.974022 | 6.633649  | 69.448371 | H | 54.000775 | 6.801661  | 69.518356 | H | 54.142988 | 6.487805  | 69.562283 |
| H | 52.904520 | 9.493739  | 67.660962 | H | 52.776273 | 9.484953  | 67.499754 | H | 53.192449 | 9.503332  | 67.944687 |
| H | 51.255429 | 9.088886  | 67.718629 | H | 51.146996 | 8.995487  | 67.673343 | H | 51.560042 | 9.090027  | 67.848871 |
| H | 51.863396 | 2.253325  | 62.312262 | H | 51.853470 | 2.206498  | 62.317340 | H | 51.863850 | 2.217660  | 62.313752 |
| H | 51.664604 | 3.042687  | 63.889699 | H | 51.704491 | 3.101709  | 63.840400 | H | 51.625447 | 3.019098  | 63.880969 |
| H | 53.958121 | 3.525636  | 63.028294 | H | 54.005227 | 3.408788  | 62.888006 | H | 53.898223 | 3.610029  | 63.036685 |
| H | 54.272073 | 1.820993  | 62.767525 | H | 54.243462 | 1.674978  | 62.795874 | H | 54.291659 | 1.922114  | 62.765359 |
| H | 54.676503 | 1.418032  | 65.056174 | H | 54.645311 | 1.466373  | 65.105096 | H | 54.597708 | 1.484368  | 65.081637 |
| H | 53.469178 | 2.567954  | 65.588838 | H | 53.476353 | 2.706716  | 65.529047 | H | 53.455087 | 2.710479  | 65.582735 |
| H | 53.117849 | 4.520919  | 65.371194 | H | 53.231135 | 4.622867  | 64.685590 | H | 53.204411 | 4.679105  | 65.437252 |
| H | 57.097957 | 5.122307  | 65.488091 | H | 57.038393 | 5.074832  | 65.883698 | H | 57.226960 | 5.075628  | 65.379418 |
| H | 56.027753 | 6.403062  | 65.929706 | H | 55.998355 | 6.447056  | 65.859928 | H | 56.221469 | 6.376151  | 65.924662 |
| H | 58.167496 | 2.811356  | 61.316582 | H | 57.847178 | 2.725389  | 61.219347 | H | 58.195038 | 2.823374  | 61.329403 |
| H | 56.603717 | 3.338976  | 61.974171 | H | 56.651089 | 3.555249  | 62.233013 | H | 56.605157 | 3.318250  | 61.950146 |
| H | 58.123818 | 3.948953  | 62.670410 | H | 58.390404 | 3.809015  | 62.505729 | H | 58.096476 | 3.960597  | 62.681472 |
| H | 58.603696 | 5.148024  | 60.447386 | H | 58.548683 | 4.947458  | 60.212775 | H | 58.604041 | 5.161892  | 60.464628 |
| H | 57.084578 | 4.525146  | 59.807129 | H | 56.828781 | 4.654446  | 59.956853 | H | 57.107065 | 4.515441  | 59.798616 |
| H | 55.912472 | 5.679607  | 61.808670 | H | 56.334788 | 5.991577  | 62.051831 | H | 55.907674 | 5.659690  | 61.816664 |
| H | 56.498301 | 6.742532  | 60.523981 | H | 57.017405 | 6.960518  | 60.714341 | H | 56.433327 | 6.701087  | 60.489525 |
| H | 58.344901 | 7.528018  | 61.832537 | H | 59.031901 | 7.347428  | 61.858582 | H | 58.271506 | 7.593321  | 61.735783 |
| H | 58.271522 | 6.150822  | 62.951823 | H | 58.956440 | 5.813185  | 62.748948 | H | 58.279595 | 6.242509  | 62.888865 |
| H | 56.103835 | 8.195718  | 62.753815 | H | 57.257125 | 8.203234  | 63.328497 | H | 56.039319 | 8.226948  | 62.716044 |
| H | 57.344756 | 8.298085  | 63.810429 | H | 58.584121 | 7.745817  | 64.149879 | H | 57.298442 | 8.365605  | 63.737468 |
| H | 52.429025 | 3.078386  | 58.558763 | H | 51.424850 | 2.855409  | 59.188310 | H | 52.330249 | 2.961828  | 58.660309 |
| H | 51.704182 | 4.684838  | 58.334150 | H | 52.541544 | 3.824606  | 58.206290 | H | 51.864052 | 4.628265  | 58.262323 |
| H | 50.845566 | 3.446116  | 59.272600 | H | 51.014122 | 4.532493  | 58.772136 | H | 50.785566 | 3.615612  | 59.245236 |
| H | 53.509030 | 4.786319  | 60.057754 | H | 53.313864 | 3.645614  | 60.631139 | H | 53.587940 | 4.579542  | 60.114546 |
| H | 52.743582 | 3.507927  | 60.989118 | H | 51.795015 | 4.386466  | 61.143919 | H | 52.527970 | 3.549074  | 61.069136 |
| H | 50.824441 | 4.933816  | 61.531058 | H | 52.439487 | 6.400574  | 59.616581 | H | 50.781237 | 5.414808  | 61.043758 |
| H | 51.341793 | 6.170596  | 60.379688 | H | 54.057019 | 5.688755  | 59.542164 | H | 51.969730 | 6.451663  | 60.238397 |

|   |           |           |           |   |           |           |           |   |           |           |           |
|---|-----------|-----------|-----------|---|-----------|-----------|-----------|---|-----------|-----------|-----------|
| H | 53.324515 | 6.709440  | 61.733982 | H | 54.117525 | 5.777078  | 62.113765 | H | 53.530797 | 6.152379  | 62.203368 |
| H | 53.011766 | 5.338520  | 62.819676 | H | 52.531986 | 6.568777  | 62.062052 | H | 52.306774 | 5.129160  | 62.992864 |
| H | 51.406166 | 7.819857  | 62.574455 | H | 55.117030 | 7.640699  | 61.109052 | H | 52.074902 | 8.021152  | 62.307628 |
| H | 52.347720 | 7.308893  | 63.918199 | H | 54.002436 | 8.378636  | 62.109701 | H | 52.191884 | 7.368604  | 63.829581 |
| H | 57.852218 | 10.958180 | 67.409475 | H | 57.565377 | 10.863314 | 66.855706 | H | 58.065276 | 10.581547 | 67.472625 |
| H | 51.569719 | 11.738763 | 66.439205 | H | 51.363705 | 10.711067 | 65.293865 | H | 51.764660 | 11.699692 | 66.876665 |
| H | 52.327078 | 9.393662  | 60.472562 | H | 52.952790 | 10.499522 | 59.132561 | H | 52.118698 | 9.619580  | 60.812752 |
| H | 58.590830 | 10.263761 | 61.055668 | H | 59.115035 | 9.914489  | 60.718324 | H | 58.455975 | 10.363538 | 61.054601 |
| H | 56.652364 | 10.406820 | 69.426263 | H | 56.365381 | 10.966273 | 68.798201 | H | 56.983097 | 10.050132 | 69.547181 |
| H | 55.197473 | 9.464844  | 68.962875 | H | 55.161483 | 9.678216  | 68.460739 | H | 55.425373 | 9.228201  | 69.198960 |
| H | 55.068494 | 10.791414 | 70.138550 | H | 54.686679 | 11.141070 | 69.352128 | H | 55.500459 | 10.527938 | 70.405496 |
| H | 55.664080 | 13.575056 | 67.631381 | H | 54.843681 | 13.504449 | 66.440210 | H | 56.073836 | 13.331484 | 67.926426 |
| H | 55.148765 | 13.274384 | 69.284458 | H | 54.622055 | 13.394150 | 68.184387 | H | 55.640985 | 13.021354 | 69.600007 |
| H | 53.095728 | 11.898479 | 68.452527 | H | 52.669661 | 11.640035 | 67.386680 | H | 53.444643 | 11.798302 | 68.889617 |
| H | 50.484069 | 8.683562  | 64.953735 | H | 51.179447 | 7.912966  | 62.827562 | H | 50.575151 | 8.818558  | 65.399198 |
| H | 48.948217 | 9.379548  | 64.343748 | H | 49.530319 | 8.462174  | 62.420541 | H | 49.035821 | 9.628147  | 64.980744 |
| H | 49.663587 | 9.973799  | 65.866266 | H | 50.137014 | 8.603082  | 64.096739 | H | 49.949404 | 10.144291 | 66.421694 |
| H | 50.408928 | 12.785605 | 63.549291 | H | 50.203294 | 12.140483 | 62.835257 | H | 50.593218 | 12.921665 | 63.997439 |
| H | 49.788541 | 12.361060 | 65.139851 | H | 49.682859 | 11.116536 | 64.169886 | H | 50.053623 | 12.544974 | 65.628853 |
| H | 50.213584 | 10.145876 | 61.902019 | H | 50.713518 | 10.174246 | 60.445388 | H | 50.165084 | 10.192763 | 62.425648 |
| H | 54.323938 | 9.016625  | 58.953789 | H | 55.189544 | 10.312579 | 57.784724 | H | 54.049951 | 9.284787  | 59.090727 |
| H | 56.978091 | 9.533304  | 59.132799 | H | 57.800002 | 9.973127  | 58.460926 | H | 56.721349 | 9.760511  | 59.148753 |
| H | 60.288166 | 10.465394 | 63.116211 | H | 60.457072 | 9.897063  | 62.986481 | H | 60.228176 | 10.439202 | 63.029917 |
| H | 59.964745 | 10.612554 | 65.815659 | H | 59.771242 | 10.164342 | 65.612697 | H | 60.042806 | 10.370030 | 65.743463 |
| H | 52.458635 | 12.762966 | 62.405957 | H | 52.404173 | 12.790762 | 62.396719 | H | 52.555712 | 12.731875 | 62.411538 |
| H | 53.480146 | 13.321946 | 64.673159 | H | 53.869692 | 13.126048 | 64.446706 | H | 53.248724 | 13.405365 | 64.741589 |
| H | 54.287792 | 14.714469 | 63.951371 | H | 54.541204 | 14.587704 | 63.718346 | H | 54.004633 | 14.870579 | 64.098266 |
| H | 50.611438 | 7.759963  | 69.406059 | H | 50.580108 | 7.762854  | 69.415050 | H | 50.839915 | 7.797595  | 69.504841 |
| H | 56.305522 | 3.035285  | 65.166282 | H | 56.304719 | 3.020334  | 65.274535 | H | 56.314619 | 3.012451  | 65.138716 |
| H | 56.337833 | 6.962367  | 63.920500 | H | 57.246738 | 6.712538  | 64.149360 | H | 56.342153 | 7.001056  | 63.880918 |
| H | 50.898375 | 6.484614  | 63.411895 | H | 53.705740 | 8.251864  | 60.513296 | H | 50.808134 | 7.099886  | 62.911021 |
| H | 51.987851 | 14.389913 | 62.953946 | H | 52.082189 | 14.351534 | 63.184734 | H | 51.917998 | 14.342559 | 62.819269 |
| H | 53.252032 | 14.189900 | 61.717973 | H | 53.059893 | 14.281410 | 61.698426 | H | 53.335618 | 14.184829 | 61.756968 |
| O | 53.291769 | 7.768327  | 65.026903 | O | 53.067646 | 7.817038  | 65.152318 | O | 53.321087 | 8.034411  | 65.217191 |
| H | 53.266717 | 9.292502  | 64.169216 | H | 52.815834 | 8.641214  | 64.657794 | H | 53.380350 | 8.934733  | 64.742782 |
| H | 52.700744 | 8.028120  | 65.766242 | H | 52.556043 | 7.927589  | 65.996374 | H | 52.872819 | 8.251022  | 66.082633 |
| O | 55.411840 | 7.944319  | 66.528809 | O | 55.421387 | 7.958430  | 66.439540 | O | 55.714180 | 7.867378  | 66.672251 |
| H | 54.633990 | 8.054600  | 65.878972 | H | 54.636720 | 8.143645  | 65.852846 | H | 55.002653 | 8.239625  | 66.097192 |
| H | 55.890677 | 8.799890  | 66.571774 | H | 55.974443 | 8.779074  | 66.397173 | H | 56.351468 | 8.617374  | 66.800061 |
| H | 51.967365 | 1.299718  | 63.795494 | H | 51.932919 | 1.344826  | 63.863185 | H | 52.015529 | 1.293998  | 63.808506 |

**Heme (Fe<sup>3+</sup>) without SO<sub>3</sub><sup>2-</sup>**

| <b>S=1/2</b> |           |          | <b>S=3/2</b> |   |           | <b>S=5/2</b> |           |   |           |           |           |
|--------------|-----------|----------|--------------|---|-----------|--------------|-----------|---|-----------|-----------|-----------|
| C            | 50.331000 | 4.395000 | 71.629000    | C | 50.331000 | 4.395000     | 71.629000 | C | 50.331000 | 4.395000  | 71.629000 |
| C            | 50.229381 | 5.480101 | 70.556138    | C | 50.217905 | 5.435125     | 70.515931 | C | 50.377646 | 5.923947  | 71.577861 |
| C            | 51.600703 | 5.992336 | 70.120590    | C | 51.588720 | 5.953727     | 70.098080 | C | 51.707701 | 6.471507  | 72.112809 |
| N            | 51.447148 | 7.053763 | 69.119429    | N | 51.454752 | 7.004660     | 69.083153 | N | 51.805441 | 7.924247  | 72.096124 |
| C            | 52.433187 | 7.579771 | 68.395975    | C | 52.463004 | 7.525248     | 68.399847 | C | 51.453417 | 8.720702  | 73.104834 |
| N            | 53.698343 | 7.194871 | 68.593829    | N | 53.717313 | 7.141570     | 68.620771 | N | 50.873807 | 8.211387  | 74.216581 |
| N            | 52.158994 | 8.456399 | 67.400380    | N | 52.227908 | 8.440062     | 67.400665 | N | 51.721321 | 10.026446 | 73.024227 |
| C            | 52.225000 | 2.268000 | 63.346000    | C | 52.225000 | 2.268000     | 63.346000 | C | 52.225000 | 2.268000  | 63.346000 |
| C            | 53.663825 | 2.765401 | 63.482789    | C | 53.711694 | 2.624275     | 63.405682 | C | 53.702968 | 2.633259  | 63.446589 |
| C            | 54.173821 | 2.632214 | 64.924066    | C | 54.262769 | 2.498599     | 64.835223 | C | 54.274811 | 2.367169  | 64.845489 |
| N            | 55.385901 | 3.419848 | 65.188237    | N | 55.476561 | 3.289647     | 65.077821 | N | 55.574019 | 3.015567  | 65.052469 |
| C            | 55.379622 | 4.738472 | 65.351104    | C | 55.456660 | 4.603077     | 65.281003 | C | 55.715146 | 4.344721  | 65.127071 |
| N            | 54.240773 | 5.424816 | 65.350064    | N | 54.310505 | 5.276928     | 65.260564 | N | 54.652541 | 5.121718  | 65.353728 |
| N            | 56.552988 | 5.436956 | 65.488546    | N | 56.614254 | 5.309509     | 65.470305 | N | 56.917460 | 4.913844  | 64.967152 |
| C            | 57.624000 | 3.668000 | 61.733000    | C | 57.624000 | 3.668000     | 61.733000 | C | 57.624000 | 3.668000  | 61.733000 |
| C            | 57.584000 | 4.849000 | 60.729000    | C | 57.584000 | 4.849000     | 60.729000 | C | 57.584000 | 4.849000  | 60.729000 |



|    |           |           |           |    |           |           |           |    |           |           |           |
|----|-----------|-----------|-----------|----|-----------|-----------|-----------|----|-----------|-----------|-----------|
| C  | 57.274311 | 6.172269  | 61.453558 | C  | 57.195837 | 6.156760  | 61.434110 | C  | 57.837260 | 6.208206  | 61.408566 |
| C  | 58.434106 | 6.641351  | 62.333329 | C  | 58.329591 | 6.676982  | 62.318085 | C  | 59.292850 | 6.357737  | 61.837968 |
| N  | 57.935072 | 7.327121  | 63.574540 | N  | 57.796207 | 7.335614  | 63.554474 | N  | 59.496698 | 7.559986  | 62.709201 |
| C  | 51.838000 | 3.862000  | 59.049000 | C  | 51.838000 | 3.862000  | 59.049000 | C  | 51.838000 | 3.862000  | 59.049000 |
| C  | 52.531000 | 4.355000  | 60.326000 | C  | 52.531000 | 4.355000  | 60.326000 | C  | 52.531000 | 4.355000  | 60.326000 |
| C  | 52.966076 | 5.819170  | 60.275219 | C  | 52.563314 | 5.870700  | 60.539031 | C  | 53.274950 | 5.681076  | 60.134741 |
| C  | 53.486339 | 6.218702  | 61.641169 | C  | 53.080971 | 6.140634  | 61.943425 | C  | 53.892538 | 6.113550  | 61.449662 |
| N  | 53.906974 | 7.652227  | 61.711301 | N  | 53.156778 | 7.594990  | 62.280696 | N  | 54.576278 | 7.446346  | 61.383723 |
| Fe | 55.237434 | 10.650341 | 63.070670 | Fe | 55.014178 | 10.588445 | 63.312995 | Fe | 55.381660 | 10.658697 | 63.440700 |
| C  | 56.987275 | 10.628106 | 66.014554 | C  | 56.987643 | 10.375780 | 66.130583 | C  | 58.631158 | 10.460966 | 62.336795 |
| C  | 52.293524 | 10.640736 | 64.814187 | C  | 52.240783 | 10.929988 | 65.302093 | C  | 56.495376 | 10.619877 | 66.698515 |
| C  | 53.526908 | 10.527413 | 60.122479 | C  | 53.004829 | 10.252546 | 60.551925 | C  | 52.184484 | 9.971792  | 64.583246 |
| C  | 58.186827 | 10.163923 | 61.346317 | C  | 57.783497 | 10.109004 | 61.333450 | C  | 54.261847 | 10.371889 | 60.209831 |
| N  | 54.767543 | 10.728139 | 65.010721 | N  | 54.692144 | 10.596227 | 65.326231 | N  | 57.209342 | 10.539557 | 64.317393 |
| C  | 55.635092 | 10.901187 | 66.059872 | C  | 55.663489 | 10.678418 | 66.308096 | C  | 58.422953 | 10.667576 | 63.676833 |
| C  | 54.941979 | 11.431358 | 67.301868 | C  | 55.115381 | 11.252189 | 67.606327 | C  | 59.528604 | 11.082918 | 64.639748 |
| C  | 55.261926 | 10.704045 | 68.617369 | C  | 55.449525 | 10.484360 | 68.893195 | C  | 60.695699 | 10.076156 | 64.734252 |
| C  | 55.250881 | 12.969193 | 67.432106 | C  | 55.568789 | 12.761088 | 67.711778 | C  | 60.042476 | 12.530510 | 64.318877 |
| C  | 56.668852 | 13.418117 | 67.894029 | C  | 57.058073 | 13.076846 | 68.074447 | C  | 61.001737 | 12.729972 | 63.101926 |
| O  | 57.567929 | 12.554797 | 68.106895 | O  | 57.864452 | 12.143926 | 68.329052 | O  | 61.308360 | 11.756259 | 62.361385 |
| O  | 56.765069 | 14.667264 | 68.008308 | O  | 57.277115 | 14.315502 | 68.073185 | O  | 61.384288 | 13.924677 | 63.000647 |
| C  | 53.517661 | 11.295115 | 66.881672 | C  | 53.667320 | 11.304936 | 67.285399 | C  | 58.768000 | 11.149640 | 65.909776 |
| C  | 53.457510 | 10.927682 | 65.567041 | C  | 53.480648 | 10.993769 | 65.953070 | C  | 57.444149 | 10.832768 | 65.686179 |
| N  | 53.357429 | 10.459449 | 62.614363 | N  | 53.058601 | 10.507916 | 63.037379 | N  | 54.559745 | 10.195219 | 65.279140 |
| C  | 52.270352 | 10.393494 | 63.481337 | C  | 52.064403 | 10.619690 | 63.985712 | C  | 55.199994 | 10.231547 | 66.492234 |
| C  | 50.977207 | 10.041612 | 62.744830 | C  | 50.674084 | 10.383974 | 63.415424 | C  | 54.296042 | 9.740556  | 67.615796 |
| C  | 50.531292 | 8.604588  | 63.111805 | C  | 50.051534 | 9.113359  | 64.043831 | C  | 54.801354 | 8.314057  | 67.996351 |
| C  | 49.830024 | 11.040507 | 63.053018 | C  | 49.747364 | 11.605058 | 63.661962 | C  | 54.276789 | 10.657496 | 68.855301 |
| C  | 48.476795 | 10.688447 | 62.383049 | C  | 48.310115 | 11.478457 | 63.084558 | C  | 53.369988 | 10.193683 | 70.009923 |
| O  | 47.458440 | 11.021892 | 63.049061 | O  | 47.490715 | 12.298417 | 63.582214 | O  | 53.478493 | 10.855427 | 71.083869 |
| O  | 48.506273 | 10.129241 | 61.250650 | O  | 48.092980 | 10.616206 | 62.189167 | O  | 52.587392 | 9.212004  | 69.825088 |
| C  | 51.436564 | 10.148977 | 61.336194 | C  | 51.003098 | 10.219082 | 61.977867 | C  | 52.990592 | 9.679404  | 66.903837 |
| C  | 52.784626 | 10.404176 | 61.314567 | C  | 52.364339 | 10.339563 | 61.798703 | C  | 53.187749 | 9.952141  | 65.563699 |
| N  | 55.740980 | 10.352042 | 61.174281 | N  | 55.314466 | 10.135212 | 61.399470 | N  | 53.617829 | 10.303264 | 62.592380 |
| C  | 54.886577 | 10.484115 | 60.058402 | C  | 54.362761 | 10.159778 | 60.375279 | C  | 52.388126 | 10.164029 | 63.228739 |
| C  | 55.648127 | 10.463705 | 58.833473 | C  | 55.003437 | 10.051695 | 59.089403 | C  | 51.325809 | 10.179233 | 62.256869 |
| C  | 56.951478 | 10.309118 | 59.181568 | C  | 56.345795 | 10.000699 | 59.312970 | C  | 51.903150 | 10.314764 | 61.025054 |
| C  | 57.003755 | 10.257650 | 60.624483 | C  | 56.544962 | 10.070536 | 60.734000 | C  | 53.321892 | 10.375907 | 61.227606 |
| N  | 57.142651 | 10.272306 | 63.575159 | N  | 56.952855 | 10.213121 | 63.651996 | N  | 56.256692 | 10.320738 | 61.661741 |
| C  | 58.253921 | 10.178572 | 62.720259 | C  | 57.987074 | 10.170928 | 62.704383 | C  | 55.631655 | 10.282546 | 60.410470 |
| C  | 59.468610 | 10.097071 | 63.484989 | C  | 59.254948 | 10.093130 | 63.353734 | C  | 56.609062 | 10.146727 | 59.375173 |
| C  | 59.116259 | 10.172938 | 64.803935 | C  | 59.012677 | 10.078188 | 64.710170 | C  | 57.838883 | 10.129819 | 59.986888 |
| C  | 57.686287 | 10.326374 | 64.853418 | C  | 57.598879 | 10.188245 | 64.885109 | C  | 57.608234 | 10.270753 | 61.395247 |
| C  | 52.837000 | 13.766000 | 62.641000 | C  | 52.837000 | 13.766000 | 62.641000 | C  | 52.837000 | 13.766000 | 62.641000 |
| C  | 54.028733 | 13.637571 | 63.581811 | C  | 53.891141 | 13.597200 | 63.722757 | C  | 53.610035 | 13.416925 | 63.908367 |
| S  | 55.460518 | 12.779533 | 62.849896 | S  | 55.370272 | 12.670661 | 63.206765 | S  | 55.345125 | 12.929930 | 63.559917 |
| H  | 54.243321 | 6.450352  | 65.248417 | H  | 54.280695 | 6.309955  | 65.282613 | H  | 54.668703 | 6.116558  | 65.090832 |
| H  | 49.332395 | 4.047214  | 71.917880 | H  | 49.339873 | 4.020590  | 71.909255 | H  | 49.375177 | 4.017846  | 71.244868 |
| H  | 50.830459 | 4.773234  | 72.530816 | H  | 50.794924 | 4.825110  | 72.525895 | H  | 50.445698 | 4.029835  | 72.659095 |
| H  | 50.898044 | 3.527044  | 71.265526 | H  | 50.937082 | 3.535905  | 71.311917 | H  | 51.135956 | 3.952131  | 71.025337 |
| H  | 49.698075 | 5.093199  | 69.674176 | H  | 49.713081 | 5.005220  | 69.639074 | H  | 50.243262 | 6.276888  | 70.544440 |
| H  | 49.641653 | 6.327841  | 70.940068 | H  | 49.605748 | 6.282322  | 70.859048 | H  | 49.543427 | 6.346015  | 72.159272 |
| H  | 52.152150 | 6.381901  | 70.990790 | H  | 52.123145 | 6.360274  | 70.970906 | H  | 51.888984 | 6.108027  | 73.135209 |
| H  | 52.191097 | 5.176464  | 69.678102 | H  | 52.193680 | 5.137858  | 69.675521 | H  | 52.534607 | 6.088489  | 71.499969 |
| H  | 54.461605 | 7.527268  | 67.999965 | H  | 54.498760 | 7.430710  | 68.020251 | H  | 50.571946 | 8.846195  | 74.945072 |
| H  | 53.946919 | 6.686361  | 69.433728 | H  | 53.938190 | 6.571719  | 69.428756 | H  | 50.381119 | 7.328947  | 74.161561 |
| H  | 52.813108 | 9.239907  | 67.252083 | H  | 52.810424 | 9.295119  | 67.457893 | H  | 51.394101 | 10.650047 | 73.750370 |
| H  | 51.185524 | 8.728358  | 67.296673 | H  | 51.246784 | 8.688179  | 67.283515 | H  | 52.373259 | 10.383365 | 72.277317 |

|   |           |           |           |   |           |           |           |   |           |           |           |
|---|-----------|-----------|-----------|---|-----------|-----------|-----------|---|-----------|-----------|-----------|
| H | 51.901300 | 2.287514  | 62.300362 | H | 51.868804 | 2.219831  | 62.312213 | H | 51.850855 | 2.414653  | 62.327155 |
| H | 51.532978 | 2.890152  | 63.929404 | H | 51.615327 | 3.005837  | 63.885663 | H | 51.619004 | 2.885736  | 64.022802 |
| H | 53.718032 | 3.819489  | 63.175693 | H | 53.863961 | 3.650805  | 63.045711 | H | 53.829808 | 3.699728  | 63.211110 |
| H | 54.335191 | 2.211338  | 62.813347 | H | 54.293850 | 1.977243  | 62.738068 | H | 54.296378 | 2.074980  | 62.709242 |
| H | 54.418327 | 1.591507  | 65.155883 | H | 54.513578 | 1.459202  | 65.064691 | H | 54.424364 | 1.295956  | 65.012648 |
| H | 53.397514 | 2.931379  | 65.644666 | H | 53.502538 | 2.797081  | 65.573540 | H | 53.575000 | 2.697045  | 65.627828 |
| H | 53.355933 | 4.941419  | 65.258961 | H | 53.433776 | 4.779916  | 65.166122 | H | 53.749942 | 4.696097  | 65.520213 |
| H | 57.360354 | 4.860229  | 65.719034 | H | 57.432130 | 4.741612  | 65.683422 | H | 57.727000 | 4.341736  | 64.765630 |
| H | 56.477399 | 6.269156  | 66.108497 | H | 56.514703 | 6.121092  | 66.114638 | H | 57.056673 | 5.917501  | 65.109199 |
| H | 57.834988 | 2.723500  | 61.218343 | H | 57.899642 | 2.732723  | 61.231731 | H | 57.497115 | 2.713191  | 61.209734 |
| H | 56.654351 | 3.562990  | 62.241280 | H | 56.635644 | 3.524524  | 62.193203 | H | 56.811193 | 3.757734  | 62.464870 |
| H | 58.399106 | 3.802233  | 62.498709 | H | 58.354004 | 3.835250  | 62.536411 | H | 58.576733 | 3.619713  | 62.275021 |
| H | 58.539756 | 4.933130  | 60.194144 | H | 58.558932 | 4.966964  | 60.236161 | H | 58.325592 | 4.694975  | 59.933137 |
| H | 56.811223 | 4.667213  | 59.971724 | H | 56.853525 | 4.634980  | 59.938592 | H | 56.604301 | 4.869994  | 60.232018 |
| H | 56.393443 | 6.002736  | 62.097579 | H | 56.310619 | 5.956442  | 62.064379 | H | 57.189277 | 6.297755  | 62.297350 |
| H | 57.015014 | 6.965142  | 60.737186 | H | 56.903382 | 6.933533  | 60.714931 | H | 57.592139 | 7.035637  | 60.723082 |
| H | 59.084235 | 7.350592  | 61.813807 | H | 58.945418 | 7.417974  | 61.800889 | H | 59.949780 | 6.466511  | 60.970003 |
| H | 59.044820 | 5.803313  | 62.681093 | H | 58.980881 | 5.868863  | 62.664242 | H | 59.632589 | 5.495524  | 62.419639 |
| H | 57.360962 | 8.166864  | 63.360562 | H | 57.136995 | 8.105171  | 63.332718 | H | 59.210980 | 8.454555  | 62.255995 |
| H | 58.718743 | 7.689636  | 64.137866 | H | 58.548897 | 7.801033  | 64.090169 | H | 60.482592 | 7.667528  | 62.971468 |
| H | 51.549263 | 2.808858  | 59.147630 | H | 51.854991 | 2.766069  | 59.005233 | H | 51.318506 | 2.913305  | 59.229100 |
| H | 52.500465 | 3.951059  | 58.177796 | H | 52.336583 | 4.244339  | 58.148052 | H | 52.565678 | 3.701473  | 58.242445 |
| H | 50.930629 | 4.445321  | 58.845710 | H | 50.789858 | 4.188641  | 59.018763 | H | 51.097444 | 4.591928  | 58.696446 |
| H | 53.408769 | 3.724486  | 60.536387 | H | 53.562569 | 3.970271  | 60.353918 | H | 53.243433 | 3.591815  | 60.673906 |
| H | 51.842339 | 4.228298  | 61.174798 | H | 52.014156 | 3.909032  | 61.187442 | H | 51.785177 | 4.478744  | 61.125606 |
| H | 52.111544 | 6.459618  | 60.008814 | H | 51.553173 | 6.294024  | 60.435863 | H | 52.575284 | 6.456533  | 59.787774 |
| H | 53.741599 | 5.970599  | 59.509914 | H | 53.205138 | 6.361109  | 59.792334 | H | 54.053087 | 5.575564  | 59.364356 |
| H | 54.353929 | 5.616888  | 61.936950 | H | 54.090087 | 5.731976  | 62.081966 | H | 54.644259 | 5.395771  | 61.801723 |
| H | 52.709423 | 6.092755  | 62.405026 | H | 52.420062 | 5.686429  | 62.690581 | H | 53.124450 | 6.206800  | 62.224573 |
| H | 54.750730 | 7.855016  | 61.160340 | H | 53.879018 | 8.090987  | 61.733528 | H | 55.449479 | 7.418793  | 60.845648 |
| H | 54.069778 | 7.932634  | 62.710572 | H | 53.351729 | 7.755597  | 63.304451 | H | 54.769769 | 7.757505  | 62.365156 |
| H | 57.552293 | 10.840359 | 66.923233 | H | 57.636877 | 10.528112 | 66.993744 | H | 59.650515 | 10.630365 | 61.978165 |
| H | 51.344962 | 10.662452 | 65.346436 | H | 51.356455 | 11.129018 | 65.904247 | H | 56.847327 | 10.719386 | 67.722671 |
| H | 52.964690 | 10.585360 | 59.192715 | H | 52.368760 | 10.218732 | 59.670090 | H | 51.160868 | 9.830252  | 64.923462 |
| H | 59.119864 | 10.109316 | 60.788945 | H | 58.660303 | 10.080525 | 60.689247 | H | 53.898059 | 10.396511 | 59.184111 |
| H | 56.324894 | 10.802727 | 68.858099 | H | 56.531993 | 10.455537 | 69.047900 | H | 61.195641 | 9.996434  | 63.763777 |
| H | 54.985814 | 9.644190  | 68.564793 | H | 55.043887 | 9.466483  | 68.864866 | H | 60.337413 | 9.097622  | 65.080814 |
| H | 54.684120 | 11.163213 | 69.429282 | H | 54.998040 | 11.003843 | 69.747804 | H | 61.429359 | 10.438961 | 65.464760 |
| H | 55.058200 | 13.455342 | 66.466529 | H | 55.355725 | 13.262715 | 66.758870 | H | 59.178310 | 13.190875 | 64.166509 |
| H | 54.522724 | 13.389118 | 68.139667 | H | 54.940176 | 13.245738 | 68.470975 | H | 60.567677 | 12.902724 | 65.209001 |
| H | 52.667226 | 11.599279 | 67.485821 | H | 52.894929 | 11.681938 | 67.950212 | H | 59.201121 | 11.379139 | 66.878773 |
| H | 51.340877 | 7.877310  | 62.952503 | H | 50.726345 | 8.249494  | 63.961167 | H | 54.874205 | 7.679950  | 67.103695 |
| H | 49.677615 | 8.313726  | 62.491215 | H | 49.110789 | 8.887405  | 63.532053 | H | 54.100212 | 7.864162  | 68.704187 |
| H | 50.240026 | 8.565304  | 64.169541 | H | 49.842939 | 9.287006  | 65.108189 | H | 55.795095 | 8.386456  | 68.456258 |
| H | 50.121929 | 12.046399 | 62.719235 | H | 50.200536 | 12.503487 | 63.220758 | H | 53.955124 | 11.667727 | 68.566210 |
| H | 49.682289 | 11.092744 | 64.139159 | H | 49.667931 | 11.789121 | 64.741879 | H | 55.292530 | 10.760060 | 69.261430 |
| H | 50.772071 | 10.069488 | 60.482751 | H | 50.258942 | 10.092157 | 61.199698 | H | 52.045158 | 9.438991  | 67.376188 |
| H | 55.212956 | 10.541757 | 57.842776 | H | 54.472684 | 10.032605 | 58.143101 | H | 50.272073 | 10.089608 | 62.500683 |
| H | 57.822541 | 10.245478 | 58.537351 | H | 57.150301 | 9.933702  | 58.587485 | H | 51.420087 | 10.362190 | 60.054247 |
| H | 60.461424 | 10.019231 | 63.053304 | H | 60.209684 | 10.052277 | 62.839138 | H | 56.381894 | 10.095473 | 58.315116 |
| H | 59.760480 | 10.181742 | 65.677285 | H | 59.729420 | 10.054440 | 65.524593 | H | 58.820795 | 10.073976 | 59.527749 |
| H | 52.430373 | 12.786547 | 62.375589 | H | 52.447526 | 12.802512 | 62.302468 | H | 52.782986 | 12.904738 | 61.964407 |
| H | 53.749273 | 13.143391 | 64.519380 | H | 53.479919 | 13.121087 | 64.621639 | H | 53.124222 | 12.602810 | 64.458975 |
| H | 54.429721 | 14.626994 | 63.848585 | H | 54.300153 | 14.570003 | 64.034663 | H | 53.673374 | 14.281497 | 64.581683 |
| H | 50.529863 | 7.483573  | 69.039146 | H | 50.539775 | 7.434006  | 68.974997 | H | 52.123742 | 8.410082  | 71.216396 |
| H | 56.268739 | 2.929548  | 65.287026 | H | 56.360821 | 2.802217  | 65.177995 | H | 56.412495 | 2.450550  | 64.975905 |
| H | 57.380246 | 6.665864  | 64.160263 | H | 57.323898 | 6.637060  | 64.164810 | H | 58.930295 | 7.510157  | 63.590744 |
| H | 53.166396 | 8.281674  | 61.344910 | H | 52.270205 | 8.085588  | 62.062990 | H | 53.986719 | 8.177915  | 60.946763 |

|   |           |           |           |   |           |           |           |   |           |           |           |
|---|-----------|-----------|-----------|---|-----------|-----------|-----------|---|-----------|-----------|-----------|
| H | 52.040921 | 14.345601 | 63.128228 | H | 51.998941 | 14.359373 | 63.031196 | H | 51.810973 | 14.066337 | 62.898485 |
| H | 53.120627 | 14.280772 | 61.714921 | H | 53.248674 | 14.289754 | 61.769467 | H | 53.314983 | 14.594117 | 62.102744 |
| O | 54.064547 | 8.052360  | 64.509788 | O | 53.752255 | 7.950645  | 65.006216 | O | 54.460586 | 7.625013  | 64.151983 |
| H | 54.530756 | 8.915735  | 64.710065 | H | 54.216450 | 8.835945  | 65.072271 | H | 54.762673 | 8.479538  | 64.564630 |
| H | 53.128893 | 8.316884  | 64.661263 | H | 53.017428 | 8.036292  | 65.668464 | H | 53.488035 | 7.732631  | 64.194100 |
| O | 56.265172 | 7.800932  | 67.085334 | O | 56.240180 | 7.589334  | 67.164098 | O | 57.717475 | 7.743054  | 64.929244 |
| H | 56.448565 | 8.700305  | 66.713836 | H | 56.424734 | 8.496591  | 66.802319 | H | 57.360583 | 8.636183  | 64.678871 |
| H | 56.865271 | 7.749115  | 67.853049 | H | 56.855130 | 7.512672  | 67.917553 | H | 58.132042 | 7.895993  | 65.798676 |
| H | 52.129119 | 1.233807  | 63.702361 | H | 52.038045 | 1.286518  | 63.801428 | H | 52.056527 | 1.215995  | 63.612680 |

**Heme (Fe<sup>2+</sup>) without NO<sub>2</sub><sup>-</sup>**

| S=0 |           |            | S=1       |    |           | S=2        |           |    |           |            |           |
|-----|-----------|------------|-----------|----|-----------|------------|-----------|----|-----------|------------|-----------|
| C   | 50.331000 | -52.045950 | 49.409000 | C  | 50.331000 | -52.045950 | 49.409000 | C  | 50.331000 | -52.045950 | 49.409000 |
| C   | 50.203228 | -50.618862 | 48.883639 | C  | 50.520576 | -50.591588 | 48.980342 | C  | 50.259044 | -50.653773 | 48.793980 |
| C   | 51.427466 | -49.783026 | 49.237149 | C  | 51.816409 | -50.000361 | 49.526892 | C  | 51.532457 | -49.867686 | 49.075537 |
| N   | 51.247922 | -48.408001 | 48.771288 | N  | 51.976330 | -48.624255 | 49.047995 | N  | 51.395067 | -48.495882 | 48.588920 |
| C   | 52.044331 | -47.388613 | 49.097435 | C  | 52.992285 | -47.816947 | 49.354382 | C  | 52.183529 | -47.487441 | 48.959896 |
| N   | 53.165575 | -47.595763 | 49.792516 | N  | 53.953886 | -48.225807 | 50.188894 | N  | 53.297858 | -47.714188 | 49.657104 |
| N   | 51.761877 | -46.145346 | 48.657578 | N  | 53.102615 | -46.605055 | 48.776598 | N  | 51.894844 | -46.228340 | 48.565301 |
| C   | 52.225000 | -47.068010 | 42.455410 | C  | 52.225000 | -47.068010 | 42.455410 | C  | 52.225000 | -47.068010 | 42.455410 |
| C   | 53.250554 | -47.270179 | 43.573955 | C  | 53.537828 | -47.245504 | 43.219361 | C  | 53.304789 | -47.274729 | 43.520563 |
| C   | 52.605986 | -47.333408 | 44.965843 | C  | 53.293837 | -47.722146 | 44.656020 | C  | 52.723750 | -47.414481 | 44.934016 |
| N   | 53.516745 | -47.879272 | 45.981882 | N  | 54.501397 | -48.202282 | 45.330086 | N  | 53.702650 | -47.938087 | 45.896663 |
| C   | 54.532342 | -47.212621 | 46.555002 | C  | 55.450939 | -47.426516 | 45.870307 | C  | 54.699952 | -47.228959 | 46.451361 |
| N   | 54.490720 | -45.890133 | 46.722349 | N  | 55.266920 | -46.120881 | 46.059341 | N  | 54.594913 | -45.913354 | 46.642132 |
| N   | 55.611728 | -47.898170 | 46.963153 | N  | 56.628577 | -47.978739 | 46.210219 | N  | 55.822391 | -47.863542 | 46.821084 |
| C   | 57.624000 | -44.932480 | 42.491060 | C  | 57.624000 | -44.932480 | 42.491060 | C  | 57.624000 | -44.932480 | 42.491060 |
| C   | 57.584000 | -43.404240 | 42.750400 | C  | 57.584000 | -43.404240 | 42.750400 | C  | 57.584000 | -43.404240 | 42.750400 |
| C   | 57.764347 | -43.073118 | 44.242205 | C  | 57.706060 | -43.044912 | 44.240014 | C  | 57.749214 | -43.063413 | 44.240759 |
| C   | 59.175539 | -43.382449 | 44.733492 | C  | 59.055075 | -43.470686 | 44.806837 | C  | 59.158587 | -43.363657 | 44.741115 |
| N   | 59.249677 | -43.357831 | 46.231363 | N  | 59.131802 | -43.236266 | 46.281903 | N  | 59.232303 | -43.288178 | 46.237043 |
| C   | 51.838000 | -42.751710 | 40.914430 | C  | 51.838000 | -42.751710 | 40.914430 | C  | 51.838000 | -42.751710 | 40.914430 |
| C   | 52.531000 | -43.413060 | 42.112930 | C  | 52.531000 | -43.413060 | 42.112930 | C  | 52.531000 | -43.413060 | 42.112930 |
| C   | 53.163418 | -42.459627 | 43.118171 | C  | 52.577434 | -42.540784 | 43.379754 | C  | 53.092921 | -42.439364 | 43.144512 |
| C   | 54.159796 | -43.248920 | 43.947057 | C  | 54.002520 | -42.196678 | 43.791653 | C  | 54.151818 | -43.158999 | 43.957787 |
| N   | 54.543812 | -42.500188 | 45.178029 | N  | 54.008429 | -41.750965 | 45.214785 | N  | 54.508007 | -42.386367 | 45.184454 |
| Fe  | 54.840344 | -41.906206 | 48.898351 | Fe | 55.403854 | -41.172045 | 48.309457 | Fe | 54.826987 | -41.962850 | 49.021558 |
| C   | 57.498564 | -43.463807 | 50.286294 | C  | 57.602555 | -42.899643 | 50.208296 | C  | 57.561679 | -43.646171 | 50.228441 |
| C   | 52.661686 | -43.907415 | 50.624261 | C  | 52.861956 | -43.278035 | 49.155114 | C  | 52.751476 | -44.106215 | 50.699770 |
| C   | 52.127767 | -40.372239 | 47.364000 | C  | 53.204654 | -39.076005 | 46.731705 | C  | 52.088744 | -40.482475 | 47.523727 |
| C   | 56.954486 | -40.147458 | 46.820559 | C  | 58.003877 | -39.704272 | 46.550766 | C  | 56.896192 | -40.117711 | 46.954609 |
| N   | 55.055251 | -43.487497 | 49.985176 | N  | 55.307990 | -42.837904 | 49.368187 | N  | 55.120941 | -43.693300 | 50.049271 |
| C   | 56.246967 | -44.017968 | 50.434495 | C  | 56.304911 | -43.327270 | 50.209719 | C  | 56.323256 | -44.218532 | 50.428594 |
| C   | 56.053198 | -45.327732 | 51.190445 | C  | 55.810715 | -44.469927 | 51.099063 | C  | 56.154802 | -45.534756 | 51.185596 |
| C   | 56.515623 | -46.509598 | 50.294651 | C  | 56.539229 | -45.799239 | 50.792220 | C  | 56.591429 | -46.704494 | 50.263161 |
| C   | 56.741589 | -45.385078 | 52.583406 | C  | 55.895034 | -44.116089 | 52.607958 | C  | 56.886085 | -45.603356 | 52.556188 |
| C   | 58.206444 | -45.896692 | 52.664151 | C  | 57.268615 | -44.103981 | 53.337983 | C  | 58.355217 | -46.112396 | 52.576538 |
| O   | 59.018622 | -45.581341 | 51.740105 | O  | 58.314670 | -44.469565 | 52.722367 | O  | 59.138436 | -45.756589 | 51.643119 |
| O   | 58.473614 | -46.586745 | 53.685233 | O  | 57.198427 | -43.730258 | 54.541030 | O  | 58.652385 | -46.844538 | 53.559168 |
| C   | 54.563801 | -45.322405 | 51.324912 | C  | 54.374001 | -44.526338 | 50.669736 | C  | 54.666797 | -45.536718 | 51.365104 |
| C   | 54.037020 | -44.258556 | 50.640927 | C  | 54.134173 | -43.569208 | 49.720054 | C  | 54.127852 | -44.462272 | 50.704815 |
| N   | 52.810440 | -42.117023 | 48.985363 | N  | 53.441134 | -41.191327 | 48.031879 | N  | 52.866609 | -42.222488 | 49.134746 |
| C   | 52.117476 | -42.894794 | 49.897579 | C  | 52.548792 | -42.121748 | 48.488335 | C  | 52.197129 | -43.068582 | 50.017972 |
| C   | 50.634172 | -42.523167 | 49.970305 | C  | 51.097641 | -41.738128 | 48.194351 | C  | 50.704265 | -42.739025 | 50.107001 |
| C   | 49.712445 | -43.707727 | 49.613380 | C  | 50.400481 | -42.740328 | 47.246041 | C  | 49.810910 | -43.932259 | 49.703130 |
| C   | 50.295634 | -42.004778 | 51.394543 | C  | 50.305879 | -41.650058 | 49.526041 | C  | 50.343377 | -42.286691 | 51.547867 |
| C   | 48.834285 | -41.539850 | 51.626218 | C  | 48.822631 | -41.212036 | 49.415936 | C  | 48.868558 | -41.863168 | 51.783615 |
| O   | 48.494949 | -41.484726 | 52.842226 | O  | 48.125518 | -41.486479 | 50.433973 | O  | 48.519614 | -41.853506 | 52.997774 |
| O   | 48.130098 | -41.239217 | 50.620743 | O  | 48.442983 | -40.622729 | 48.364916 | O  | 48.164033 | -41.548467 | 50.782669 |

C 50.572257 -41.450938 48.934899 C 51.304750 -40.418624 47.535170 C 50.609640 -41.640353 49.106975  
C 51.818633 -41.245677 48.421696 C 52.653419 -40.156017 47.442091 C 51.843275 -41.385345 48.569602  
N 54.598230 -40.664259 47.397454 N 55.559719 -39.801062 46.846849 N 54.548755 -40.678899 47.483676  
C 53.383617 -40.161853 46.868074 C 54.539777 -38.957638 46.399727 C 53.333488 -40.189312 47.007991  
C 53.646023 -39.337913 45.713275 C 55.060953 -38.004784 45.455869 C 53.561882 -39.286387 45.910837  
C 54.998749 -39.285729 45.552419 C 56.397316 -38.258217 45.319182 C 54.920227 -39.189551 45.745058  
C 55.589536 -40.066588 46.613991 C 56.719302 -39.332373 46.215518 C 55.528828 -40.028221 46.741028  
N 56.841154 -41.835384 48.591411 N 57.387400 -41.305272 48.334417 N 56.807699 -41.889232 48.671129  
C 57.544975 -40.924970 47.803875 C 58.320984 -40.560974 47.598835 C 57.487509 -40.921887 47.915867  
C 58.932272 -40.932654 48.158513 C 59.637484 -40.780909 48.112668 C 58.873853 -40.922404 48.264390  
C 59.080529 -41.845954 49.185218 C 59.513996 -41.651528 49.175932 C 59.052738 -41.892934 49.231202  
C 57.791116 -42.400248 49.439144 C 58.127803 -41.974015 49.296432 C 57.782159 -42.498608 49.465181  
C 52.817850 -39.154270 50.828390 C 52.817850 -39.154270 50.828390 C 52.817850 -39.154270 50.828390  
C 53.704783 -40.224300 51.450997 C 53.964051 -40.137985 51.037849 C 53.601140 -40.213592 51.590747  
S 55.234872 -40.528421 50.513976 S 55.391332 -39.788895 49.947663 S 55.214454 -40.574272 50.815435  
H 55.339922 -45.383165 47.008686 H 55.961950 -45.596023 46.611598 H 55.417315 -45.379495 46.962979  
H 49.444443 -52.635793 49.150582 H 49.385459 -52.442563 49.020998 H 49.415772 -52.611728 49.200724  
H 50.437574 -52.058898 50.502156 H 50.310624 -52.138212 50.502693 H 50.450535 -51.990083 50.499634  
H 51.205826 -52.551473 48.978363 H 51.143811 -52.680631 49.031315 H 51.177287 -52.617811 49.004314  
H 50.074183 -50.626531 47.791072 H 50.533680 -50.523008 47.881999 H 50.104418 -50.721186 47.706862  
H 49.310815 -50.138110 49.311819 H 49.676183 -49.981157 49.332523 H 49.403892 -50.102329 49.211873  
H 51.568150 -49.778784 50.329619 H 51.794336 -50.005929 50.627859 H 51.711182 -49.840795 50.160931  
H 52.331173 -50.214695 48.778935 H 52.679781 -50.600609 49.198123 H 52.397803 -50.352174 48.598033  
H 53.680659 -46.787633 50.187736 H 54.683085 -47.578817 50.475303 H 53.789247 -46.927611 50.115443  
H 53.332336 -48.499270 50.218406 H 53.850865 -49.080579 50.720436 H 53.501001 -48.646384 49.996198  
H 52.147161 -45.349113 49.193782 H 53.673198 -45.892562 49.274076 H 52.287557 -45.461241 49.132640  
H 50.818302 -45.983143 48.320891 H 52.283014 -46.240506 48.304007 H 50.934122 -46.053376 48.287442  
H 52.723699 -46.939481 41.487755 H 52.407240 -46.683214 41.445662 H 52.676396 -46.885114 41.473187  
H 51.602987 -46.180583 42.631927 H 51.552129 -46.367306 42.967835 H 51.580627 -46.211871 42.693721  
H 54.001431 -46.466318 43.562923 H 54.109611 -46.305739 43.233732 H 54.026409 -46.443656 43.508989  
H 53.798730 -48.208204 43.403614 H 54.166155 -47.989890 42.709577 H 53.877830 -48.185104 43.290827  
H 51.730327 -47.994421 44.953075 H 52.589877 -48.563207 44.657717 H 51.885192 -48.121205 44.934596  
H 52.246399 -46.349111 45.292584 H 52.831363 -46.933262 45.265411 H 52.326200 -46.460516 45.303823  
H 53.611582 -45.360847 46.729841 H 54.338578 -45.688347 46.027782 H 53.688703 -45.438690 46.677377  
H 55.724434 -48.876198 46.725350 H 56.796626 -48.969166 46.086377 H 55.984556 -48.828781 46.563391  
H 56.215631 -47.524236 47.686637 H 57.296808 -47.458310 46.762821 H 56.457543 -47.446694 47.490534  
H 57.440376 -45.150536 41.432179 H 57.427958 -45.148721 41.433931 H 57.450213 -45.148510 41.430377  
H 56.853287 -45.446925 43.082978 H 56.858949 -45.446830 43.091350 H 56.846105 -45.445461 43.074541  
H 58.596471 -45.366164 42.752479 H 58.600108 -45.367032 42.739524 H 58.592865 -45.368259 42.761960  
H 58.370548 -42.904376 42.166730 H 58.387195 -42.908063 42.186636 H 58.376223 -42.906200 42.172618  
H 56.637405 -42.982149 42.391328 H 56.641028 -42.994082 42.365442 H 56.641323 -42.984078 42.378786  
H 57.066777 -43.702383 44.821225 H 56.904546 -43.551225 44.803604 H 57.046523 -43.686446 44.820745  
H 57.527736 -42.017588 44.443305 H 57.574921 -41.961345 44.384244 H 57.512630 -42.005232 44.428961  
H 59.904667 -42.662422 44.349885 H 59.874674 -42.913785 44.340449 H 59.889969 -42.660041 44.332271  
H 59.485451 -44.386310 44.429983 H 59.233017 -44.539398 44.653232 H 59.464014 -44.378968 44.472407  
H 59.168360 -42.402159 46.639471 H 59.076915 -42.225456 46.532570 H 59.122351 -42.324668 46.612844  
H 60.135217 -43.745985 46.569676 H 60.015394 -43.580224 46.669457 H 60.128642 -43.639346 46.588143  
H 51.409349 -43.510797 40.248809 H 51.841697 -43.417940 40.042411 H 51.450340 -43.509479 40.222281  
H 52.549900 -42.151180 40.332355 H 52.343427 -41.818570 40.629465 H 52.539652 -42.112243 40.361775  
H 51.024385 -42.088543 41.238939 H 50.793457 -42.509166 41.151052 H 50.994328 -42.125710 41.236881  
H 53.311766 -44.089297 41.728557 H 53.554763 -43.696301 41.823290 H 53.352129 -44.043481 41.733817  
H 51.814229 -44.054031 42.646441 H 52.019172 -44.353762 42.344305 H 51.833251 -44.095856 42.618194  
H 52.393591 -42.011572 43.764979 H 52.092326 -43.072843 44.209707 H 52.291301 -42.064933 43.799032  
H 53.682182 -41.632068 42.611875 H 52.006314 -41.612370 43.240285 H 53.545557 -41.564123 42.655379  
H 55.060797 -43.469309 43.370907 H 54.436031 -41.402329 43.176312 H 55.056518 -43.312534 43.365328  
H 53.733509 -44.200708 44.285836 H 54.652741 -43.077843 43.739102 H 53.799389 -44.139274 44.301618  
H 54.565475 -41.474887 45.024904 H 53.315382 -41.001754 45.388712 H 54.451564 -41.359968 45.041870  
H 55.465932 -42.769790 45.535889 H 54.901547 -41.344573 45.556965 H 55.456859 -42.583939 45.517857







|   |           |            |           |   |           |            |           |   |           |            |           |
|---|-----------|------------|-----------|---|-----------|------------|-----------|---|-----------|------------|-----------|
| H | 52.491212 | -44.089962 | 46.902086 | H | 52.527165 | -44.201091 | 47.243241 | H | 52.615965 | -44.179127 | 46.975734 |
| O | 55.784362 | -45.752389 | 48.817299 | O | 55.893362 | -45.931889 | 48.867528 | O | 57.564096 | -44.265134 | 47.519566 |
| H | 55.476829 | -44.849739 | 49.062312 | H | 55.632398 | -45.034287 | 49.186179 | H | 57.188428 | -43.389864 | 47.820232 |
| H | 56.578150 | -45.863171 | 49.376602 | H | 56.703347 | -46.113227 | 49.384208 | H | 57.939107 | -44.604631 | 48.361243 |
| H | 52.042534 | -48.014759 | 41.929524 | H | 52.114077 | -47.991271 | 41.870954 | H | 51.664451 | -47.961556 | 42.761619 |

**Table S10.** Cartesian coordinates (Å) of the ligands optimized at DFT (BP86 functional) using TZ2P basis sets.

| HSO <sub>3</sub> <sup>-</sup> |           |           | SO <sub>3</sub> <sup>2-</sup> |   |           | NO <sub>2</sub> <sup>-</sup> |           |   |           |          |           |
|-------------------------------|-----------|-----------|-------------------------------|---|-----------|------------------------------|-----------|---|-----------|----------|-----------|
| S                             | -1.003479 | 0.582431  | -0.449054                     | S | -1.028630 | 0.625832                     | -0.307931 | N | 0.000000  | 0.000000 | -1.751411 |
| O                             | -1.305684 | 1.179513  | 1.193932                      | O | -1.338123 | 1.240048                     | 1.090069  | O | 1.075220  | 0.000000 | -1.062565 |
| H                             | -2.202889 | 0.834886  | 1.378925                      | O | -2.217503 | -0.330711                    | -0.621951 | O | -1.075220 | 0.000000 | -1.062565 |
| O                             | -2.172122 | -0.359413 | -0.606265                     | O | -1.152233 | 1.801585                     | -1.322470 |   |           |          |           |
| O                             | -1.192430 | 1.819602  | -1.278879                     |   |           |                              |           |   |           |          |           |

**Table S11.** Cartesian coordinates (Å) of the Cub-Siro-Fe<sup>2+/3+</sup> complexes optimized at DFT (BP86 functional) using TZ2P basis sets.

| Cub-Siro-Fe <sup>2+</sup> -HSO <sub>3</sub> <sup>-</sup> |           |           |           |
|----------------------------------------------------------|-----------|-----------|-----------|
| Atom                                                     | X         | Y         | Z         |
| C                                                        | 50.372856 | 4.343387  | 71.657038 |
| C                                                        | 51.307763 | 5.531856  | 71.411271 |
| C                                                        | 51.401943 | 5.889023  | 69.929353 |
| N                                                        | 52.277232 | 7.045851  | 69.732642 |
| C                                                        | 52.775394 | 7.438258  | 68.551577 |
| N                                                        | 52.463540 | 6.751845  | 67.438757 |
| N                                                        | 53.577474 | 8.503436  | 68.468232 |
| C                                                        | 52.284463 | 2.213803  | 63.378748 |
| C                                                        | 53.744039 | 2.584415  | 63.605946 |
| C                                                        | 54.084707 | 2.659679  | 65.098725 |
| N                                                        | 55.403934 | 3.226502  | 65.364307 |
| C                                                        | 55.673780 | 4.528514  | 65.163767 |
| N                                                        | 54.689426 | 5.371186  | 64.867238 |
| N                                                        | 56.933918 | 4.983474  | 65.227952 |
| C                                                        | 57.687141 | 3.612576  | 61.777041 |
| C                                                        | 57.649484 | 4.793301  | 60.772628 |
| C                                                        | 57.512660 | 6.172739  | 61.440485 |
| C                                                        | 58.802723 | 6.700439  | 62.057964 |
| N                                                        | 58.578221 | 8.037176  | 62.696435 |
| C                                                        | 51.906989 | 3.806659  | 59.080477 |
| C                                                        | 52.597297 | 4.299916  | 60.358836 |
| C                                                        | 53.195845 | 5.705510  | 60.227940 |
| C                                                        | 53.750658 | 6.187148  | 61.560221 |
| N                                                        | 54.450400 | 7.500711  | 61.456790 |
| Fe                                                       | 55.436097 | 11.469765 | 64.261460 |
| C                                                        | 58.554462 | 11.268340 | 65.688366 |
| C                                                        | 54.074139 | 12.132161 | 67.262657 |
| C                                                        | 52.378180 | 10.179852 | 63.178283 |



|   |           |           |           |
|---|-----------|-----------|-----------|
| C | 56.801168 | 10.813884 | 61.155400 |
| N | 56.203890 | 11.608585 | 66.194945 |
| C | 57.513809 | 11.427868 | 66.574020 |
| C | 57.599810 | 11.486907 | 68.104059 |
| C | 57.270033 | 10.105987 | 68.718974 |
| C | 58.887546 | 12.071616 | 68.689008 |
| C | 60.149727 | 11.196381 | 68.790760 |
| O | 60.999990 | 11.544408 | 69.641665 |
| O | 60.317901 | 10.191443 | 68.000400 |
| C | 56.369647 | 12.389792 | 68.382856 |
| C | 55.467193 | 12.051840 | 67.235178 |
| N | 53.538007 | 11.123295 | 65.103488 |
| C | 53.189113 | 11.627701 | 66.317361 |
| C | 51.674402 | 11.586012 | 66.513775 |
| C | 51.235798 | 11.227997 | 67.933583 |
| C | 51.112922 | 12.974666 | 66.087610 |
| C | 49.566338 | 13.004796 | 66.133434 |
| O | 49.027876 | 13.524400 | 67.151930 |
| O | 48.961135 | 12.474560 | 65.148807 |
| C | 51.284442 | 10.513370 | 65.469896 |
| C | 52.435517 | 10.563944 | 64.499530 |
| N | 54.722368 | 10.577241 | 62.484932 |
| C | 53.409369 | 10.312906 | 62.203748 |
| C | 53.238176 | 10.192121 | 60.783152 |
| C | 54.489008 | 10.399886 | 60.207714 |
| C | 55.411378 | 10.622847 | 61.277199 |
| N | 57.346052 | 11.115880 | 63.531094 |
| C | 57.708013 | 11.024134 | 62.194967 |
| C | 59.148259 | 11.083120 | 62.100621 |
| C | 59.631248 | 11.166089 | 63.389362 |
| C | 58.490407 | 11.192390 | 64.275467 |
| S | 55.916868 | 8.651906  | 65.093753 |
| O | 57.435140 | 7.846547  | 65.130443 |
| O | 55.345532 | 7.817932  | 63.938608 |
| O | 55.274859 | 8.184705  | 66.361511 |
| C | 52.899647 | 13.711517 | 62.671869 |
| C | 53.736770 | 14.426066 | 63.715864 |
| S | 55.480198 | 13.813515 | 63.706158 |
| H | 54.891203 | 6.361062  | 64.607443 |
| H | 50.328183 | 4.102983  | 72.725584 |

|   |           |          |           |
|---|-----------|----------|-----------|
| H | 50.721335 | 3.448389 | 71.123796 |
| H | 49.351819 | 4.564320 | 71.318076 |
| H | 50.953345 | 6.409840 | 71.971166 |
| H | 52.315172 | 5.292017 | 71.781502 |
| H | 51.813394 | 5.032088 | 69.374410 |
| H | 50.398474 | 6.105714 | 69.528929 |
| H | 52.651467 | 7.139844 | 66.503897 |
| H | 51.694406 | 6.095524 | 67.487337 |
| H | 54.163045 | 8.618595 | 67.623889 |
| H | 53.900946 | 8.947317 | 69.319639 |
| H | 52.066589 | 2.100584 | 62.310815 |
| H | 51.616317 | 2.989785 | 63.776825 |
| H | 53.942374 | 3.562672 | 63.145779 |
| H | 54.434465 | 1.883389 | 63.116334 |
| H | 54.070705 | 1.659780 | 65.545926 |
| H | 53.324378 | 3.241844 | 65.642860 |
| H | 53.724167 | 5.075167 | 64.895300 |
| H | 57.677885 | 4.358669 | 65.510747 |
| H | 57.112909 | 5.999381 | 65.265048 |
| H | 57.765906 | 2.656409 | 61.246091 |
| H | 56.770876 | 3.592166 | 62.383154 |
| H | 58.541174 | 3.689703 | 62.462188 |
| H | 58.549166 | 4.779627 | 60.140552 |
| H | 56.796124 | 4.653505 | 60.094776 |
| H | 56.737727 | 6.133866 | 62.222213 |
| H | 57.194065 | 6.905208 | 60.680847 |
| H | 59.577430 | 6.818919 | 61.293496 |
| H | 59.186746 | 6.037391 | 62.840393 |
| H | 58.022458 | 8.677618 | 62.103182 |
| H | 59.458151 | 8.542078 | 62.868968 |
| H | 51.502799 | 2.795897 | 59.218374 |
| H | 52.610682 | 3.777323 | 58.237233 |
| H | 51.076044 | 4.468957 | 58.802486 |
| H | 53.395004 | 3.596569 | 60.643334 |
| H | 51.872369 | 4.298501 | 61.186894 |
| H | 52.428457 | 6.410590 | 59.874852 |
| H | 53.996228 | 5.699342 | 59.471016 |
| H | 54.480029 | 5.473387 | 61.965375 |
| H | 52.961789 | 6.315159 | 62.310802 |
| H | 55.227237 | 7.455958 | 60.790643 |

|    |           |           |           |
|----|-----------|-----------|-----------|
| H  | 54.838146 | 7.795064  | 62.402340 |
| H  | 59.549542 | 11.204945 | 66.122267 |
| H  | 53.639212 | 12.554469 | 68.165647 |
| H  | 51.402648 | 9.870018  | 62.802804 |
| H  | 57.207434 | 10.794782 | 60.143499 |
| H  | 58.063846 | 9.379878  | 68.538987 |
| H  | 56.339273 | 9.710642  | 68.293576 |
| H  | 57.142066 | 10.220427 | 69.803872 |
| H  | 59.161742 | 12.971207 | 68.113794 |
| H  | 58.677447 | 12.427738 | 69.707093 |
| H  | 55.921836 | 12.237441 | 69.370509 |
| H  | 51.705991 | 10.290651 | 68.256042 |
| H  | 50.145417 | 11.114390 | 67.971694 |
| H  | 51.502992 | 12.018839 | 68.645444 |
| H  | 51.442718 | 13.182420 | 65.061437 |
| H  | 51.527650 | 13.742098 | 66.753368 |
| H  | 51.240332 | 9.525026  | 65.957352 |
| H  | 52.290983 | 10.030226 | 60.275228 |
| H  | 54.740130 | 10.398098 | 59.150562 |
| H  | 59.718847 | 11.050444 | 61.176172 |
| H  | 60.667262 | 11.235764 | 63.709048 |
| H  | 59.383000 | 7.602811  | 67.332610 |
| H  | 52.802648 | 12.647866 | 62.902240 |
| H  | 53.334233 | 14.284812 | 64.725694 |
| H  | 53.793758 | 15.505120 | 63.524887 |
| H  | 52.548548 | 7.575750  | 70.554350 |
| H  | 56.171589 | 2.605002  | 65.589806 |
| H  | 58.087108 | 7.957758  | 63.644482 |
| H  | 53.832249 | 8.280084  | 61.130618 |
| H  | 51.889055 | 14.144328 | 62.637022 |
| H  | 53.349965 | 13.804869 | 61.674882 |
| O  | 52.340229 | 7.340566  | 64.603142 |
| H  | 52.649938 | 8.218618  | 64.274645 |
| H  | 51.373105 | 7.399238  | 64.507161 |
| O  | 59.309918 | 8.321632  | 66.683300 |
| H  | 58.142728 | 8.183050  | 65.865336 |
| H  | 59.608312 | 9.185867  | 67.200246 |
| H  | 52.029520 | 1.265733  | 63.872427 |
| Fe | 55.297778 | 17.838325 | 66.756132 |
| Fe | 57.038764 | 15.979613 | 68.074732 |

|    |           |           |           |
|----|-----------|-----------|-----------|
| Fe | 56.123685 | 15.308999 | 65.446834 |
| Fe | 57.962915 | 17.202843 | 65.644882 |
| S  | 58.281635 | 14.945117 | 66.360242 |
| S  | 55.865297 | 17.483831 | 64.485731 |
| S  | 57.440330 | 18.304784 | 67.696831 |
| S  | 54.765354 | 15.595830 | 67.358090 |
| C  | 56.655012 | 17.001310 | 71.047094 |
| S  | 57.336347 | 15.465638 | 70.287364 |
| C  | 54.140446 | 21.081532 | 66.954506 |
| S  | 53.625791 | 19.337121 | 67.305183 |
| C  | 58.784509 | 19.947189 | 64.543863 |
| S  | 59.560046 | 18.277837 | 64.394462 |
| H  | 55.596425 | 17.111629 | 70.787278 |
| H  | 57.204504 | 17.874889 | 70.680995 |
| H  | 53.364922 | 21.745693 | 67.350285 |
| H  | 55.096592 | 21.297795 | 67.443375 |
| H  | 58.733511 | 20.246906 | 65.596539 |
| H  | 56.758175 | 16.924901 | 72.135603 |
| H  | 57.770074 | 19.921496 | 64.129375 |
| H  | 59.392149 | 20.668202 | 63.984604 |
| H  | 54.240838 | 21.234051 | 65.874462 |
| H  | 56.647097 | 13.455459 | 68.301419 |
| H  | 50.313969 | 10.728976 | 65.007907 |

---

| Cub-Siro-Fe <sup>2+</sup> -SO <sub>3</sub> <sup>2-</sup> |           |          |           |
|----------------------------------------------------------|-----------|----------|-----------|
| Atom                                                     | X         | Y        | Z         |
| C                                                        | 50.420085 | 4.269092 | 71.532002 |
| C                                                        | 51.773900 | 4.981888 | 71.496789 |
| C                                                        | 51.863033 | 6.016198 | 70.371698 |
| N                                                        | 53.127047 | 6.747843 | 70.453496 |
| C                                                        | 53.968976 | 6.964276 | 69.438152 |
| N                                                        | 53.626029 | 6.771413 | 68.166229 |
| N                                                        | 55.247471 | 7.333781 | 69.691001 |
| C                                                        | 52.314085 | 2.142092 | 63.249002 |
| C                                                        | 53.795562 | 2.448924 | 63.378888 |
| C                                                        | 54.366006 | 2.052095 | 64.747131 |
| N                                                        | 55.671344 | 2.664131 | 64.999795 |
| C                                                        | 55.760885 | 4.016744 | 65.087914 |
| N                                                        | 54.682270 | 4.713476 | 65.441079 |
| N                                                        | 56.903990 | 4.649677 | 64.839427 |

|    |           |           |           |
|----|-----------|-----------|-----------|
| C  | 57.713085 | 3.542092  | 61.636002 |
| C  | 57.673085 | 4.723092  | 60.632002 |
| C  | 57.545368 | 6.090296  | 61.316747 |
| C  | 58.809066 | 6.530399  | 62.054761 |
| N  | 58.595423 | 7.849777  | 62.704341 |
| C  | 51.927085 | 3.736092  | 58.952002 |
| C  | 52.620085 | 4.229092  | 60.229003 |
| C  | 52.486899 | 5.705238  | 60.629705 |
| C  | 53.260976 | 5.915516  | 61.934345 |
| N  | 53.160195 | 7.278827  | 62.522308 |
| Fe | 55.035432 | 10.984610 | 64.760653 |
| C  | 58.172708 | 10.645198 | 63.420200 |
| C  | 56.415300 | 11.597602 | 67.809905 |
| C  | 51.929891 | 10.651096 | 66.233067 |
| C  | 53.636713 | 10.162741 | 61.670920 |
| N  | 56.985410 | 11.017147 | 65.507123 |
| C  | 58.121319 | 10.726500 | 64.789002 |
| C  | 59.289187 | 10.522697 | 65.749715 |
| C  | 59.261892 | 9.068419  | 66.283297 |
| C  | 60.676503 | 10.882870 | 65.203707 |
| C  | 61.447992 | 9.857939  | 64.334000 |
| O  | 60.817735 | 9.001653  | 63.612854 |
| O  | 62.700434 | 9.951934  | 64.364764 |
| C  | 58.816500 | 11.439705 | 66.907462 |
| C  | 57.314192 | 11.359973 | 66.771873 |
| N  | 54.286395 | 11.031269 | 66.749483 |
| C  | 55.036349 | 11.395406 | 67.816838 |
| C  | 54.189210 | 11.557248 | 69.081752 |
| C  | 54.741377 | 10.715151 | 70.237172 |
| C  | 54.133893 | 13.052346 | 69.484706 |
| C  | 53.214716 | 13.265737 | 70.708378 |
| O  | 53.765417 | 13.298250 | 71.848894 |
| O  | 51.967092 | 13.355235 | 70.480623 |
| C  | 52.807572 | 11.050432 | 68.596945 |
| C  | 52.970871 | 10.892742 | 67.107530 |
| N  | 53.126505 | 10.455593 | 64.072587 |
| C  | 51.984716 | 10.465439 | 64.825980 |
| C  | 50.845775 | 10.241483 | 63.974799 |
| C  | 51.322474 | 10.100236 | 62.686579 |
| C  | 52.751938 | 10.242928 | 62.752019 |

|   |           |           |           |
|---|-----------|-----------|-----------|
| N | 55.770396 | 10.448474 | 62.871273 |
| C | 55.033724 | 10.267408 | 61.714339 |
| C | 55.927122 | 10.232316 | 60.590293 |
| C | 57.204794 | 10.418533 | 61.085943 |
| C | 57.086063 | 10.555716 | 62.515148 |
| S | 55.594590 | 8.120760  | 65.326193 |
| O | 56.687816 | 7.356280  | 64.553049 |
| O | 54.265611 | 7.319609  | 64.923561 |
| O | 55.790759 | 7.744643  | 66.804215 |
| C | 52.926085 | 13.640092 | 62.544002 |
| C | 53.283424 | 13.849280 | 64.005332 |
| S | 55.019112 | 13.326880 | 64.317648 |
| H | 54.604535 | 5.751613  | 65.291237 |
| H | 50.389326 | 3.536367  | 72.347585 |
| H | 50.228239 | 3.735542  | 70.590747 |
| H | 49.599636 | 4.982935  | 71.687442 |
| H | 51.952706 | 5.486168  | 72.458656 |
| H | 52.579424 | 4.245478  | 71.361709 |
| H | 51.819044 | 5.522208  | 69.393420 |
| H | 51.021391 | 6.722128  | 70.428076 |
| H | 54.360350 | 7.064292  | 67.486561 |
| H | 52.668020 | 6.905620  | 67.823019 |
| H | 55.722017 | 7.848492  | 68.946515 |
| H | 55.525237 | 7.545818  | 70.642006 |
| H | 51.914031 | 2.412789  | 62.268777 |
| H | 51.740267 | 2.682242  | 64.014975 |
| H | 53.935261 | 3.534132  | 63.275338 |
| H | 54.417380 | 2.016626  | 62.582219 |
| H | 54.497562 | 0.966248  | 64.821736 |
| H | 53.670826 | 2.317412  | 65.556500 |
| H | 53.839719 | 4.218731  | 65.697711 |
| H | 57.697001 | 4.132619  | 64.483953 |
| H | 56.916416 | 5.698891  | 64.835113 |
| H | 57.787076 | 2.581714  | 61.110334 |
| H | 56.797097 | 3.527298  | 62.242036 |
| H | 58.576241 | 3.614472  | 62.311124 |
| H | 58.575116 | 4.706925  | 60.002189 |
| H | 56.817674 | 4.585718  | 59.955903 |
| H | 56.708465 | 6.072491  | 62.033727 |
| H | 57.300296 | 6.857917  | 60.566927 |

|   |           |           |           |
|---|-----------|-----------|-----------|
| H | 59.654736 | 6.622053  | 61.363239 |
| H | 59.096885 | 5.823090  | 62.840535 |
| H | 58.223517 | 8.528896  | 62.024179 |
| H | 59.477536 | 8.296688  | 63.127051 |
| H | 52.116215 | 2.664356  | 58.813280 |
| H | 52.295997 | 4.263988  | 58.061562 |
| H | 50.839443 | 3.885386  | 59.003262 |
| H | 53.694614 | 3.992949  | 60.154656 |
| H | 52.247415 | 3.631233  | 61.067847 |
| H | 51.428663 | 5.967932  | 60.781170 |
| H | 52.881798 | 6.366915  | 59.844661 |
| H | 54.330205 | 5.717359  | 61.786240 |
| H | 52.896600 | 5.224489  | 62.703010 |
| H | 53.554992 | 8.024236  | 61.920634 |
| H | 53.680806 | 7.345143  | 63.481142 |
| H | 59.164715 | 10.547114 | 62.984264 |
| H | 56.855330 | 11.927770 | 68.749791 |
| H | 50.930184 | 10.644419 | 66.670501 |
| H | 53.187123 | 10.045095 | 60.683020 |
| H | 59.459700 | 8.348859  | 65.484986 |
| H | 58.288682 | 8.834875  | 66.732423 |
| H | 60.039571 | 8.955138  | 67.051839 |
| H | 60.608512 | 11.811836 | 64.615069 |
| H | 61.336516 | 11.114284 | 66.050243 |
| H | 59.182503 | 11.126939 | 67.892263 |
| H | 54.819060 | 9.667040  | 69.933966 |
| H | 54.076566 | 10.787355 | 71.106513 |
| H | 55.733170 | 11.065316 | 70.549212 |
| H | 53.763848 | 13.639059 | 68.634520 |
| H | 55.146924 | 13.405778 | 69.717819 |
| H | 52.558374 | 10.079198 | 69.053675 |
| H | 49.812863 | 10.206111 | 64.311054 |
| H | 50.749352 | 9.938797  | 61.776982 |
| H | 55.626375 | 10.104700 | 59.553773 |
| H | 58.133743 | 10.484874 | 60.524754 |
| H | 53.085466 | 12.599690 | 62.247859 |
| H | 52.640976 | 13.261062 | 64.671151 |
| H | 53.201393 | 14.904658 | 64.295872 |
| H | 53.445456 | 7.009470  | 71.381537 |
| H | 56.493535 | 2.169003  | 64.672485 |

|    |           |           |           |
|----|-----------|-----------|-----------|
| H  | 57.860347 | 7.779370  | 63.461482 |
| H  | 52.186202 | 7.559911  | 62.694476 |
| H  | 51.869823 | 13.893075 | 62.365656 |
| H  | 53.546440 | 14.280175 | 61.902476 |
| O  | 51.847312 | 7.505646  | 66.123400 |
| H  | 52.744440 | 7.501875  | 65.683296 |
| H  | 51.677626 | 8.467817  | 66.220594 |
| O  | 57.099139 | 5.565851  | 67.917948 |
| H  | 56.712307 | 6.307462  | 67.383281 |
| H  | 56.755147 | 5.746257  | 68.810821 |
| H  | 52.112459 | 1.070083  | 63.391897 |
| Fe | 55.104391 | 17.826000 | 66.349854 |
| Fe | 56.769932 | 15.993527 | 67.921252 |
| Fe | 55.834434 | 15.111137 | 65.590469 |
| Fe | 57.802120 | 17.100394 | 65.487317 |
| S  | 58.106359 | 14.912490 | 66.253177 |
| S  | 55.776792 | 17.066510 | 64.192437 |
| S  | 57.151133 | 18.319427 | 67.446944 |
| S  | 54.431368 | 15.811252 | 67.344278 |
| C  | 56.699085 | 16.928092 | 70.912002 |
| S  | 57.355273 | 15.423764 | 70.059486 |
| C  | 54.175085 | 21.009092 | 66.826002 |
| S  | 53.395999 | 19.373444 | 66.477606 |
| C  | 58.814085 | 19.876092 | 64.405002 |
| S  | 59.507574 | 18.168661 | 64.377419 |
| H  | 55.606503 | 16.871556 | 70.969363 |
| H  | 56.989576 | 17.829739 | 70.361297 |
| H  | 53.471300 | 21.616642 | 67.406061 |
| H  | 55.100047 | 20.875263 | 67.398729 |
| H  | 58.617508 | 20.181699 | 65.438834 |
| H  | 57.114019 | 16.962867 | 71.925880 |
| H  | 57.875831 | 19.909756 | 63.839476 |
| H  | 59.539573 | 20.560373 | 63.949520 |
| H  | 54.406204 | 21.519606 | 65.884118 |
| H  | 59.118814 | 12.487281 | 66.736133 |
| H  | 52.011805 | 11.754484 | 68.872798 |

---

Cub-Siro-Fe<sup>2+</sup>-NO<sub>2</sub><sup>-</sup>

---

| Atom | X         | Y        | Z         |
|------|-----------|----------|-----------|
| C    | 50.331000 | 4.395000 | 71.629000 |



|    |           |           |           |
|----|-----------|-----------|-----------|
| C  | 50.576952 | 5.363569  | 70.456940 |
| C  | 52.054776 | 5.704866  | 70.220324 |
| N  | 52.189208 | 6.552100  | 69.026740 |
| C  | 53.343804 | 7.054295  | 68.538052 |
| N  | 54.517290 | 6.755274  | 69.089478 |
| N  | 53.290252 | 7.877477  | 67.473697 |
| C  | 52.014676 | 2.386622  | 63.403636 |
| C  | 53.476432 | 2.726647  | 63.647583 |
| C  | 53.912488 | 2.437561  | 65.089847 |
| N  | 55.206979 | 3.036002  | 65.415199 |
| C  | 55.359960 | 4.376131  | 65.428839 |
| N  | 54.295038 | 5.175654  | 65.534999 |
| N  | 56.565376 | 4.942657  | 65.347585 |
| C  | 57.527496 | 3.689662  | 61.815396 |
| C  | 57.508096 | 4.862472  | 60.801236 |
| C  | 57.186717 | 6.194503  | 61.505247 |
| C  | 58.304050 | 6.711556  | 62.406820 |
| N  | 57.893415 | 7.957533  | 63.120170 |
| C  | 51.593946 | 3.987472  | 59.112356 |
| C  | 52.310056 | 4.470472  | 60.380396 |
| C  | 52.935926 | 5.863386  | 60.318826 |
| C  | 53.419789 | 6.228370  | 61.714440 |
| N  | 54.156745 | 7.513813  | 61.796570 |
| Fe | 54.722338 | 11.026331 | 64.750618 |
| C  | 57.552706 | 10.759604 | 66.595440 |
| C  | 53.076981 | 12.287961 | 67.340753 |
| C  | 51.802436 | 10.157384 | 63.222552 |
| C  | 56.439305 | 10.868018 | 61.854756 |
| N  | 55.198620 | 11.315154 | 66.651671 |
| C  | 56.393489 | 11.012959 | 67.276953 |
| C  | 56.246022 | 11.260095 | 68.779317 |
| C  | 55.495634 | 10.125675 | 69.513273 |
| C  | 57.541484 | 11.621672 | 69.498608 |
| C  | 58.560209 | 10.491741 | 69.774925 |
| O  | 58.432725 | 9.361076  | 69.188199 |
| O  | 59.491536 | 10.781227 | 70.568234 |
| C  | 55.240328 | 12.439340 | 68.689544 |
| C  | 54.426467 | 12.036731 | 67.505513 |
| N  | 52.788411 | 11.054960 | 65.260862 |
| C  | 52.303044 | 11.693442 | 66.358434 |

|   |           |           |           |
|---|-----------|-----------|-----------|
| C | 50.783500 | 11.702011 | 66.378437 |
| C | 50.199651 | 11.415532 | 67.762773 |
| C | 50.321460 | 13.084656 | 65.837670 |
| C | 48.775336 | 13.172926 | 65.748684 |
| O | 48.185747 | 13.801973 | 66.670951 |
| O | 48.234219 | 12.582446 | 64.763906 |
| C | 50.472421 | 10.587594 | 65.354695 |
| C | 51.728078 | 10.537074 | 64.533508 |
| N | 54.222962 | 10.524345 | 62.889474 |
| C | 52.958494 | 10.276496 | 62.415674 |
| C | 52.981348 | 10.229800 | 60.984985 |
| C | 54.289441 | 10.482341 | 60.593687 |
| C | 55.059744 | 10.646918 | 61.782753 |
| N | 56.632626 | 10.849026 | 64.305529 |
| C | 57.175299 | 10.954633 | 63.028506 |
| C | 58.606575 | 11.028076 | 63.139947 |
| C | 58.917844 | 10.908274 | 64.476419 |
| C | 57.675915 | 10.819952 | 65.195419 |
| N | 55.237388 | 8.299015  | 65.179840 |
| O | 56.468405 | 7.725702  | 65.256867 |
| O | 54.435132 | 7.535230  | 64.344369 |
| C | 52.650586 | 13.550772 | 62.708276 |
| C | 53.393260 | 14.230706 | 63.842259 |
| S | 55.002304 | 13.403407 | 64.171428 |
| H | 54.363740 | 6.145974  | 65.108893 |
| H | 49.257698 | 4.199097  | 71.736283 |
| H | 50.697944 | 4.813867  | 72.575867 |
| H | 50.837010 | 3.433938  | 71.462975 |
| H | 50.165428 | 4.933535  | 69.531540 |
| H | 50.032917 | 6.301042  | 70.647405 |
| H | 52.464643 | 6.223955  | 71.102059 |
| H | 52.637729 | 4.782959  | 70.069412 |
| H | 55.416367 | 7.113128  | 68.673025 |
| H | 54.547194 | 6.290581  | 69.988382 |
| H | 54.167921 | 8.158702  | 67.015969 |
| H | 52.517749 | 7.778045  | 66.798952 |
| H | 51.720913 | 2.599327  | 62.371056 |
| H | 51.364003 | 2.970019  | 64.069257 |
| H | 53.622415 | 3.799517  | 63.457128 |
| H | 54.155523 | 2.211008  | 62.954026 |

|   |           |           |           |
|---|-----------|-----------|-----------|
| H | 54.002599 | 1.359758  | 65.263513 |
| H | 53.156135 | 2.792864  | 65.805462 |
| H | 53.374727 | 4.756649  | 65.566472 |
| H | 57.400109 | 4.379139  | 65.263585 |
| H | 56.615510 | 5.986506  | 65.382000 |
| H | 57.693319 | 2.731529  | 61.307829 |
| H | 56.568714 | 3.629281  | 62.349584 |
| H | 58.324361 | 3.811884  | 62.559881 |
| H | 58.472455 | 4.935394  | 60.278917 |
| H | 56.742191 | 4.675183  | 60.037186 |
| H | 56.289922 | 6.047444  | 62.127861 |
| H | 56.965917 | 6.968529  | 60.751506 |
| H | 59.202640 | 6.929833  | 61.818618 |
| H | 58.570741 | 5.979280  | 63.176204 |
| H | 57.451028 | 8.640572  | 62.486845 |
| H | 58.706512 | 8.454930  | 63.506424 |
| H | 51.181888 | 2.981744  | 59.262609 |
| H | 52.280397 | 3.947523  | 58.255178 |
| H | 50.764835 | 4.657816  | 58.847979 |
| H | 53.094720 | 3.746732  | 60.651674 |
| H | 51.588014 | 4.460700  | 61.211653 |
| H | 52.200377 | 6.605660  | 59.974651 |
| H | 53.774860 | 5.880559  | 59.605829 |
| H | 54.094102 | 5.453492  | 62.104000 |
| H | 52.578035 | 6.307428  | 62.413606 |
| H | 55.008422 | 7.492133  | 61.230048 |
| H | 54.405474 | 7.681912  | 62.863631 |
| H | 58.457560 | 10.587982 | 67.170330 |
| H | 52.577378 | 12.875834 | 68.105754 |
| H | 50.876070 | 9.872979  | 62.725855 |
| H | 56.978576 | 10.968980 | 60.913289 |
| H | 56.116190 | 9.236603  | 69.615677 |
| H | 54.567289 | 9.863312  | 68.989932 |
| H | 55.230383 | 10.484180 | 70.517025 |
| H | 58.068217 | 12.408292 | 68.936231 |
| H | 57.291846 | 12.073461 | 70.468694 |
| H | 54.662507 | 12.615039 | 69.601507 |
| H | 50.624914 | 10.491499 | 68.176805 |
| H | 49.110579 | 11.303125 | 67.691098 |
| H | 50.398216 | 12.237031 | 68.461275 |

|    |           |           |           |
|----|-----------|-----------|-----------|
| H  | 50.744836 | 13.229512 | 64.834809 |
| H  | 50.703973 | 13.870831 | 66.500081 |
| H  | 50.321750 | 9.633479  | 65.886354 |
| H  | 52.109770 | 10.085729 | 60.353451 |
| H  | 54.682714 | 10.540856 | 59.583120 |
| H  | 59.288698 | 11.139353 | 62.301889 |
| H  | 59.898609 | 10.926891 | 64.941260 |
| H  | 52.290746 | 12.563817 | 63.002562 |
| H  | 52.812869 | 14.229570 | 64.772954 |
| H  | 53.636597 | 15.273994 | 63.600337 |
| H  | 51.336688 | 6.966596  | 68.663136 |
| H  | 56.039656 | 2.464045  | 65.331997 |
| H  | 57.203798 | 7.807437  | 64.004822 |
| H  | 53.592459 | 8.319016  | 61.458183 |
| H  | 51.777348 | 14.153662 | 62.419427 |
| H  | 53.294163 | 13.434270 | 61.826666 |
| O  | 51.889194 | 7.417890  | 65.016126 |
| H  | 52.847893 | 7.569096  | 64.732448 |
| H  | 51.428133 | 8.178455  | 64.616049 |
| O  | 56.891344 | 7.581144  | 67.943378 |
| H  | 56.812098 | 7.791684  | 66.976624 |
| H  | 57.410636 | 8.337199  | 68.358004 |
| H  | 51.811992 | 1.322997  | 63.593074 |
| Fe | 54.924292 | 17.789435 | 66.395682 |
| Fe | 56.428312 | 15.904997 | 68.159318 |
| Fe | 55.712077 | 14.997104 | 65.740084 |
| Fe | 57.757876 | 17.018013 | 65.819239 |
| S  | 57.908768 | 14.810246 | 66.594045 |
| S  | 55.859380 | 16.976241 | 64.359068 |
| S  | 56.841195 | 18.207848 | 67.712120 |
| S  | 54.159097 | 15.751438 | 67.328641 |
| C  | 56.384436 | 16.838522 | 71.093916 |
| S  | 56.622832 | 15.189543 | 70.312200 |
| C  | 53.777736 | 20.906312 | 67.046846 |
| S  | 53.320836 | 19.388168 | 66.100132 |
| C  | 58.430386 | 19.876242 | 64.606136 |
| S  | 59.373898 | 18.315408 | 64.874439 |
| H  | 55.445486 | 17.289953 | 70.754899 |
| H  | 57.214606 | 17.504958 | 70.839590 |
| H  | 52.905822 | 21.231342 | 67.624080 |

|   |           |           |           |
|---|-----------|-----------|-----------|
| H | 54.611348 | 20.697094 | 67.725655 |
| H | 58.070639 | 20.258937 | 65.567237 |
| H | 56.344742 | 16.699967 | 72.180589 |
| H | 57.573328 | 19.682826 | 63.952432 |
| H | 59.098082 | 20.608427 | 64.139594 |
| H | 54.068465 | 21.693579 | 66.343308 |
| H | 55.773697 | 13.373494 | 68.437387 |
| H | 49.575775 | 10.813704 | 64.767110 |

---

Cub-Siro-Fe<sup>3+</sup>-HSO<sub>3</sub><sup>-</sup>

---

| Atom | X         | Y         | Z         |
|------|-----------|-----------|-----------|
| C    | 50.371954 | 4.344128  | 71.656461 |
| C    | 51.588346 | 5.241150  | 71.432264 |
| C    | 51.705401 | 5.656656  | 69.970732 |
| N    | 52.866735 | 6.522942  | 69.776248 |
| C    | 53.292734 | 6.955327  | 68.583208 |
| N    | 52.649431 | 6.594152  | 67.468391 |
| N    | 54.362979 | 7.764115  | 68.505615 |
| C    | 52.284255 | 2.214920  | 63.378235 |
| C    | 53.776794 | 2.439895  | 63.584796 |
| C    | 54.174367 | 2.354563  | 65.063819 |
| N    | 55.545538 | 2.794952  | 65.313997 |
| C    | 55.909780 | 4.084241  | 65.204907 |
| N    | 54.970083 | 5.013936  | 65.030144 |
| N    | 57.197224 | 4.441136  | 65.256444 |
| C    | 57.687124 | 3.613611  | 61.777097 |
| C    | 57.649595 | 4.794390  | 60.772743 |
| C    | 57.874485 | 6.169259  | 61.419329 |
| C    | 59.331096 | 6.393241  | 61.810394 |
| N    | 59.491488 | 7.666330  | 62.579994 |
| C    | 51.907225 | 3.808014  | 59.080012 |
| C    | 52.597431 | 4.301183  | 60.358461 |
| C    | 53.260288 | 5.686689  | 60.308050 |
| C    | 53.838733 | 6.023966  | 61.682426 |
| N    | 54.554017 | 7.341819  | 61.725066 |
| Fe   | 55.234479 | 11.489098 | 64.356105 |
| C    | 58.409964 | 10.925320 | 65.636070 |
| C    | 54.208276 | 12.493822 | 67.371230 |
| C    | 52.029448 | 10.348217 | 63.618694 |
| C    | 56.306636 | 10.577491 | 61.250755 |

|   |           |           |           |
|---|-----------|-----------|-----------|
| N | 56.146295 | 11.568205 | 66.221816 |
| C | 57.428554 | 11.195237 | 66.557558 |
| C | 57.564335 | 11.268909 | 68.080439 |
| C | 56.898774 | 10.035549 | 68.738390 |
| C | 58.992766 | 11.469255 | 68.616280 |
| C | 59.696243 | 10.115598 | 68.823258 |
| O | 59.874678 | 9.396060  | 67.762159 |
| O | 59.991919 | 9.756213  | 69.983030 |
| C | 56.590349 | 12.446198 | 68.343432 |
| C | 55.564519 | 12.203589 | 67.271359 |
| N | 53.412869 | 11.336957 | 65.372637 |
| C | 53.204782 | 12.008149 | 66.535393 |
| C | 51.718645 | 12.172085 | 66.813872 |
| C | 51.338133 | 12.008454 | 68.284574 |
| C | 51.331214 | 13.583071 | 66.278311 |
| C | 49.801903 | 13.823746 | 66.353118 |
| O | 49.373500 | 14.481843 | 67.340895 |
| O | 49.108844 | 13.313459 | 65.419557 |
| C | 51.128707 | 11.067275 | 65.903945 |
| C | 52.212017 | 10.866688 | 64.880275 |
| N | 54.329053 | 10.555723 | 62.729885 |
| C | 53.000401 | 10.266100 | 62.580420 |
| C | 52.732202 | 9.959495  | 61.203358 |
| C | 53.928360 | 10.111589 | 60.513476 |
| C | 54.928969 | 10.458633 | 61.478286 |
| N | 57.046512 | 10.864457 | 63.577809 |
| C | 57.296614 | 10.749809 | 62.217313 |
| C | 58.720745 | 10.746595 | 62.011089 |
| C | 59.311393 | 10.819374 | 63.258661 |
| C | 58.251323 | 10.891636 | 64.229372 |
| S | 56.725145 | 8.112254  | 65.078121 |
| O | 57.869773 | 7.212018  | 64.606810 |
| O | 55.462048 | 7.607817  | 64.330807 |
| O | 56.429350 | 7.465835  | 66.558637 |
| C | 52.899859 | 13.712653 | 62.672016 |
| C | 53.868062 | 14.575834 | 63.452416 |
| S | 55.495118 | 13.741707 | 63.728500 |
| H | 55.213115 | 6.009092  | 64.863647 |
| H | 50.298613 | 4.043761  | 72.708500 |
| H | 50.436113 | 3.430404  | 71.049781 |

|   |           |          |           |
|---|-----------|----------|-----------|
| H | 49.441090 | 4.862660 | 71.389770 |
| H | 51.519514 | 6.140872 | 72.060729 |
| H | 52.502429 | 4.702973 | 71.724580 |
| H | 51.808812 | 4.757543 | 69.342122 |
| H | 50.793832 | 6.189079 | 69.656697 |
| H | 52.780825 | 7.115202 | 66.572740 |
| H | 51.788306 | 6.069234 | 67.561784 |
| H | 54.942210 | 7.770895 | 67.655460 |
| H | 54.864101 | 7.973533 | 69.361774 |
| H | 52.028386 | 2.214976 | 62.313243 |
| H | 51.696866 | 3.005384 | 63.865217 |
| H | 54.043832 | 3.436767 | 63.206743 |
| H | 54.392322 | 1.734634 | 63.009457 |
| H | 54.100623 | 1.322441 | 65.423119 |
| H | 53.481490 | 2.937726 | 65.690751 |
| H | 53.996044 | 4.775850 | 65.158014 |
| H | 57.919975 | 3.733118 | 65.261953 |
| H | 57.475544 | 5.425512 | 65.126347 |
| H | 57.525210 | 2.661446 | 61.258053 |
| H | 56.900213 | 3.726840 | 62.534530 |
| H | 58.650173 | 3.551037 | 62.299662 |
| H | 58.394969 | 4.634182 | 59.980047 |
| H | 56.672099 | 4.797179 | 60.269067 |
| H | 57.250956 | 6.266175 | 62.321552 |
| H | 57.578329 | 6.966049 | 60.718481 |
| H | 59.976750 | 6.439430 | 60.927187 |
| H | 59.694686 | 5.592611 | 62.463050 |
| H | 59.193469 | 8.508268 | 62.058680 |
| H | 60.464820 | 7.819223 | 62.859290 |
| H | 51.476097 | 2.812936 | 59.243682 |
| H | 52.615726 | 3.737911 | 58.243400 |
| H | 51.095724 | 4.484145 | 58.778873 |
| H | 53.363809 | 3.566348 | 60.652842 |
| H | 51.859499 | 4.309047 | 61.175540 |
| H | 52.526699 | 6.453753 | 60.018952 |
| H | 54.060433 | 5.699838 | 59.551604 |
| H | 54.564254 | 5.264903 | 62.001899 |
| H | 53.051594 | 6.081089 | 62.443102 |
| H | 55.330940 | 7.365465 | 61.055898 |
| H | 54.955814 | 7.538518 | 62.683554 |

|    |           |           |           |
|----|-----------|-----------|-----------|
| H  | 59.400751 | 10.711108 | 66.029542 |
| H  | 53.893727 | 13.051911 | 68.249598 |
| H  | 51.010087 | 10.077129 | 63.346363 |
| H  | 56.639954 | 10.485012 | 60.216737 |
| H  | 57.404485 | 9.107643  | 68.467627 |
| H  | 55.848795 | 9.968229  | 68.429525 |
| H  | 56.934125 | 10.151886 | 69.829212 |
| H  | 59.562773 | 12.101339 | 67.921126 |
| H  | 58.945026 | 11.987126 | 69.581419 |
| H  | 56.180421 | 12.469395 | 69.358003 |
| H  | 51.698326 | 11.046750 | 68.674193 |
| H  | 50.247797 | 12.049367 | 68.394293 |
| H  | 51.755650 | 12.815745 | 68.898491 |
| H  | 51.649287 | 13.658712 | 65.230244 |
| H  | 51.868096 | 14.341255 | 66.862070 |
| H  | 50.982083 | 10.141245 | 66.483459 |
| H  | 51.756287 | 9.715019  | 60.794284 |
| H  | 54.100033 | 9.981331  | 59.448528 |
| H  | 59.212324 | 10.725248 | 61.041396 |
| H  | 60.371382 | 10.845283 | 63.493922 |
| H  | 57.368455 | 7.379311  | 67.087659 |
| H  | 52.593707 | 12.833917 | 63.246235 |
| H  | 53.464093 | 14.844301 | 64.437484 |
| H  | 54.113525 | 15.506267 | 62.927063 |
| H  | 53.447071 | 6.720583  | 70.584432 |
| H  | 56.266616 | 2.101390  | 65.473029 |
| H  | 58.884311 | 7.616707  | 63.461758 |
| H  | 53.925191 | 8.136391  | 61.466503 |
| H  | 51.995063 | 14.291483 | 62.439915 |
| H  | 53.341972 | 13.367313 | 61.728447 |
| O  | 52.902231 | 7.733269  | 64.980367 |
| H  | 53.868660 | 7.863857  | 64.787547 |
| H  | 52.489411 | 8.593484  | 64.737036 |
| O  | 58.640605 | 7.199419  | 67.741019 |
| H  | 59.215539 | 8.090511  | 67.787621 |
| H  | 58.557954 | 6.899907  | 68.662620 |
| H  | 51.961226 | 1.251728  | 63.797152 |
| Fe | 55.270189 | 18.008934 | 66.203918 |
| Fe | 56.675485 | 16.060871 | 68.025754 |
| Fe | 56.098378 | 15.195998 | 65.496825 |



|    |           |           |           |
|----|-----------|-----------|-----------|
| Fe | 58.149460 | 17.208426 | 65.759614 |
| S  | 58.238330 | 14.994049 | 66.483438 |
| S  | 56.319802 | 17.224465 | 64.214640 |
| S  | 57.126630 | 18.355366 | 67.625885 |
| S  | 54.486354 | 15.920438 | 67.033020 |
| C  | 56.654555 | 17.001889 | 71.047760 |
| S  | 56.741752 | 15.370530 | 70.191457 |
| C  | 54.140492 | 21.082405 | 66.955155 |
| S  | 53.739010 | 19.647907 | 65.865169 |
| C  | 58.784741 | 19.948045 | 64.544879 |
| S  | 59.824013 | 18.474356 | 64.920115 |
| H  | 55.724473 | 17.515224 | 70.781935 |
| H  | 57.507395 | 17.624529 | 70.760305 |
| H  | 53.202906 | 21.594816 | 67.194923 |
| H  | 54.620879 | 20.739165 | 67.877569 |
| H  | 58.302419 | 20.307022 | 65.460474 |
| H  | 56.675277 | 16.819250 | 72.127906 |
| H  | 58.016202 | 19.684979 | 63.810680 |
| H  | 59.434175 | 20.731862 | 64.139261 |
| H  | 54.812088 | 21.765902 | 66.424922 |
| H  | 57.104395 | 13.401510 | 68.142088 |
| H  | 50.171392 | 11.370455 | 65.464286 |

---

Cub-Siro-Fe<sup>3+</sup>-SO<sub>3</sub><sup>2-</sup>

---

| Atom | X         | Y        | Z         |
|------|-----------|----------|-----------|
| C    | 50.420085 | 4.269092 | 71.532002 |
| C    | 51.686487 | 5.125442 | 71.471219 |
| C    | 51.629230 | 6.161880 | 70.346768 |
| N    | 52.800731 | 7.035068 | 70.394907 |
| C    | 53.565378 | 7.377350 | 69.349802 |
| N    | 53.156957 | 7.196639 | 68.088389 |
| N    | 54.777813 | 7.908717 | 69.551723 |
| C    | 52.314085 | 2.142092 | 63.249002 |
| C    | 53.777298 | 2.539316 | 63.352845 |
| C    | 54.418630 | 2.147340 | 64.689867 |
| N    | 55.689943 | 2.839691 | 64.910217 |
| C    | 55.715232 | 4.186212 | 65.057417 |
| N    | 54.617142 | 4.822485 | 65.469751 |
| N    | 56.822639 | 4.882225 | 64.811976 |
| C    | 57.713085 | 3.542092 | 61.636002 |

|    |           |           |           |
|----|-----------|-----------|-----------|
| C  | 57.673085 | 4.723092  | 60.632002 |
| C  | 57.434061 | 6.081916  | 61.299336 |
| C  | 58.652101 | 6.604502  | 62.053398 |
| N  | 58.382154 | 7.948017  | 62.625383 |
| C  | 51.927085 | 3.736092  | 58.952002 |
| C  | 52.620085 | 4.229092  | 60.229002 |
| C  | 52.261675 | 5.633057  | 60.735896 |
| C  | 53.206297 | 5.989709  | 61.881707 |
| N  | 52.875011 | 7.243546  | 62.610807 |
| Fe | 54.940917 | 10.997103 | 64.974881 |
| C  | 57.940934 | 10.716148 | 63.337118 |
| C  | 56.603300 | 11.734027 | 67.858220 |
| C  | 52.004316 | 10.690812 | 66.757982 |
| C  | 53.261590 | 10.225200 | 62.042586 |
| N  | 56.952731 | 11.069284 | 65.533469 |
| C  | 58.016427 | 10.792908 | 64.705474 |
| C  | 59.269920 | 10.608124 | 65.557361 |
| C  | 59.282087 | 9.159577  | 66.109029 |
| C  | 60.609869 | 10.952610 | 64.886597 |
| C  | 61.307476 | 9.810693  | 64.112872 |
| O  | 60.635617 | 9.152463  | 63.233131 |
| O  | 62.516429 | 9.600245  | 64.365918 |
| C  | 58.905385 | 11.533012 | 66.744038 |
| C  | 57.398913 | 11.449603 | 66.752879 |
| N  | 54.393570 | 11.115176 | 67.016037 |
| C  | 55.228611 | 11.545593 | 67.994205 |
| C  | 54.475633 | 11.839930 | 69.287478 |
| C  | 55.189715 | 11.327713 | 70.540966 |
| C  | 54.305278 | 13.375220 | 69.368741 |
| C  | 53.518928 | 13.911828 | 70.595959 |
| O  | 52.634416 | 13.168598 | 71.119014 |
| O  | 53.820604 | 15.084766 | 70.954911 |
| C  | 53.125489 | 11.138739 | 69.008280 |
| C  | 53.123490 | 10.955036 | 67.514813 |
| N  | 52.984493 | 10.499308 | 64.489368 |
| C  | 51.921264 | 10.516131 | 65.355252 |
| C  | 50.703804 | 10.322091 | 64.611680 |
| C  | 51.058160 | 10.194527 | 63.279788 |
| C  | 52.485294 | 10.303477 | 63.208535 |
| N  | 55.503962 | 10.496562 | 63.016902 |

|   |           |           |           |
|---|-----------|-----------|-----------|
| C | 54.654262 | 10.324256 | 61.941163 |
| C | 55.433564 | 10.309290 | 60.731925 |
| C | 56.751571 | 10.495695 | 61.099514 |
| C | 56.775608 | 10.616355 | 62.536961 |
| S | 55.406170 | 8.308465  | 65.365516 |
| O | 56.586351 | 7.623722  | 64.665609 |
| O | 54.153723 | 7.437662  | 64.928800 |
| O | 55.547036 | 7.984159  | 66.858256 |
| C | 52.926085 | 13.640092 | 62.544002 |
| C | 53.185950 | 13.806370 | 64.031626 |
| S | 54.920595 | 13.316131 | 64.404091 |
| H | 54.504086 | 5.857004  | 65.341378 |
| H | 50.485983 | 3.535458  | 72.344704 |
| H | 50.267560 | 3.719411  | 70.592791 |
| H | 49.529898 | 4.888447  | 71.708326 |
| H | 51.831064 | 5.645009  | 72.430652 |
| H | 52.563672 | 4.481248  | 71.313571 |
| H | 51.616016 | 5.659829  | 69.371226 |
| H | 50.710492 | 6.762606  | 70.426634 |
| H | 53.842282 | 7.467495  | 67.367055 |
| H | 52.173178 | 7.188849  | 67.840686 |
| H | 55.309229 | 8.201445  | 68.726955 |
| H | 55.255488 | 7.787897  | 70.435108 |
| H | 51.869669 | 2.421759  | 62.290070 |
| H | 51.727261 | 2.623004  | 64.044148 |
| H | 53.848121 | 3.632566  | 63.279170 |
| H | 54.397853 | 2.167708  | 62.525209 |
| H | 54.625595 | 1.072168  | 64.732963 |
| H | 53.738349 | 2.350127  | 65.529484 |
| H | 53.791875 | 4.285495  | 65.698144 |
| H | 57.632100 | 4.418348  | 64.422002 |
| H | 56.810068 | 5.924528  | 64.889794 |
| H | 57.864859 | 2.588113  | 61.116228 |
| H | 56.764329 | 3.480820  | 62.186956 |
| H | 58.532359 | 3.653720  | 62.359681 |
| H | 58.610456 | 4.754628  | 60.057237 |
| H | 56.868882 | 4.539150  | 59.906064 |
| H | 56.580525 | 6.016416  | 61.993740 |
| H | 57.162614 | 6.824093  | 60.532928 |
| H | 59.514446 | 6.693500  | 61.382480 |

|   |           |           |           |
|---|-----------|-----------|-----------|
| H | 58.945823 | 5.949696  | 62.881419 |
| H | 57.959555 | 8.560156  | 61.914237 |
| H | 59.278575 | 8.452609  | 62.966177 |
| H | 52.276951 | 2.728358  | 58.696183 |
| H | 52.140948 | 4.396862  | 58.100864 |
| H | 50.836060 | 3.693810  | 59.077866 |
| H | 53.709738 | 4.196580  | 60.062361 |
| H | 52.428059 | 3.514706  | 61.035131 |
| H | 51.219268 | 5.658092  | 61.088325 |
| H | 52.353011 | 6.375044  | 59.929137 |
| H | 54.236107 | 6.096882  | 61.520838 |
| H | 53.198945 | 5.197420  | 62.637042 |
| H | 52.963612 | 8.098547  | 62.036637 |
| H | 53.520769 | 7.384088  | 63.464802 |
| H | 58.892567 | 10.633081 | 62.815030 |
| H | 57.128649 | 12.102360 | 68.737581 |
| H | 51.058524 | 10.637536 | 67.296819 |
| H | 52.711789 | 10.130227 | 61.103700 |
| H | 59.391733 | 8.422699  | 65.308468 |
| H | 58.347358 | 8.956072  | 66.645554 |
| H | 60.123805 | 9.047595  | 66.805697 |
| H | 60.466743 | 11.799010 | 64.197437 |
| H | 61.311849 | 11.286400 | 65.660112 |
| H | 59.360573 | 11.228016 | 67.693233 |
| H | 55.422490 | 10.259642 | 70.457459 |
| H | 54.539368 | 11.485471 | 71.409395 |
| H | 56.124178 | 11.877072 | 70.715106 |
| H | 53.789010 | 13.740344 | 68.467430 |
| H | 55.292170 | 13.857371 | 69.367120 |
| H | 53.097866 | 10.154561 | 69.502303 |
| H | 49.703608 | 10.323733 | 65.036801 |
| H | 50.397334 | 10.055467 | 62.428438 |
| H | 55.033058 | 10.195593 | 59.728380 |
| H | 57.619186 | 10.572575 | 60.449279 |
| H | 53.145161 | 12.620527 | 62.217610 |
| H | 52.529375 | 13.172663 | 64.637983 |
| H | 53.056308 | 14.846919 | 64.354849 |
| H | 53.136697 | 7.306769  | 71.313953 |
| H | 56.534731 | 2.397618  | 64.564799 |
| H | 57.684655 | 7.911123  | 63.413637 |

|    |           |           |           |
|----|-----------|-----------|-----------|
| H  | 51.924611 | 7.224916  | 63.007081 |
| H  | 51.872230 | 13.858035 | 62.315552 |
| H  | 53.554006 | 14.330172 | 61.965852 |
| O  | 51.498869 | 7.336809  | 65.382322 |
| H  | 52.478173 | 7.506460  | 65.347742 |
| H  | 51.114082 | 8.230805  | 65.270567 |
| O  | 57.639373 | 6.458824  | 67.732881 |
| H  | 56.903872 | 6.996572  | 67.336030 |
| H  | 58.443280 | 6.863722  | 67.366500 |
| H  | 52.184227 | 1.055735  | 63.358872 |
| Fe | 55.186660 | 18.014602 | 66.038377 |
| Fe | 56.687175 | 16.113426 | 67.910088 |
| Fe | 55.730830 | 15.118412 | 65.595737 |
| Fe | 57.925469 | 17.062767 | 65.389893 |
| S  | 57.992739 | 14.907570 | 66.255812 |
| S  | 55.937476 | 16.961190 | 64.046453 |
| S  | 57.166570 | 18.382659 | 67.263743 |
| S  | 54.387631 | 16.129307 | 67.229371 |
| C  | 56.699085 | 16.928092 | 70.912002 |
| S  | 57.540415 | 15.605190 | 69.938792 |
| C  | 54.175085 | 21.009092 | 66.826002 |
| S  | 53.763305 | 19.722136 | 65.573931 |
| C  | 58.814085 | 19.876092 | 64.405002 |
| S  | 59.613099 | 18.215631 | 64.412717 |
| H  | 55.650173 | 16.636982 | 71.044309 |
| H  | 56.773255 | 17.887963 | 70.389010 |
| H  | 53.689342 | 20.768385 | 67.777710 |
| H  | 55.258840 | 21.064113 | 66.975002 |
| H  | 58.651072 | 20.211118 | 65.434595 |
| H  | 57.195093 | 17.002883 | 71.886508 |
| H  | 57.851552 | 19.828934 | 63.884191 |
| H  | 59.479231 | 20.574344 | 63.884386 |
| H  | 53.805548 | 21.973321 | 66.459788 |
| H  | 59.191050 | 12.578094 | 66.538848 |
| H  | 52.281180 | 11.719396 | 69.390910 |

---

Cub-Siro-Fe<sup>3+</sup>-NO<sub>2</sub><sup>-</sup>

---

| Atom | X         | Y        | Z         |
|------|-----------|----------|-----------|
| C    | 50.331000 | 4.395000 | 71.629000 |
| C    | 51.501030 | 5.387188 | 71.636689 |

|    |           |           |           |
|----|-----------|-----------|-----------|
| C  | 51.705083 | 6.097876  | 70.292687 |
| N  | 52.759838 | 7.110369  | 70.408956 |
| C  | 53.812517 | 7.262937  | 69.596779 |
| N  | 53.845428 | 6.700205  | 68.373084 |
| N  | 54.872694 | 7.973947  | 70.001306 |
| C  | 52.014676 | 2.386622  | 63.403636 |
| C  | 53.485255 | 2.765262  | 63.517782 |
| C  | 54.050918 | 2.528626  | 64.923355 |
| N  | 55.360682 | 3.153538  | 65.111269 |
| C  | 55.504398 | 4.490210  | 65.154416 |
| N  | 54.447328 | 5.282576  | 65.316931 |
| N  | 56.708635 | 5.066926  | 65.048854 |
| C  | 57.527496 | 3.689662  | 61.815396 |
| C  | 57.508096 | 4.862472  | 60.801236 |
| C  | 57.287819 | 6.233550  | 61.479363 |
| C  | 58.517157 | 6.747545  | 62.224070 |
| N  | 58.262335 | 8.068206  | 62.883959 |
| C  | 51.593946 | 3.987472  | 59.112356 |
| C  | 52.310055 | 4.470472  | 60.380396 |
| C  | 52.869185 | 5.894544  | 60.376558 |
| C  | 53.421275 | 6.188464  | 61.766569 |
| N  | 53.991247 | 7.550218  | 61.931038 |
| Fe | 55.303129 | 10.873539 | 64.549872 |
| C  | 58.686001 | 11.281638 | 65.062232 |
| C  | 54.728175 | 11.495554 | 67.842539 |
| C  | 51.922153 | 10.253663 | 64.086886 |
| C  | 55.803445 | 10.742563 | 61.142995 |
| N  | 56.534338 | 11.228551 | 66.211582 |
| C  | 57.904248 | 11.318549 | 66.196499 |
| C  | 58.445162 | 11.472026 | 67.618904 |
| C  | 58.798821 | 10.068043 | 68.156446 |
| C  | 59.632393 | 12.450096 | 67.781669 |
| C  | 61.024362 | 11.808177 | 67.603350 |
| O  | 61.378771 | 11.461831 | 66.432833 |
| O  | 61.718576 | 11.657072 | 68.649581 |
| C  | 57.176696 | 11.980407 | 68.340818 |
| C  | 56.057824 | 11.536036 | 67.444345 |
| N  | 53.587835 | 10.768158 | 65.801434 |
| C  | 53.602334 | 11.133939 | 67.103339 |
| C  | 52.204039 | 11.180019 | 67.702452 |

|   |           |           |           |
|---|-----------|-----------|-----------|
| C | 52.081741 | 10.268765 | 68.929423 |
| C | 51.893905 | 12.660812 | 68.051403 |
| C | 50.429542 | 12.819361 | 68.532379 |
| O | 50.241067 | 12.818544 | 69.781062 |
| O | 49.546758 | 12.900013 | 67.626202 |
| C | 51.330979 | 10.685080 | 66.525149 |
| C | 52.300058 | 10.522352 | 65.384490 |
| N | 54.082612 | 10.511459 | 62.902109 |
| C | 52.729155 | 10.281322 | 62.926673 |
| C | 52.247993 | 10.162842 | 61.576848 |
| C | 53.334787 | 10.358412 | 60.739696 |
| C | 54.482992 | 10.564347 | 61.576487 |
| N | 56.948768 | 10.962248 | 63.320131 |
| C | 56.939900 | 10.925679 | 61.934298 |
| C | 58.290617 | 11.103041 | 61.460693 |
| C | 59.097457 | 11.245624 | 62.567864 |
| C | 58.249280 | 11.163650 | 63.728804 |
| N | 55.531819 | 8.614172  | 64.723505 |
| O | 56.665943 | 7.903546  | 64.965216 |
| O | 54.469235 | 7.802430  | 64.474267 |
| C | 52.650586 | 13.550772 | 62.708276 |
| C | 53.062538 | 13.615186 | 64.168923 |
| S | 54.883511 | 13.391553 | 64.364924 |
| H | 54.527384 | 6.307043  | 65.063390 |
| H | 50.228973 | 3.916170  | 72.609995 |
| H | 50.484066 | 3.604773  | 70.881252 |
| H | 49.383270 | 4.899989  | 71.398575 |
| H | 51.329738 | 6.148354  | 72.413267 |
| H | 52.431720 | 4.864254  | 71.900422 |
| H | 52.007620 | 5.386224  | 69.515092 |
| H | 50.770664 | 6.576983  | 69.965571 |
| H | 54.737504 | 6.849889  | 67.877945 |
| H | 53.018488 | 6.760777  | 67.765359 |
| H | 55.605443 | 8.176889  | 69.319913 |
| H | 55.008078 | 8.219570  | 70.973553 |
| H | 51.636187 | 2.563155  | 62.391517 |
| H | 51.404440 | 2.973053  | 64.104367 |
| H | 53.593934 | 3.832898  | 63.283519 |
| H | 54.109569 | 2.234252  | 62.785377 |
| H | 54.173713 | 1.458611  | 65.122681 |

|   |           |           |           |
|---|-----------|-----------|-----------|
| H | 53.357873 | 2.899754  | 65.693119 |
| H | 53.524187 | 4.885244  | 65.428024 |
| H | 57.525696 | 4.514977  | 64.826159 |
| H | 56.750044 | 6.106585  | 65.041189 |
| H | 57.657056 | 2.730793  | 61.299523 |
| H | 56.581632 | 3.648505  | 62.373065 |
| H | 58.350290 | 3.789872  | 62.535657 |
| H | 58.443485 | 4.882963  | 60.224638 |
| H | 56.696687 | 4.699535  | 60.079805 |
| H | 56.451746 | 6.151279  | 62.193707 |
| H | 57.009429 | 6.978063  | 60.716633 |
| H | 59.358081 | 6.874331  | 61.533716 |
| H | 58.830637 | 6.058339  | 63.015254 |
| H | 57.891923 | 8.766484  | 62.219056 |
| H | 59.134633 | 8.470005  | 63.244525 |
| H | 51.233082 | 2.960573  | 59.248013 |
| H | 52.264827 | 3.998731  | 58.242373 |
| H | 50.729161 | 4.623107  | 58.878386 |
| H | 53.132652 | 3.775026  | 60.611393 |
| H | 51.606031 | 4.392884  | 61.223283 |
| H | 52.078488 | 6.620051  | 60.132862 |
| H | 53.659987 | 6.005017  | 59.619064 |
| H | 54.214444 | 5.475662  | 62.027751 |
| H | 52.630639 | 6.092340  | 62.520842 |
| H | 54.836431 | 7.681393  | 61.367600 |
| H | 54.226948 | 7.731839  | 62.999363 |
| H | 59.760942 | 11.405755 | 65.238006 |
| H | 54.540592 | 11.800600 | 68.870550 |
| H | 50.856547 | 10.102721 | 63.916396 |
| H | 55.959712 | 10.750100 | 60.064200 |
| H | 59.606915 | 9.622798  | 67.563470 |
| H | 57.924093 | 9.407010  | 68.110908 |
| H | 59.137231 | 10.146388 | 69.197799 |
| H | 59.511296 | 13.281009 | 67.072527 |
| H | 59.582168 | 12.866743 | 68.795913 |
| H | 57.079623 | 11.620685 | 69.371765 |
| H | 52.296398 | 9.231515  | 68.644640 |
| H | 51.064813 | 10.320486 | 69.335909 |
| H | 52.777143 | 10.566525 | 69.723823 |
| H | 52.058192 | 13.279396 | 67.158456 |



|    |           |           |           |
|----|-----------|-----------|-----------|
| H  | 52.580365 | 13.002211 | 68.835385 |
| H  | 50.814691 | 9.745581  | 66.775312 |
| H  | 51.211328 | 10.005708 | 61.294316 |
| H  | 53.343200 | 10.360923 | 59.653484 |
| H  | 58.583826 | 11.135395 | 60.415175 |
| H  | 60.169604 | 11.414252 | 62.596639 |
| H  | 53.040105 | 12.655960 | 62.219315 |
| H  | 52.571287 | 12.837371 | 64.759869 |
| H  | 52.797631 | 14.585517 | 64.608811 |
| H  | 52.754214 | 7.672724  | 71.255222 |
| H  | 56.192962 | 2.584162  | 65.010031 |
| H  | 57.574493 | 8.009819  | 63.742776 |
| H  | 53.321747 | 8.285170  | 61.629439 |
| H  | 51.554581 | 13.541873 | 62.629149 |
| H  | 53.027233 | 14.426348 | 62.163964 |
| O  | 52.281498 | 7.337049  | 66.002815 |
| H  | 53.034944 | 7.730954  | 65.479983 |
| H  | 51.608424 | 8.038858  | 66.016335 |
| O  | 56.483524 | 7.486370  | 67.599672 |
| H  | 56.637474 | 7.740940  | 66.639926 |
| H  | 57.253757 | 6.948588  | 67.848248 |
| H  | 51.855049 | 1.324421  | 63.636361 |
| Fe | 54.624851 | 17.675886 | 67.226816 |
| Fe | 56.811637 | 15.850390 | 68.050493 |
| Fe | 55.216705 | 15.044071 | 65.897644 |
| Fe | 56.984533 | 17.135691 | 65.431089 |
| S  | 57.490789 | 14.862076 | 66.088703 |
| S  | 54.683108 | 17.125687 | 64.912577 |
| S  | 56.896255 | 18.212354 | 67.531893 |
| S  | 54.516738 | 15.435481 | 68.069523 |
| C  | 56.384436 | 16.838522 | 71.093916 |
| S  | 57.478654 | 15.671292 | 70.187027 |
| C  | 53.777736 | 20.906312 | 67.046846 |
| S  | 53.239997 | 19.342891 | 67.873204 |
| C  | 58.430386 | 19.876242 | 64.606136 |
| S  | 58.252703 | 18.185680 | 63.890146 |
| H  | 55.337466 | 16.553125 | 70.943746 |
| H  | 56.544032 | 17.854417 | 70.718640 |
| H  | 53.148681 | 21.712116 | 67.437826 |
| H  | 54.829270 | 21.106069 | 67.277263 |

|   |           |           |           |
|---|-----------|-----------|-----------|
| H | 58.765641 | 19.815020 | 65.646016 |
| H | 56.639674 | 16.782975 | 72.156995 |
| H | 57.469368 | 20.399157 | 64.561154 |
| H | 59.170413 | 20.415028 | 64.004823 |
| H | 53.642890 | 20.818753 | 65.963878 |
| H | 57.168829 | 13.084092 | 68.377250 |
| H | 50.537340 | 11.412417 | 66.297216 |

---

## References

1. K. Parey, E. Warkentin, P. M. H. Kroneck and U. Ermler, *Biochemistry*, 2010, **49**, 8912-8921.
2. B. R. Crane, L. M. Siegel and E. D. Getzoff, *Biochemistry*, 1997, **36**, 12120-12137.
3. D. Bykov and F. Neese, *J. Biol. Inorg. Chem.*, 2011, **16**, 417-430.
4. D. Bykov, M. Plog and F. Neese, *J. Biol. Inorg. Chem.*, 2014, **19**, 97-112.
5. M. H. M. Olsson, C. R. Søndergaard, M. Rostkowski and J. H. Jensen, *J. Chem. Theory Comput.*, 2011, **7**, 525-537.
6. C. R. Søndergaard, M. H. M. Olsson, M. Rostkowski and J. H. Jensen, *J. Chem. Theory Comput.*, 2011, **7**, 2284-2295.
